# Supplementary material for: Comparative Tissue Identification and Characterization of Long Non-Coding RNAs in the Globally Distributed Blue Shark <em>Prionace glauca</em>
Source: Preprints.org preprint supplement (doi:10.20944/preprints202408.0166.v1), 2024-08-02
Supplement: Supplementary file 1 [file supplementary]

## Sheet: Sup. Table S1
		Supplementary Table S1: List of primers used in RT-qPCR.
		Gene ID	Forward (5´-3´)	Reverse (5´-3´)
		beta-actin	TGCGGAATCCATGAGACCAC	ATGTCGACGTCGCACTTCAT	Subgroup evaluation reference RT-qPCR genes
		TRINITY_DN16185_c1_g2	AGCACAAGATCCCACAAACC	AACAAGTGGGTCGGTACAGC
		TRINITY_DN1059_c1_g3	CGATGCTGGTGTTGTACTGG	TCAGAACTCCCCACTCACCT
			CGATGCTGGTGTTGTACTGG	TCAGAACTCCCCACTCACCT
		TRINITY_DN12104_c1_g1	GGTTTTCTCCCACAGTCCAA	CCCCATTTCCTCAACACATC
		TRINITY_DN12484_c5_g1	TTCTTTCTGGGGGAGGAGAT	AAGCAATCCTGGTTGCATTC
		TRINITY_DN13711_c0_g1	CGTTCCACAAGGGAGGTAAA	AATTGCCCAGAGCAGCTAAA
		TRINITY_DN14133_c0_g2	AAGTGTCCCTTGGTGTCAGG	CTGCACCGACAACAGTCCTA
		TRINITY_DN167_c2_g1	TGCATTGGAATAAGCTGCTG	GGCTTTGGCAATTGTGTTTT
		TRINITY_DN1878_c4_g1	AGAAAGTAGGGAGGCGGGTA	GCTTGTCAAAATACCCAACCA
		TRINITY_DN433_c0_g5	GCCATGCATTCAAGTGGTTCA	CGTGGGACTAACATGGCTGT
		TRINITY_DN81282_c0_g1	GACACCAGAAGGCAGCCTTT	TGGTTGCCTGAACACATGAAG		Target RT-qPCR genes
		TRINITY_DN4558_c1_g1	ATAGGCTGTTTCCAGGTGGC	GAAACAAGGCCGCTGCTATG
		TRINITY_DN8728_C1_G1	TTTTCCGAGGCAGTGGGAAG	TTGTGACTGGAGCCCAATCC

## Sheet: Sup. Table S2
Supplementary Table S2. Overview of all libraries sequenced
Library ID	Sample ID	Raw Reads PE	Clean Reads PE	Q30(%)	GC Content(%)	Mapping rate (%)
Spleen CHBS.1	Spleen 1	48279204	45493494	94.23	46.48	96.43
Spleen CHBS.2	Spleen 2	48065220	45022692	93.67	46.36	95.32
Spleen CHBS.3	Spleen 3	48004206	45272767	94.31	46.74	93.21
Spleen CHBS.4	Spleen 4	47923204	44971135	93.84	46.44	91.23
Liver CHBS.1	Liver 1	48072686	44371089	92.30	47.26	89.78
Liver CHBS.2	Liver 2	48188692	45205812	93.81	46.06	92.92
Liver CHBS.3	Liver 3	47678322	44827158	94.02	45.77	92.89
Liver CHBS.4	Liver 4	46399268	43810189	94.42	45.57	97.95
Muscle CHBS.1	Muscle 1	48272110	45486809	94.23	45.26	92.56
Muscle CHBS.2	Muscle 2	48306078	44470575	92.06	45.31	98.79
Muscle CHBS.3	Muscle 3	46324932	43721471	94.38	46.35	97.67
Muscle CHBS.4	Muscle 4	47180502	44142078	93.56	47.09	97.21
Kidney CHBS.1	Kidney 1	48125666	44944559	93.39	47.51	98.56
Kidney CHBS.2	Kidney 2	48166606	45387393	94.23	47.17	97.39
Kidney CHBS.3	Kidney 3	47555090	44264278	93.08	47.77	98.28
Kidney CHBS.4	Kidney 4	47188110	44460637	94.22	46.96	97.96

## Sheet: Sup. Table S3
	Supplementary Table S3. High confident blue shark lncRNAs identified
lncRNA Name	Sequence
TRINITY_DN11379_c0_g1	GCTCTTTTCTCTTGTTACAGATGCTGCCAGACCTGCTGAGATTTTCCAGCGTTTTCTCTTTTGGTTTCAGATTCCAGCACCTGCGGTAATTTGCTTTTATTCATTTTATCTTTCATGGCTTAAGCTTCAATTTTACAATTTCATTTGCCCCGGAATATACTCCTAAAATATTTCAACATGAAATACTGATATTTGACTGGATTAATCTTCTTTTCGATTGAAACCTTTCCATTTCAACATTTTGACGTGTTTTCATTTAACCAACAACAAACTTTTGACAGTGTTCTTTTTCCAAACAAAAGCAAGTCCAGTTTTTGATATACATCCACAGTCAAATTACGCTATGACAATTAATGGATACCCTTGGGATCCCAGTGCCTGATACCCATGGATAATGTC…
TRINITY_DN11317_c0_g1	CTCACTCCCAGTTTTGTTCCATTACTGACCCTGTTCCTGAATGTTCCTCACTCCCAGTTTTGTTCCTTTACTGACCCGGTTCCTGTATGTTCCTCACTCCCAGTTTTGTTCCATTACTGACCTTGTTCCTGAATGTTCCTCACTCCCAGTTTTGTTCCATTACTGACCCTGTTCCTGTGTGTTCCTCACTCCCAGTTTTGTTCCATTACTGACCTTGTTCCTGAATGTTCCTCACTCCCAGTTTTGTTCCATTACTGACCCTGTTCCTGAATGTGTTCCTAACTCCCAGTTTTGTTCCATTACTGACCTTGTTCCTGTGTGTTCCTCACTCCCAGTTTTGTTCCATTTCTGAGCCTGCTGACTTGCTTTCAAAGATGTTGCAGAAAAAAGGGGAAAGTG…
TRINITY_DN11376_c0_g1	ATTGGTTGAAGGAAGGACACCATTTTCAAAAAAATATTTTAGTGGTAAGGGTTCCATGCAGGCAAATGGATCTTTAATTTAACATCTCATCCGAAAGATGGCACTTCCCAACACAAGTGCTCCTTCAGTACTGAATTCAATGAAGCACTTTGATGCTCAAGTTTCTATAGTGGGACTTAAACCAACCACCTTCAGATTCAAGAGGTGAAAAGTGCTATTAACTGAGCAACAGTTAATATTTATACAACTCAGTTTGCATTGCAATAGTACGTGCAAGTTGCATTAATAGACTAATCTGAGTTTCATTTTGTATTTAGTAACCCACTTCCCGGATCAAAAAAATCAGTACTGTTTAATACAGCAGTCATTGACAGCCAAGTTATTAACCTGAATTTCATT…
TRINITY_DN11397_c0_g1	GTCCCGGTCCGGTGCGCAGGGATCATGTTGGCAAACCCCACCAAATATTGCGCATCCGAACCTTTCCACTTCTTCTTCAGTAGGGTAGAATTGTACGTCATGGACTTTGGAATCCCTTCCTGGTGATAAATGAAGTAAGGTTATCTATTGGTGCCTTCATTGGAATATAATCTATCAACAGCTTCAACTATCTTTGGAGAACTAGCGAAGCTGCGGACAACATTACCTGAAATTACAGGGTGGATATTGAGTGAAAGGGGAACCACTGAGAACATAAACTGGAGGAGGAAAGTGTCCTGTTTTCACAACAAAACTGCCTTCTGGAACTCGGATATCATTGGGCGTTCCCAGTCTCAGCGCCTCATGGTGAACAATCTCTTGCAGTGCACTGGGGGTTTC…
TRINITY_DN11375_c0_g1	GACAGAGGTGCAGGATTCTCAGCTGCTGCATTCACAGCAGACAGGGGGGGAGCGGGAGGGGAGCGGAGGCAGGGAGGGCTGAAATAAAGCAAGGCTAAAGGCCCGGTGAAATAGTTAGAACCCTGTTAGACCAAGCCTCACTTCTCCCCGCGACCCCCCCACCCCGTCAATTCGGCTGTGCCATAGCCACCCTGCGAGCAAGGGAGGGGTACACTTTGGACACCGCCGGGGCGGGGGGGAGACTGGCCGGTGCCTTCCCGGGATTCCCGGCGGGGGGGGGGGGGGGGGGAGACACTGGCCAGTGCCTTCCCGCCCCCCCTTGGACCTCGGACCTCAGCATCTTGTGTGACCA
TRINITY_DN11320_c0_g1	AGTAGGTACAAAGGAAAAGACGGGGATAAGTTTTTTTCACTTGGTGGTGGGTGAGTGGAATGGGCTGCCATTGGTGGTGGTGGAGGCAAATTCGTTGGTGTCTTTTAAGAGACTTCTGGAAGAGTACGTGGGATTTAATGGAATTGAGGGTTATAGATAGGCCTGATAGGTAGGGATATGATCAGCTCAACTTGTGGGCTGAAGGGCCTGTTTGTGAGTTAGTTAGTTCTACAAGGAAAGATGGTTCTAAAAGGAAAAACTAGCTTTTTCATGCTGCTACTATGCAGTAACAACACAAGTGACATTGTTCATTAAAGGGATGCTGTCGTCAAGCCAGGAGGATATTCTGCATACCATGCACGAGCAATGGGATATATTAACTTCAGTGCCAATTGTGTA…
TRINITY_DN11325_c0_g2	GTTCGGTGCAGACTCGATGGGCCGAAGGGCCTGTTTCTGCACTGTAGGGTTCTATGGTTCTATGGTGGTCTCCCCATTCGGGGCGGATGGGGGGGGGGGAGCCAACTATGCTCAAAACCCCTCCCCACCCCTCCCTGCGCGGACACAGTTTGTACTATGCTAACACCCCCTCCCCCCCTTGCTCTATCACCGGTGTCGCGCGAGTTTGAACCCTTGAAATTACTATTGTGCAATTTCCATTCTCCTCTTGACAATCGAACAGTGTCTACAAAATCCACGTAACCCGTCACGCCAGGAGGTGGGGGGTGGGAGTTTCCCAGTGCAAATTCCAGACATTCCGAGACTATCTTTGTAAGGTTGACTGAGCTTCAGGGCGACGAGCTTGTGTTAAAAACTCGG…
TRINITY_DN11308_c0_g1	AGAACCGGTCAGTGCGGCTGCGCAGCACCGAGCCTGTGGGACAGGAGCCTGATAAATAAGAACGAAACACTGGAGATGGAGTGAAAACAGAAAGTGCTGTAAAAAGCCATCAGCTTTCGAACGAAACAGTCATTTGGAGTCGAAAAGTTAACTCTGTTGTCTCTACAGATGCTGGCAGACAGGGAATATGATGGTGTGTAAGGGTTGTAGATTCTTGCGGCCTGGATGTGGATGAGACGGTGTTGTAACTTATGAATAAGTCTCGAATTTGCAGTTGTAAAATCAGAGCTCACCTGTATTACTTTCACCAGTTCCTGGCATGCACTCACTTGCACAGTTGCTGTCAAAAGTTTCTCCGCAGGTTTCGTATTGCAATCTTCCTGGATGGACTCAACATTA…
TRINITY_DN11322_c0_g2	CCCCCCCCCCCCCCCCAAATCAACTACACCCCCTCCTCCTCAATCGGTGCAGGGACTGAGTCCCCCAATTCCTGCAGTCCCTTATGCAAGTGGCCATTTTTGCCGTTTGCTATCCATTGGGTAGTCCATTGTGATTCCACAGATAGAATACTGGTGGTACAGAATGACTATCACCACACACTGATCAGGTGCCAGAACCTTGGCTAATGTTACCCCGCCGTCTGCCCATTAACTATCATTAATAGCATCCCCAACAGGCCTGACCATGTAACTGCAGCACGGTCACTTCATTCATTGTTTGCCCTCCACGCCACATGACATCCTGACTTGGAAATATATCGCCATTTCTTCACAGTCGTTGGGTCAAAATCCTGGAGCT
TRINITY_DN11322_c0_g4	TAAGTGGCACTCCCCCACAGGCAATCACAGAATTGAAATGATTACTCAGTGGTTCAGCCAGTTCACACGAAGCAGTACTCTCACCTGAGTTCCAGTACCCCGATAGTCTATATTTTAATTTGATGTTTTAAGTTTCCTTTCTACTTTGTCTTTTGTTTCAGGCGGTTCCCTTTATGGGGGCTGCCCCTTCTAGTTTGTCCCTCAGTTAACTTGATCTCGTTTAATCGCTTAGTCAAAAAGATTGACACAGTTGCAGGAATGCAATCTGGTTACGGCTTACATTTTTACATGTCACCTGACTGCTGAGTCCCAGGTCAGGTGACCTAGTGAAGTACAGGATGTGCCATATTATATCTAAAACTGGGGCACACTACTTCAGTCATTCCAATATCATGACAC…
TRINITY_DN11322_c1_g1	AATCTCTCTACCTCTACCTTATCCATCCCCTTCATTATCTTATACGTATCTATAAGATCCCCCCTCAGCCTTCTAAACGCTAAGACTTGTCTTCTCTCTGAAAGCTTCAGGACAGTCTATACTCACTATAGCAAGTATATTTATGGTTTTTAACTGTCATTGAAGTGGGATCTACATGTGAGGAATGTTGCATATTGGAACTGAAATTGTGTTAAATCAGAAATTAAAGTTGTTTCCTTTCACTTTTAAATACTGTTCAACTGTTATTAGTTAAGCTGCTTCATTTTTTGGAATTATATTTAAGCTGTTATTAAATAAAGTTTGTTTTACCATGAAAGATCCCTAATTTGTCAAGGAATTAT
TRINITY_DN11349_c0_g1	GCCAGATTGTGGCGACTAGGGGATTTTCACAGTAACTTCTTTGCAGTGTTAATGTAAGCCTACTTTGACACTAATAAAAAAAAATTCTTTTAAATCTTAGACTATGACCATGGTTGAAAAGTATAATTAATGAAACGTTTAAATCCCTTTCATGAAAATGTTGATTCAAGATCTCTTGTTTTCTGAAAGCAGTAGTGCTTGTAAATGAGATCTGCAATTTAATATAATAACTGGTAATGTTAATGTGTGGTGACAGAAACAGGTTTTAAATACTGATGTCCAAAAACAATATTTCAAATCACCTGACCCTTTGTCTTTAGAAGGAAGTTTCAAAGATTAAGGATATTTTTTAATAAAAGTTTCTGC
TRINITY_DN11349_c0_g3	AGAATGTGGCAATTAGGGGAAATTTCACAGTAATTTCATTGTAGTGTTAATGTAAACCTTACTTGTGACTAATAAACTTTATATTCGTTTTGTGTACCCTGCCCCTCCCAGTCACTCTATGTCTACCTTATCCAATAACTTGCTTATTTTGCCTCCTCAAACAATTAGTACATCTTTATTGACAAGCAAACTCAGATATTGGCTCCAAGCAGTGCACCTCCACAAGTGACTTACAAAATGTGAGCTTCTGTGACTGTAAAAATGCAAAATTAAAGTTTAACAATGTGGTGTTCAATGTTGATCTCACAACATAAGTCCACACAAGAGCCTGCTAATATTTTACTCCTGTCATACATTCCCTGTAAATTGGTAGCACTTCAGGGAGGAAAATAGTTCCAG…
TRINITY_DN11321_c0_g1	AAATAAGACTGTTCTCACCTAGTCAGTAGTGAGTGTGCATGATTTATCTAATCTCCTCAAATTATCTGTTAAATATTTGGGGTGGAGTGATGTATTGAATATCAATATCATATATTGGCAATATGTCACAAAACGGCACCTAGCAGTGCTGCTCATTATAGCGATCGGAAGAAAAATAAACCACCACCGTTACTGTTTTTTCAACTGTTAAGTCAGGTTTATTTTCAAATTTGATGAGGTGGGGCCCTGGAGAGCAATTAATTAAACTCGTATCGTTTTGGCCATTGTTGGATTCCTAATTTTTACTTAAGTGAAACTTTGTGTGTTGGGAATCAAGAAAGAAACATATGCAGTCACTGTGATCAATAGGTGGCACTGGCTGTTGAGTAACATGCTGAG…
TRINITY_DN11388_c0_g1	GCACTGTGCACAGTTCCACTCTCTGTATTCCCTCGGTTAGACCCACACTCGGAGCACTGTGCACAGTTCCGGTCTTCATACACACTCGGAGCGCTGTGCACAGTTCCAGTCTCCATGTCCCTCGGTTAGACCCACACTCGGAGCACTGTGCACAGTTCCACTCTCTGTATTCCCTCGGTTAGACCCACACTCGGAGCACTGTGCACAGTTCCGGTCTTCATATCCCTCGGTTAGACCCACACTCGGAGCACTGTGCACAGTTCCACTCTCTGTATTCCCTCGGTTAGACCCACACTCGGCGCACTGTGCACAGTTCCACTCTCTGTATTCCCTCGGTTAGACCCACACTCG
TRINITY_DN11385_c0_g1	CCCCTCCCTACTGCCTCCTCCCCTCCCCTCTGCCTACCCCCCTCCCCACTGCTCCCTGCCTCTCCCCTATCTGCCACTCCTGCTCTCAGTATTACTCCCCAGTTGCTCAGTGTGTGTCCATACGCACTATCTCAGGCGGTGCTGTGTGATTATAGATGATGATCTCTCAGCCGCAGCTTAGTTGCTTCACCTTGTAGTTAGTGTCAGAGACTCTGAACGAGAGAAGCATCACATCGCCGCGGCGACAGAGCATCCAGTTTACATCAGTAACTATCAGTAATTCATAGTGCTAATAGAATGTATATTTCATGTTACAGATTCACTTAAACTGTAGCAGCCAATGTGAAAGATGGAGAGATAAAAACCATGTATAGTTAATTGCATAAAATTATTTAACTC…
TRINITY_DN11389_c0_g2	CGGGAAGTGCGCATGCGCATCACGAGCCCCACGCCTTTGTTCAAATCCGCTCGTGACTAACCGCCATCCAATAATTGCCCGCCAGAGGGGAGAGAACAAACTGACAGAGAGACAAACGAAACCCATCTGGGTCACCTATGTTCTTTTGACGAAGGAAATCTGCCATCCTTACCCCGGTCTGGCCTACATGTGACTCCAGAGCTACAGCAATGTGGTTGACTCTCAACTGCCCTTCAAGGGGCAGCTAGGGATGGGCAATAAATGCTGGCCCAGTCAGCATTGCCCATATCCCACCAATGAATGTTGCTTCAGCGAGGCGCTCTGGCCTTCCAGACTGCACACGAGGATCTTTTATATCTCTATCTCTTGCTCATTGTTTCTTGGGAGGGTGGGTGGGAG…
TRINITY_DN11389_c2_g1	GCTTTATAACTTTATATTTTTCAATATAGTCATCTTTGTAATAATTATTCTCAATTATAAGTATTTTCCATAGAACTGGTAATAACCCATTTCCTTTTTGATCATAACATTGTATGCCTGGACCATTAAGTAACTAACATAGTTAATAATGACAAATTGGTATAGACACAAAGCATGTATCATTCAAATATAGTAGCATAAAAATATTACTGGCTAATTGGGATTTCCTGTTAAACAGCAACAGCATTCTGATATATATTTTTATACTTCAATTCTGCATGCTGTTTTAAAATTTAAAGTGTTTCCTTCCCATTGGAATGATCAATATTTTGCAAAATGCTAATTAAGCAGTTTTAGAATGATGACCAATGTCAACCATTGGTTTGTCAAATGTGTTCC…
TRINITY_DN11389_c6_g1	GTAAATATGTGGGGTTATGGAGATAGAGCCTGGGTGGTCTGTGCAGGCTCGATGGGCCGAATGGCCACTTCCTGCACTGTCAGGATTCTGTTTTGATTCTATATAATCAAGTGATTTCCCAATTGCATTCCGGTCAGGGTAGTGGGTGAGAGTGATGGGGTGAGGGAGGTGGTTACTTTCACACCAGCTCAGAAGATTGGAACGTTCTGCAGTATAAACCTTCAGGCTGCCTTCGTAAACAAGAACATGAGACAGCAGGAGAGTATCCGCCCCCCCCTCAGGCTGAACAATCACTAACCTGCCTTAACGGGGGGAAATCTGGAGACCACCCAAAGGCCAGGGTTCAGAATCAGTTGGCAGGTTTAGGAAGGAATTAATCTCTGGAGGCTGAGATGCTTT…
TRINITY_DN11389_c6_g2	TCCAACACTAATTCTTCCATTACTGCAGTGAATTGGGTGGTGAGTGGTGGGGACAGTGCACCCAAGGCGAGTGACTGGAATGGGTTGCCCTGGGACAGTAGGTAGGAACTGAACCTCCCCTATCAGTACAGCCTGGAAGTTTTCCCCTTGCAATTGGCCCCAATTAGATAGCTCACTTTCTATTCGAGGTTAACACAATGTGGGTGGGATTGGGGTTAGAGTCGACACACAAAGAACACCATTTACACATTTATATCACGTCTGACGCAGAATCGTGACACGTGCAAAGCATCTCAGCCTCCAGAGATTAATTCCTTCCTAAACCTGCCAACTGATTCTGAACCCTGGCCTTTGGGTGGTCTCCAGATTTCCCCCCGTTAAGGCAGGTTAGTGATTGTT…
TRINITY_DN11389_c7_g1	AGCTGGGCGGTTTTAAAAAAAGGATAGCATGGACAAGTTGGGCTGAAGGGCCTGTTTCCATGCTGGAAACCTCTATGACTCAGGAACTAAAGCTTTCCTTCACGTGGGGCCGTTTCCAGCCTCCCGTGACACGGCGGTGAACGGATGATGCTTCCTACACCACCTGGCATTGTGAATATTTGAGCGTGCAGATCAAGTTGTAAGATTGCTGCGGTATTCAGAATAGGTCGGTGATGAGCAAGGGAGTCGCAGGGTGTGGGGGTAGATGGGAAAGTCAGGTTGAGGCCATGATCTTTGAAATGGCACCACAGGCTTGAGGGGTGAATGGCCTAATGCTGCTCCTGGTTCATATCATAGAATCTCTACAATACAGAAGGAGCCCGTTCGGCCCATCGAGCC…
TRINITY_DN11384_c0_g1	TACTGGGGGAAGAGATACAGTAATTCCTCCTTTCTGCTGATGTACCAGCAGGTTCGCACTGGGGAGAGGCCAGTCACTTATTCTGAGTGCGGGAAGGGACTCAATGTCTCATCAACCCTACTGATACACCAACACATTCACACGGGAGAGAGGCCATTAACCTACTCTGAGTGTAGGTAGGGATTCACTCAGTTATCCAATCTGCTGGGACACCAGCGCACTCACACCAACGGGAAAGCCTTTAAATGCTCTGATTGTGGGAGTTGCTTCAGAAACTCTGCCAACCTGAAGATCCAC
TRINITY_DN11348_c0_g1	ATCGATATTCACAAAACATATTTTAATTGCCAGAAATGCATTAATTCTGTACTGTACTCTTGTAACATGTAGCAGTAGTTTAAGCAATTCTAGATTTGAATTAGCAATTTTTCCTTCAATATTGAGGGAAGGAATAAATGTTAATAAAATGATGGAAGCATAAAGCATGTGTCAAGTGTTTATCCAAGTGGCCTCGATTTTGTCATAAAATGATTGATTTTCTGATTACTTTCAATATGTCCTTGGTTCCAATTCAACTCTGCCGTTTAACCCTCTCACAGGTATTGCTTAGACACCATGGTACTCTTTTTGCCTTCTCCTTTTTTTATATGCGAAAACAATGACTGCCAGTATTACTAGCAGTATTACCACCACTGCGATAAACAGTCCTACATATTT…
TRINITY_DN11324_c0_g1	GGAAGTGAGTGTCTCTCTGTCGTTCCATTTCATTTTGTTCTCCAGGCCAGTCCTGTTTTTCTATGTGAAGGCTGAGAGGTCATTCCAGACATGATCGGGCTGTTATTGGCTCCTCTTCAGCAGTTTCCCATTCTTTGGATGAAGCAGATGGTCTGCCCAGCAATTACGACTATGATGACTTTCTGATCGCTGGTGTGCTGAATCTGGATCATCATGACTCAGACCCTGATCGTGAATGAGGCGCTGATGTTTGGAAGAAGAAGTGTCTGAGAAATTCATTGCTAGCCTGAGACACAAGCTTTCGCTGAGACCTGCTTCCATAGACTTCACCCTGCCTTTTAACGTCAATGCAACTGAGAATCACCATTGATCCCACTCAAGATCTATTCCTGTTAGAGT…
TRINITY_DN11370_c0_g1	AAGTTTTCATTAAAATAAATTATGTTTTTCAATCTTAATGTGCTTTACGAACATTGTCCACTCATACAGATATAAATTTCAAAAGATACATAGGCTTTCCATCTCCATTTGTCCTCCATTATCCAGTTCCTGAGATCCAATTGGCTTATGGTAACTGGGAATACTTAAATGTATTACATTTTTTTACAGAAAGAAATCTGTAGTTTTTAGCCTTCTCCGGATTCCTTTGCTTCCCAGATAATTACTGTATGGAACCACTTATATGAATGAGGCAGCAAGTTTTACACAGTGTGACAAGTGCCCTAATCATGACACCCATGTCAGATGGCACTCAAAGTTGATCTCATTACTTACCCCACTTCAACACATCAAGAATTTTTGCCATTTAACTAGGTAGAA…
TRINITY_DN11398_c0_g1	GGTTTGCGCCTTCTCCCCGTGCCTGCGTGGGTTTTCTCCGGTTTCCTCCCACACCCCAGGGATGTGCTCTTGGGCTGATTGGTGTAGCGAATGGTCCCTAAATTAGTCTCCCCTCAATCTGGTTTCCAATGTGGAGTGCCATAAGACAAGGGTCATGGGTGTAAGAGGGGACTCACAATGGGCAGCGCGGGCTCGTTGGGCTGTGTTGTTCTTTGTCTCTTTGCTACAAAAACCATTTAGACTATCAGTTGGAGATTATTGTACACCTTGTTAATGAGTTAAAGGATGGGCATATGAAGTAGGAGCAGGAGTGGCTCGGGGAAGCAGTGGCACCACAGTATCGTCACTAGAATCTGTGGATGTGACTGGCACTTCCGAAATCCTCAAGAACTGGCATCG…
TRINITY_DN11338_c0_g4	GTCAAGTTGCAAATGGATTTGACTGCATTTCTAACAATTTGACTGATAAGAAGAACGTTACTGATCATTATCACAGTGAATTTCTTCTTCCCATCAGAGATATTTTCATCTGAATTTTGTGATGGGTGACAATCAGCTGTGTGCTGGTGAACTGGGGGGTCCATATGTGTGCGTCAGTCCAAATGACTGAAGTCATATGTTGTCTTAGTTACCCAGGAGTTAGATTTGTATCTTTCTATCTAATGTTTGCTGCGTAACTATTCAGATAAGTAACCTTTAACTGTTCAAAGTATCCAATTCCAACTTAGAATTGGGGAGCTTCTTGAAAGACTCATGGGAGCAGAACTGCCCACTAGAAGTTCAAATTTCCCAGGC
TRINITY_DN11328_c0_g1	GCTCGAAGGGCCAGATGGCCTACTCCTGCTCCTATTTCTTATGTTCTTATGTTCTTAAATCATTTCAGAAGTGGCTTCAGTCACCATTTGCAAGCTTTTCTGCCAAGTCACGAATATCCTGGCACACTCTAGGTATTGCTTGTTATTACAGAATTCATCAATAATTAGCAAATCTTCTGTTATACCAACTATCCCATTGGTGTTTACTTGGTATACAAGCCTTTTTTGAACTCTACTCAAAATGACCTTGAATGCATAGCATAACATGTCAGTGCAAGGGTGTGGTCGAAGTTATACTTTGATTATATTAATTGAATATTTTGCAATGGTAACATTTCATTAAGGGCTGCAGGGAGAATATAAAATGTTTCAGATGTAATTGTTATGCTAGGAAAACTG…
TRINITY_DN11316_c2_g1	GATTTCTTGAAATGTTTTATTTTGGAGCGAAATCACCTACGAAATTAAAATCTTACATTAATTTGTAGACTTCTCGTCCGGAATGAAGATGATTGAGGTCTTTACATAATAATATCCTCCATAGAGATCTTTGGCAAACACGCTTTTATGGAATTAACAAAGACTAGCAATTTGAATCATGAATGACACATTACGAGCACTTTAAAGTATGCCGTAAAGCTAGGTGAAACATTCAAACTAGTGAAAGTCAAATTTAGGACTAGCATTAGGAAATTCTTCACACAGTAACCAAAACAAAACTGAAACTTATGAATATTTTTAATGTAGCAAAATGTCCTAAGGTCCTAATTCACAGGACCATTACCAAACAACATTTAACATTACGCCACAAAAGGAGAT…
TRINITY_DN11373_c0_g1	GGGGTGTTTATTTCAACTTCTGAAAATAATTTTAAACTTAGTTTCCATATTTTAATTGAGATTCCCCACTGTCAGCTTGGAAAAGATTAAAAGGATATGGCTCTTAGATCATATGTATGATCAACTACAGGTTGATGCTGTGATTTTGTTTTGTAACGTAGCAGATGGCAAGCTCACCACTCATGGTAGGTAAGAAGTGGGTGCTCAACATCAAAGGAAATTGCGAAACCGTATCAAACCAACAATGTTCAAGTTAACAAGAAAACCTCTGCACCCATGTTTTTCGAAGTTTCCACTTAGTTTCAACAATGAACAGATAAGTTGACTTTACTCCAGAAAGAAACTGGTAATTATGTATAGACAACATAATATTAGATCTATGCATTAACTGTAAAGTTA…
TRINITY_DN11373_c1_g1	CCCCTAAAGCCTAGTTAATTTTGGAACAGTGCTATTTTAATCTCCATTTGGATGAAATTCCTTGGATACTTTAATTATACAGTCTTAATATACTGCATAGCATGTAACATTGGTATAGGTGTAAAATAGCAAAACAAAATTAACCCAAGGTCCATACTCCAATGCAAGTGGAACAATTTCTAGCACCTTTGAAGAGGTAGCAACTTTATCACAGCACCTCAACTGGGCACGTTGCAGCCTTCAGAATTTGATGTGCCCCATTTGGTGATGAGAGCAGCTGGTGTAGATTCTTTCATTCACATCCTCCTTTAGACCCATCATCCTTGTTTCTTCATTTGTTCCAGTACCTTCTTTTACCTTTTCCATCATCACTAATCACGTCAGCCTTCCACTCAACCA…
TRINITY_DN11339_c0_g1	CACCAAATGCTGTCTTGCTCTCGACCCCTGCCACCACTGTTTTTGGGGAGGGGGGGGCGCTTTATTGCACCAAATCGAAGATCGATGGTGTCGCGGGTGCTGACGGACGGAAGACTGCTCCGTTTGCAGGGTGCGGGGGAGAGCGGACCCTCTTCCGACGGGATGGCTCGGTCGGTTGATGGTCAGGGGCTTTGGCTTCACCTTGAGTTAGGGTGTGGACCTCTCTCTCTCTCCCCCTCCCTCCCTCTCTTCCCCTGAGCTCCCCACTGCGATCTTCATTTGGCACCCTCTTGTTGGCGAAGGAGTTATAGGTGGGCACGGGTATTGAGCGATATCAGTCATCTTAATTCCCCCCACCCCCCACCCCCGCCAACCAACCCCCACAATTCTTTCTCATTT…
TRINITY_DN11369_c0_g1	GCAGGGAGGTGGGGGGGGTGAAGTACTGAAATTCACACAATTTACATTGGAAACTTCCCAGTAAATTCTCATTAAGTTGTGTAAGGAATCTTGGATGTACAATTCTTGTGCATTTCTTAACAAGAAGAATGAGCAGTGAAGTAATCTGCTGAAGGTTAAAAGGAGATTTTCCCGTCAATTTAGTGACTCATTCTTACCAACAACCAAACTATCCTCACGCAAAATTGAACTATGGAAAATTCTAATTGCGAGCATTCACCTTTAGTAACTGTACGACTTTCAAGTTTGTGGGCATGTTTTCAAAGCTTCAAAATATACTCTTAAGCCCGGGAATGTCTATGTGGCGAATATTACTGCAAATTTCTCAGTCAGTACTTTTCTTTTTCCACAATATTTCGT…
TRINITY_DN11309_c1_g1	TCCCTGCTGCCATCAAACTTCTGAATGGACTTATGTTATAGCAAGTTGATCTTTCTCTACATCCTAGCTGTGACTGTAATATTACATTCTGCACTATCCCCTTTCCTTCTCCCTCATGTACTCTATGAATGGTATGCTTTGTCTGTAGCGCGCACAAGAAACAGTACTTTTCGATATATTCCAATACATGTGATAATAGTAAGTCAAATCAAATCAAATCATTCATTCTCTACCAGCTCTGAAATTTGATTTTTCTCCTTTTTGAAGTGTTTGTCCAATTCCATTTTGTGAATTGCCACTCAG
TRINITY_DN11309_c5_g1	TGGTGGGATACAGTGAAAAGTATTGTCTCTTGTGTGTTGTACAGACAAAATATACCATTCGCAGAAGATATAGGGGAGAAGGATTTGTTATTGTCATGTATTGGGATACAGTGGAAAGTATTGTTTTTTGTGCGCTGTACAGACAAAACATATCATTCATTGCGTACGTAGGGGAAAAGGAAAGGAGAATGTAGTGTTATTGTCATTGCTAAGATGTAGAGAAAGACCAACTTAATATAAGGTAGGTCCATTTAGATCAGCCATGATCTTATTGAATGGCGG
TRINITY_DN11309_c6_g1	TGAGGACAAGTAGAACCGACTCAAGAACAGCTTCGTCCCTGCTGTCATCAGACTTTTGAATGGACTTACCTTGCATAAAGTTGATGTTTCTCGACACCCTGGCTATGACTAGAATACTACATTCTGCACTTTCTCCTTCTTTATGAATGGTATGCTTTGTCTGTATAATGCACAAGAAACAATACTTTTTACTGTATATTAATACATGTGACAATAATGAATTAAATCAATAAAAACCTG
TRINITY_DN11329_c0_g1	AGTGTACTCGAACAAGCGCCAGAGTGTGGCAACTAGGGAATTTTCACAGTAACTTCACTGCAGTGTTAATGCAAGCCTACTTGCGACACTAACAAATAGACTTTAGTTCGCACGGCACTTTGTGGAAGTGAGGTCTTCCCATCCTGACGGTTGGGAGGGGGGCAGAATTCAACCCAATATTTCTTCTTAATGTCACAATCAGGGAGCGACGTGAATGGCAGTGGTTGAAGTTTTAAGATGAAGACTAACGGACATCGATTTGATGGGCAAATGTCAAAAAGTAGATGGAAACAGCGTACGGGCTAGCATGGGGCAACAAATCAACCCCAGATATATTTTTACGCCCCACATTACTTTCATATTTCCCATGAGGGTGAATGACAGGCAGTATTGTGACAG…
TRINITY_DN11329_c1_g1	AGCAAATTACTGTGAATGCTGGGACCTGAAACCAAAGGAGAAAATGCTGGAAAATCTCAGCAGGTCTGGCGGCGTCTGTGGGGGGATCTGTGGGGAGGGGAGAGGAGGGGAGCTGATGTTTCGAGTCCAGGGGAGCTGATGTTTCGGGTCCGGATGACCCTTTGTCAAAGCTCCACACAGTTTATCCAAAGTTTTGGCGGGGGGTCGTTTGGACTCGGGGCATCAGCTCTTTTCTCTCCTTGCAGATGCTGCCAGACCTGAGATTTTCCAGCATTTTCTCTGTTGGTAGGAAAAGATGCGTGCTGCCAGACCTGCTGAGATTTTCCAGCATTTTCTCAGACTCCAAGCATGCACAGTGATTTGCTTTTATCTGGATTGTTAGCCAAACTGGACATAATA…
TRINITY_DN11329_c6_g1	CGGTTACAAGGATAGGGGCATGGGTGGGATTGTTCTCAGTGCAGACACGATGGGCTGAATGGCCTCCTTCTACACGGTGGGGATTCTATTTGGACTCAAAACGTCAGCTCTTCTCTCTCCGTACGGATGCTGTCAGACCAGCTGAGATTTTCCAGCATTTTCCTCTTTTTTGCTTTCCGATTCCAGCATTCGCAGTGGTTT
TRINITY_DN11329_c10_g1	TCTATGTTTATATCTTAACATTTAACATTTATTTGTTCGTGTCACAAGTAGGCTTGCATTAACACTGCCAAGAAGTTACTGAGAAAATCCCCTAGTCGCTATGATTGTATGATCTGTGGAGAGAGAAAAACAGAGCAATAATTCTTCCTCAGGATCAGAAAGCAGTTAAATGTGATAGGTTTATGCTGTTGAAAAAGTGAGGAAGGCCAGGGATAGGTTAGAGGACAGGAGAGATGAAATGACAAAGATCTCATGGAATACAAGACAAAGGGGGTGGTAATGACAGTGTTAAAGTATAATCTGAACTGGTCCAGATTAGGTGTTAAAAGCAAAATATCAGTCAGCACTGTCGGAAAGCAAAATAGCAGAATGTGTTCACAGCAGAAAAAGAGTCAGCGC…
TRINITY_DN11301_c0_g1	TCTGAGAGGAAAGTATTCTGATATTTTTCTCATCCCCATTCCTCTGCCTTTTCCCCATATGCCCCTATTGATCAAGAACCTATCTATCTCTGTCTTTAAGCACACACAGATAGATGGGAAGCTTCGGTCTGAGAGGAAAGTATTCTGATAGCTAATCCGCTGCTGTTGTCAGACAAAAAGAAAATCACCTCGACAGAACATACGGATGTGGATCAAAAAGATGAGGCTGGCGGTTATCCACTAACTTTTTTTTTGTTTCTGGCGAGGTTAAACCTCTATATGAATGCTTTGTCCCTTCCTTTGTGGAAACAGTGTTGATGAATGGTCTGAAATGATTGAAATGCAATCCTTTTCCACTGTCTGGACAGAAGATGGGGATGAATCAACATTTCAGCGACT…
TRINITY_DN11366_c0_g1	TTTTTTAAAAATATATATATATATGTGTGTATAGTTCAACATTGGAAAGAAAAAAAGGCAGAAAAAAGGCCTCGATTTTAAGTATTTTCATTTGCGCGTTTTAATTAGGGATAGGGACTGTAGTGGTGGTCACTGTCCCACGATTGCAGTCTCTGAACACTTTCTCCTTTTCCTATCAATGTAACTTGCGTTTTACCATCCACCCGATTAAATAAATGGAGTTGGTGACCCTCGAGGCATTCAGTGGCCAGACACTTTCTTCTGCTACAGAATCAATGTTGTAAAGTTAGTGTTAGGGCTCTCAAAGGGAAGGGGGCTGTGTACGGCG
TRINITY_DN11366_c0_g2	TGGGGGGAGGGGGGGGAAGAAGAAGAAAAAAAGAACCTTTTAAAAAAAAAACTTTACTGTATCTCCTGATCGGTGTATATAAGCTAGGAGCCACTGACGAGCTTTCTCATTCCCCCTCGCGTCCTGTTGATTTTTGTCCATCTCTTCCTTCCTCCATCCCTCTCCATTTTCTTCATGCATGAAGTTTTTTTTTGTAGGTCGGTGAATTCCACAGAGCTGCACTGTCTTTTAAACAGTAATAAAAAAATATATAATTACACGGTCAGCTGTTCTGAGAGAGGGCAATGTATCAAGGGAGAAGAATGATTTTTCCCCCCTCCCCCCCCCCCGTCGATGTCTATGCTGTTCTTTACTCTTTTTTAAAAATATATATATATA
TRINITY_DN11366_c0_g3	TTTTTTAAAAATATATATATATATCTATACAGAAAAAAAAGACTTTTTAAGTATGTTGTGTAGTGTCCTAACACCACTTAGTATACCTGGATCCAAAATATTTCTGAAGGAACACCAAATTTTTGCTGTGGATGCCATTCAGTGCGTTAAGAGCTCTTGTCGTAGCATGTGCAGGGAAACTCCCAGTATGTGGTGGACATGGACATTTTGAAAACCTTCTATTTCCAACCAACTCTACTATGATGTTCAGTAGACCACTGTAGTACGCACCAGTACTGCGAATGATTGCTACAGCATAATGACACTGTAATTGGCTGTCGCAGTGCTGTTAACACCCCTGATGTGCTCACATCATCACTTTTTACATTTGTTTTTTAAAGAGACCATTTCCTCTAGGTG…
TRINITY_DN11319_c2_g1	CAGTGTACCCGAACAGGCGCCGGAGTGTGGCGACTAGAGGATTTTCACAGTAACTTGATTTGATTTATTATTGTCATGTGTATTAGCATACAGTGAAAAGACTTGCGTACTTGTGACACTAATAAACAAACTTAAATATATTGTCCAGACTGAGATGTACAAGACTGTGTTAGACATTTGAAAGAGAGAATTGTGATGAGGCAGATGTGATCCTCTGCTTACTAAGTGATTTGTACACACGTTTAGGGAAATTTCTTCAGCTAGGGATGTGTGTACCATGTTGATACACTGAGGGAGGTAAGAGATGTGAGACTCACGACAAATGTAGCACCATAACTGGCAAAAAAATTATATTGTTTGCAAATTGTTCTTAATTTCATATTTATTAAATAAAAGTGA…
TRINITY_DN11319_c3_g1	GTCCATGATGATGCTGGCTGCTGTTCCAAGGCAGTGGGAAGTGTAGACAGAATCACTGGATGGGAGGCTGGTTTCTGTGATGGATTGGGCTTTGTTCACAGTCCTTTTGTAGTTCCTTGCGGTCTTGGGCAAATCAGGAGCCATACCAACCTGTGATACAACCAGAAAGGATGCTTTCTTTGGTGCATCTGTAAAAGTTGATGAGAATTGTAGCTGACATGCTG
TRINITY_DN61703_c0_g1	CCCCAGCCCCCCCACTCCCCCAAAGTGTGTTGTGGTGTCTTGCAGTTTAGCAGTATTTTATTTTTTATTGCTATCATGCACTAAATGTCTTAGACTTTTTTTAGAATTTACTGTCCACAGGTAGTCACAAAGAAACTTCACAAATAATAAACCCAGTTGACCAAAAAAGTTGTCATTTTTGTGCACAGAGCTTTATGCCACCTATTCTTTTCACTGTGATCCGCGTTTCGTAACTGTTTTTTCTTGGTATTTGTTAGAAACTGGTTGAAACTTTTCTGTATGGCTGGCAGTAGTGGAATCTACTCCCTCCATTGGCAGAACTAGCTTTCTTTCTGTCTCTGGTGATTAGCCATATGGTATACTCTGTTCTCAGCACTGTAAACAGTCCCTATATGATAT…
TRINITY_DN61715_c0_g1	TGTGTTGTGAGATTTCTTACTGATCCCAGTCCAACACCAGCATCTCCACTCCATTTCATTGAAACAAAAACAAATTAAGCTGGACAGGTTAATTACTGCATGTTAAAAACAAACATTTTCTGGATTAAACACATTAGTTTTCCTTAGTCACACAAAGTTATTGTTTGGCTCAAGTGAAAAGGAAACCTATAAATTAATAAAATGGACAAACTGCATAGCAGTCCCCCACAATCAC
TRINITY_DN61772_c0_g1	TCTGCAGACTTTCCACACCCTCCACGCAATTTGCTTTTCCACTTTGTGTCATCAGCAAATTTCGACACCTCTCAGGGGCTTGCTTTATACAGGGCTCGGTATACAAGCTCCACCTGGTAGTAATTACCAATCATCAGGGAGCTTGTATTCTACAAGTCCTACGGGGGGGCTCAATCAGAGATTCCCTATGTAAGTTCTGTAGGTTATCAGAATTCTATTTCTTCCACACACTACCTTCATGTATTGGCATGAATTTTTAGAAGTTTTTGAAAAGGTGTCCTAATTTGATATGTGACCACTTCTGCCAGATCAGCAAAGCATGGATTAGACATCTTTCTTTGAGTTTTTTTCAACTTCTCAAACTGCAAAGTCGGCTTGTAGCCAAGGGACTTTCTACCA…
TRINITY_DN61746_c0_g1	TTAATTCTATGGGTGAACTGACCTGATAACTGCAAGTGAGTAGTTACAAATTAATATTTCTGTTGTGTCTCAAGGCTCTGTATTCAATCTGGAATACAAGTGGGGTTGTGATGAAGTCTGGTGGTGGAAGTGTGGGGTGTGGAGATAGGGTGAAAATGTTCTTACTGGGTCCACTTAAAACGTGAAAAAAAACCTCATGGC
TRINITY_DN76495_c0_g1	AGACTCGATGGGCCGAAGGGCCTGTTTCTGCACTGTAGGGTTCTATGTTCTTTTCATTATCAAATTCTAAATTTCTAATTTGACAGATATGGACAAATCAACATATTGGTTCTTGGGCAGAGTCAAATGGATTTTTTCTGTATTTTTAAACAACTGATTATAGTTTCCAGGGCCACTGATATTGCAGCAAATCACCTAGAGGTTTGTACAAATTCAGAAACTTTTTTATAAACATCGCAACATGCTATCAATTTGAACCAAAGACTTTAGCCTTCACTGACTTGGCCTTAACCATTCAGGCAAAGTGCTTGAACACGTGAGATATGGAAATTACCTCTGAAGTGATTGTTTCTGTCTCTGATATAAAAACTGAAAACCAGCAAGCTTGGGTATAATTGT…
TRINITY_DN76482_c0_g1	TGTGTGTGTGCGTGTGTGCGTGTGTTGTGAATGTTGTGAGTGTGTTTTTTTCTGAGGAGGTGTGTGTGTCTGACCGATGAAATAAGCCAATTCAGCAACAATCTCAGCTGGAAAGAAAATGGAATCTTCAGTGTCAAACTGCACATCACTGGAGTCTCAAAGCTGACTATTCGCCTGCTGAAGGCAGCACTACTGGAATCTCAAATTGCAGCGGCCACAGCATCTGGTAACCTCCTCCTCCTGAGTCCATGACTGCTTTATTTACTTAATTTGGACTCAATTCTCTATTTAATCTGTATAAGCTGTCATTCTGTCATTTTCTTACCTTTGGAAGTTAATAAACTCATTCCGTCTTTAACTCCGGAT
TRINITY_DN72400_c0_g1	TGAGCCCGGGATTACCTCACTGGGCTAACTATGTGAAGGGAGTTATTCAATATTACAGGGGTAGGACCACACATAATACCAATAGATAACTAATATATTCAACTATGATTTGTTTTGATCTGCAAAGTCCAAAACTAGGAGCCATCAGTAAAAGATAGTCATTAATAACTTCAGTAGGAAATTCAGGAGAAACTACCTAGAATGTGGATAGAATATTGATCAATGCTACTAGATGGTAAATATCATATGAGTCTTCAAGAGAAAGTTATGAGGATGAAAGAAATAGATGGCTATGTTGAAAGGATGGGATGAAAATGGAAGTTTGTATTGAGCCCAGACACTGGCATGGATCTGTTGGGCTGATGATAAAGCAGAGAAGTGGGCCGTCCTATAATCTGA…
TRINITY_DN72489_c0_g1	AGTTTACTTCTTCCAAAAACAAGCTTTGTTTTCACCTTGATGCTGCAAAACCACCTAACTTTTAAAACTATTTCTGTTATTTAATTAAATTTTCTGTTTCCATCCAGCACTCATTCCTCGCTGTGATTTCAGTGTTAAAACCCCCAAAGTATAATCCCAGGGAAGAAAACACATTACAGCTCTCACATACACCTATCTAATATCGTTGGAGCCATCTGCTAACTATTACATTCCTACAACATTTACCTCAATGTACAACTCCAGTCCAAACAACAAAATAGCACATTCACTTAGCTGGAAATAAAATCAAAAAGAATCAGTTATAGTGGTGATATT
TRINITY_DN27719_c0_g1	ACGGTCTTGACGACCAGCTGCTCCTAACAGTCAGATGATATTTGAATAAAACTTTTGCGAACTTTTAACAAATTCAATCTGTGTTGTAGGAACGCAAGTAATTCCAATGTGATAGCCATTTCTCAATCATGACCTGTAGTTCTATAATCTCCAACCAGGGAAATAGCGTTTCAGCATCTGTGCTGCCAAAACCTCTATGAACTTGATATGTTCCAAC
TRINITY_DN27728_c0_g2	TTTACCTCGCATTAAGTTGATCTTTCTCTACAATCTAACTATGACTGTAACACTATATTCTGCACTCCTGTTTCCTTCTCTATGAATGGTATATTTTGTCTGTGTAGGGTGCAAAAAACAATATTTTCTACTGTATACCAATACATGTGACAATAATAAATCAAATCAAATCTGAAAGATGGCCCCTCTGATAGTGCAGTTCTCCCTCAGTTCTGCCCTGGAAACACAGCCCAGACTTAGCATTCTATTCTTTAGTGTGGGATTTAAACCCAATGCCTACTGACTCACAGGTGCAAGTGCTACCCATTGCTAATGAATGTTAATCTGCTGCAGTTAACGGAAGTATTTGTCATTTGTTCAACCCTGTTACTACTGACAAGCTCGCATGTTCACAGCTCA…
TRINITY_DN27728_c0_g3	TTTGTCTTTATAGCATGCAAGAGTCAGTACTTTTCACTGTATACCAATACATGTGACAAATCCAAAAAAAACACAACACGTGAGCCTGCAAATCTATATTTTTATGATATTGGTATTACCAAAATAAGTGATCAATCTGAAGACGTCTCATTTCCTTAATTCGAAGGGCAATAATAAATCATAGTTGTTTGATTTAGCTGGTCGTCTGCCTTGAGAAAGTTGGATTATTTTTTGGCAATGGGTGATGTCAAGTTTAACTAGGAAATTAAAAATAGTTTGTGTTTCACTATTGTCCTTAAAATTTATATACCATAATTGTCAGGTTTTCCTTCAGACTCAGCTTATCCCTGTAGATGCCACGTTTGAAGCATAACATGTACAGTAAAAAGAAAGTTCACT…
TRINITY_DN27728_c1_g1	ATCTTATTGAATGGCAGGGCAGGCTCGAGGGGCTAGATGGCCTATTCCTGCTCCTATTTCTTATGTTGTTAGGTTCATTCAAATGGAAGTTGTTTTGCCCTCACTTCTTACCGAGCAACATGAGATTGTTGTTGATACTCTATTATCTCAGAGATTTCCAGAGCTAATAACAAATCATAGAATTGTAGAATCCCTACAATGCAGAAAAAGGTCATTCAGCCCACCGAGTCTATATTGACTTTCTGACAGAGCATCCCATCGAAGCACTATCCCGATGGTCTTTTGTATTTGCCTCACTAATCACCCTAAACTACACATCTTAGGACACTAAGGGACAATTTGGCATGGTCAATCCACCTAACCTGTGCATCTTTGGACTGTGGGAGGAGACCCGGAGCG…
TRINITY_DN27728_c3_g1	AAGATGTGTAGGTTAGGTGGATTGGCCATGCTAAATTGCCCCTTAGTGTCCAAAGATGTTGGATAAATACCAGGTGGGTTCTCTAACTGCACCCAAGCAAGACTCGTGCTGCAGAAGCTAACAATCGAATTTGTGATGTCTATTTTAACTGTTTAAATGGAAAAAGCTCTTCCACAATGCTTCAGGAAGTGTTTGATCGTCTATACATGGAGGCTGCTGTGTCCGAGGGGTTGCAGTGTGCGGGAGGCTGGCTATATGGGGTATGCGGAGAGTAGATTATAAAGTGTTCCTTCCCCGAAGCATTGCCAATGTCCCTCCGTGCTGAACTTACTCTGCTACGCGTGAAATGGTTTCACTGTGCCCCTTGTACACAGATTGGTTTATTTTATAGTTTGCACT…
TRINITY_DN27766_c0_g1	GTTCCGTTTTGTAGGTTACCATCACCTGAACAATTTTCAAGCATTTCCAATATATTCATTTCCTTTATCAGCAATGTAAGCTAATAGGTAAGGACCCAGCAATCTAATTACTGCTAGCAGCTTCACTGGGCTCTGGTTCCTGGGAAACTTCCTCGCTGGTTTCTTTATCTTCCTTGCTTCGCTTAGATTTCTTATGCTTGTGTCGTTTGTGGCCGTCCACTTCTTCACTGTCATGGCGCCGTCTGCTGCTGCTTCTAGAAGATTTGTGTCTCCCCTCTTCCTTGTCCCGGTGTCGGCGTTCTTTGTGACGATCTTCTTTTTCCCTGCTAACTTTGTCCCGATGATGGTAATCACGATCGTAGGCTTTATCCGATGAGTAGTCTCTGTGCCGGTATCGAC…
TRINITY_DN27759_c5_g1	GTTTCTGGATATTGCCTTTGTGATCATTTCAATCAGTACCTGTTTGGGAGAGAGAAAGTAGTGGTAGAGTCTGACCACAAATCATTTCAAAGCATTTTTCTTAAACCACTTCTATCTACTCCAAAGGAAGTTATTTTGTTTGCAGAGATATTGCTTGGAAGTGAACACCTGAATGTTTTAAAGATTGAGCAGGATTTTCTGGCCACACTCGCCCCAAGACTGGAAAATCTGGCCTGAGGTCAACAGATCTTTGCACGGTCTGCCCCCATCCGCTACGATTACCTTGGCAGGCGGAACAGGAAAAATTCTGCTCTAGGGTTGAGATGTTCCCTTCTTGCCAGTATTGTTGCAAATGGCACAGGAAAATTTGGAGAGTGACCACAAGTCAACTTTTGACTG…
TRINITY_DN27720_c0_g1	CACGATGTTGCGCTGACCAGTTAAAAAACAATGACCCACTAATCTAAACCAATCCCTTTTCGTCCATAAACCTATCCATGGGTCTCTTAAACGTCCCCAAACGCCCCCTCTTAAACTTGATCTTCATAGCCTTCTCTGGTAGAGAATTCTACAAGTTCACCACCCTTTGAGTGAAGAAATTTCTCCTCATCTCAATCCCAATGCCTACCCTGTATCCTGAGACAGTAACCCCTTGTAGTAGATGCCCATATGGAAATCAACACACTTCTACCCCACCTTACCACAACCAGAGGAAATGATATCAATGTATCCAGTCTATGCAAAATTCTAAACATTTCAGTGAGATCCAGTGAATACAGGCCTAGTCGAC
TRINITY_DN27790_c1_g1	GCTGATTACAGTCATTGAGGTTTACAGCATGGAAATCAGCCCTTTTAAGGCACTAAGTTAGTCCCAATTGCCTGCATTTGTCCCATATTCCTCTATACCCATTCTACCTAACTATCTACATGCTTTTTAAAAGACAATATCGTACCCCCCTTCTATACTACCTTCTGGACGCGCGTGCGGGAGGCTCGGCCGAGGAAGCTACTGCCGGGGGCCGGCGGTCGGCGATGAATCCTTAAATTGCTGCAAGAGGAAATAATGACCACAGATACTGACACTGTTTCTGCGAAAATTCCTGCTCAGATGTCTCCAGCGCCCATAGAGGAAGATGGCGTCTCTGCAGGAGAGAATTGCGGCCGCTGGCTGGGTTTTTGGTATGGCTGGTGGGTGTGTTGGTGGGCT…
TRINITY_DN27790_c5_g1	AAGCTCATCCTGACTGTTTGATGCTGAACTTTACTGTGAAAGTATGACCAATCCTGTACTGATATTTATAGTATTTAGAGCACAGAAATGATACTTCAACTTATAGTATTGATTCATAGAGTAACTGTCTAAATGTTTTTTAAAAGGCAAAATTGTATCCGCATCTACTACTACTTGTTGAAGTATTGAATTCCACTTTCAAAATGTGCACTGGGT
TRINITY_DN27723_c0_g1	CACTCCCCCACCCCCAATGCCCCTCCACAATGACACGGAGGGAGACTCGACGAAATGAAGAACCTCGCTGACCTCACCCTGATGCATCGAATCCGGTTCTCAACATGAAGGACCCGCCTCAGCAACCTGAGCTGAGCGACATTCCTTCAGAAAGCCTGGCCCTGTTTCCCACTGGATTGGAACAGGATGGGAAGCAGGGAAACCTCAACGAGGAGACACGGTCGCTGCGGCTCTCTGGTCTGTCCGGATGAGGTTCTGTCCAGGCTTGAGGGAAGGAGGCACCCACTCGCTTTAGCACCTCTGCATGCCCCCCCCCCCGCCCCTCCCCCCTTCCCCTTTCCCTATCCCCTTCCTCACATGAGATAAAAAGATAGCTGGGGGGAGGAGGGTGGGGTTTGG…
TRINITY_DN46183_c0_g1	CTGGCATATAACAAATATGGTTACTTTTGTTAAAGTAACATGAGAATGTTGCCTTAAAATCAAATAGCACCATAGATGAAAGGTGAGGTATGATGATTTTTAAAAAAAAAGATGTCCTTCATTAATGGTTAAAAGTGACCAATTAACATCTGACTGAGTAAATAAATTAAAAAAAACTCTTCCCAACAATAAAGAAACGAATGGTTAGAAATGTTAAATGACATTTAATACTGTTTCATTGGTTAGCATAGCTTTTCAATGGATAATCAGGGAGCAAGAAACCCCTTTATGGACCTCCCCTCCCCCGCCA
TRINITY_DN46138_c0_g1	CCTCGATCTGAGGGTCAAATCTTCAAAAGGTTGTAATGGTCTTCAAGGATGACACGTTTTTCTTTTATTCAGAATGGTTGCATCCATTGCAGTTCACTCAATGGTAAAATATATAACAGTGCTGTCACAATGTGGACAGATGTTCCAATAAAGGTCCAGTTATGCCCCTGTACATTCCTACTGTTCACCCACAAACTCCAATTAATGAACCAAACAAAAATGAATACTGTCCCTAGATTGGCCCAATACCCTCTATCTGTGGACAATAATGTTTCAAGAGTGTATGTGTTAACTCACTCCAGAACTTGCATCGAAGAACTTTGAAACGGTTTGCTGTATTTGTTCTTTTGAACACAAGTTTTAAGTTTAAAGGAAGCTTCAGTGA
TRINITY_DN46159_c0_g1	TATTCTACCATGATTTTTTTTTAAACTTGAAACATTAAGTCCACATCTCTCTTCGTGAATGCAACTGTTTACTGTTTTTATTTCAAAGTTTCCAGCATCCAGTTTTTCTCAAGATTGTAACCTATTTCTGAGTCAAGCAGTGGTTTGCTGGGCTTCTCATCAATTGAAGCCAAGACCCAGGGATCTCCAGACATATCCTACTGTTAAAGAACAATCCAAAGCCATTCAGGTGGATAGTCATCTACCGATTTGCAACAAACCCTGACCGTGGAATGACCGAGAATGGAACTCAACATATGCATGAATGGATTCACAGGAAGGGAGCCAGTCCAGTTGCCACATAATGAAACCGCAATTTTTTTTCCAGGTCTTGGCATATGGACATGGATTGCAAGAAAC…
TRINITY_DN46140_c1_g1	GTTACTTTGAATCTATGTAAGCAAACCACATCTTTTCTTTTTGTTTAAAGCCCACAACCCCTAACAAATTTAAGACATTACAAGAGGAAAATTGGTGACAAGGATGGGATTTTGTTTCAGCGAGAACATCAAGAAAACATCCTAAGTAGAAGAAAAAACATTGTGAGTCTTCACACTTCAAACATTAGAAGGTTGGGGAGAAGTAACAACAGAATTAAAGATGAGAATACCAGTAAAGGAAGAACGAGTAAGAAAAAAAGTAATTTTAAAAGAGAGGCTTCTTCCGATCAGCAAAGGGTGAGATTCCTAGCAGTATCTGGTATATTTGAAAAGAAGGGATTCTTTTCTGTGCAGTTGGTTCATTTGAAAAAAAGAATACATCAAGTCAACAGACTTCAG…
TRINITY_DN61417_c0_g1	ATAAATACCAGCATGGACCAACTGGGCTGAATGGCCTGATTGTGTGTTGTAACTCCTCTGTAATAATTCTCTACACAGGCCCTGGACCTGGTAAGCATGGCACTAGCATCACCTGCCATCCACATTCCCTCCCCCCGTACAGCAGCCTCTGAGTCAGATGGTCGCAGGTTCAGATCTCCCCCACAGCAAGCTAAGTGCTTTTCTCAGGCTGACACCAGTGTTGTGTTGAGGCAATGCTGCACTGTCAAGAGGGTCAGTACTGAGGGAGTGCTGCACTGTCAAGAGGGTCAGTACTGAGGGAGTGCTGCACTGTCAAGAGGGTCAGTACTGAGGGAGTGCTGCACTGTCAAGAGGGTCAG
TRINITY_DN68825_c0_g1	CTTGGTTGGATTTGTTTTCTGCACACCAGTGCCACTTCACCAGCAGGTAGCATGTGTATGCAGAAAATGCATCCTAAGAGAATCACCATGGTGATTTGTACTCAACCAGACAATCAGGGCAACACAGCAGCGACAAAGGAGGTGCCAGTTCTAAAGGGAGACTTGAGCCTAACAAAATGACACACATTGAAGGACCAGCCATTTTCTGTTT
TRINITY_DN68888_c1_g1	CCGCCATGCCTTGGCGGGGGAATGAGCAAACTCTAGGTTGCACGCAGAATGTTGGTAACAGCAAGGAAGTTTCATTAAATTTTTCAGAGATATGATGCATTCGGAATGATGTTTAATCAGGGGAACTACTTATATTGACATTTGTGATTGTTATTCAGTAACTAACCCTCATTTGGAGCAAGGACGCATGTGTATTTAATCCGCACTCCTTGGGGTTGCTAAGATGGCAGAAAATGGAGTGGCTCAAGAAATAACTCCACTGGAGAAGGAAATATGCG
TRINITY_DN99665_c0_g1	CAAAGGAACAGTCAGCAGGGGCAATGATCCAATGCTGTCAATAGCTACAGCCAGCAATGTCCTTCGCTAATATGGCAGGTACTGAACTACTACATGCAGTTTTGGAAGCCTTCATCCTACTTCCCGCTGCTCTGAGAAGTATCTGCTGCTTGGTCTGCCAGCGGCCAGGACATATCAATCACTCGAGGTGATGAATGGGGAATAGGTCATCATCACAACCTGCACTAAATTCAAATTCAGCAAGTTGCAGTTACCACGACTCCTTAGTTTGCACATGCCCTTAGGAAGAAGGGACAGTTTTCAGTGGTTTTGTTTTCACTAAATTATATGCAAGTC
TRINITY_DN99623_c0_g1	ATTAATTTGTTTAAGCTACGAAATATATTTGTCGAGGATCTCCAGACGCAGCAGAACTGATTATAAAAGCCAGACTCCCAATACGGTAGCGATGGCACATCCAATAGTAACCCAACGGCACCGGAGAATTAACATTTAACAAATCATTTCACGTACTCCTTCATCGGCTGGAATCCAAAGTTGAACCCTTTTACTTATTCCACGCACTTTAAACAAAAATAGAGAGGAAAATACTCCACCCATTTCGGATTTACAATAAGAGATGCAGTCAGAAGACACTGAAACAGAGAAACGATGTGTGTTTGCCTATCAAGCGGAATGGTGAGCAGAAAACATAAAGGGGAAAAATAACGCCATTGATAAATAAATTTTCCTTGGCGGTGGCTATTTACACCATTA…
TRINITY_DN99655_c0_g1	CAGACTTTTTACTGTGTTTACGCCAGTCCAACGCCGGCATACCCACATCATGGAGCGATCACCCGCCTTCATCAGTGCCTCAGCTGTACTCAAAACTGATCCAGAATTCCCTCCCAGTGGGCACTCCTTTGAAACCTTCAAATGCCACTAAATGCCACTAAACACCTCGAGATGGAGTTTCTGCTAGCCACTGTACCACTGTGCTGTCCTTACCTGGGTTCGTACTGATAAACACACGGC
TRINITY_DN99622_c0_g1	GGGGGGGGAAACAATGAGAAAAATTGGTTTTGAAAAAAAAATTGCTTTCATTATTTCATGCATTTCAGAAACAAAAAGAAGGGTTGTTGTTTTTTATAGAGCTGTGGCGTTGCAGTTTTAGTGTGTAACATATTCCCTGCACTTTGTGCAACATTAAAATGGGGTCCAAAGTTCAGTGGCTGGAAGAGCGGATGGATAAACCGTGAACCCTGGAAAATGTGCCTAGTTAGAATGTAAATAGATGAACCGGGGCTAGGGTTTATCAAGCAGGCCACTTTCTACTGCAGAAAGTAATGGTTTTTGCCGATTTACTTGCACTTTGGCAGAGAGAGAGCACTTCAGCTCCTTGGATGATGTGGGGAGAGTTCAGGACGAG
TRINITY_DN99629_c0_g1	TAGGGTTATGTTTTTTTAGTGGAAGAATTGAACTACTATTTGCAGAGACACATGATAGTGAGCAGATATTCTGATTAAGTAATGGCACGGCTTTTAAAAATGTTTACCATAGTGTGTCACACAACTGTCTGAGGGAACGTGCAAAGTTTAAATTCATGTTTCTTATAGATTTCCCACATGTTATATTGTTTGTACTAACACAACTTTATCAGGAACTCAGCAGGCCCCCAT
TRINITY_DN99620_c0_g1	ACGCTCGGTACTGACATTCAACCTTTGTTTCTGTGCAGTGATTTTCAGGTCTTGCAATAAAACTCCTTACATGTTTTATCTTTCACTTAAGACTCTTGTGTTTTAATCAATGGAATGATATTCAAAGCAGTTCAAGCTAGCGAATAATAGATAATCGTAAAATAATGGAATCTGTGAGGAACTAAAGTTTAATTCAAGCCCTGTATCGAATATTAATTAGTCATAATTAAAGCGATAAAGTAAAAACAAAATCAATATTCGTTAATTTTTTACCCACCCCAATAACAATGACAATGAGATACCGTATAGATTTAGGGCACTTCATAAAAATAAAATGACAATATTACATACATTTCAAAATACTATACCCAATTAGTAGTTGGCATTTGGGGC
TRINITY_DN50944_c0_g1	CATCTGTCCTTAATGTAGCTTTAAAGATCGTTACTCCTTCAAATATTGAAATGTTGGTGAAAATGGTGTAGGAGATGCAAAAAGACACTGATTATTTTTGTGGTGCTTTTCAGACAGAGTGACTCAAGGCACTCCAGAGAGAACTGGGCGTTCAGGAGGTCAGAAGTTTGGTTGGAAAAGAAATTATAGCAAAAGGCTGACTTTTGTTCATCAAGCTCTTTGTGATAGATACTCCATTGTATACTTTGGAATTCATTTTTGTCTACTCCCTTGAAAAATATGCTGAAACTAATTCATTTTAATAAGACAGAGGGGATTCTGGAATGATTTACTTACAAATAATTTAAATTACATGATGGATGCCTTATAGAGTATTACAAGTCAAGAAACAGATTAGAT…
TRINITY_DN95831_c0_g1	CAAGCTGATTGGAGTAGGCAGAGCTCCTCCTCCAAGGCTTGATCTTAATTGCAAAGTCAACAAAAAAACTACGTATTGCGAAATAGACTATTAATAGCACTCAACCAAACTCAGCAGACATTGTTACATAACAAGGTCAGTCAGCAATACTGCTTTGCACGAATGTTTTAGACTAACTTGGGGAATCAAAAGGAAAGTTCACTGTAAAACAATGTTTCTAAGAAGGTGGCAACTAATTGTCTGTATATTCCATTCTGGTAGCAGTCTGAAAGTATAAATATAGTATTATCCACGTCATTACCAACCACCCGGTTCTATTTGTTTCTC
TRINITY_DN95829_c0_g1	GTTGGGTGGCGGGGCGGGCTCGAGGGGCCAGATGGCCTACTCCTGCTCCTATTTCTTATGTTCTTATATTAGACATACTGCAACATATAAAGAAGCCATTACCAAATTCCACTTCCCTGTTTGATCCCAAACCTCTTTTACTAATTCTCACTCTCTGAAACAATTTCCTTTTTGTTTTGAAACTAATTTCTGGACACTGCTTCCACACAATTTATGACAGAGCATTCTGCATGACTCCCATTTAATTTGTTTTGAGATTATGTTAAATCTACTCCACTAATCCATTCCAAATCTTGTCACTTAGCTTATTTCCTTTCTTCCTTACCCAGGTGGTGTGTATTTTCCAAGTATGGAGTACACTGTGGTAAACTCCACTTAACTTGACCCTGAGATCTAAGT…
TRINITY_DN95870_c0_g1	GGGGCTGTCAGGAGACCAGTGATCGGGAAGCTGGTAATGCGGGGCCATTGCGCATGCACCGAGCTCTGCATTGACAGATCGGTGTACGTGTAGTAGCCCGCTCTGCGCTATGCTGCTGACCCATCAGGCTAAGATAACCCCCAGCCCCTGATTTTCAGTGTGAATCCTGCTAGGGCACTCTCTGATGCACTCTGGAAATCATGCCAAAAAAACCAGCGGTATTACTCCCATGTTGCTATACATTGGGAAGTTAGAATTTTTTTGGGAGAAGCCCGGCCTTGGTTTTTATAATTGTGTTTATGATTAGGGCATTACACACAGCGAAATATCCCACCATCATAACCCCCCAAACCCCCTCCCCCAATTTGAACTCGGCATCTGTATACAGTGTATCAAAGG…
TRINITY_DN95854_c0_g1	CCCATAACCCAATAGCTGCATGATCACTTCAGATGGCACCTTATATGTTAGGAATCGGAGCTATCTGGTTCAGGGACCTGAACCAGTCCCACTCACTGCCACAGAGACTGCTGCTGATTCTGCAGTCCACGACTCCCTTACCAACTGTGACAGACAGCCTTCCTACTGCCAATGTAACAAACCCGATGGTCACCATGCGCACCCCAGACTCACTTGTGCCAGCCACTGTATGGACAATTACCAGGCTGCCTCCGAGGGCACAGCCAACTGGGATGACCGCACTCTTGGGGAGGCTGAGCAGACCAAACCCAGAGTTTAAGGACCATGTACCTACCTGAACACATACATGATCCCCGTCTGAAAAGGTTACAGATTCTTCTAATGAAACTGGGGCAGATG…
TRINITY_DN95846_c0_g1	CTATCTTTGTCTACAATTAGCCACAGAAAAGAGTAAGGTGACATTTATCGTGCATGACTGAGAGTGCTGTGCACTGGAATTGTGAACTGTAATTGAATTAAAACAGCTGATTATTGCATTGTCTTGTGTTTTCCTTTTTATTCTCCTCTGATGTCGAGCCCCCACCCAATCACAAACTATAACCTTGATCTCCTTGAAATATTGGCCCATTCCGCAGCAAGCCATTGCTTCAATCTGATCATGTATCAGGTCATTTACAAATTGCCATCTAAATGTTTAGTGAGAGGACATGCACGAGCCACTAAGTGACCCCTTACCTGTAATTTCATGTATCTGAAAACGTAGTTAATTTTGCACATTCCTATTTCAGTGTATTATCTTTAATGTTCAAATGAAATT…
TRINITY_DN95867_c0_g1	CACACCAAACACACACCCACATCTCCCCCCAACACCCCCCCCGGCCCCCCCGCATCTCCCAAAACTTTGCTAATTTTTCTATCAAGGTTTACAGTTGTACGCTGATTGACTGAGGTGTGTGTGTGCTGGGCAGCTCAATCCTGCACCCTGTGTCTACAGCTTCCCCATTCCCAACACAGCGAGCTGCTCATTGTGAAGTGGTTTACGTTTTAAATTTTAAACTTGAAGTGAAATGACCACAGCTGGTAGCTCAGCACGGGGGTGCGTTCTGCAGTCAGGTATTGTACTGTGACCCAGTGAAGGTGGGAAAGGGGGTATTCAATGGGAGTGAGCCGGTTGGGTGGTGGGATTGACCAATTCTTTCTCTGTCGCCCCCCCTCCCCACATAAACCCAAATGA…
TRINITY_DN95837_c0_g1	TCAAACCCAGGTCCCTGGTGTTATAAGGCAGCAGTGCTAACCACTGTGCCACCATGCTGCCCATTGTTCGAAGTTATTGTATTACTAAATTATGAAATTGCTGCTGAATTTTTATCCTGCTTCCCTTAATCTCCTTCTCAGAAAGATTCTGCATAGTGGGAAATATGAAACACACAGTAGATAAACATGACAGGAGATCAAATTGCAGATTGAGCTTCCCACTTTGCTGAAATCACAAATTCTCTTGAATTCATCTTCAGCAGCCCACAGCCTTTACTCTTAACACAAAAAATTAGAGCTTGTATCTGAATATCGAAAATGGAAAATTAAATATTCTGGTCATTTATTTGATCTCAGTTTGTGAAGTTCTGCTGTGTGAAAATTAGCGACCGCATTTCC…
TRINITY_DN95883_c0_g1	CTGGCTTTTGGGGTTTGCCCCTTCGTCGGGTGGGTGGAGAGTTCTGGCCTCAGACAGAGTATATAAAGGTACTGTGTGTATTTACACTGTGTGCCTTTACATGCTTTGTTTGTGGGCAGGGCTTTCCACTCGCCTGCCGAAGAGGGCGGACCCCAAAAGCTAGTGGGTTTACCACCAGATGGACTTGTTGGACTTTAATCTCATGTTGTGAGATTTCTTACATTGAAAATCCTACACAACTTTTCCAGAGAGAAACATTTGGGATTTGTGTTCACTAAGTTTTGTAAATTTATGCTGTGCAGTCTTATTTGTTTAACTTCTGTTAAAAGTTGTTTGAAATTTGTACATTTTAGACTATGTGTGAGAAATTACTTCACAATGTGGTCTTGCAGGAATAAA…
TRINITY_DN57180_c0_g1	GGGTGGGGGTGGTGGTGGTGTGGGTCAGAAGACTGCTTATCATGTTTGTAGGCGGAATAGCAAATGTATCAGCTGAGTGGCACTAAAAGGGTGCCTCTGTGTTCCCCATCGAAAAATCCATGTATATGTTAATGAAATAATTCTCTCTCCCAGAGATTTATTATCTCACTCACAGATTAGACTTCAACACTCTCATCTGAGTTTATTGTGTCTTGATTAAGCAAAAAAAGACATCAGTTGCTTGTGTATATGTGTGTGTGTGTACATGTTTGTGTGTGTGTATATATATACATATATATATAATATATTTTGTTTGTATAAAGTTTTAACATCAAAATTAAAAACCAGCTGTAAAACGG
TRINITY_DN57190_c2_g1	GTATGGGCTGTGTGAGATTGTGATCAGTGCAGACTCAATGAGCCAGTGGGCTGTGTGGGATTGTGGTCGGTGCGGACTCGGTGAGCCGAATGGTCTCTTTCTGCGCTGTAGGGTTTCTGTGATTTGATCTTAGCTAAGCAATGTCACAGCCTGGGTAGCCCTTTGCAAAACCCAAATTCTCTCCTGTTCTCCAATTCTAATTTGTTCAGCCTTTCAAAAGATAGATCATTAAACTGGAATTGGAACTGAATATCATAGCTTGAAGTCAAGGAGCTAACTAGTGCACTACTTGACGAGTTACTTTAATCTGTACCAACGTGTTCCATCACATGGAGCACTGCCCTGATCAGCTTAACGATGGATGGACGTTACCCAGTTTGTCCCCTTGCAGTGTCACTC…
TRINITY_DN57190_c2_g4	AAGGAGAAGTTTAAATACAAAGAAAATTACAGCACAGGAATAGGCCCTTCGGCCCTCCAAGCCTGCACTGATCATGCTGCCCAACTGAACTAAAATCCCCGACCCTTCCAGGAATCATATCCCTCCATTCCCATCCTATTCGTGTATTTGTCCAGGCGCCCCTGAAAAGACACTACTGTATCTGCTTCCACTGCATCTCCCAGCAGAGAGTTCCAGGCACCCGCCACCCTCTGTGTAATAAAAACTTTTAAGCGTTAAGATTGAGGAAGGAAGAGATCCATTATTTTTTAACTTGAGCAATTAAACTGAAATGTGAATGAAAGCTCGGAACTTAGTCTACGCGTAAACATTTTCAAAGTATTTCATTGCTTTGGGATGTTTCTGAGATATAAAAAGGTC…
TRINITY_DN57185_c0_g1	GCTATCTCAAAACTGGCGTGATCCTAAGTGGTCACAGCCAGTCGTATGCGGTCCAGACACCAGCACAGCTTGGGCCAAATTGGAACACACACAATGGAAAATGGAGTTTGTCAGCAATTTCCTGACAGAAGCCACCAAGTCTGAAACAATTTCCCCCTCACCGGTGATAACTCTTGGGGACACCAGCCCCGGGAGTCAGAGCAGAGAATGAGAGTCTCTGCCAGTCTGGCAGCCTCCGTGGAGACAGAATAGAGCCAACGTTTCGAGCCTGGATGACCCTCCGTCAGTTTTGGATTCTATCATCCACGGTATTCTGCGCGATGGAACAGTGACGTTGGTGGCAATTATTGTGCGAGTTTGAGAATAAAACGTTCCCCCCCTTCATCTGCAGTTTGGGAC…
TRINITY_DN57122_c0_g1	ATCTCGAGTCTGGCAGCATTTGCAAGGAGAGAATAGAGTTGACGTGTCAAATCCAGATGACCCTTTGTCAATGCTGTCCATCCTCACCCCTATTGGCCATTTCGTCTTCACCTACACCTGGGATTCCTCTGATGCTCTGCATCATATTGACAGCTTCTAGTTCCCAGACCCTAACTGCCACCTAATCACCATGGATGTGCAATCTCTCTACACCTCCATCCCACATCAAGATGGCCCAAGAGCTCTTTTGCTTCTTTCTTGAAAAGAGGCCTGAACAATTCTGATCCACCACCACTCTCCTTTGGCTGAACTCACACAGTAAAAAGTCTGAACTCACACTCTCAGCAACCTCTCCTTTAATTCGTCCCATCCTCTTCAAATCAACGATGTAGCAATGGG…
TRINITY_DN57106_c0_g1	GCTTGGGTCACTGTCTGTGTGGAGTTTGCGGGTTCTCCCCGTGTCTGTGTGTGTTTTCTCCGGGTGCTCCGGTTTCCTCCCAGATTCTGAAAGATGTGCTGGTTAGGTGCATTGACCCAAACCAGTTCCGGAGTGTGGTGACTAGGGGAATTTCACAGTAACTTCATTGTAGTGTTAACATAAGCCTTACTTGTGACTAATAAGTAAACCTTA
TRINITY_DN57106_c3_g1	GGAGTTTGCACGTTCTCCCCGTGTCTGCGTGGGTTTCCTTTGGGTGTTCCGGTTTCCTCCCACAGGCCAAAGATGTGCTGCTTAGGTACATTGGCCGTGCTAAATTCTCCGAACAGGCGCTAGAGTGTGACGACTAAGGGATTTTTCACAATAACTTCATTGCAGTGTGAATTTAAGCCTACTCGCGACATAATAATAAAACAATTCTTTTTTATTCA
TRINITY_DN57106_c7_g1	TGGGGATTTTCACAGTAACTTCACTGCAGAGTTAATGTAAGCCTACTTGTGACAATAATAAACTTTCAAACTTCATGGTGCAAAGTCATTTCTGCATTTTGTTTATCATGTTACTGCATAGAAGTTGTGATTACATTATAAGATGTGCTGAATTTATGAATCAAGGTAAATGCAAGTTTTTTGTTATTCTCATCTAGCCCCCATTCTGAAATGTTATCCAACTGATTTGTATGATGACTGAAATAAAAATGAAGTTTTACTTTATTGTTCAAGAAAATACTGCTTTTAAGAATTAGAGACAACTCAATGCTGAGAGTTTATTGGTCATGTAAAACCTTTTATTGTATATTTTGAATACTACATGTGGATTATAACAATAAATATGAATTTTGTATGATG…
TRINITY_DN57129_c0_g1	CCATCTTTGATATTAGGAAATACAGTTTGTTATTCTTTTGGGAACAGACTGGAGTCACAAATGAGCAGTCATACAACTTGTACAAACTGTTTGCAGCTTATAAGATGCTGATACAATTTCTTTTAGGCTTTTGAGGAGATATTCTAGAAGAGCATAGATACACCAGTCAGTGTTGTACACAAATGAGAAATCCACATTTAAGAAAGAAAAATGAAAATTCACAATTTATCCCTTCCAATAGTTGGTGCTAGAATGTCTCTTCCTTGGCTAGGTCTGTACAAGCAGAGCTTGATGAAATGTTTGTATTTTAAATTATACTGTTTCAGCCACAGACATCAACAAGCCGTGCCAACAGTAAAAAGATCCCAATTCAAGATAAAAGAGACCTCTAACATTAAA…
TRINITY_DN68626_c0_g1	AACCCCCATGACTTGCTTGGACTTGCAAAATCTCACTGTCCTGGCTTGAGACAATTCACACCTCTAACCTGTAAAGATTTGATTACTTATTAAGACTCACATTCCAATAATTAGCTTGTAATTGAGTTTGTCTCTATATATGCTCTGGGAACCAAATCCTCCACTCACCTGATAAGGGGTCTGTGCTCCAAAAGCTTGTGCTACCAAATAAATCTTGTTGCGAGACTGCTTACTGTGCCTATCCCAG
TRINITY_DN68679_c0_g4	CACACACACACACACACATCCCCCAATCCAATTTGGTTTGAATATAGAAAGCGTCCACACTTGAGGTACCAGAGGGATGCTGGCACCCATGGAACTCTACCCCAGAGCTTTAAATCAAGCAGTGAAAGAGGGTAAGCAAAAAGAATTAAGTTGAAGTGAAGGAGAAAGGATTGAATTAGTGTAATGAACATGAAATATTGAGTAAAATTTACACTAGAGATTTGTAATTATGGACAAAGAACTGCTAACTCATTACTGAGTTATAAAAGGTTCATCCTTTTCCCCTCATTCTCGTCCTCCCCTCTCCCCAGTTGTTTTATTACATAACATTTTTAAAAATGTTGAACAAGTTGTGCTTGTGATGGGAAATGTGACTATCACACATTTTTGAACCAAATT…
TRINITY_DN60668_c0_g2	GGGGAAATAGCCTCTGAGAGTCCACCCTATCTCTGGGTTTTGTCCCCACACATACACTCAATCCCACTCTGTTCTCTCCTTTACACAGTCTCTCCCTCTCACACACTCTGCATCACATCATATACTCTTCTCTCACGCACTCTGTCCATCATGCGCTGTTTTCTCTGACACACATTCTCCATTGCACACTTTTTCTCTCCACCACACATACTCTCCATCCAACTCTCTTCCCACTGTCTCACACACATACTCTCTCTATTGCACACTGTTCTTTCTCTCTCACACTCCCTCTATTGCACCCTGTTTTCTTCTTCACACACTCTCCAACACATCCTGTTCTCTGTCACTCACACTCTGTCGCATGCTGTTCTCTCACACACAGTCTCTCCATCCCCTCAC…
TRINITY_DN60645_c0_g1	ACTGGTGTAGGCACAGGAAGAAATCTCAACACCAGGTTAAAGTCTAACAGGTTTTTTTGGTAGCACAAGCTTTTGGAGTGCTGCTCCTTCATCAGGTGAGTGCCCTGATGCCATTTATAAATATTGTGCATTTATTTAGCAACCATCACAGGAGTAGGGAGATACTTTGGTAGCAGTTTAATCTACTGCATATGCTATAAATGAAAGCAAAATGCTTGAGAGCATTTCTAGGTTTCTGCCATTGTGCATCTCAGAGAGCCCCATGGAGCAGCCAAGAGTTTAAAGTCACGTTCCCATTAATTTTTTACATTTCGCAATTTGCAGCCCATTGATTTTGGATTATCAGTCAATGAAGGAACAGCTTCAAAACAGCCTTTTCTAGCATTCAGATCTATGGGG…
TRINITY_DN60632_c0_g1	GTTTTGAACCGTGCGCGGCCAGAGACTGAGAAGAAAGAGATGAAAACAATGTCGTGTTTCCATGGCAGACCCTACTCTGGCTTTATGCAACAGAGTGCCTTTGGTGATAGTCCAATAGCTACAGTGCCTAGGGAGTGGACAGACAGTGCACTGCAGCCCAGAACTGTCAGGTCTTCTGATAGGATACACGCGGGGAAAACCTTTTCAGCTCGATAAGAAATCTTTGGGCC
TRINITY_DN60661_c0_g1	TCCTCCCCCCCACTCCTCTCTCTCTCTCTCTGGTCTGCCAAGGACAATGAGAACCTAAATCTTCCTCTGGGTTATTGAGGTTGAAGTATTGGGGCCTCCCATTTCCTGTCCTCTCCCTTCGTCATGACAAAATGCCTAAAAAAAAAAACTGGATGAGAATTCTGGAGGAATCATTGTGGACGTTGGGAGCATCCGTGTTGTTGACTTCTTTCTTCCTGTTTTTGGGAAGACCCGACATGTGTTGTTTGCAGTGATGGGAGATTGATGAGGTGGCCAATGGGGTTCCAAGATCCAAAATGGCGACCGGCCAGCTCACCAATCCCTCCGAGCTCTCAGTGACTGTCCGGGGTCGCCAAAACTCCAGGTTCCATCAACCCACCGGTGTTTGGACATTCCCTG…
TRINITY_DN60672_c0_g1	TAAGGAGTTAGAGAAGCAATCTTGATTTTAGCGTAGTGGTGACAGTAGGAAAGAAAATGCGTATTCAGGACAGGAGGAGCTTAAGAATAACAAGACTGAAAAGCTACAATAAAATAACTATGAAAAAGACTATAGAGCAAAAAGGAATCGCATATCAGATGATCAGTTTTCCTTTGTATTCTGTTCTGGGGTACAAGATATACTTACACGATTCTTCATTGATATGAAAATGATATTTAATTTAAAAAGAAATTGGCTGGTTACTTCCAAGTTTGGTAAATGTCATGTACACCCATCCAATGCTCTTAATAGCCACTGTTAATTCCATTTCTGAAAGAGATTCTTGCATTGTTTCG
TRINITY_DN60666_c0_g1	GTCTGGGTGGGATTGTGTTCGGTGCGGACTCGATGGGCCGAGGGGCCTGTTTCTGCACTGTAGGGTTCTATGTTCAACTGGTGAAGCATGCCGTATGCCTTCCTGACTACCTTATCCAGCTGCTCTGCCATTTTCAGTGCGTGGTGGGTGTGTGCCGAGCAGATCTCTCTGCCCAGCAATACTGCTAAAGGGGTCTGCCATTTACCGTGTAATCCCCAGACCTTCCAAAATGCATTATCTCACACATACCCGGATTAAACCCCATCTGCCGTTTCTCCGTCTCAAGTCTCCAGCCGGTCGAATAGCTTGCTGTATCCTTCAATGCATTATCTCACACCTATCCGGATTAAACCCCATCTGCCATTTCTCCGTCTCGCTGTATCCTCTGACAACCCTCTC…
TRINITY_DN60666_c4_g1	CCACCCCTGACATCCGTCCTATAACTACCACCCCTTAATTTAAAGCTATGCCCCCTCGTGCTAGCTTTCTCCGATGAGGATTATCAGAGGATACAGCAGGATATAGATCAGTTGGAGACTTGGATGGAGAAATGACAGGTGGAGTTTAATCCGTACAAATGTGAGGTAATGCATCGGCGGCGAAATGGCAGATCGAGTTTAATCCTGACAAATGTGAGGTAATGCATTTTGGAAGGTCTAATACAGATAGGAAATATACAGTAAATGGC
TRINITY_DN67175_c0_g1	GGCCTGGGTGGGATTGTGTTCGGTGTAGACTCAATGGGCCGAAGGGCCTCTTTCTGCAATGTAGGGTTCTATGATCTAATCAGGAAGCTGTCTCTACTCCCAACAAATTGTGCCTGAATAAAGGCTATTTTAAGAGGCCAGTTTTCTTTATTCTAAATCACAGGCAACCCTGAAAGATGTAGGTGCCCTAGTTTGGTAACAATTGCTGGACTTTGCTCATAGTTTTAAAATCTATGGGTTGTTGTTTGGGGGGGTTTAGCTCTGAGACCAGGGGAAAAAAGGGGTTTGGAACTGGGTAAAATTAAAGATTTTGTGGATAACCATTAATGTTGGGTGGCACAGTGGTTAGCACTGCTGCCTC
TRINITY_DN69720_c0_g1	GGGGTTACTAATGAGTAGTCAAGAGTTAGACTTTTTTTTGGTTTAGGATTTCTTGGAAACTATCCAAGTAAGTAACCCTCAGAAGTTTCCGACTGTTAACTCAGGGCTGGCGACTTTTTTGGATGGTCTTGGGGAGCTAAGGAATTGCCCATCAGAAGTTTAAACTTCCTTGGCAATTCTTGTGGAGTCTTTGTGTTAGGACCACAAAGGGATATCATAGTGCATCTTTTAGGTGCATCCAATCTCCAACCGTCTAGAGACTGGAAAATCTGAGCCAATATCTTTTCTAATATCTAGATTTTGAAGTTCCTGATTTCCTTTGATTTATCAGTTCAACTACAATTGAAGAAGATACCTTAATTGGGAGCACCAGGGATGTTACTGTACATCTTTTGTTTT…
TRINITY_DN69711_c0_g1	GCCAAAGGGCTTCTTTCTGCACCATAGGGTTCTATGATTCTACGATAATCTCTTATGTAGAAGCTTAGCTCAGAGCAAACGAAAATCCTTCAGGATGGACAAGAGTTCAACAACCAAAATTAGGAAATAAACATGTGTTTTGATGTCTGCTATGACATTTACAGTATATAACACTGATGCCTCGCAGGAATTCTATATCCTCCCCAGGCGTTGACAATCTTTAAAAAGATATTTCAGCTCAAACTGTGCAAACCTGAAAATTACCTAATAGACTATTGGGATATCATGAGTGCCTTTACAATTGTCATATTTATTATGATAAAACATATAGCCAGAAAATACTGAGTTTAAAAAAATTGTAAAGTTATGAAAAGATTGCTTTACCTTTCCCAAGTCTTT…
TRINITY_DN69770_c0_g1	GACGGAGAGCGCGCGGGTTTCTCCCTTTCTGGCCGCGGAGTGGAACTGCGCGTGCGCGGTTGCATTCGGAACTGAACGTGACGGCGCTGCCGACTGTTGCGCTTGCGCGGGCTATTGGTTTGTGGCGGGGTGCGGTGAATGCGCATGCTCCCGGGAGACTGTGCTCGCGGTCGATGTCTCCATGCGCGTGCGTCGGAGCCTTCTGACATTACACACCTCCGCCCGGTCATCAAACGAAACCTCTCAGGTTGATTCCGTTACGTGGCGGACGCCCCAGAAGCGATGAGGATGAGTCGCTGAGTGGCGATGGCGGAACAGGGAGACCTCAGTCCCGTGCGGTGGTGACTGGACCAGAGCGGCGGGCGGGCGGGCCAAGTGAATGGAAGCGGCGGCATCTTG…
TRINITY_DN69795_c0_g1	TGTCAAACTTTTTATTTGTGAAAACATTGCTTTCTTTAAGCTTCCTGAAGGCATTCGGGTCACTTGGGTTCTTTCTGAATAATATCAAGCGAAGCAGCTGCTTCCACTGAGGTTTAACACGACGACATGACACCATCAATCTACTTTCTATAGAGGATGGCTGGCGTACACTTAGATTAACCACGGCCTCCTTTGGGAGAGAGGCAAGAGGCTCAGGATAGTGGAACTGCAACAGGCCAAGTTATGAATCACACTTGGGAAGGAAGTTCTGTAATCTATCAAGAATTTCACTGGATTCTTCTGCGTTAAAGACATCCCTGTGATACGGATGCGGTTAAGAGTACACTGTGTAATCCAGAACAGCTGCGGTTCCAGAGAAGAGGATGAATATCCAGCCCA…
TRINITY_DN18540_c0_g1	GATGGGTTGGGCCTGGCCTGCCTGCTGTTTGGGGTTGAGGGAGTAAATGGGAATGGCTGCTGCAGGGGAGAGAGAGGGAGCCTGAGGCCCAGGGGAGAGCAACAGCACAGAACTAGAGGGACTAGGATACAGAGAATAGATAGACAGAGATTGGAATAGAGAGAGGCTTACAGAGAGAGATAGAGGGAGAGGTTGTGATAATAGAGAGAGGCTGTGATAGGGAGAGGAATAGAGAGAGGAGAGCAAGGAGGCAAACATAGATATTGGGACAGGTGAGAATGAGATAGAGGAAGCTGACAAGGGTGGAGATAACAAAGGGAGAGAAGAAGAGTGAACACAGAGGAAGAGGAGACGCGGAGAGAGGACAGTGGACTCAAAGAAAGAGAAGACGAACAGGGT…
TRINITY_DN18539_c0_g1	TCTGTATCTAACCCTGTGCTGTACCTGTCCTGGGAGTGTTTGATGGGGACAGTGTCGAGGGAGTTTTGCTCTATTGCATTACCCTGTGTTATATCTACCCTGGGGGTGCTTGACGTGGGTGGGGTGGGGGTTGTACCGTCTATAGGTGCCCCAAAAATGCCAACAGTGGGCAGTGTGTGAATGTGACGTTGAGAGGGTGGTTCTGGATATTCAGGATAGGAAGGGTGGGCCTTCGAGGGGGGTTGCTGAATTTCTGGGCAGATCAGAAACTGGAGGGACTGGGTGCAGTCTGGCCAGCCTAGGGCATCACCCTGGCCACTGAAGAGGGCAAAGAGGTCCTGGCACTTAGTTAAGTAGTTGCCCTTGGTAGTAGGGGGCATGATTGCCCAGAAGGAAAGC…
TRINITY_DN18542_c0_g1	ATCCAAATGAATGGTGGAACAGGCTCAAAGGGCTGGATGGCCTACTCCTGCTCCTATTTACTATGTTGACTTTAGGTCCAAAATTCTAGCAATTTCTTGAAAAATTCAGCAAGTCCAAGGTTTGCTCTTGGTCCCATTTCTTTGCTAGAAATAACACAGCAAAATATTTACAAAATTTAGCTAACGCACAAAACTGCACATGTTGGTTAATATTGTAGCTCTGTCTATAACCCCTGAGTTGTGTTTTTCTGTGTTACTGGTTTGCAGTCACCCACTTGAAATGTATTCCACAAGTAATTTTGTTTGTCAAGTTTTCTACATGATGGATAATCTACACCGAGTATACAGCACAGAAGCAGGCCATTCTGTCCAACTCCCCCATGCTGGTCTTTTTTGCCC…
TRINITY_DN18565_c0_g1	ATGAACTGCACCTCCCCCCCCCCAACACACACACACACGCACACATAAATATTCTTCTATTGTTAATACTTGTGTATTTTAAGCTCAATTATTAGGAAGTATTTGGTGAGTTTGTGTGAATGCTCTTGTTAATAAAACAAAAGTAAGGAGGAGGAGGTCATTCGGCCCCTGAAACCTGTTGTGCACTATTCTGCAAAATGGCCACTGATCTGATGCATGCCCCAACTCCATTTTGGTGTGTCACCTCACTGCCTGCTGTGGTCCTGAAACAGGCAGGCCAGGAAGGTTTGAAATTGCACTTTTGCTCTGTGCGTGGAGCTGGCCAATTTTAGCCAGTGCTGCAGTTGTTGGGGAGGGGCCACAATTAGCCTCAGTGCCTCGAGTGACTCCCACCCGTCC…
TRINITY_DN18523_c2_g1	CGTTAAACTAACCGGCCTATAATTCCCCGCCTTTTGCCTAGCATCCTTCTTAAACAACGGCGTAACATTAGCAACATTGAGCTGTTTTCCTTTATTTCAAATTGATCTTCAAATAGGAGAATATTTTTATCCCTATGATAACTAGACATTGAAAAATAGCACCATTTCCTGGCTGAACCTGGAACCGCAGCTATAAAAAATAAACAAACCTTGGACTTTGAAAAATGCTGTTGAGAATCTTGAACCTGCACTGTGTTTAGGACATCTGGGACACTCTTGTGGGGTAGGAGACAGTTGCACCTGATGGGGACAAGGTGAGAGGGGTTGCAGGGGCACCTTCTTCAGGCCAAAGGAATAGGAACCTCTTGCATCCACTTTTCTGCTGACTCTTGCTTCAGC…
TRINITY_DN18523_c4_g1	ACCGATGACTGTTTGACCAAACTCCCCTCCATCTCGATTTTCAAGTTTGCTGATGATACCACCATTGTGGGTTGGATCTCCAACAATGATGAGATAGAGTACAGAAAGGAGATGTGAACTGGTGCAGCAACAATAATCTCTCTCTTTGTCAACAAAATGAAAGAGATAGCCATTGACTTTAGGAAGTATAGTGGAGGACTTGCCCCGTCTACATCAACAGGGAAGAAGTGGAAATGGTCGAGAGCTTCAAGTTGCTAGGTGGCCAGATCACCAACAGCCTGTCCCACTCCCTCCATAGCAATGCTTTAGTTAAGAAAGCCCAGCAACTTCTGTACTTTCTCAGGAGACTGTGGAAATTCGGCATATCCGCTACCTCTCTCCAACTTTTATAGATGCATT…
TRINITY_DN18534_c0_g1	GCCTGCATGTTGTCCCCGTGTCTGTCTGGGTTTCCTCCGGGCACTCCGGTTTCTTCCCACAGTTCAAAGGCTGTGCTGATTTTGTGCATTTGCTATGCTAAATTCTCCCTCAGTGTACCCGAACAGGTGCCTGAGTTGGCGACTGGGGGATTTTCGCAGTGGCTTCATTGCAGTGTTAATGTAAGCCTACTTGTGACACTAATAAATAAACTTTAAAC
TRINITY_DN18529_c0_g1	CCTGGCAGTTTGAGGGATTTTCTCAGTTTGTGATGTGGGACCAGTCTTGATAATTTCACACGCGTGTGAGACATGTTTGGCTGGAACAGGAGGACGTGACCCAGTAAATCAGAAACCCCCTTCGGCCCTCGCTCGGGGTCCCGGGACACAGAGAGCACCTTCACTGCACATGTCCAGGGAGAGAGGCCATCGAGAGAGGGGGGGGAACAGACACTGCCATCCACATTGATCCCTACAATCACTCATCCACCCAGGAACTGGGGAGAAGGTACATCTGTACCTAACCCCGTGCTGTATCTGTCCTGGGAGTGTTTGATGGG
TRINITY_DN18529_c2_g1	GGGAGAGATGGAGGAGAGGAGGGGAGAGATGGAGGAGTGGAGGGAAGAGGAGAGAGGGAGGTAGGAGGAGGGAAACATGGGAAGGAGCACCGAGTCAGGAGGAGATAATGGGATATATTGCGCGTCACTTACAAACGGACTCAGCCCCTCAGTGCAACTCAACCCCCGACGCTCACCTATAGAAAAGTCGCCCTTATTGCTACACGGAATCACCGTTTTAAAACTTCACACACAGACTAGCACGCAACTCACACAGAAACGTGCACATACAAACACACAGAGGAACATGCGCACACATGCACATGACAAATATACATGTACACAAACATGTGTGCGCACACATACAGACCCATTATTAATGATGGCAATTTAAAGAAGGGAATTTCAGGGTGTTTAACA…
TRINITY_DN18529_c5_g1	CTCTCTGTGTTTCCCTCTCTCGCTCTCTGTGTTTCCCTCTCTCGCACTCTGTGTTTGTCTCTCTCTCTCTCTGTCCCTCTCTCTCGCTCTCTGAATCTCGCTTTCTCTCGCTCTCCCTCGCTCTCTCTATGTTTCCTCTCTCGCTCTCTCTGTCTTCCCTGGGAGAATGAGTGCCTGTGGGAATCATAGAGGGAATACCACTCTGTGGGGAGGGTCGGTGCTGAGGGAGCGCCGCACTGTGGGAGGGTCGGTGCTGAGGGAGC
TRINITY_DN18529_c6_g1	AACACTCCCAGGTACAGCATGGGATTAAATATAGAATAAAGCTCCCTCTACACTGTCCCCATCAAACATTCCCAGGACAGGTACAGGACAGGGTTAGATACAGAATAAAGCTCCCTGTCCATTGACCCAAATAAACACTCCCAGGTACAGCATGGGATTAAATATAGAATAAAGCTCCCTCTACACTGTCCCCATCAAACATTCCCAGGACAGGTACAGGACAGGGTTAGATACAGAATAAAGCTCCCTGTCCATTGACCCAAATAAACACTCCCAGGTACAGCATGGGGTTAGATACAGAGTAAAGCTCCCTCTACACTGTCCTCATCAAACTCTCCCAGGACAGGTACAGCACAGGGTTAGATACAGAGGAAAGCTCCCTCTACACTGTCCC
TRINITY_DN18594_c0_g1	GGAATCAAATCCAGGTCCCTGCAGCTGTGAGACAGCAGTGCTAACCACTGTGCCACCATGCCACCCTCACAGCTAATTGGCTTCAATTGATGTATTATAGGACACTCAATGATAGCATACCCGGAAGTTGGAATGCTACAAATGTCAAGGTGCGGAATTATTATTCAGCTTTGGGGGTGTTTGTGTGCATGAGAGAGAGAGAGAGGGGAGAGAGTGTGTGTCTGACTCATTTCCAGTCTCAGGATCTTCCATTCGCTTTCACTCTCACACTCCAATCCAAACTTTCACCCATTCTCACAGTGAGTGATGATGAGCGAACACTCTGAGATAGGGGTGAGGCAGACACACTGACTTTCCATCATGCCCAGGGGGCTGGTTCGATGCATTGGCCATGCTAAA…
TRINITY_DN18524_c3_g1	AATTGCTCCTTATTGTCAGGGTTTTTGGCAGGGTAAATGTGTGAGGTTATGGGGATAGGGCCTGGGTAGGATTATTGCCGGTGCGGGCTCAGTGGGCCAAATTGCCTCATTCTTTATGGAATCCCTACAGTGCCAAAGAGGCCATTTGGCTCATCAAGTCTGCACTGACTGTATTCTTTTTACCCAGGCCCTCTTCCCTGTCTTATCCGTACAGCCACACACATTTATTATGGCTAATCCATCTAACCTACATATCCTAGGCCACTAAGTGGCTGTTTAGTGTGGGCAATCCACCTAACCTGCACATCTTTGCACTGTGGGGGGAGACCTGGGCACCCGGAGGGGACCCACGTGGGCGCGGGGA
TRINITY_DN18524_c4_g1	GGGACTAAGATAAGAAGCAATTGCGTCACCTAAAGGATTGTGAATCTTTGGAATTTCCTACCCCAGAGGGTTATAGGTGCTCCATTATTGAACGTATTTCAGGTTGGTCTGCACAGATTTTTGTCCCCTTGGATTTGGGGGATATAGGGAGTGGGCAGAAAAGTAGAGTTGAAGCCCAAGATCAGCTGTGATCATATTGAATGTTGAAGCAGACGCAGCCAGCCATGTGGTCAACTCCTGCTCCTATTTCCTGTGTCCTTGTATTCCCTCCATCAGTGTGGGGACTGTATAAAAGTTGCCCGATATCGTAGACGTGGATTCATATGCATCGTGAATCAACAACTTGTTTTCCAAATGGAGAAAAATCCAAGCTTTTCTCCAAGGCCCATCAAATAGCAA…
TRINITY_DN18584_c0_g1	CCCCCCCTTGGCACTTGAAGGAAACCACCCTCCCCTCCGCCCCCGAGGAGCTGTAACCCTCGGCCAAGTTTGCGTGAACTGGCGAAACGGTGCGGACGCTGGAAATCTAAATAAAAACGGAAAGTCTCAGCAGATCTGTGGAGAGGGAGCGTTAAAGTTTCAGGTTCTTATTCACAACTTCCTCACAGTCTTCAGAGGAAGAATCCGACCAGATTCGAAACGTTCACTCTGTTTCTCTCTCCACAGAGCTGCGGAGATTTTCCATTTTAATTTCACAGCAAGCATTTCCTGAATTAACCCTTTTTTTTCCCCCCTTAAAAACAGACAAAACTCAAGGGTGTGAGTGAGGTTTAAAGTTTGCTTATCAGTGTGAGGTTTACATTAACACTGCAATGAAGT…
TRINITY_DN18566_c0_g2	GGTTACAAGAGCAGGTCAGAGGCTGGGAAATCTGCAGCAAGTAACACACTTTCAGACTCCCCAAATCCCTGCAAGGCACAAGTCAGGAGTGTAATGAGTCTTGTCCAATTGCCTGGATGAGTGTAACTCAATTAGCACTCAATACCATAAGGTCACAGCGGCCTACTTGATTGGCACCCCATCCACCATCTTAAATATTCATTTTCTCCACCATGGTTGACGTGCAGCAACTTTCCAAGACTTCTTCAACAACACCTCTCAAGTGACACACCACCCTTTCTTCAGTGTCACTAGGTCAAAATGTTGAGGAATTCCTTTCCTAACCGATACACTTTTACCACAAGAACTGCAGGCACTCAAGAAGGCAGGTCACCATCACCTACCCACGGCAATTAGGGA…
TRINITY_DN18536_c0_g1	GGAGAACGTGCAGACTATGCACAGCCAGTGACTCAAGCCAGGAATCAAACCCGGGTCCTTGGTGTAGTGAAACAGCAGTGCTAACCACTGTGCCACCATGCTGCCCTAGAGAAGAGAAGAAAACTTCTAGAAAATTCATTTCCAAATTCCTCAAGTGATCAAAATTTGTAGTTAACCCAAAGCACCCATTGCAGATCACCTTACGTTCATTTGAAACGGGAGGAGAGCATATGATGGTGCATGCTAGGAAGCAGTCAAAATTTGTTCCTTCAGTTGTACACCATAAGTAAGTGTTGGCATCAAACATGAACAGAAATAGGACAAGGGGCTTGGAAGGCAAAATTTCAGATTTCCAGCATCCACATTTTGTTTTTGTATGATAAAACTGACATAC
TRINITY_DN18563_c0_g1	CACCTCTCCTGGTGGGATACTCTCACCACACCAGGAATATGTCTGGTGAACCTTCATTGCACTCCCTCTATGGCAAGTACATCTTGCCTTGGATAAGGAGACTAAAACTGTACTCAATGCTCCATATAACATTCATAGTTATGAATGTTGAGACCATGAACTATTCATAGTTCATGGCGTTCTCAACAGTGCTCTTTATTATTGCTTCTTGTTTAAATTTGTAATTAATTACTAAGAAATCTCTGTTTAGAATAGGATTTCAAGATTTCAGCAATATAAAAAAATTAGGTAGTCACTGCCATAACATCACCGTCAGCAGTATGTCAATATTTGGTTTAATTCCGATCATTTGTACCTTTTTCAACATTTAACATTCAGTTCTCAACTCCATCTGCACTC…
TRINITY_DN18591_c0_g1	GTCCCTAACAACTTTGGGGGAGTGCTCCCATCTTTTAAAGGGTTGGGAGTCCCAGCGCTAGACCAGAGTACCATAAAACTTTGGTACTCTGTTGCTGATGTGGTGTTGCCATGGGTTTCCAATCTGGCATCGCGACCATCTCCATGCCGACAAATTTTGCCTGATGAATCTCAGATTTCTTCCCTAATTTGTCCCTGTCAATATCGTAGAGGCACACAGTACCTTCAGAGACCATTCAACTCAACTTGCCTGTACTAGACCTTCAAAAAACCACCCAATTAATCCCATACCCCTACTCTTAACTTAAAGCTTCACAAAGTTTGCTTTTTAGGTAAAGATAAAATTCTCTTTTGAAAGGCATCTTGAAGCCACTTTCAGGCTTCAGTCCCTTTCAAGCAG…
TRINITY_DN18516_c0_g1	CGGCGCTCCGAAGGCTCGTGCTACCAAGTGGACCTGTTGGGCTTTAACCTGGTGTTGTGGGACCTAATTTACACCATAAGACAGGTATTTGATTTTTAAAAATAAAGCACTTTTTTACAACAAGGGAAGAAACCAGAAAATAATTTGAGTTAACTGTAAAATTGAGCACACGTTGTGGTTTGGGAGATCGGATACAATTTCTTTTTGTAACTTTAAAAAAAATTTAAAAATTTACTGGAAATTTACTGTGCTGCAGAAACCATACACAATCTAAACAGACAATAGGAACCTTTTTGATCAATAATTTTAATCGGTAAAAAGAAAAAAAAGTTACTTTTTAGTCCTCTACTTTCTCTGTCAGCTATCTGAATGTCTGGTCTGCCCTCCTCCTCACCCCTC…
TRINITY_DN18516_c0_g2	CTCCCCTCATTCTTCTAAACTCTAACGAGTACAAGCCTAGTTTATTCAGCCTCTCCTCATGCTACCAAATAAACCAGTTGGGCTTTAACCTGGTGTTGTGAGACCTCCTAATGTGCCCACCCCAGACCAACACTGACAACTCCACGTCATGTCCAGAGATGTGCAGATTAGGAGCATTGGCCATGCTAAATTGTCCCTTAGTATCCAAAGGTGTGTAGGTTAGGGGGAATTGGCCATGGTAACATATGAGATGCTCTTTCAGATATTCGATGTGGACTGAATGGGGCAAAATGCCTACTTCTGCACTGTAGGGATTCTAAATGGTTCCATTCACAAGTGGGGTGTGCGATAGCTGGATCTAAGGCTCCCATTTCCTCAAATAAATGATGGCGATAGATA…
TRINITY_DN18516_c1_g1	ACATCCAAGGACATTAAAGGGCAACTTAGCATGGCCAGTCCACCTAACCTGCAGATCTTTGGACTGTGGGAGCAAACTAGAACACCTGGATGAAACCCATGCAGAAGAAAGTGGCAAACTCCACACAGACATTATGGTACGTTGTGGTTTAACTGGAAATTATTTGTAAGTAGCCATTGGCAGACAAAATGAAATATATAGTTTGTGGGCCCCAATTGACCCTTTCCCATCAATAATATGGCTGTGAATCTGTTCTTTCAGGGATTATTTTCAATATGTAAGGTGAAAAATTGGAAGCTTTGTTGCACCTGTGCTTTGAAATCATCCAGTCACATTTGGGGAACTAAAATCCAACAAAAGCTTCAAAAGGTATTTGCTTTATTCTTGATTCCCAATTCT…
TRINITY_DN18556_c0_g1	TGAAGAAGAGGGAAACCTCGAAAGCTTGTGCGTTTACTATCAAATAAATCGGTTGAACTAAAGCCTGGTGTTGTCAGACTTTTTACGAGGTTCGAGATAGCAGCTCAACACACCTTCGCAAGGGCAATGAGGGGTGGGCAATAAATGCAGGCCCAGCCATGATACCCACATGCTGCGGAAGAACAATAAGTCTTATTTTGTTGTCGTATCTCCACAAGCATTCTCCAAAGAGATTTTATTACAATAACATGTTGCTCTTGGTGAAATTTGAATGAACCTGCTAAAATGTGTCTTCTCATTGAGCATTTCTGGAACTCCTTTCAGCATTCCACCGAGCTTTTGATTATTTTGCTGAATATTTCATATGATTTGGTGAGAAATGTTCTTGCATTGTGCTTC…
TRINITY_DN18556_c8_g1	GGGGGCCGGATGGCCTACTCCTGCTCCTAGTTCTTATGATACAAAACTCTGAGGTCACGTATCAACCGACTCAAGAACAGCTTCTGCCCTGCTGCCATCAGACTTCTGAATAGACCTACCTTGTGTTAACTTGATCTTCATCAACACCCTAGCTATGACTGTAACGCTACATTCTGCAGTCTTGTCTTTCCTCCTCTATGAACAGTATGCTTTGTCTCTATAGCACACAAGAGTAC
TRINITY_DN18556_c9_g1	ACAAGGCTGTGTTCTCAGCCCCCCACTATACTCCTTATACACCTATGACTGTGCGGCCAAATTCACCTCAACTTGGACTTTCAAGTTTGTTGATGACACTATCGTGGTGGGCTGGATCTCGATGATGAGACAGAGAATCTGGTGAGCTGGCGTGACAATAATCTCTCCCTCAGTGTCAACAAAACAAAGGAGATAGTCATTATGCTTCCTGGAGTCAGTGGTGAAAATGCCCCTGTCTACGGCAATGGGGGCAAAGTAGAATGGTTGAGAGCTTCAAGTTTTTTTAGGTGTCCAGATCACCAACAACCTGTCCTGGCCCGTCTGTGTGGACACTATAGCTATGAAAGCCCACGAACACCATAGAAAGCATTCTTGAGAGCAGCTTGGTACGGCTCCTGC…
TRINITY_DN18527_c1_g1	TAACAATATAATCTGTACAACCTGTGTTGACTTAATTTTACCAATAAAGAGTTACTGTGTAATTAAAGCAAAATACTCAGGATCTGAAATAAAAACAGAAAATGATGGGGAAACTCAGTCGGTCTGGCTGATCTTGTTCTCTGATCTTGTTTAAGTTATGTGGCAGCTCGGCCCAGGTGGTAGTACTCTTGCATCCGAATCAGAATTTTGAGAGTGTTTGGCTGATGGAGGAAAAGAACATGGAATTATACCCAGAAATATTGGACTTTTAAAAGACCTGAGTTTTATATCTTAAAATTCTGGGATATGGAATCTTCAGGCAAGACGGGGAAGGCCAAAGAGGAGGAGGCATTGCATTATTAGTAAAAAGGTCAGGAATAAGGAGAGATAATATCTTAG…
TRINITY_DN18527_c4_g1	CAGAGGACTGATGTCTTTCTGTATCTCTGTTTGGAGGTGTTAAAAGGTTGGAACTCTAGCATCCACGTAAGCTTATAGGTTTTGTGCTAACTGATTCTGAAGAGGGGATTTGTGTCTGTAGGGATATTGCTTAAATTGGAACTATCGAAATAGCTAGTAGTTAAAAATTATACCTTCTCGTGTTTTAGGCATTTTAATTGGTGAATGTTTTGTTAATTCTTTTTGTTATATTTTAACTGTGCTGCTAAATAAAGTTTGTTTTAATAAAAGGTTCCTAGT
TRINITY_DN18548_c0_g1	AATGTATTGGCAAGAGAGATCTTCAAACTCTGATTAGTCTCAACATTTGAAACTGTGAATAAGGGATTGTATAGAATCAGATAGAGTGAGCGTACGGAACAGTTCGATTGTATTCCAGTCTAAGATAATGGGAGAAGGCGGTGTCAGTAATTGGGGATCGAATTAAATTAATCTAGTGACCAAATTGACCAATTGTCACATTACAACAGACCCA
TRINITY_DN66909_c0_g1	CTTCATTACAATATTAATGTAAACCTACTTGTGACACTAATAAATAAACTTTAAACTTAGAACACTTAAAAGGCAAATATAACCTCTGAGCTAATATCTGCTAATGATATTTAGCCAATGATTTTCCTTCTCCGTTTAAGCAATCTCTGTAGAACGCTGATTACAGACATAGATTTTTACATTTGTACCTATTTATGTTGCAGCAGTAAAGTTTTGGAGTGACTAACTGTACCTGCTGACTTTGAGTTGATTGAAGAATACTGCATTTGTAACACAAGTACTTAGCAAAATTTTGCATGTCGCGCACATAAAATTCTGTGCAGCTGTATTCAAAATTCAGTTTTCTATTTGTGTTTAAGACTCATCCTATTATGTACTGTTTATTATTAACTTTGAGAT…
TRINITY_DN66933_c2_g1	AGCAAGCTTTCGAGGTTACCCTCTTCGTCAGGTGGATGGAGAGTTCTGGCCTCAGACAGAGCATATAAAGCACAGACAGTTTAGAGATTGCTGATCAGCAATGGTTTATGGTCAATTATATTGTTACAGTTAAAGGAAACAGCTGATGGGTATTAATTGTCTTTGGGCCCATATAAATAGGGGATCGCCTATATTTTCTGTGGCCTCAAAGAATCCATGTTCCATGTCTATATAGTTTGCCAGAGGTTGCAGCCCCCTTTTCATTATTTGAAGGGGATGTTCCTCAATTTCTGGATTCATGTCAGCCCCCCTGAAGGGGTTGGGGTCGAGAGGGTGGGGTGAAGAAGGAGGAGTGCCTCTTAAACCTGCTCCTGAGGCCTTGCCAAGGAGCCACATCTA…
TRINITY_DN86218_c0_g1	CAATTATTCACAAGTCAACTAAATAGAAAAAGTAAACCAATTCCACATATATTATTTACAATTCTTGTAATTGGAAGTTTTGCATGCACGGTTACAGAAAGGTCACATGTTGCCCAATAGTGTCAAGACTCTAATGTTGAAGCAGTGTATTCAACCAGCACATCCAATGCATAAATTTCAGTTATAGCATGTTAAATAAACTTCAGTGATGGTCCCCCA
TRINITY_DN86206_c0_g1	GGTTGATGTGATCGGCGCAACTCGAGGGCCGAAGGGCCTGTTTGTGCTGTAATGTTCTAATTTAATTTAAGGGGGAGAATCAAATATTTACTCTGAGACTTTAACTGTCCACACCATTGTGTGACCTCACCTGAACATGCCTCCTGCCCAATATATCTTTTGAGTTTTTGTGCTATTTGTCATGAATTAATGAACATATAGTGCAAAAAGATGGCATTTAAATGTACCAAATGGAGATTGTATGCTTGCAACATTGCACAATCTATCCAGGTTATCAAATTACTGATTCCCAAATTTGTTTCTCCATTGTCATTACTTATTCTACTTTAAAATATTGCTATCTTTGCTACAGTGAGAATAATGTTCCCATTTCACAACATACATTAGAATTAAGACAGG…
TRINITY_DN86209_c0_g1	GTCAGTGTTAGAAAATTTATTGCCTGATTTACAAACTTCCACCTCCATTACAAAATAGTTGGCAAACACAATTCATAATACTTCTCAGAGATATAACAGTGCCAGACTCATGGTGTGTTACAGTGATTTCCTTCCCCCCCATCTCTTCATTGGTTCCACCCTCTGCTGAAATTGGGTTCCTCATGCCCGGGACCTTCCAGCACTTCGCCAGTTTCTGCATTAGAATTTGCATCAGAGTCGTGAATGGGGGCGAGAGGGAATCACCTTAGTTGCTGTTCCTTGCTCAGCCTTCTCTCAGAGAAGCAAGGAACCTTTCACATATCTTCACTGCGCCGTTCTTCCTTTCTTGGACTCCTTGGCTATGAATTCTGGGTTCCGGATAAGAGGAGGATAGATGGC…
TRINITY_DN86296_c0_g1	AGGTAGGTCAATTTATTTTGTGACATGATATCCTATTTGATGCTTTGTAGGGGGGTGGGCGATGAGTGGAGGAGAGGAGATTTGGAATGGTAGGATGAGAGTAATGTCTCCAATGAACAAAGGTGACCTTATTTAACATCTTGCTGACAGGTAAATGAAAAGTGATGGTATCCTGTGCCTACGACTTGAGTAAAAAATGATGTAAATTGTATAGCTCAGCTTCTGTAATATGTGCAATCAACTCTCCTACGTCAATTTCACTAATGTGAAGTTTTCAGACCATGTTGAAAACGTAACTGCAATCACACAATCTCGTGATGTTTTCCTTTCCTTTGCACAGGGTCAATAGCGCTATCATTAATATTTGCGCATAAAATACAACACTGAATATGCTGCTGC…
TRINITY_DN20561_c0_g2	TGGAGCCTGTTGCATCAGTGCAAAAGACATCTGCTATTATCTTCAGCCAGAAGATGACTGAATTAGCCATCCAGGCCTTCACCTGAGGTTCCCACCATCGTAAAGGATACTCTTTCACTTGATATAACATCAAGAAACAGCTGAGCGCACTGGATAGAGCAAAGGCTATGGATCCTGACAGTATTTTGGCTGTGGTGCTGAAGACTTGGGCTCCTCTAGCCAAGCTGTTCCAGGACAGCTACAACACTGGCAGCAACCCAACAATGTGGAAAAAAAGCCCAGGCATGTCCTGTTCACAAGGGAAGGTGGAACAAATTCAATGTGGCCGATTAACTAACATATACACACACACGCACACTCTCAGACATACCCCACCCCACCCCACCCCACCCCACCGCA…
TRINITY_DN20587_c0_g1	TCTTTAACTCATTGACTACCAAAGTGACAGTGTTCAGCTGGCATCTTTAGTACAGTTGTGGAGGGTAGGTGAGGCCAGTGGTGAATGGTGCCACCACGCTATGTACTGCATGCACGGTGACCAAGTAAAAGCAAGAGTAAAGAATTCAGCAAAATCTCACAATGTTTGACTATTGATATAAATAACATGACAAACACGGTATCTAAGTAAGGAGAACGGCACAGAACACAGGAATCTGAACAAGCACTTTCGCTACAATACTTTTTACAACTCATAGCTCTATAAGGATTTTTCATTTGGGCCACTTGTCTCCCTACCAGATTCTTGATGCATATTCAGTCTAGAACTGTCACCTCTTGTCCATTCCTATCTGACCAAAACCATAAAGCTATGCTTGTG…
TRINITY_DN20559_c0_g1	GACTCCCCCATTATTGGGGACATTCTTTCTGAATCCACCCTGTCTAATCCTGTTAGAATTTTACAAGTTTCTATGAGATCCCTAAACACCAATGATTACAATACTAACCGGCTTAGTCTCTCCTCATATGACAGACCTGCCATCCCAGAAATCAGCCTGGTAAACCTTCGCTGTACTTCCTCCACAGCAAGGACATCCTTCCTCCGAGGAGGACACCAATATCTGGTGTGGCCTCACCTGTTGAATGCAATATTACTGAACATTTCTCAAGACGTGTGTGGCAATGTTAGTATTACTTAATAACACAAAATCTGGAACACAATTGGGTTTTAAGAACGGAAGTAAGCCATTCAACCCCATAAGCCATTTCTACTATTAACTGAGATCCCTTGATGTTTT…
TRINITY_DN20559_c1_g1	GTGGGGTTACAGGGATAGGGCCTGGGTGGGATTGATGTCGATGCAGACTCGATGGGCCGAATGGCCGCCTCCTGTAATTCTAACATTCTATATTTTATAATCTGTGAAGTGGTTCTGGGCTGTAAATCTGCTATATCACTGTTCACATATAGCAGCCAGGAACTACAAATTTGTTGCAAGTGCTTTAATTAACACGAGAAAAGCTGTATGTCACTGTGCAGGGAGTCAGGATGTCAAGAATTACTAGTAATATGTTAGATGATAGTGTAAATGTTGTTAGCTAACAGTCTGAACATGTGTATATGCATGATTGAGTATTTAAATTAGGTAAACTAATCAAGGTAGTGACTGGCTAATTGTACCCACACGACATAGATAAAGTGATCAAAACTATTGTGT…
TRINITY_DN20531_c0_g1	CAAAATATCTCCGCGATTTCCACCATTAATATACAAAATTCATCTTTTAAACACCAGATGCCTGTTGTAGTTCAATTGGTTCAGATATAAAAATACTTTGGCTTTAGTACCTTTGTAACATTGAAAGGTTAGATACATTCAGGGTGGCTATTGAAGAACAAAAGTGTCTTTAGTTGAGATATGTAGCCAGGAACACAACTCCCCCAAGTTCCTCCACACCAGCAAAAGAAGTGTTCCATTCACTTTCCCCCCCCCA
TRINITY_DN20557_c0_g1	TTTTAAAAAAAAATATATATATATAAAAGGCAGAGGAAATATATTTTGTTACAGTTCTTGGATTTTATACTGAAGCGTAGGGTTTAATTCGCGTGGGGAGAAATGATGGTCGTGACCAAAATAATTTAAGGGTTTTGTTTTTACGGATCAGAAGTTGTAATTCGCCAGAAGTGATCTGTCTCTCCCGTGTTCTTGAAGAGTTGAGCTGGGGAGGGTGGTGGGGTTGGGGGGGGGAAGGTTGGGGGGTGGGAAGGTCTGAAGGCATTTGGATCAC
TRINITY_DN20557_c0_g2	CCTCCATCCCACAAAGCAAATCCTGAAAGGGGAGGGGTTTGGCGGGCAGTGGGGTGGTTACTCACGGAACGAGAGTGGTCGCTCCCTCCTAAATTGTCCCTTAGTGTCCAATGATGTGCAGGTTAGGTGGATTGGCCATGCTAAATTGTCCCTTAGTGTCCAATGATGTGCAGGTTAGGTGGATTGGCCATGCTAAATTGTCCCTTAGTGTCTGCGACGTGAGCTCCTCAGGCTCCGGGTGGGAGTCGTGGGGGCCGGGTGTACTGACTGACACAAATAGGACCCGCCTCCCCCTCCTCCCCCCCAACACCTTCCCACCTCCGCACCCCACACCTAACACCCATCCCACTACCCCTGCAAGGGGGGGAAGGGTGGCATCACACCCCCCTCCCCCTCCTC…
TRINITY_DN20544_c0_g1	CTGCACTATAATGTATAAAGAACAAGGGGTTTCCTTTATCCAATAGCTGAAGCAGGTTTTTGGCTCTCTGTATATGCAAAGGAGGGATAATATCTGTGTGAGTTTCCTTCACACAGATATTAGTTTGCCCTTAGTTTGCCCTAAAGAATCAAGTGCCATCACTTTGTTACAAAGAATTCCTTGCAACAAAGGTGGTAAATAACTTACCTGAATGTAGAGCCAGTAGGAATGCTCCTCCAGGGCCCACATTAAGAAACTGCTTCTGCCCTGTTTCGTCCTGATGTTGTGATCCTTGATCTTCTCCCCTTCTGTTTCGCAACCTACCATACCCTCATGATCAACTAAGCCTTTTCCCTAACCCCTGAGTTTGCTGA
TRINITY_DN20586_c0_g1	ATTCCACGTGAATTTTTTTTAGCTTTTTTTAATGAGTGTCACAAGTGGGTTTACATTAACACTGCTGTGAAGTTATTATGAATTTCCTAAGCATTCCTGCAGTAATGTAACCAATTTGTAGTTTACATTAATCGTTTGTGTAATTAAGTACAGCAATGTTTTACAGAACTTACAGAAAATTGGTTACCAATCATATTGAAAGGGTTTGTTGGTTTTTAATCTTTCAAGTTAAGAAGATTTAATTTCTTTTTAATAAAGCGAACGTTTGCCA
TRINITY_DN20547_c2_g1	GCTCTGTCCAAGACTGCAAGAAACTACAAAAGGTTGTGAATGTAGCCCAATCCATCACGCAAACCAGCCTCTCATCCATTGACTCTGTCTACACCTCCTGCTGCTTCGGCAAAGCAGCCAGCATATTGAAGGATCTCACACACTGTGGACATTGTCTCTTCCGCCTTCTTCATTTGGGAAAAAGATACAAAAGCCTGAGGGCACGTACCAACTCAAGAACAGCTTCTTCCCTGTTGCCATCAGACTTTTGAATGGACTTATTGACAACTAATCAAGTCTTAA
TRINITY_DN20560_c2_g1	GCACTACACCATCGGCAAGGAACTAATTGACTTGGTCCTTGACAAGCTGCGTAAACTAGTAAGATCCTTGCTTTATCCATTAGTCAGAGGAGAAACGAATAGTAATTTGTGCAATGCTTTAACAGTATATAAATTGTCAGTGTTTATTTTTTTGAATCACCCCAATACTCTCACATGATCTATTTTCGTATATTTTATTAGAGGACGTGATGGTGCATTCGGCTGCAATGGTGGCTTCAGAGATTTCCCTTCACATCTGAAAACCTGTGTATCAATCCTCACCAGGGAGTGGATAACTAAAAGATCACATCTCCTTGATGCGTGTTAAGAGTCACAAGTGAAATGCCTTCTTATAGTTTCCCAACTAGCTGCTGGTAATCATCAATCCACAGCTCATGA…
TRINITY_DN20521_c0_g2	TCCACATCATAGCTCCCCTTAGAGGACGAGGGCTGACTGGTGATGATTTAACCTGAGGGTCATCACACCTCAGGCAAGGGGCAAAGGTGAGAAGACGGGGGCCTCTGTGGACAACCTCAGCCGGTACGGGAATCGAACCCGGGCTGTTGGCGTCGCAGACCAGCCAACTGACTCACCGGTCTGTCGAACGACGTTTGCCGGCAGGCCAGGGATAGGCAGACCCCGGTGAGTTGTCCGGTTGTGTGTCAGACACGCTGCTGATAACTTACCGCAGCCCTGGTCTCTTTCCCAGCTCGACCTAAGGGCGATGTAATTGAGGTGTTCAAAATGGCGATAGATCTCAAAAAGGAACGAATAGAGGGGAAAAAGAAGCACTCGGAGGAGTGCCGGGGTGAGGGG…
TRINITY_DN20556_c0_g1	AGAGAAATCATTACAGGAAGGATGTGGAGGCCATAGAAAGGGTGCAGAGGAAATTTACAAAGATGTTGCCTGGATTGGGGAGCATGCCTCACTACAGGAAGGACGTGGAAGCTATTGAGAGGGTGCAGAGGAGATTTACAAGGATGTTGCCTGGATTGGGAGAACATAAGAACAAAAGAACGTAAGAAATAGGATTCTTATTAGGATAGAACATAAGAAATAGGATTCTTAGGGAGGCATGACTTATGAGGATAGATTGAGGGAGCTGGGTCCCTTCTCAAAGAGAGACGAAGGTTGAGAGGCGACCTGGTAGAGGTTTATAAAATGTTGGGAGGTATAGATAGGGTGGATTCTCGGAGGCTATTTCCCAGGGCTGAAATGGTTGCTACGAGAGGACAC…
TRINITY_DN20556_c1_g1	TGACTATCTTCCTTATCTGTGCCTCTCATTATTTTATAGACCTCTCAGGTCACCCCTCAGCCTCCTATGCTTCAGAGAAAAAAGTCCCAGTCTATTGAGCCTGTCCTTATAACTCAATTCATCAAATCCTGATAGCATCCAAGTAAATCCTTTCTGCACTCTTTCTAGTTTAATAATATCCTTTCTATAATAGGGTGAACAGAACTGCGCACAGTATTCCAAGTGTGACCTTACCCATGTCTTGTACAGCCTTTGGGATGGCACAGTGATTAGCACTGCTCCTTCACACCACCAGGGACCCGGGTT
TRINITY_DN20506_c0_g1	ATTTTCAAAGAACTCAACTAGGCTCGTAAGGCACAACCTGCCCTTGACAAAACCATGTTGACTATTTCAGATCATTCTAAACTTCTCCAAATGCTCATAAATCTTGTCCCTCAGAAGCCTCTCCAACAGCTTACCAACCACTGAGGTCAGACTCACCGATCAGTAATTTCCCGGGCTATCCCTGATCCCTTTCTTGAAAGTAGGAACCACATCCGCAATCCTCCGGAGCCTCTCCCATCTCCATCGACGATGCAAAGATCATCGCCGGGGGCTCTGCAATCACTTCCCTCACCTCCCACAGTAACCTGGGGTACATTCCATCCGGTCCCAGCGACTTGTC
TRINITY_DN20506_c0_g2	ATCATTCTAAACTTCTCCAAATGTTCATAAATCTTGTCCCTCAGAATCCTCTCATCAACTTAGACCTTCGTGCATCATGGCTCCCACGACCTACCAACATCTCCTTGTCTCATTAGAATTTTGCCGTACAGAGCTCCAGTCAAACATTCCTTGAAAATCCAGCATCTTCGTTCAGTACTTTTCCCCAAGAACACCACCTTCCAGTTTACTCGTCCAGTTGTCTGCCTGATGTCTACATATTTCCCCTTACT
TRINITY_DN20500_c0_g1	GTCCTTCTAGATGGTAGAGGTGGTGGGTTTGGAAGGTGCTGCCTAAGAAACCTTGGTGAGTTGCTGCAGTGCATCTTGTATGTAGATGGTGCACACGGCTATCACTGAGTGTTGGTGGTGGAGGGAGTGAACATTTGGGATAGTATTAAGCGGGCTGCTTTGTCCTGAGTGGTGGTGAGCTTCTGGAGTGTTCAGAGCGAGTCGGGGGGGTGGACAGATATTTGTGTGCATTCTGTGCTGTCATTGTGCCGAGTGATGATTCCAGTTCCTGTTTCTCATTCACTGGCTCTGTTGTCACATCATTGCATCAGCTGCTGTTTGCCAGAGATTTCCAGATTTTTATTGCTTTTGTGTAAACAAATACTTTCTGATTCCAGTCAC
TRINITY_DN20530_c1_g1	AAGTTCATTTATTAGTGTCACATGTAGGCTTACATTAACACTGCACTGAAGTTACTGTGAAAATCCCTTAGTCTCCACACTCTGGTGCTTATTCGGGTACACTGAGGGAGAATTTAGCATAGCTAACACGTCTAACCAGCACGTCATTTGGACTTTGGGAGGAAACCGGAGCACCTGGAGGAAACACACTAAGAATGTGCAGACTCTACACAGATAGAGCCAGTCGAATCCACGTCTCTAGCACTGTGAGGCAGCACTGCTCATCACTATGCCACCAGATTTTTTTTTAGTGTCAACCTTGAACCTATCCCCTCTTTATAAATCTACAGCCAGGGGAAACAACATTTCACAAGGTGGATAAGCGGAGTTGAGGTACATAGCAACTGTGATCTAATTGGG…
TRINITY_DN20530_c2_g1	GGGACCTGAAGCATCCGGGGAGCTTCACACTCTGACACTGAGGGAGAATTTAGCACCTAGCCAGCACGTCTTTCGGACTGTGGGGGGAACCTGAAGCATCCGGGGGGGGCCCGTGCAGACATGGGAAAAATATGCAGACTCCACAAACATCCACACGAGCCAGGAATCGAACCCGGGTTCCCTGGCGCTGTGAGGTGGCAGTGGTAACCATTGTGCCACCGTCTGGTCATTATCATATTGCTGTGTGTGTTGGATTTGCTTTGTGTTTGATTTACCATATATCATGTTTCCTGCATGACTAATACGTTCCAGAAGTACTTAAATGGATGTTAGGTGTTTTTTGGAAGTCATATGACCTTGAAAGGCATTATGCAATTTTTGGATTTTTTTTTCTTGTTG…
TRINITY_DN20530_c5_g1	TACCAGGGCTCTCGCTTCTCTGCGTTGTGGCTCATCTGCCAGCTCCTTGACCACTCGCTTCTTTGTGGTCGGGAGAAAGATACAGAAGTCTGAGGACTCAAGAACAGCTTCTTCCCTGCTACCAGAATTTTGAATACTTTCTCTACACCCCAGCTATGAATGTAACACTACATTCTCCACACTCTCATTTCCTTCTCTATGAATGGTATGCTTTGCGTGTATAGCACGCAAGAAACCGTACTTTTCACTATTTGCAGGCACTATGCTATTACATGTGACAATGATAAATCAATCTCCTTATCCCAGAAATCCACCTAGTGAACCCTTGTTGCACTCCATCTAAAACAAGTATGTCCATCCTTGGGGAGGAGACCAAAACTGTACACAGTCCCACTAGTA…
TRINITY_DN20530_c7_g1	AGAAGACCTGTCGAGTCTGCACCGACAGCAATCCCACCCAGGCTGTATCCCTGTAAGCCCATGTATTTACCCCGCGTGTCACCCTGACAGTAAGGGACAATTTTAGCTTGGCCAATCCACTTAACCTAACCATCTCGGAGGAAACCGGAACACCTAGAGGAAACCCATGCAGATACGGGAAGAACATGCAAACTCCACATAGACAGTGACCCAAGGCTATAATTGAA
TRINITY_DN12839_c0_g1	TTGTTCCCCCTGGATAGACGGAGGCTGAGAGACAACCTGGTAGAAGTTTATAAAATTATGAGGGGCATAGATAAGGTGAATAGTTGGAAGCTTTTTCCAAGGGCAGAAATGACAATTACAAGGGGGGCACAAGTTCAGGTCTTTTGTTTTGAAGTTGCAGAAAAGCTGCTTGTTTGCCTCCAAGCTTTCTCAGAAACAGTGGGAGATTTCTTTTGATTGCTGTTTGTTTGCTGTGCTGCAAACAAGATGAGGAGGAATTTCTTCAGCCAGAGGGTGATGAACCTATGAAATTCACTGCCACAGAAGGCTGTGGAGGCCAAGTCATTGAGTGCATTTAAGACAGAGATAGATAGGTTCTTGATTAGTAAAGAGATCAAGGGTTACAGGGAAAAAGGGGAA…
TRINITY_DN12888_c0_g1	ATTTGATTCAAGACTGGATGAAGACTGGAAGACCTGGAAATCACAATATGATCTACTCTGGTTGCAGCCTCAGGCCACACATTTGATTTAAGACTGGATGAAGACTGGAAGAGCTGGAAATCGCAACATGTGAAGCAGTACACCGAGGTAAAAGGGGGATTTGTTCCAGTCTGGAACCTATTCCAAACATTCAGCTCACTCTCAAGGGGAAAGGGATTCCACACAACAGGAAGAAGAGATCCACAGGAGATCGATATGGGAGGACAATGTGAGACACATCGAACTGGTAAATTATTGAGAATTTTTACTTGGAGTCAAGGTGGGAGAGATGAGTTCACAGTTGGGTGGATTGAGTGTGTGAAGCGAAATTGAAAAGATATTGGTCCTGAAATTCCATGG…
TRINITY_DN12820_c0_g1	CGCAACATCGTGGGCCGAAGGGCCTGTTCTGCGCTGTAATGTTCTATGTTCTATAACTATCCTCATTGCTATCTGTCGCATTGTTAAGTTTAATATCAGCTGTATTATAATGCTGTTTCCCACTTGAGATCGGATCATTTCTAAATATTGTAATGGATAATGGACTCAAAGTTGATTGCTGGGAGCATCACTGCAAATCACCTTCCATTTTTAAAAATGTTGTTCCTAATTATTGGCCAAAACTCTCTAGGCAAGGATCTCTCACCCAGACCGTAATGAGACAAATAATACCCACTTCCTCCGATTTTTCTTTTCAATTTTCCAATGGAGGATCATTCCAAATTGATTCAGCACAGGAAACCCTTGAGGCGTCAGTGAAGGGAATCTGTGTAGAAGCCA…
TRINITY_DN12806_c2_g1	CTGGGTGACTCTCAACTGCCCTCTGAGGACAACTAGGGATGGGCAATAAATACTGGCCAATCAGTGATGCCCGTGTCCCATGAATGAATAAAAAAAAGTAATGAGGGAATATTGCACTGGCAGGAAATCTGTTTTTTATTGAGATGTCAGGCGCCCTGGGGAAAAGGGTTAATTGAATCCTCCAAGGTGCCTTGGCCAATATTTATCCCTCAACCGACATCAGTAAAAACAGATTTTCTGGTTATAATGTTGTTATTGTTTGTGGGATCTTGCTTTATAGAAATTGGCCGCAATATTTTCTACATTATAACAATGGCTTCAATTCAGGAATACTTTGTTGACTGTGTAATGCTTTGGGGTGTTTGGTGATATCGTGCAGAGGATTTTTATGAATCTGTA…
TRINITY_DN12806_c3_g1	GCGGCGCCCAAAACTGCACACAGTACTCCAGCTGCGGCCTCACCAATGCCCTATACTTTTAGTTCTAATTTATTTTCTGATCATTGATCCAATTGATTATATCAATTCATATAGCTTTGCTGCACAAAAGAACATTTTTCATTCCACCATGCCCAGCAGTGAAACAGGTTTCTCATGAATCTACTCCTCTGTCCAGTCCTCATTTTTTATTAGAACTATAAACATGTTAAATGAGTTTTAAAACTAGATACAATTGTCACTGACCAAGGAGGCTGATGTTAAATATCTATCTTGGAAGTGCAGAAGTGGCCAATTGCATCAATAAAATTAATTACTTTATTTAAAATACTACAACTTTAATTCAATAAGTTTGTCATAAGTGGTTGCATGATTGCTTTA…
TRINITY_DN12806_c5_g1	GCAATGTGGTTGACTCTCAACTGCCCTCCAAGTGCAACGAGGGATGGGCAATAAATGCTGGCCCAGCCAGCGATCCCCGTGTCCCAGGAGTGAATAAAACAAATTTCTCCATTTCAAGTTATTTTTCCAATTCTCTTTTGAAAGTTATTATTGAATCTGCTTTTGCTGCCCTTGTGTAAAGTCACTGCTTATTGCTGTTCTGATTTATTTCCCAATTATCTTTGATCTCTGTCCCTCTCATTACCAACTGTCCAGCCACTGGAGGTGCTATCTTCTCATTCACTCTATAAAAACCCTCCATAATTTTGACCATTTCTGTGCAATTTATCCTTGACCTGCTCCTGCTCCAGGGAGAACAATCCCAGCTTCTCCAGTCTCTCCACATTGACTGAAGCCTCT…
TRINITY_DN12806_c9_g1	ACTGGGAGGATGTTCAAATGCCGCACAGTCACCCAAGGCTGGAATTGAACCTGGGTCCCTGGTGCTATGAGGCAGCAGACTTATGGGGAAAACATATTAGGAAACTGCTCTGAAGAAGAGCCATATGGATTCAAACACTAACTCTGTCTCCCTCTCTACAGATGCTGCCAGACCTGTTGAGGTTTCCTGCATTTTTTTTTATTAGGAAACATAGGATATAGAGTATTAGGTTGGAATTCTGAGAAAGAAAGAACTTAAAATGTGAAACTTGACGACACTGAATTCCAATATAGTGATGAATAAGTAGTGTGAAATAATTAATTTTGAAGATTAGAAGAAAGAAGTCACAGTTTAGAGCATTAATGATAAAAAAAGAAAGACTTAAAGCAGAGTTAAGGT…
TRINITY_DN12806_c10_g1	AAAGTGCTGAGTGGTTGGCAAGTGGTAGAGGCATTGCCATGGAGAATGCACCAGATAACAGTTAACTACCAAGTTTTTGTTTAAATTCAAGCTTGAATTTGGCTTGATGGTGGCGTTCTATTAGTGGAGAAAACATTCATGTTGCTGCTACCTGTGTGAGGCAGCTAGCTTTTTTAAGACACCTTGCCTTTTCAGAATTGAGGTAGACTGGGCACACTTTAGCACCAAACTTTTAGTGCTGGTATGATCTCAGATGTGTTGCTCATATCTGTGTATGGTTGGTGGATTGTATCACAGCTTATCCCCATGACTGTTTGGGCCAAGCAATGTACTGACGTATTCAAACCTGTGCTTGCAAAATTCAAAACCAATTTTCTACAATTGGACAACATTTATTAA…
TRINITY_DN12893_c0_g1	CCTCCTTCACTCCCTCTTTTCTCCCCTCTTCTCTCTGTCTCTCTCTCTGTCTCCCCCCCCCTTCCCCTTCCCCTTGTTCACGGTGGGTATGACGACTCGGGCACTGTGACGCAAGGCCCGCTCTTGCCAGGGTTGCTGCCTGTTGATCTTTTTCTTTTGTTTGGTGGTTTTGACCCCCCCCCCGGGTGTCTATGGCAGCAGTTGGGAGGCCCCGTGTCACCCTCCCAGAGCTGGTGGGCAGAAAGTGCGAAGAGCCCTTATTACGCCTTGTGTGTGTTGTTGGTTCATTCTCCTTATAAATTATTTTGTAATGTGCAACATTAAATTAAAATAATATTGACGAC
TRINITY_DN12855_c1_g3	TCTTGGATCCTGGGAGTTACCATTGACCAGAAACTGAATTGGACTAGCCATATAAATACTGTAGCTACAACAGCAGGAAATTCGATGATGAGTAACGCACTTCACTTATACTTATGACTTGACCAACTGTAAGGTTAAAACCAAGGAATATGCCACGTAAGTCCAAGGCAATGATCATCTCCAACAGGAGAGGATCTAACCATCACCCCTTGACATTCAAGGGCATTACCATCACTGAAATTCCCTTCCATTACCAATATCCTCGGGGTTGGGGGAGGGGGTGGTTTACATTGATCAGAAACTCATAGATACTGTGGCTACCAGAGCAGGTCAGAGACTGGCGATCCTGCGGTGAGTAACTCGCCTTCTGACTCCCCCACCCAAAGCCCATCCACCATC…
TRINITY_DN12855_c6_g1	CTCTCCCCACTGCCGCTGTCAGACTTGCTTAGATTTTCCAGCATTTTCTGTTTTTGTTTGACTCCAGGTAATTTGCTTTTATCAAGGAACAAGGTAATGATTCCACCTTCTTCTGGAAAGCTAAACCCAAAGGTTGGCATCACCATTAAAAATTAAGTTGGCTCTCTGACTCCTCTTGCGGGAAGTCAGTGTGTCATGACACCTTGCCTCAACTTAGCCCAGAGGCAGTGCACTAAAGTCCTTAGTGTGTACATCTCCATAGAAACGTGTCCAAATGGGCAACGAGCTGATCCTTCTTGGGTGACTTCAGCTCCAGAATTGGAAAGGACATAAACCACAACGAGGACTCTGTTCCTGATAAAATGCCTAAAACACAGTCTTGTCATAACTAACACACCT…
TRINITY_DN12823_c0_g1	CCCCAGCACCCCCACATCCAGCAAACACCCCCCACTATCGGCGGGACTCACAGGTGCTGTCCGGAAGGCGTTCCTTGTTTCGGAGAGACCAGACGGAGGACCGTGTCAGCGAGAGGGGGTCCATGTGGTTTTTGGAGAGGGCCAGCCACGAGAGCGAGAACGGGAGGGGTGGACGGGCCCACCCCAAGGTGCTGACCCCGGACACGATCCCCGAGTTCGTCATCCCCCCCCCCCACCCCTCTCGCTGCGGCCTGGGAGGCAGGGTGTCCGTCGGGCCTACCCCCGGGGAGCTGGGGGGCTCCACGCGGTGCAGGCGGGGGGGGGTAGGCCGAGATCCTCCGCCTGCCCGAGAGCCCCCACACCCGCAGCAAGGAGTACCTCTTCCACGCCCGGGTTGGC…
TRINITY_DN12861_c0_g1	TCACCAATGCCCTATACAGCTGCAGCAAGACCTCCCTACTTTTATATTCAATCCCCCTTGCATTTGTGTTGAAATTCTGCTTAAATCTCCATGCAATGCATCTTAAAAATTTATGTTTTTAAATTTAAAGCACTTTGTTTTATTCTGTAGTTTCTTGATGTTGCTGTCATATCACAGAACAATATATGATTTGTAATTGACTTGACAAGAATTTGGACTTCGTTCCCTGTGCTGCAAAATGGCATCATGAATGACACTGGTTTTTAAGGGGGGAAAATCTTGAAATTTGATGACATTTATTATCTAAAATTTACATTTTTACCAGAAATGCATATTTTTTCAGTAATGCTGGTATAAGAACAAAAACTTTCAGTTGAGATTATCTATAAATTTCATTAT…
TRINITY_DN12824_c0_g3	GTCTGACAGTGGCAGGGAAGAAGTTGTTCTTGAGTCAGTTGGTACGTGACCTCAGACTTTTGTATCTTTTTCCCAATGTTTGTTATCCGCTCCTCCACTCCAGCCAAAACTAGTTAAGAGATTCTTCATGCAGTGAATTTCTAAGATCCTGCCTCATTTGAAATGAGATTTTCTAATCTTTGCTGTGGCTGCGATTTGCTCAGTCACTTCAAAATGATGCCATATCCTCTTGACAGCAGGTTCAAGGTGGATCTGGCACCATTTCCCACCGTTGCAAAGATCAACAATGCTCTGCTGGAACTGGAGAGCTTCAAGGTCAGCCAC
TRINITY_DN12824_c1_g1	ATACAAGAGTTGGGAAATCATGTTGCAGCTGTATAAAACCTTGGTTAGGCCACATTTGGAGTATTGTGTGCAGTTCTGGTTGCCACACTCGCCGGAGCATTTAGAGGAAACCCACACAGACATGGGGAAAAAGTGCAAACTTCACACAGACATTGACCCAAGCCAGGGTTCATGGTGCTGTGAGGCAGTAGGGCTAACCATCGTGCCTCCCCATGAACTCAACGTGAATGATTTTTTCTCTTTGTGATGATTTCCTCTCTTCCTAAGATGTTAACCCCTTTGTGTAGCATAATACAATGGTCATCAAAATTCCTGTGTTCCTTCTAGAGTGCTAAAAATAGTGAGAATAGTAAAAGTTTGTTTAGATTTGTTACAATCCCCATAGAGGCCATTAACAAA…
TRINITY_DN12824_c5_g1	GGAGGATGTTGACTATGAGGAGAGGTTGAATAAACTAGGATTGTTTACAGAGGCTGAGGAGAGATTGTAGACAGAGGCTGAGGGGAGACCTGATAGAGGTCTACAAAATTATGAGAGGCAATGACAAGGAGAATAGTTAGAGGCTTTTTCTCAGGATGCAAGTGACAATTACAAGGGGGCACAGGTTTAAAATGAAAGGGGGGAAAGTTTAAGGGAGTTATTTG
TRINITY_DN12864_c1_g1	TCAGGATCTGCCGACTCCTTTAAGAGCATCTATCCACAAGGAAACAGGTGAGCTGAGAGACTGAAGCAATAATTGCGGCGTCAAAATGTAGGCAGGGTTCTGAGAAATGTGGAGGAACTGAAAGATCTTGTGGAAACAGGTGAGCTGAGAGATTGAAGCAATAAATGTGGGGTCAAAATGTAGGTAGGGTTCTGAGGATTGTGGAGGAACTGAAAGATCTTGGGGTTCATATCCCCAGATCTCTAAAGGTTACCACTCAAGTGGATAGAGCCGTGAAGAAGACCTATAGTGTTTTACCGGTTATTTATAGGGAGTTTGAGTTGAAGGCTGTGGGGTTATGCTGCAACTATATCGGATCACATTTGGAATATTGAGTGCAGTTCTGGTAACCTCACTATA…
TRINITY_DN12864_c2_g2	TGTGAATCCAGCTCCCTCACACTGTCACTCAGTAACCCCTCTCTCTCCCCCAGCACCCTGTGGTACTGACTGTATCTGTACTGATGTTAATCCAGCTCCCTCACACTTCACTCAGTAGCCCCTCTCTCCCCCCAGCACCCTGTGTTACTGACTGTATCTGTACTGATGTGAATCCAGCTCCCTCACACTCTCACTCAGTTAACCCTCAATTGAACCTCAGTTTGTTTCAATCCTGAGGTTTGCTCCAACCTCACAGTCTCAGCCCTTAGGGAATCTTTTTAAATGTGTCTATTGGACACTGAGAATGCTTAGACAGCTGAATGTAATTTGCCTTTTCTCTTTGTGGAATATATGCCTGTAAGTAAATAAAAATGTTTGAC
TRINITY_DN12881_c0_g1	GCTCTCCAAACCAGGCAACATCTGGTAAACCTTTTCTGCATTCCCCCCAAAGCCTCCACATCCTTCTGGTAGTGTGGTGACCAGAATTGAACAGTATAGTCCAAGTGCGGCCTAACTAAGGTTCTCAACTGTTTTGCTGTGAAGGTCTCCTCCCATGTTATAAAGTTCCAGGACCCACTGTAATACAACTACTTTTTCTGTATAAAAATGAGTTATACAATTAAAC
TRINITY_DN12881_c1_g2	GTAGGCAACATCCTGGTAGATGTTTTCTGTACCCTCTCCAAAGCCTTCACATCCTTCTGGTAGTGTGGCGACTAAAATTAAACACTTTATTCCAAGTGCAGCCTAACATAGGTTCTATAAAGCTGCAACATGACTTGCCAAATTTTAAACTCAGTTCCCCAGCCAATGAAGGCAAGCATGCCGTATGCCTTCTTGTCTACCTTCTCCACCTACATTGCAACTTTCAGTGATCTGTG
TRINITY_DN12881_c1_g3	GTAGGCAACATCCTGGTAGATGTTTTCTGTACCCTCTCCAAAGCCTTCACATCCTTCTGGTAGTGTGGCGACCAGAATTGAACATTATATTCCGAGTGCGGCCTAACTAAGGTTCCATAAAGCATCAACATGACTTGCCAGTTTTTAAACTCGGCGCCCTGGCTGATGAAGGCAAGCATGCCATATGCCTTCTTGACTACCTTCTCCACCTGCATAGCCACTTTGAGCAACTTGTGTACCTGTACATCCAGATCCCTCCTCTTATCAATACTCTTAATGGTTCTGCCATTTACTGTATATTTCCCATCTGTATTAGACCTTCCAAAATGCATTTTTATCAGTGGGAT
TRINITY_DN12837_c0_g1	TGAGAATATTATCAAATAAATAGGTTGGACTAAAACCTGGTGTTGTCAGACTTTTTACTGAATCAACCTAATCCAAACCCTACTCTGAAACCCCAGGAGAAAAACCAAATAAACAAAAATGCATTAACTCTGATTAAAACAAATATATTCCTAACTAAAATCAATTATTAGCCTGCATTCTCTAAGGCGTTTCGTTTATCAAACGGGTTCACCTTCGATGGGACTGGAAGATCCCATCGACAGATAGCCAGAAAATCCCACCTTCTCATTCTATGGTAACTCTCACACATGACCAGCAGCTACAACCCATTTGCTTACACACTTTTCTTTTAAATCTCAAAATAAAAAATGTTTAGCTTCAGTGATAAACCTTGACCGGTAATTGTGTGTACCTAATTG…
TRINITY_DN12837_c4_g2	CCAATGTCCTTTAGGGAAGGAAATCTGCCATCCTTACCCGGTCTGGCCTGCGTGTAACTCTTAATTTCCCTTTGAAATGGCATTAGGCATGTGGGCAAACATTGTAGGCCCGGCTGCAACACTCTTATCCAATGAAAAGAGTTGTTTTTAAAAATTACCTTGTTGTTGTTTGTAGGAGCTTGTCATTGTGATGATACTGTGCTTTTAAAAAATGTATTTCTATAATGTTTCTTGTAAGGGGTATGTTTAAAATTCAGCTCTGTTTTAAACAGTGCCAATTTGTCTGCACCGGACAGCTCAAATGTTGAGAATCCAAGTGACCGATTTTAGCTCATGATGTGTTTGCCTACAGAGAGTTAATGCATTTTTGTTTATCTAGGTTTCCCTTGGGGTTTCAGA…
TRINITY_DN12847_c1_g1	AGAGGACGTAGTGGGGTAAATACATGGGGTTATGGGGATAGAGCCTGGGTAAAGTGATCGTGATCTGTCGGAGTGTCGGTACAGACTAGATGGGCTGAATGGCCTTCTTCTGCACTGTGGGGATTCTATGAAGTTCTTTCTCCCTGGACAGCTCATGATGTGCCAAGCTGCTCTAGAACATCTCTAGAAGATTTACTGAAGCTCGGTGCTCTAGTCCATGCTGTCATTGAGGGGTTTTTGGGGAGGTGTTTGCCCTGGGACTGAAGCAAAAGGAATTATTCCGTAATTGCAACAACAACCACTTGCATTTATATAGTAACGTAGTAAACCATCCCAAGGTAGTGCACGTGCAGGAGCGACAGGCAAAGATGATTTGAATCTGAACCCCTGATGGAAGTC…
TRINITY_DN12847_c4_g1	CAGGTGCTCCAGTTTCATCCTACGTTCCAGAGATATGCGGGTTAGGTTGATTGGCCATACTAAATTGCCTTAGTGTCCCGGGATGCGTAGGTTAGACAGATTAGCAGGGTAACTATGTGGGGTGACGTGGATAGGGCCTGGTTGGGATTGTTGTCGGTACAGACTCAATGGGATGAATGGCCTTTTCTGCACTGTAGGGATTCTATGATTTTAGACTTCCCATGCTAAAAGTCAGCAAGA
TRINITY_DN12847_c5_g1	ATAGAGTTTGCAGATTCTCCCCATGTCGACATGGGTTTCCTCCCACAGTCCAAAGATGTGTAGGTTAGGTGCATTTGCCATGATAAATTGCCCCTTGGTATTGGGAGATTAGCAAGGTAAAAACATGCAATTATAGGGATAGGGCCTGCATGGGATTGTTGTCGGTACAGACTCGAGGGCCGAATGATGTCTTTCAGTCCCATAAGGATTCTATGATGAACTGTTAATTTTTTGAACCTGAGACTGTGGTGTGTTAGCCAAAGATGTTAAAACGATTTGGGGCTAACATAGGTGAGTAGATGAAGTTGGATCACAGGTCATGACGTTGTTGAAAAACAGAATCGTCTTGAGGGGCTGAATGGCCTCCCATTTCTATGTTGCCTGGGGAGATATGTGAGT…
TRINITY_DN12896_c0_g1	TTGGCGCTTAACAGTTCCCTTTATACCCTTAAGACACTGGAATGTTCAAATGAATGCAAAAATACATAGACAAGAAACAAGTATTTCACATAATCATTTTGCTAACTGTAAACAAAAGTTTGAAACATGACGCTCAGTGCCTGCACTGATACAAAACCAACCCTAAATACAGGGTATAAAACATTTAATGTAACCAAAAAAGTAAGAGTTACATTAAAGTACTGTACTATAATATATAAATGATCCTGGCATAATTGAAATCTTTTCCCACCCCCCCAG
TRINITY_DN12805_c0_g1	ATAGCAGTGCGGGCAGTGGTGAAAGATTTGTGTGTGTGTGTGTGGTCAGTGCCCCAACAAATAAAAGTGACCCATCGGCCAGTTGTCCAGTTGAATGACGGAACAGGTTTGAGGGGCTGAATAGCCTCCTGTTCTCCCCACGCCAGGGTTATCTGCATGGTTAGTACCTCTACACAGCAGGTATTAGCCCAGCGAATGCCTCTGTACATTGGGGTACAAATGTGGTCGATGCCTCCATTTGTAGGATAAAGATAATTGAGATTTCAGATAAGACCAGAGGAAATTTCTGAAGACCAGACTAGTTGGAGGCTGATATTGAGCATTTCCTGCTCTTGTCAGAAGTCAGGATTACACTCGGGGAGTTGTGTAGGTTGTGGGTGGCTTCCAGTCATTTCAAAG…
TRINITY_DN12862_c0_g1	TGATAGCCAAGAAATCCCATACCAGTGGTTGCATTGGCCATGCTAAATTACCCCTTAGTGTCCATAGCTATGTAGGATTAGCAGTTTAGCCATGGTAACTGTGTGTGGTTATGGGGATGGGGTGAGGAGTTTAGCATGGGTAAGATGCCCTTTCGAGAGTCAGTGTACATTTAATGAGCCGAACAACCTACATATGCACTGTAGGGCTTCTATGGAATATGTTCAAGCCATGTTGGTAGTGGTACCATTTTCTTTCTATTCCAGTTTTTGTTAATTCTCCACTCGAAGAATAATAGTCCAGTCAGTGTTGTCATGAAACTTCTTTAGTACATTGATGTGAGCCCACTGTGGAATAATTACACTTGAGCCAATATACTTTGATGTTGTGCAGTACACTTG…
TRINITY_DN12862_c1_g1	GCTTTTGGGCTGGCAGGGAAACTGGGGGGAGGGTGGTGGGGAACAGTGTGTATTATCTCAGGGAGGGAGAACACCGAGCACACACATCTTTGCCGCGTTAAGCTGGTCGCAGGACAACACCAGCGCTTCAGGGAAGTACAGTGGTTCCCCATCTCCGGGAACTCTCCTGGGAGTTGGGTAGGCGGGACAATCGGGATGAGGTGATGGTTAACGTTGTCCCTTTAAAAAGTCATGAATTGGGGTAGGGGGGAGAGTATGAGTAATGGCAGCGTTTCTGAAACGGTGCCACCAACTCTCAACAGTGTCACCGATGGGCCTTTCAGGGTGTGTATCTGTCGGGGGGAAGGGTGCGAGTGAAGCTTGCCCTGAACACAAGAACCTTGAGCACATTCGGGCTTC…
TRINITY_DN12862_c2_g1	ATTCACGTCCTCCTCCGTGAAGACAGAAACAAAAAAGTTATTCAATACCTTCGCCATATCCCCATCCCCTACCACTAGGTCACCTTTCTCATCCTCTAAATAAATCCTGTAATTTGGAACCATGAATATGGTTTTGTTAACTTATTTATTATTGATGTTATTAGGCAATGACATGGAGCTTTTGAACAGTTGAAATGGGTTTTATGATGCCTAGCTTGTCTGTAATTAGATTTGCCCAGGCATGTGTTTGGGATCACAACTGTTCCTGTTTTCTGCAACCCTGCGTTTGCTATGTTTATTAGCTCACCTCAGTAGCTTCAACACAGCTCTGAAGACACTACCCACAAAAGCAGTGAAACATCAAGTGTTGGCATGTTGTCTCAGGAGTTCACTTTTATT…
TRINITY_DN12862_c4_g1	AAATGACTGAAATTGTGATTTTACAAATGCTTCTATCTTCTTGTTGAAACTGTTCCCTTTATTGCTAAATCTGGGCAGCTGCTTGGGCTGTAGAGATACGTGATATGCTGAAATATCATTAATTATTATATACGATAATGACTTGTATTGAGCTTTTAATAGAGTACCATGTCCCAAGATGCCTCACAGGAGCTAATCAAACAAAAATTTGGCTGCAAGTCATATAAGGAATGTCAGGACAAGTGACCAAAAGCTTTATCAAAGGTGTGGTTTTTTAAGGATCTTCAAGAAAAAAGGGAGGTCGAGAGGTGGAGAAGTTTAGGGAGGAATTCCAGGGTTTTGAGCCTAAACTGCAGAAGGTGTGGTCAGAAATACTGGAGAAATGCAAATCAGTGATGC…
TRINITY_DN12829_c0_g1	GGAAATTCTTCAAGACTATGAATTAATCACTTTCAAATTAGTATCATTTCTTCAGATCAAACTATTCACATCATCTCTTATTACAATTTAAACTCACTTTATTGTGTTGTCTGGTCAGTGCTAGTTTTAACTGAACACTGCTCAGTATGTGATATGATCTATGTTATTGAGTTTTGAAAGAGAAAGGGTTATTGTTGCTGCTCTGTAATTATAATGAATGTTGTTGCTCTATAATTGTAATGGATATTCCTAATTTTATCATCTGTATCACTGTAGGTATTTGAAATCAAATGCTAGTTGGTTAATTTGTCAAATCTTAATTGGGAACCATTGGAATGCTGAAACTAATACGGACACAAGCTAATAAAGAACAGG
TRINITY_DN12863_c0_g1	TTCACCTTCAACAACCAGTTCTTTATCCAGACACATGAAACAGCCATGGGGACCAAGTTTTGTGAGACTTCTTACTGTGTTTACCCCAGTCCAGCGCCGGCATCTCCACATCGTTATTTCAGATTGCCACTGTCTGCTTAGATCTCAAGAGTACATTGGCAGGAGTTAAGTACATGGAGATTTCTGTCAGCATTTTTTTGTTAAAGTCTGCTTTTCCAGTAAGGTGGAGGCAAAGTCACGTGTCTGAAGTATGATACTTTTCGCCGATATTTTCGTATCCGTTAACTGTTTTAGTGATAAGGTTGGCAATACAGCGATATTGGCTGATCTTAATGATAATCATTCCAGTTCTGGCCGCTACATTTTATGATCTTGGTGAACTTAGCGCTGGAAACACCA…
TRINITY_DN12863_c0_g2	CAACAGCTTCCGCGCTGGCTAAACGGAGCTCTCGGCTGAATGTCGTCAAGGGCTGGTCCCCAGTGATTGTAGGCCCTGCCACCGGGGAGGGCACAGACACCCTCGGAAACGATCGCACTTTCCTCCATTGACACAGTCACACTTCAGCCGACAGTCAGGTCCATAGAACCCAGGGTCACAGGCTGCAAGTAAAAGATTAGCTCACCATAAACAACCATTCACAATAAATTATGACGTGGAGATGCCAGCTTTGGACTGGGGTAAACACAGTAAGAAGTCTCATAACACCGGGTTAAAGTCCAACAGGTTTATTCGGA
TRINITY_DN12863_c1_g2	ACAGCGTTCTGAGGACTTCTGGCATTTGCTGTCGGATGGACCTGTTGGTCTTTAGCCTGGTTTTGTGAGACTTCTTACTGTGTATAGCAAACAAAGCCCAGATTCCATGAATGAATTAAAAAATTATAGCCTTTTCTCCTGTCTTATTTTACATTGATAGTTGGAAGACATTTCCTCCCACCAGAAATCTACATCCATTTCTGTATTGCGCTGGCTACTAGTACATTTGGGAGCTGTTCATTAAAAATGAGCTTTGTAACATTTATGACAGTTTGGCTTATATACACCCCCCCCCACCCAAAATATGAGAGCAAATCGCATTGTCAAGAATCCTCTGTTTCTAATCCATGTTTTTATGAATTTTATTACTGGATTATTGATTTCAGTTAAATATAGATA…
TRINITY_DN12863_c2_g1	TGTGGGTTGGGTTTGTGTCTTTGTGTGCCCTGTTTGTGGGTGGGGCTCCCACTCACCTGATGAAGGGGCGGCACTTCGAAAGCTGGTGGCTTTTGCAACCAATAAACCTGTTGGACTTTTTAACCTGCTGTTGTGAGACTTCTTACTGTGTTTATCCCAGTCCAAAGCTGGCATCTCCACGTCTAGGTTTTCCAGCCAGAGGAAGCAACCTTTTAATATCTACCCCGTAAAGCTCCTTCACAGTCCTGAATGTTTCAATGAGATCACTTGAAAACTGATGAACATTCTTGAGACACCATTGCAATCTGGGATTGTGTCTCAAGTTCAAAAACAAAAGTAATTTTCTTTCGGTTGGTAAAACAACCTTGAAGTTGAGCAAATTGTTTTGCAGAATCATTA…
TRINITY_DN12863_c4_g1	TGGAGACTTGCATTCCAGCCATTGTTTTGTAGATTGGGTTTGTGTCTTTGGATGCCCTGTTTGTGAACAGAACTCCCACTGGTGGGGGAGCGGCGCTTCGGGGGCTGGTGGCTTGTGCTGCCGGGTGAATCTGCTGGACTTTGACCTGGTTTTGTGAGACTTCTTGTTGGGCTTGATCTACATGATCCAAGCTGATTGGAGCAGGCATTGCACCTTCTCTGAG
TRINITY_DN12816_c0_g1	AAACCAGAGCACCCAGGGGAAACCCACGCAAAAATGGGGGAGAACATGCAAACTCCACACAGTGACTCGAGCTGGTAATCGAACCTGAGCCCCTGGCGGTGTGAGGCAGCAGCGCTAACCACTCTGCTACTGTGGTACCTTTTAGAAATTTTGGTAGCAGTGGGCTTTGAACCCATGCCTCCACAGAGACTGGAGCCTTAATTCAGTGCCTTAGACCACTCAACCATGATACGATATCTGTTAAAAATATTCAGTGACTGCCTCCAACTTTACTCCCAGCACAAAACATTGAAGAAAATTCACTTTAAGGAGCAATGGATTAAGTGCCTATTCTGTGAAAATAGATTTGTATCTTTCTTAGAAATTATGAATGTTTGTTTACAAAAAGCTTTGTTCGTG…
TRINITY_DN12816_c3_g3	GTGCGGGGATACCGGGCCGCTGGCCGCGCATGTGCGGGGCCACCCGGCGCTGTCCTGGTTTTGGCCGCGAGCGGAAACAAAGTGGGAGGATATCGAGCTTGGACTTAATATCTCAGTGAGCAACCCTTCTCTGAACTTGGTGTGAATCCAGCCCAAGCTGATGGAATGGAAGTTCTGACACCCTGGTAACTGCGATGAGAGAAGGACATCACCACCCAATTTTGGACTGTTTTGCAGTGCCGAACTAAGATTGTGAGAGGGGAGAGATACAAAAGTGTCCAGAGGAGCC
TRINITY_DN12807_c0_g1	CTGAGGGAGGGATAGGAGTGGGAGAGATGGGGGAAGGGTCTGTGTTTCACTGTGGGATGTCCTGAGGGAGGGATAGGAGTGGGAGAGATGGGGGAAGGGTCTGTGATTCACTGTGGGATGTCCCGAGGGAGGGATAGGAGCGGGAGAGATGGGGGAAGGGTCTGTGATTCACTGTGGGATGTCCCGAGGGAGGGATAGGAGCGGGAGAGATGGGGGATGGGTCTGTGTTTCCAGGGTCTGTGTTTCACTGTGGGATGTCCTGAGGGAGGGATAGGAGTGGGAGAGATGGGGGAAGGGTCTGTGTTTCACTGTGGGATGTCCTGAGGGAGGGATAGGAGTGGGAGAGATGGGGGAAGGGTCTGTGTTTCACTTTGGGATGTCCCGAGGGAGGGATAGGAG…
TRINITY_DN12801_c0_g3	AAACAGCAGTGGCCCCAAAACAGATCCCTGAGGCACACCACTCGTAACCGAATGGATGCAGGGTGGTTGCCTGGTGCATGGGATGGACTCTGGGGGGGGACATTGAAGGGCACTGGCTTTGGGCACAGACAGTTGCACAGGGAATTGAGGTCTGCAGTGTCTGAATTGCTGCAAGAGGCTGGTTGGACCTGGGACACTTTGAGACTTGAGATAAGAGCAGGCCTAGAACAATGAGTTTAATAATATGATCAGCAACTGACGGGGCATAAATACATAAATGTATATATCGAAACCAGTCATTGATAGAGGACGTAACTATGTGCAAGTTAGGTGGATTGGCCATGCCAAATTGTCCCTTAGTGTCCAAAGATGCATGTGGATTAGGGGGATTAGCATGGT…
TRINITY_DN12851_c0_g1	GCCGGGAATCGAACCCAGGACCCTGGAGCTGTGAAGCGGCAGTGCTAACGCCTACTCCTGCTCCTATTTCTTATGTTCTTATGTTCTAACCACTGTGCTACCGTGCCGCCCCTGACGCAAAAACATACCCCCTCCTTAATCTCCATTTCCTTGTGGCACTGCTTCCCAAACTACTTCCTCTCAGTTGTTGCCAACCTCTGCCCGCATCCATTTAGCGCATAAACATTGCGCGACCTGCTCTGCTTTTGCCGCTGTGACGTATTTGCCAAAGTTAAGGAACACCTTTGGCCCGCCGTGTGTCCAGTGCACTTTGGCGGAACTGGTCCAGTGCATCCCGGTCCTTCCCGCTGCAGGATCGGGCAGTCCGTTTTCCACCGTAGAACTTGTTGCTCGGAGGCG…
TRINITY_DN12804_c1_g1	ATTAAACAACACTGTTACATGCAGAATAGCAGCAGATCGGAAACCTCTGCTGCAGATACAAATTAATGCAGAATTAATTTCTAATTTAAAATCTGAGATTGATAGACGTAGCTGAGGTTATTAAAGGATATAGGGTAAAGGTGAGGGCTAGGTTACCGAAGATTAGATCACACATCAGCCATGAATGGTACAGGATGATAACCTCCTCCAGCTGCCACGTCCCTTTGTTATCAGCCAGGTTTTAGTTTCATTTTATTTCTTTAATTAAGATGGAATATGCACGATCAAATCTAGATTCATATCCTGACATAACTCGATATACATTTCACTAGGGTTCCCAGCCGTTCTGGTCACTGAACAGATAGCTTGAGGGAGGAGCCAAATCTTCTGCTTAGAGAC…
TRINITY_DN12804_c3_g1	TATTGGACTTTAACCTGGTGTTCTAAGACTTCTTACTGTGTTTACCCCAGACCAACGCTGGCATCTCCACATCATGATTCCCAAAGTTGGACATCGTCGCACTTTTAGCCTCAAAATGCTGGAGTTTCTTTGAGTTTATTTACAGCTGTTCATGTGACTGGTGGGTGACACATGCTTTCTCAGCACCTGACTGCAGTGTGAGCTTAAATGTGGGCGTACATTCTCTTAACACAATAATTCTGTTTCTTCACAGGTAATGTAACAACCTGTAACGTGTTTGGGCTGCTTTTAGAGTCAAATGCTTTACAATGTCACAAAAAATTGTGTTTGTATAACACCTTTAAATAAAATTAGTCCCTAGAT
TRINITY_DN12832_c0_g1	GGTGTCTATGGGAGTTTCACAGTAACTTCATTGCAGTGTTAACGTAAGCCTACTTGTGACTAATAAATAAGTAAACTTTCACTATTGATTGTGTCAAAACCTTTTGTTATTTTGCTAACTCCTGATAAGTCACCTCTTGGTCTCAAGGCCCCTTGAGCCTGCTCAAACATTCAATAGGATCATGGCTTCTCTGCTCCTGTAGCAATTGTCTCACTTACCCTAATAAAATGTAGTTACTAATCTCATCTATAATGTTTACTAATATTGTGGGGAAAAAAGTTCACCTGGTTATACATTTCATTGCTTTTTGTGAGACCAAATTGATTGACAGATTTCCCTCAATAATGTCTTTAACATGTTGAGTGTTATCAAACTGCATTTGATTCTGAGTCATGTAAG…
TRINITY_DN12858_c0_g1	CGAACCCGGGGCCCTGGAGCTGTGGGGCAGCAGTGCTAACCACTGTGCTACCGTGCCGCCCAATGGCCTCCTTCTGCACTGGGGGGTTTCTGTGATTCTGGGATTCTATGAAAAACAAAACCTCTTCTGAAAGAGGTTTCCATTTCTTCCATTTCCTCCCACATTGGGGTAGGGTGCAGGGTGAGCCTGGGTGAGATGCTGTGTTGGAGTGCCAGCGCAGACTCGATGGTCTGAAAGATGTGCTGGTGAGGTGCATTGGCTGTGCTAAATTCTCCCTCTCCGAACAGGTGCCGGAGTGCGGCGACTAGGAGATTTTCACAGTAACTTCATTGCAGTGTTAATG
TRINITY_DN12858_c0_g2	TGCGTGGGTTTCCTCTGGGTGCTCCTGTTTCCTCCCATACTCCGGAGATGTGCGGGTTGGGTGGATTGGCCATGCTACCTTGTCCCTTGGTGTCGGGGGGGCTAGCAGGGTAGATGCAGGAGGTTCTGGGGATGGGGCTTCCCTGGGATTGTGGTCGGTGCAGACTCGATGGGCCCAATGGCCTCCTTCTGCACTGTAGGGATTCTATGACTCGTTTCAGCTCCTATTTCTTATATTTTTATGTCCGTGCAACTTTTACAAGGGTGAACTGTTTGCAAACTGTTGTTCTTTGTTCAAAGGTGCCATATTTAGTTGCTTGGTATTTCAAAAGCTGCATATTGCTGAACAGAGATACATCTGTTAAAGCTTTTCCTGTTCAACTCATCAGGACAAATTCAT…
TRINITY_DN12858_c1_g1	CTCTGCTGAGTCTGCACATTCTCCCTATGTCTGCGTGGGGGTTTCCTCTGGGTGCTCCGGTTTCCTCCCACATTCGGAAAGACATGCTAATTACGTGCGTTGGCCGTGCTAAATTCTCCCTCAGTGTATCCAAACAGGCGCTGGCATGTGGCGACTAAGGGGATTTTCACAGTAGTCATTGCAGTGTTAATGTAAGCCTACTTGTGATACTAATAAATAAACTGTAAAACTGTATTTAAAA
TRINITY_DN12858_c3_g1	ACATACCTAATCATGTGTCGGAGTGTGGTGACTGGGGGATTTTCATAGTAACTTCATTGCAGTGTTAATGTAAGCCTCCTTGTGACACAAATAAATAAACAAACTTTAGAAGAGGATGAGAAGTAACTATACACTACAATGTACAATTACCTCCCCAATCCCATTTTCCCCTTCCCCTAAAAAGCTGACGCATCTCTCTCCTCGCCACAATGTATCAAAATTATTTTGGCCACTATAAGATCAGTCATGATCTTATGAAATGGCAGGGCAGGCTTCGGGGGCCAAACGGTCTATTCTCACTCCTGTTTCTTGTTCTTAACTTCTCCCCATGGCACTTAGTGCACACTCACTGCCTCCAAGTGTGTAATCCTGATTTTTATGATTCAGTTTATAATTGTA…
TRINITY_DN12858_c8_g1	GAACGTACAAACTCCACACAGTCAGCCAAGGCTGGAATTGAACCTGGGTCCCTGGCACTGTAAGGTAGCAGTGTTATGGGGCTGATAAGTCGGAGGCTCTGGGGACACAAGTTCAAATCCTACCATGGCTGATGGAATTTCAATTCAATTAATAAATCTGGAATTCAAAGTCTTAATGATGGTATCCATAAAAGCAATCATTGATTGTCTAAATAGCCACCACTTTAGAAAATTTACCATCCTTACCACGTTAGGTCTTTATGTTTCTCCAGACCCACATGTGGTTGACTTTTAACTGCCCTCTGAAATGTGTGGAGATGCCAGCATTGGTGTGGGGTGGGCATAACAGAAGTCTCTCAACACCAGATTAAAGCCGATTTGGAATTACGACCTCGCTCG…
TRINITY_DN12886_c0_g1	CGGGTCTCCGGCTGACTGCTGTTTACGGATGGAGCGGCTTTAGAAAGTGTCTGGAGATGTGACTGACCCCGGGAAAATACTGCAGTTGGTGCTGGGAGAAGCGAGTCGCAGCTACCATGGCCATGTGTGAATTCATGCCGAGCGAGTGAAACCGGAGTCGGGATCTACCAGCGACCCAGCCTGTTTGTGAGAGGCCCGGATTCCCCAGTCAGCAGCACATTCCCTGGAGAGCAGGGTGCCCATTGTAGCGGTGGTGTCCAGGCAGCAGGGTGCCCATTGCACTAGGGGTGTCCAGGGAGCAGGGTGCCCATTGTAGTGGTGGTGTCCAGGGAGCAGGGTGCCCATTGTAGTGGTGGTGTCCAGGGAGCAGGGTGCCC
TRINITY_DN12853_c2_g1	GTCCCCAGGCATGGTACATTGGGGAGACCATGCAGAAGCTACCACAACAGATAAATAAACACCGCTCAACAATCACCAGGCAAAACTGTTCTCCCCTTGTTGGCGAACACTTCAGCGGTCACGGCATTCAGCCTCTGGTCTTCGGGTAGCGTTCTCAAAGGTGGCCTTCACGACACTGCAGAGTTGCTGAGCAGAAACCGATAGCTAAGTTCCACACACGAGGATGGCCTCAACCAGGATCTTGGGTTCATGTCGCACTATCTATA
TRINITY_DN12821_c0_g1	TACAGTCCGGAGCTGGAGAGAGAATTCAAATTCCAATTCTGAACAACCAGGAAGGAACTTTCAGAGAGGGAGGGAAAGAGAGAGAGAGAGAGGGGAAGGGAAAGGAGAGAGGGAAGCTCGGATCCATGCAAACCAGCCACATCTTCAGCCCAGACAGCAGTAGCTCCGGAGGGGGCGACTCCCGCCGTCCAGCTGAAACCCCGCTGAGAATCGACAAGTGTCTGGCGGAGGAGAGGGAGGAACAGCAAGAGAAAAAAAGCACGGGGAGGGACGGCAGAGCCTCTCTTCCTCTCCCACTTGTACCTGAGAGCCTGTTTGCAACCGGGGGAGGCGGCCGAGCAACAAACACCTGGGAGGCGCTGGAACAGCAGGCAGAGCTGGTGAAAAGCCCCATCCTGA…
TRINITY_DN12826_c1_g1	TTCCCCTTTCATTGATTTTATTCTTACAAGCATGTCATTTACCTCTATGCTAAATTTACAACATAAATATACGCAACACTCATTTTTGGCTCAGGTATACATTTCTCTTCTTATTTTGGTTGAAATAGTGATGGTGTTACTTTGTCTTTTCAACTGAAACTTGCGAATAATGCTGTGAAATACATATCCCCAATTCAAATGTTCAACAGATACAGTCATGCAGTGTTTAAAGGTGGGGGAGAGGTAACCTTTTCTGTTTTGACTGGTTCATCAGCATAAAGGCTGTCGGGAGTGCAAAAAGCAACTAACGCAATGTTAAAATGCAACTGTGGCCA
TRINITY_DN12894_c0_g2	ACCTGGTGTTGTCATACTTTTTACTGTGTTTACGCCAGTCCAACGCCGGCATACCCACATCATTTGTATTCTAGCCCATGTTACTGATGCATCAACAGTAGACAATTTCACTCTTAAAACATTTCGTGAATAAAGCCACAACTTTTCACATGTTTCTTTGTAACTTCTCATTCCAATAGCATTCCAAAAAAAATCATCACTATACCCTTCATACCGGTAATAAGTGTCTCATGAAACAGAGACACTTATTACCGTGATATTGCTTTGAGATAATATGCTAATGAGCAAGCAGCCAAGATGTGAACCATGTGATCAGCACGCTGTTCAGATAAACTTGCCGTTTAGCTCGTAGCGTGTGGTGTGGAGGAATCACAGCTTGTACTTGCTGGTTAACAATAG…
TRINITY_DN12894_c2_g1	CTGTGGAGTTTGCGCATTCTCCCTGTTTCTGCGTGGGTTTCCTCCGGATGCTCCAGTTTCCTCCACAGTCTGAAAGATGTGCTGATTAGATGGATTGACAATGCTAAATTGCTTCTTGGTGTCCCAAGTTGTGTAAGGTGGATTAGCCATGGGAAATATGTGTGGGGTTACAGGAATAGGGTGGGGACAGGGCCCAGATAAGTGACTTTGTCAGTGTAGCAATGCAGACTTGATGGGCCGAATGGCCTCCTTCTGCTCTGTGGGGATTCTTTTC
TRINITY_DN12873_c1_g1	ATTTGAGTACGAAGTAAGAAGTGTCACATCACCAGGTTAAAGTCCAACAGGTTTATTTGGTGTCATGAGCTTTCATCAGGTGAGTATTATATTGCTTTATTGGAAGATTATAGGACATGTTAATACTTCTCCCATTTAATTCAATTACAGTAGATCTCACTTCTATCCATGTTAGCAACCATCACCTTGGATGTGCTCAGGGTGCAAATAAAGAATTCCAATTGACCATTTATACTACTGTTATGAAGATTTAGCCAAGCAATTCCAAACCAAGATTTCCTGCAAATGTTTATGTTGGCCACTATATTGAAAGGTCAAATGCTGTAGTTTTTCCATACAGTAAACTATAACTCTAGAAATAGTAAGTAAGACTACCTGAAAAAAGCAACTATGGGAAAG…
TRINITY_DN12873_c5_g1	AAACATTTGAACAGGTGAACACATAGCAGGGGAGAACAGGATTACACTTGTTCAGGTTGTTCAGGCTGCAAACCAAGCAACACTCACGGACCAGCCTCACATTATTTGGTCTGACGTGAAGGAGCAGCTGGGAAGGGGAATGGGATCAGGAGATAAATAAATAAATAAAGCTGAATTAAAAAGGCTTCAGTCCTGAAGTTCTGG
TRINITY_DN12809_c0_g2	GTTGGCATCAGTTCACCATGGTGTTAGAATGAGTGTTAAAAACATCGGATTTACATTGGTTTTCTATCCTTGCCCAATCAGTTTCAGGTTTGTTGCTTAGTGAGACAGGGAGAGAATCTGTTTTGGCTAATCCCCAACTTTCTGATCTACCATTGGCTGTTGATAAATCAATAGATTGTGAGGTCAAAGTGCAGGCCGGGCCAGTGGTTCCCGACTGGTGTGACACAGCAAACTGGTATGGCGTGACACACCACCCCCACAAATGTGCTGCAAAGAAAGATTGAAAGTGATTAAAAAAAAACTAATCTTTGTCTTCAGCTCTCCAAACCCCAATGAATCTTGGACATGCACTGGT
TRINITY_DN12803_c0_g2	TGTCGGGTGAATCGGTTGGACTTGGACCTGGTGTTGTCAGACTTTTTACTGTGTTTACCCCAGTCCAACGCCGGCATAGCCACATCATGAATGGGAACCATATTTCAAATACAAGTTGGTGCCCCAATTTCTTTGGAACAGGCTTTGCTGGCTCTATCAGGCCTCATTCTACTAGAGTGATGACGTAAACCATGCCCCAGATTGTCTGTATATCATGTCCCACACGGTCTCGTCTGAGAACTCAGCTGTGTTTCTGGAGAGAAACTTGCTGGTTTTTACTTAATTTAGGGAAAATTTCACTCTTTGGTTTTCATTTTTGCCTTTCACAACTTGCTCTTTTACATCTGTTTTCCTACTAGACCACTGTTTTCTTATTTATCACTAGCCTTTCTCTTACTA…
TRINITY_DN12844_c0_g2	GCTAGGGTTGACCAGATGGTGGGAGGGGGTGGGAGGGAGGGGTGAGAATCTGCCTCAGTCTCTCTTTGGCCACTTTTGGATTTGAAATCTTCTTGTTAACACCCATGTTGACTGACTCCTTATGCCACCCCCCTCCCCTCCCCTCCTCTCCTTTTAACCTCTGTCCCTGTGGCATCATGTCAGTCTGGGGACATAACCTTATCAAAGTGCAATTGAGCTCCTCGCTATTTCATTAATTAGGCAGAGGGCAGCGATGCTGGGAGGGGGTGATGGAGATGGTCACCGGCCTCTCAGACCTCCCCAGTGACATTTCTGATCAGCCCTGGACTGAAGAGGGAGCTGAAACGCCTCCCTCCGATTGTACCAGCGAAGGCACAATCAGACAGACTGTGTCCAACT…
TRINITY_DN76201_c0_g1	CAATGAAGCAATAAGGAATCAACTTGTCTTGAAAATGAGAAATAAGGGTAGGACAGATACTATCAAATACAAAACAAATTTGATCTATTCAATTTCACGTGTTCAAATTAAAGCAAATTGGTTTTGTCTTGAGATTGAGATTCAAAAATGCAGTACAGTAATTTTCGGTACTGCCCATAGTGGGGGGAAGCCATGTAATTTGACGTTGTAATTTAATCTATATTGAGATAAAATGTCTACTGCCCCTCATACATGGAGCAAACTTCTATAGATGGAGCAGAATCCTCTTGCGCTAAATCCTCTTCTTCCTCAGTCTCTGGCCAATGGTAGAAGCCAACTAAGCGAATGATAACACACGCAAATGATGGGTATACTTTATAATCATGCTATAATTGTAAT…
TRINITY_DN76206_c0_g1	GTTGGGTGGATGTTCAGCTGAGTCAGGAATTAGTCTACCGACACCTTGAGAATACGCTGAATAATCAGCCCAGGCACCCTTCCCGAGTGATGTTTGGAGGAACACTGTTGTTGAATTTCAGAAGGAGAGGTGAAGCAACACTTTGACTGCTGGATTATCTTGACCCTCTCCTGCTCCGGCCGAGCTCCATCCTCTGAGTTTTGAAGGGAAACTGGTTTGTAAGAGCTCACTTGACAACCCACCCCCC
TRINITY_DN76254_c0_g1	GTTATACTCAGTGTTTTCCAGGTTTGCTGTCTGCACTGTTGGGACTCAAAGCAAATTCAAATCTCTCAAACTCGCAGTCTCACATTCGAGGTTTGAACTTCTGTTTCATTCTTCTTCGGTGAAACACTTGGCAAAAGTGTCAGTCTTTGGTGAGAGCAGCAAGAACCAAATAAGGTGCTGCGTGTTAGAGGGTCGGCTAATCCGGGGAGTTGCAGAGCCAGTTAGACGATGACCCCCATCAGATTTACCCG
TRINITY_DN49638_c0_g1	CAACGCTCTGCAGATTTGGGATTTTCGGAAATCAACTGTGGAGAAGAACATCCCGTACCCTGGGGATAAAGACAATGGTGAATTCATCTACGCAGCTCGATATTGTACCAGTGATATTGTGATCGCAGGAGGAAGTGGGACCAACAGTGCACATGCTATTAACATTAAAACCAATGCGGTCCTGGGGGAGATTAAGCTGGAGAACCATCCTGTGCACGTCATTAGCACTGTGATGGACGGCCAACAAATTGCACTTGCCGGAGCAAAAGGGTGTCTGCACGTTGGCTATCTTCTTTAGCACAGAGAGCTGAGGAGAGGC
TRINITY_DN18436_c0_g1	CTTTTAACCCCATTTTCCCCCAGTGCTGTATCCAGCCACCTCTTGAATACATTCTATGTTTTGACATCAACTACTTCCTGGGGTAATGAATTCCACAAATGTCTCCTCACCTCCATCCTAAATCATCTATCCTGAATCCTCAGACTGTGACCCCTGGTTCTGGATTCCCCCATCATCAGGAACATCCTCCCTGCATCTATCCTGTCTAGTCCTGTTAGAATTTTATAAGTCCCTGAGATGTCCC
TRINITY_DN18442_c0_g2	CAGGCTCGAAGGGCTAGATGGCCTACTCCTGCTCCTATTTCTTATGTTCTTATTGGAAAAGATGGCAGCGGGGTGGGAGTGTCAAATGGTGCTGGGTTTCATCCAGGAAGTGTGTTTCACATGCTGTGGAGCTTTGACTCCACAATGTGTGATTTTTGTCCTGACAGCTTAGAAGTCAGTCTAATCCTGTCTTCTATTAGGGTGGGGATCATTCTGGAGAAGACCACTGTACCAGCCATGTATGATTTGACAGGGCATGGAATCTGACCCTGTGGGTGAATGCAGATAAATTGGGGACAGGATGCAAAGGGGGTGAGTTGGAGAGATCTGATATTTAGGTGTACCTAGAGGATCAGGTGGAAGCACCCCTACTCTTCTTGGCCAGAAGGAGTGCTGTCA…
TRINITY_DN18488_c0_g1	TTTCTATCAGCGAGGGAGGGCCGTGTGTACACTTGCATCATTTATTCGGGGCCTCGATGATCTGAAAAGAGACGGATCTAAAACCAGAGCACAATTCTCTCCTGTTTTCACTCATTCCCCCGCTACAAGACAAGCTCAAAGTAAAGGATGTATCTGTTACTGAGTCTGCTGATTTTATTTCAATACGTGAACTCGGAGACAATCCATCAGACTCCCCCAGCTGTTTCCAAATTTCTTGGAGAGAGAGTGGAGTTGGGATGCACTGCGGAGGGAGTCAGTAGCGGTACCATGTACTGGTACAGACAATACCCGGGAAGGGGGCTGGAGTTG
TRINITY_DN18405_c2_g1	GGTTGGAAGGCGAGTTTTTGCAGGTAATCAAGTCTTAAAGGTACAACTTGTCTACCTAATATGCTGCATGAAAGGATGTCCCGTGGCATGGTACATTGGGAAGACCATGCAGACGTTACGACAACAGATGAATGAATACCACTCGACAGTCACTAGGCAAGATTGTTCTCTGCTTGATGGGGAACACTTCAGCAGTAATGGGTATACGGCCTCTGATCTTCAGGTAAGTGTTCTCCAAGGCAGCCTTCACGACACACAACAACGCAGAGTCGCTGAGCAGAGACTG
TRINITY_DN18495_c0_g2	CAGACCCAGGTTATAAACAGTGCTGACACACTAATGGTCTCTATGGGGCAGAACTCTATGGCCCCATTGTGGCGGGGGGGAGGTGAGGCCAGAAAATGTGACAGGGCTATGCAAAAGCCCACTGACAGCAGCAGGACCTGGGAGGTCAAGCCAGCAGGACTGACCATAAAATTCCACCCAATGGGTCTGTTACAATTCAAAACTGGACAGTCTTTTTTTCTGTGAGGAGCTCAGTTTTCCCACAATTAGATTTCACCAGCAAAATTCAAAATGGAATTGTCCTATGCAGAATGAAAAGAAACCAGGGAATAGGAAGAAAACAACAGAGGGGAGAGTGAGTGAGAAATAAACATGTGCATTATGTCTTCATAAACCCCAAAGTGAGTTAAGCAACCCTGG…
TRINITY_DN18424_c0_g1	CTTCCTTCTGCCTCTTCTCTTGAAAAGGGCATTGCAATAGCATTTTCCAAATTTATTAAAATCTTTCCCACATGTAAGGAATTTTGGAATACAAGTGGATCCACCTCTCCACTGCCACTTCCTTTAACACCGTAGGATGTAAAGCCTTCTCTGTTCAATACTCTTATTGATATTTAATAACTTAACAGTCCGAGAAGTGAATTTCCCAGCACAGATCTCCCACATCCCCCTCTCCACTCTCGAGGGTGGAAGCCTGTGAGGAACGAGGCGTCGCCACGTGGCGGCCATCGTAGCTCCGGGCTATAAATTCGCTCATTTTTATTACAACTGAACGACAGCGTCTATCCACGGACTATAAACATTATAAGCAGACGGAATTCCGGGGAAGAGCGAGAACAA…
TRINITY_DN18477_c0_g1	CCCTCAGCCACGCACCATCTTGACTGGGAAAATATATCACCGTTCCTTCGCTGTCACTGGGGTTGAAATCCTGGCACCCACTCCCTAACAGCACTGTGGGTGTACCTACACCACAGGGACTGCGGCGGGTTCAAGAAGATAGCTCATCATCATCTTCTCAAGGGGTAATTAGGGAGGGGCAATAAACACCGGCCAAACCATGGACTAATTCGAGAAGCTCAAAGGTATCTCACTGGGGGGTTATCAAACTAAACTTGACTCTGAGTCGCTGAGGAGATATTAGGCCAGGTGACCAAAGTTTGGTCAAAGAGAACATAAGAACATAAGAAATAGGAGCAGGAGTAGGCCATCTGGCCCTTCGAGCCTGTCCCGCC
TRINITY_DN18454_c1_g1	GTTTATTTATTTATCAGTCACAAGTAGGCTTACATTAACACTGCAATGAAGTTACTGTGAGAATCCCCTGGTTGCCACCTTCTGGCACCTGTTTGGGTTCACTGAGGGAGAATTTAGCGTGGCCAATGTACCTAACCTGCACATCTTTGGACTGTGGGAGGAAACTACATGGAGAGATTGTGCAATATCCACACAGACAGTGGCTCAAGCCGGGAATCAAACCTGGATTCTTGTCATTGTGAGGCAGCAGTGCCACCTTTTTTCTGGTTTTGCCTGTTTTTTAAATAGGTGAATCTGGGTGTCTTTTTACATCATATATCGGCTCAGATGTATTTTTTTAAAGGACCACTGGACCCCCTTGGTCTCTTTCTGATTGGTTGCTAGCCATTTTGAGCAGGC…
TRINITY_DN18458_c0_g2	ATGGTTAAACATTTGCCTTAACCACAAGTGCTTCAATTTTATAATAGAAGATACTAAATTCTTCGCAAAAGGAAGTACAATGTCTTGGGTTATTCATGCCTTTTTCATTTAAAAGAAGTTTACGGGTACTGGTCTAATTTATTTGAGTCTAGAAATCAGAATAAACTTGGGTGCTGTTAAACCAGTCATTACAAGTGATAGAAACAAATTTTGTTTTCGCACAGTATTACATTACAATTGTAAACATGATGGCACAAAGAAAAAGTGATAAATAGGGTGGCTATCACATGCTATACAATAATCATGTTCAATAATGTGACATTATTGAACATGTCACATTATTCTACTTATTTACAATAATATAATACAGTACACCTGGGCATTTTCTAATTATTATTG…
TRINITY_DN18438_c0_g1	GCCTGCAATAAACACACTCTCTGTCTCTCTCTCTCTCTCTCTCTCTCTCCCTCTGTCTCTTTCTCTCACTTACACACTCTCTCTCGCTCTCTAAATGGTTTAATATTCAGCGGAACCAACATGTGAGATGGTTCCATCTTTTCTGATGAATCAGTGGAAATGTTAATGGTATAAATGGTTGGTGTGATATTTCCCCAATACTTTTATTCCTGATAACTGCCCAGTGACCTTTTCTAGAGGCAGGTTGATCCTCATGAACTGCAACTTGCCTTTTTTCCTTGCACATTTTCTCCTTCCTCCATTTTTCTCTCCCTCTTTCTCTCCTCTCTCTCACTCCTCCTTTCTCTCTCTCCTCTCTCTCAC
TRINITY_DN18425_c0_g1	ATGGGAATAGGGCCTGGGTGGGATTGTGGTTGGTGCAGACTCGATGGGCCGAATGGCTTTGTTCTGCACTGTAGGATTCGATGATAGTTAATTTCAGCCATCCTGAGTTCTTCTGCGTTGCTGTATCTCTCGCAGAAACCCCGTTTACGTGAATAAGTGGGTTTTCCATTGAAAGTTACGGTAACCTTTGGAAGGAGCACTGAGGGAACTCGCCCCATTGTAGCAGGGTCATGCTTCCCTTCCCTTCCCAAAATTCCTGAAGCAACTAACCCAATTGATTCATGTCACCCAAGGTGTAAAAGTGCTCGGGCACCATCCTCGTTCCAAAACCCTCCAGGTCGACTATTCCAGCAGCAAGTGCCCTCTTCTTTTGCAAAACTGTTCAAAGTTCAAGTCGAG…
TRINITY_DN18425_c1_g1	GAAACTCAGCTAATGTTCTGGGGACCAGGGTTTGAATCCCACCATCTGCAATGAATCCACTGATGACCATGAAACCATTATTGCTTATTGGAAAACCCATCTAGTTCACTCATGTCCTTTAGGGAAGAAAATATGCTGTCCTTACTGTGTCTGACCTACGTGTGACTTCAGAGTCACAGAAATGTGGTTGACTCTCAAATGTCCTCTGGCAACTAGGGATGGGCAATGCATGCCAGCATGTGATGCTAATGTCCCATGAATGAACTAAAAAAAACTTTAGCATTCTTAATATTACAGGTTCAAATCTCACTTCTAGACTGATGTTCCAGTACGCTGTCCTTTCACAGATGTAAAATTGAATCGTCATCTGACCTAAAAGATCTCTCAGCACTGTTTAAA…
TRINITY_DN18437_c0_g1	GAGGGGGTTAACAGGCGGGTAATGGGGGGGGGGAATACCGCTGACAGTCTCAGTCCTTCTGGTGGAGTCTAACAACAACATAAATCAATTACAAAGTCGCATTAGTTTTGTAACTGCCCACTACTTTTTAGTGAGTTTTCTGCATGGGCTTCTGAATCTCTTCCTGCATAGATTTTGGCTTCCCACCATTCAGAAAAAGACTCAGAGTCTTAGATCTTTGCTGGGTCCCAGCCTCTCCCTTCCTTACGTTGAATTTCGTGAATCCACCATAATTTTGCCCACTTTGACCCCTCTCAGAACTTCACAGTTTTTGAAAGGCATACTTTCTTGGTGAAGTCTTTAGTTTGAAATACAAAATATGGAT
TRINITY_DN18473_c0_g1	GCTGTACGTTACTGTTACACATTGTGCTGTAACGGGGAAAGGTGTCTCTTTCGGAGAATTGACGGGTAAATGTTTCTATTTCCCGCTGAGGAGACAACATGAGGTTTTCTGTCCTAAGAACTGGGTAGGTGGACAGTGCCCATGCTGAGGGACTTGGTCTCCAGTGAGGTGCTCCTGGCCCTTCCTTCCCATTTCACTGTTGAGTTTGTTCCCAGGGACAGGAGTGTCTCATTCGGACACTGGAGTCTGTCCGGTCCGGTCCGGTCCTCTCACTGGTGACAGGCTGCTGTGTCTGTGCTTTTGACCCCATCATCCACGGGAGAGACTGTACCTGGGGAGGCTAATGAAGCAATGGAAGAGGCAGCAAGAAGAACCTGTTGTAAAGGGGGTCACTGTATT…
TRINITY_DN18473_c1_g3	GCAGGTCAGAGTGCGGGTCAGGGTCAGGGAGCAGGTCAGAGTGCGGGTCAGGGTCAGGGAGCAGGTCAGAGTGCGGGTCAGGGTCAGGGAGCAGGTTGGAGTTGTATCGCGTCACATTTAACCCATTATAGCACGCCCTCCAAACCACCGCATTCCCCCCTCCTCCCGATAACAGCCCTTGATACACTCTCGCAATCTCACACTCACACTTACATCCCTGCTCAGTGATGCCCAGTTTGGGTTTTGCCAGGGTCTCTTAGCTCCTGACCTCATTACAGCCTTGGTTCAAACATGGACAGAGGAACTGAACTCCAGAGGTGAGGTGAGGGTGACAAGCCATTCAAAAACGGACAAAACAGCTCAATTCCAGGGT
TRINITY_DN18473_c3_g1	AGTAATAAATAAACTTCATGTGGCCCGGGCAGGTGCTGGAGTGTTGGCGACTGGGGGGAGGTTCGCAGTGAGCTGGTTGGGGTGCTAGATTCTCCCTTCGTGAACCCGAACGGGCGCCGGAGTGTGGCGGCTGGGGGATTTTCGCAGTGGCTTCGTTGCGGTGTTGATGTCAGCCTGACTTGTGACAGTAATAAATAAACTTCATGTGGCCCGGGCAGGTGCTGGAGTGTTGGCGACTGGGGGGAGGTTCGCAGTGGCTTCATTGCGGTGTTAATGTCAGCCTGACTTGTGACAGTAATAAATAAACTTCATGTGGAATAACTTCGGGTGCACTGACCTTAACAGGGGCCAGAGTGCAGCGACTGGGGGATTTTCACAGTAACTTCATTGCGGTGTTAA…
TRINITY_DN18473_c4_g1	TGCAGACTCCGCACAAACAGTGACCCAAGCCGGGAATCGAACCCGGGTCCCTGGCACTGAGACAGCAGTGCTAACCACTGACTGAATATCTTCTCACAGGTTGTGAAAATACAGCAATATGTGAGGATGGGAACATTTCCTTTAATGCAAAGCGTGGCAAATGATTCCCTCATTTCTAAAGAATGCATTTATGACTTTGCTATGTACAACAATGTTAAAAACCTCCCTCCCACCCAGGTCATGCAGCCATTTACAGTGGTCACATGCAATCAGTTATGCAACAAACAGTGTATATGATATTGAAAGCACAAATACTGGAATTGAAATGTTCGCGAGTGATGGTAGCTTAAATCATGGAGACCCTCACTGCTTTAATGTGGGGAAAAACAAGTATTAACA…
TRINITY_DN87072_c0_g1	GGCTCGAAGGGCTAGATGGCCTACTCCTGCTCCTATTTCTTATGTTCTGATCATCAGACCAATACTTTTTCCAAAAACAGATGCTTGGTATCACTTGAAAATAGAACTAAAGAGATTCATTACTGCAGCAGACTTTGTATGAGAAAGCAGGCACCTCTTTGTGTATTGTAATCTGAATGTATTATTGTCACATAATGTATTGTTTTGTAGAAATACTAACTTTTTAAATCAAGAACTGTGGAGTATATTACAAAAAAAATAAAGAATCC
TRINITY_DN87000_c0_g1	TTGTTTTTTAACTGATCGGCGCAACATCGTGGGCCAAAGGGCCTGTTCTGCGCTGTAATGTTCTATGTTCTATAATTATAGGTTTTCTTATCAATTACTCCCACTTTTCATTAGCTTTACATCAATCATCTTCATTATACATAAATCAACAATAATACCTGACTTATGCCTTAGCCAATTGCATCTTATCTCTGACATAAAGGTATTTTATTAGTCCATAGAATCCAGAAGCTAACTCCTGTCTTTGCTGACCCCCACTTCCTGTGTTGCCTGGTAACCTCAGATACGAGCCCAAAGTTCAAATGAACATTCCCATGGGTTCCCTTCAAGATCATTGCCAAACCAGACTAACACATGACTCCATGTGTAGGCATGCATCCACCTTGCCTGGGCAGTGAA…
TRINITY_DN87005_c0_g1	GGGGCAATAAACATGACCACACCTTATCCACCTATATGTCAAATTCAAACCAGTATTTCTCCTCTTTTCCTCCCCCTGCCCTAAGGAGCAGAAACACCATGGACTGGGATGGGCAGATGCTGTGCTGTATATTTTTATGTATTCCTATATATAACAGCTTTTCCTGACAGACCTTGCTACATGTTTTCAGAGTACATGACTGACATCTAGTGATAAAATTGAATATTCTAAATGTGGCAAGATTGAACGGCACAAGGAGGGTAACAATTTGAAGGAATGACTATGCTTCCAGCTATGGGTCAAAAAGCCAATTAATTATCTGGAATATTTTACACCATGCAAGAAGATCAACATATTTGTCTTGGCAGGGGAAACCACTACGGTGGTGTCAATGTTCCA…
TRINITY_DN87069_c0_g1	GCCTATTAACAATCTTCCTGCTTATATTATGTATAATTTATTTTATTTTGCTACACAGTCCACCATTACAGACAGTATTGTGCACAGCTGTTGTGCTGAGTAATAGTGAGTAATCTGGTTCAAAATTTATACAATGCATTTAAAATAAAATTGTACAGTTAACTTCTTTCTGGTGTACAGATCAATCCTTGAAGCTGCAACAGCTTCTGCATGAACACTCTTTTCCCAATTTCATTATGAATTGCAATTTAGACATCGATTTCCCCCAAC
TRINITY_DN98361_c0_g1	CACTAATAAATAAAAACAGGAGTATAAGCAATGAATTTTAAGTGCCTAGACTAATGTTGGATGTAAAGTTAAATGGAATAACACAATTCAGGGGAAATAGGTTTATATTGTGATACAATCCAGAATAATGATCTCACCAGCAAGAAGTTTACTTTCAGTTTAATTTTTTTTTTAGTGTTGTATTGAAAGGTTGAGAGAAAGAATTGGTGATTAGAGAGCTGTTTGTGATGTGCAAGTGGGGAAATGCTGAGAGACCAGTAAGCTCAGAAGGCCCATAGATGTACTTCAGTGTTGAGTGGCATCCATCAGAATAAGTAAATGAGCTAACTGAAACTTGGTTAGAGACGATTGCTGGAATTTTACCGCTTCACCCGTCCCAGAATCGGGGAAGGGGGGCAA…
TRINITY_DN98346_c0_g1	GTTATCTGACCCCAGATCTGTGGAAAGAGACCGTGTTTACCAAGGCCCCATACCAGGTACCGTGCTGAAAACTTGCTTTTCTTTAAGGAACATGATTTCTTTCAAAATGTGAAGAAATTTGAAAATTATTTTCATTTAGTTTGAAGTGATCCTTTGCTTTCAGTGTACCACAGCTGCTAATTTGTATTGTGGCATATCATCAACCTCTTTCCTTCTGAGGTCTTGTCCCCTTGTTAGAAAAATCTCATGAATCCTCCGGCAACATGGTTTATTTTGTATGAAAATTCGTTGTGAAGTCAACATAACCTGATTTTCAGTTTGCTTCATTGTCTAGCCCATCCTCTTAACAACAAGCCATGATGTCTGCACTCCTCAAATCCTGATCCCTTTGCATGCCCT…
TRINITY_DN98304_c0_g1	AATCCTGTTTTGGATGTGTCAGTGTTTTGAGGGGGGTGGGGGTGGGGTGGGGTGGGAACTGAGCGGTTTGCAAAGTGCATGCACTAAGCCCCTATATTGTACCATAAAATTTTGCAATTTGTTAAAAGTTTATTGGAAGAAGCTGTTCTCTCCTCACCTTGCGCAGAAAATAAATTGTAATTTTTATTTAGAATTTATTTATATATTGAAATTGTAGGAGCAGAGGTTTAAAAGATTTCTACACTTTGATTTCTGTGAATGTAAGAGTGAATGTAATGAAAATGCATTAAAATTTTCACAGGC
TRINITY_DN5630_c0_g1	TCAGCACCGACCCTCCCCACACACAGTGCGGCGCTCCCTCAGCACCGACCCTCCCCACACACAGTGCGGCGCTCCCTCAGCACCGACCCTCCCCACACAGTGCAGCGCTCCCTCAGCACCGACCCTCCCCACACACAGTGCGGCGCTCCCTCAGCACCAACCCTCCCCATACACAGTGCGGCGCTCCCTCATAACCGACCCTCCCCACACAGTGTGGCGCTCCCTCAGCACTGACCCTCCCCACACACAGTGCGGCGCTCCCTCAACACCGACCCTCCCCACACACACAGTGCGGCGCTCCCTCAGCACCAACCCTCCCCATACACAGTGCGGCGCTCCCTCATAACCGACCCTCCCCACACAGTGTGGCGCTCCCTCAGCACCGACCCTCCCCACACA…
TRINITY_DN5630_c1_g1	GGAGCCCCGCACTGTGTGTGGGGGAGGGTCAGTGCCGAGGGAGCCCCGCACTGTGTGGGGAGGTGGGCGCCAGGGGTTAGGTTGTGGTGCACTGCAGCCCAGCACAGTGGGAGGGGGATGTAACAGGGGTGGGGGGGTTGCTGCACTATGGGAGTCGGTGCAGAGGGATCTGCCCCCCCCCCCCCCACTCTCCCCTGTGGGATCTTGTGTGTAAAAGTGGGTGCTGCCTTTGAAAGGAGGGAGTGAGTTAGTTACAGTTCATTGAGTGTGGGAGTGCGTGGGGCATTGCGAATATCGTCCTGCAGCCTGGAATTTTAATATAACTGTGGTTATTTTACATTAACACTGCAATGTAGTCAGTCACACCTGTGTCTGAAGTGGTTTCTTGCGAAG
TRINITY_DN5630_c2_g1	GGGGGGGCCCACAGGGAGGGTGCCTGGGGAAGTGGGGGGGGCCCACAGGATGCGTGCCTGGGGGAGGGATGAGAGATTTGGTGCTTTCAGAAGTTGTCCACAGTAAGTGTAATTCCACAAGCCAGTGATTCCTGCTCCAAGAATTCCTAGGGAGAACTGTTCCCCAATCCACATTGGGCTGTGTACTGTGCACTTTGTGGGATCTTGCTGTGCAGTCCTGGAGGCTGGGTTCAGACCTGTTGAGAGTTCTCATTACCAACTCTCACCACATGGGACTTTAATAAGATATCCTCTTCACTCCACAATTAACTGGCCAATCCCATCCCTCCTCCAGAACCTGGGGTCAATGTTTTATTTAGCGTTGGATAATTGCGCAGAAAATAAACTGCTTTCCATTTA…
TRINITY_DN5659_c0_g1	GCGCACAATGGCCTTAAGTGCAATATTCGTGGATGTACAGATGAATAAAAGACATTCTGAAGAGATTGCACTGCGTAGGATCCAACCTTCTAGCTTATCGGTGACGGATAATTATTCCTTTATTTATTTATTTTGTTTTAAGGGGGTTTGGGGGGGGATCCACTTTGGCCCTGAACCTAGGATTTGCTACGTGAGCCTCTTGCTTCACCGTGACGCCAGCGAGGGAACTGACGTTATTATTATTGAACCGTCCACTGAATTCCTGGCTGACTGCCCGGTTACTGGTGATCCGTCACATCGCTGACTGTAATCCCGTCTCCGATCCTTCTCAAGTCCGGTAAATCCTGAAGGAAAATGAAGGGGCGGGGAAGTAGGAAATCTCTCCCCTATGACTTTCCC…
TRINITY_DN5671_c0_g1	CTTTTGGTTTTTGTGTGGATCAAACAAGGCACACTGTAAGATGTTTAGTTTTGTGAGCTTTAGAGGTTCTGGAGGGCAGGTTTGTTAAGTCTGAACGGTCTGAACAGGGCCAGTCTAGGTGTTTCCCCCTGTTTCCTGTCTTCTTATCCATGAATTGTAACCTGTCCTTAACAACCAACATGTTTTGTGTTTCCTGTGAACAGGTGGTGAAATTGATCAACAAGTTCTTGAAAAAATGAGGACACTGTTAAAAGCTGGAGGTTAAAGCACCGGCTGTATTCACACTGCAAGATCAATGGTTTGTTTTTAGAATGGCTACATTCTCTCACAACTGCTTATTTGAACACAAAAGGGAATTCAAAAATTAAGGCAAGACAAGAAAAACTATTTTAAAAATAT…
TRINITY_DN5620_c4_g1	AGTTCTGCACACATGAGGATGGTCTCTTGGATTCATGTCACACTATCTGTAATCCCCATTACTTGCCTGAGCTTGCAAAATCTCACTAACTGTCCTGGCTGAAGACAATACACATTTCTTTAACCTGTGCTTAACACTCCCTCCGCTCACATTGTCTGTACTTGATTATCTGTAAAGATTCGCATTCCAACCATTATTTTGTAAACTGAGTTTGTGTCTTTATATGCTCTGTTTGTGAACAAAATTCTCACTCACCTGAT
TRINITY_DN5615_c0_g1	TTTTTTTTCCTTTTGTTTGTTGTTAAGCCACGCATTTATATAAAAACAAGAGACTTTCTATGCGGGGTCATTTCTATTCTGATTTCATTGAATTCTATAAATTGAGAGCTTAGCATAAATGCTATATTACATTTGTTTTATATTTTATATGGCGCTGATGAATGTCAGTGCGCTAGATAGATAAAACATCGACATTTTTTATTTCTAGTAACTTGTTTAAGATCTGAAGATGAGGAAATCAAAAATGCTGTAAGAGATGGAAGTAATGTATTGCTGAAGACATGGAATAGACCCAAAAGACAAATATTGCACATGACATAGATCTTCTGAAATAAGTCAGGTATTGAATATGTGAATCAATTTCAACTCTTCTGTATTTTATGATTTATTTTCTACACT…
TRINITY_DN5615_c1_g1	GTGGGGGGTCGCTGTTTCTTGTGAACCAGAAAATGAGAAACTACTCAACACTTTGAAAGATTTGAGACTTTTTGTCAGTCGCTGTAAACTACCATTTGTGGAGGAGTGGGTGGGTGGGTTTCTCTCGTTTCAGACCTGAAGAGAGGGGTGGTTGGTTGTTTGGTGGGTGGTGTTGTTGCCTGGAGCGGAGCTGAGCTGAGGAGTATTGCAATGCATCACCTGTCCATCGTGTAACACGTCTGCAATGAGGAAGTGTGGCAGACCCGCAGCTCACACCAAAGCCGGCGCCCAGCCTGCTGCCGAGCCCGGAGCGCCAGCGGAAGCCCGCCCAACCTTCCGCGAGGGACAGTGGCGCTGGCCTATCGCGCGCCTGGCCAGCCCCCGGGCCGCCTTCCAGAG…
TRINITY_DN5681_c0_g1	ATTTTTTTCATCCCCACTCTCCTGCCTCTTCCTCATAACCCCTGATCCCCTTATTAATCAAGAATCTGTCTATCTTTTCCCCATAATCTTTGATCCCCTTAACAATCAAGAAACTATTTATCTCTATCTTAAAGACACACGATGACTTGCCCTCCACAGCCTTCTGTGGCAATGAATTCCACAGATTCACCACCATCTGGCTGAAGAAATTCCTCCTCATTTCACTTCTAAAGGCCTTTATTCTGAGGCTGTGCCATTAGATCCTAGGTTTGCCCACTAATGAAAACATCTCCACGTTCACTCTATCCAGGCCTTTCATTGAATGTGGAAGGTTGTGATGTGCCCAATCGAAAGGTGGGGTGCTGCGTCTTGAGTTTCCATCAAGTTTCATTCGAGTGG…
TRINITY_DN5681_c0_g2	CTTTAGTGTCCAAAGATGTGTCTCATCGAGTCTGCTCTGCCATTCAATCATGGCTGATATTTTTCTCATTCTCCTGCCTTTTCCCCATAATCCCCGATCCCCTTATTAATCCAGAAGCTACCTATCTCTGTCTTAAAGACACTCAATGAGACGGTAGTTTGCCCTCTGGCTATGTGTAGCCTCTGTTCATCGAGAAAAGGATTGATGCTACAGGGCATGTTGGTGGCGTGAAGAAAAAAACAACATGTCTGTCTGTTCCGGGTCTCTGTTGTCGCATATCCTTCACAAAGCCTGTCACAATTAGTTAACAGCGAATATCTGTAACTGCTCCACCCGATATTTTTGTGCCTTACTTCACCGCTTCCAACGCTCTCTTCACTTTTTTTTTGTGTACACTTT…
TRINITY_DN5690_c0_g1	TGTGGAAGGAAACCGGATCACCCAGAGGAAACCCACACAGACACGGGGAGAACATGCAGACTCCACATAGACAATGAACCCAGCTGGGAATCAAACCCTGGTGACTGGTGCTGTGAGGCAGCAATGCCAGCCACCCTGCCATCCCAAGCTTAATGGCCAAGTTTTCCAACCATACCCTTTGAGCTTGAGTCTAGCATCTGACAGCTCCAACCTGTGAACCACCTCCTGGTTTCATGCGCTTATTCTTGTTGACACGTTCCTAGAAAAGTTGGGTATTAACATGGAACAGTACCATATTCATGACCACTGGTAAACCAAAACCTCTGCTTCAGTGATGCAACTGAACCACGTTCTGTGCACTGACTGGCGCAGAGCAAATTAATTGCCAATTACCAGTAA…
TRINITY_DN5690_c1_g4	TGGCAGGTCTGTCATATGAGGAGAAACGAAATTGGTTAGGAATATATTTACTGGAGTTTAGAACAGTGAGAGGGGATCTCATAGAAACTTATAAAATTCTATCAGACTAGACAGGATAAATGCAGGAAGGATGTCCGTGATGGTGGGATGTCTGGAACAAAGGGTCACAGTCTGAGGGTACAGGATAGATTGTTTAGGACGGAGATTAGGAAAATTTTGTCACCCAGAGAGTGGTGAACCTATGGAATTTGCTACCACACAAAGTAGTTGAGGTCAAGCATTGAAAGTGTTCAAGAAATAGTTAGATATAGCACTTGAGGTTAAGGAGATCAAAGGATATGGGGTGAAGGCAGAATCAGGCTATTGAGTTGGATGATCAGCTATGATCATAATGAATGG…
TRINITY_DN5690_c4_g1	CTCAGGGAGAACAGTCACCCAAGGCTGGACCCAGGTCCCTGGAGCTGTGAAGCAGCAGTGCTAACTACTTGACTAGAGTGCTGCCCACATGTTTTTCTGGAGGGTGTGCAGAAAAGGCTTACCAGACTGATTCCTGGTGAGATTGATCTCTGGAGATAGGATTGTATTTGCTGGTGTTCAGAAGAATGAGGGGGAATCTTATTGAAACCAATAAAATTCTACCTGATCTAGACAGGGTAGATGCAAGAAGAATGTTCCCAATGGTGGAGGTTTCTAAAATGAGGAATATGGCAATAGGAAGGCATACCATACACAGAATTTACAGCTAAACCTAGAGTATTGTGCACTGTTTTGGTTCCTGTATTTGAAAGATGTAATGGCATTGGAGGCAGTTCAGAG…
TRINITY_DN5690_c6_g1	AAAGCTGCCCCACCTCTCTGTACTTTGGGAAACGCCTTGTTGCTGGAATTACTATATTGCAGTTACTCATTAGCTCCAGGGCCTAATGCAAATTGTTCTCTAGAGCTTCAAAGTGAGAACCAATCAATGGAGTTCAGCGCTGTTTATTTAGGGTTTCAGAGAATAATACAAGAAGCAACAATTTTCTCTCAATTTCGTTTTTACATTACTGAGTACCACTCCTATGTCTGGCATTTGTTGCTAGTCTTTAATTTGCTGTGGGGTGGCGGGGTGGCACGGCGCCGGGGACCCGGATTCAGTTCCCGGCTTGGGTCGCTGTCTGTGTGGAGTTTGTACGTTTTCCC
TRINITY_DN5663_c0_g1	CTGCGGGTCTCGGGTGCTGAGTTAGGGAGGCTCCCCCCCCCCCCCCCACCCCACCCCTCCACCACTCGCTTAGCGCCACCATTTTATTTTTTTTTAAATAGGGATGAAGTCTTGCCTTTTTAACTCGATGGGGGTGGTGGCTGAGGTGTCTACTTTTATCGATTTGTAACTCTAAAACTAGAAAAAAAACCCTAAAAAAAACCTCTTTCGTTTTTTTGTTTACTCGCATTTTTAAAAAAAAAGTTATTCCTCTGTCGAGCTCTTGGTCTCGTTTGACCCCCCCCCACCCGCAACCCATGAAGCCAATCATAACGCCAACTTGAGGGCTTCCATTTTCCTCTGCGTCTCGCGCACACAGACAAGATGGCCACCGGTGACAGTGGTTTCCGGATTGACAGC…
TRINITY_DN5606_c0_g1	CTGAGACAATGGGGCACGGGCTCGTTGGGCCGAAGGGCCTGTTTCCCGTGCTGTGTTGTTCTTTGTTCTTTATTAGGGTGATGAAACATTACTGTAACATGTTAAGTAGTAGTTCCCAAGATTTTTGAGTCTTCTGCCCATGGTTGAGTACATTAAATCCATCTTGTGTGGTATTGATCCATCTAGGTGTCAATTTTCAATAAGTTGGACTGAGTTAGTTGATCTCAGTTCTGGCTATGGTCAGGGCTCAAGAGGGAGCTCAAGGGGATAGATTAAAATTGGACGATGTTCCCAGTGCTATGAACAAAATTCTGCTGGCAATTCAGTGAGTATGTATGTTGGGGAAGACCGGTAACAGACTTGGCTACAATATCTTCAGCCAGCTAGCCCACCAACACT…
TRINITY_DN5644_c0_g2	GTCAGCACCTTCAGGAGAGGAGGGGACCCTGTACCCCAGTGAGAGTCAGCACCTTCAGGAGAGGAAGTGAAAGATGGATTGTTTTCTAAAGAAAACCTGTCTCAGTAGAAACTCAGGCTCTTTGGCCTAGGTATTGTCACTCCTGTAGACGTGATTTTAACTTTGATGTAAAAATCTCTGCTTTCTAAATTGTTTAAAAAAAAATGTATAGCTGAGTGAGACACTGGATTTCTGACGTGTTCATTTAGGGGAAGAGTTTGTTAATGAAGAAGATTTGTAGATTCCTGTGGTCTGTGAAGGGAATGGTTGAAGTATTTAAATCATTAACTAATCAGACTGAATGGGACAGACAGTGTGGATTGCCAACTCTCTAAAATTGAAGCTTGATATCTTGGCATG…
TRINITY_DN5667_c0_g2	GACCAGCTACATTTTCTTCCAGATCATTTATATGTACTACAAACAGCAGAGGTCTCAGCACTGATCCCTGCGGAATACCGCTAGCTCCATTCTGAAAAACATCCTTCCACCACTACACTCTATCTCCGAAAACCAAGCCAGTTCTGTATCCATCTAGTTAGCCCACCACAAATCCCCTGTGATGTTAGTTTTTGTATCAGTCTGCCATGTGGGACCTTGTCAAATGCTTTACTGGAGTCCATATAAATACATCTACAACCCTTCCCTCATCAATTATCTTTGTCCCCTTAATATCCCTTTAGTCCTCACCCACAGCAATGTGGTTGATCCTGATATGATCTAATAAGCCAACTAGGGATGGGCAATAAGTGCTGACCCACACCCAATGAATGAATAAAA…
TRINITY_DN5667_c1_g1	GTTTATTTGGTAGCAGAAGCCACCAGCTTTCGGAGCGCAGCCCCTTCGTCGGGTGGGTGGGAGTTCTGTTCACAGACAGGGTACATAAAGAACAAACAAAGAACAATACAGCAGGGAAACAGGCCCGTGAGATAAAGACACAAACTCAATCTTTGTGTGCCCTGTCTGTGAGCAGGGCTCGCACTTGGGGCTCGCACTTGCCTGGGCCTGACGACCTGAAGCGAGGGGAGCAACGCTCTGGAGATGGAGGAGCAATACTCTGAAGATGAGTGGCTTTTGCTACCTGTTGGACTGTATAACCTGGTGTCATGTGACCTCTCATTTTATTCAGCTGATATTATGCTTTACTGAAATTCCAGTGACTGGGAAGCCTGTTCCTTCTCCAATTCATGCAATCTG…
TRINITY_DN5667_c1_g2	CTGTAGGGAAGGAAATCTGCCATTCTTACCTGGTCTGGCCTAAATACGACTCCAGAGCCACAGCAATGTAGTTGACTCCCAACTGCCCTCTCAAAAGCCATTCAGTTCGAGGACAACCAATTTAAGTTATAGGGATGGGCAATAAATGCTGGCCCAGCCAGCGACGCCATATCCCACGAATGAATTTAAATTAAAAATTCATTGATAGCCTTCTGTCCATCGCCAGAACAGGAGTGGGGCTCTAAGCTGACAACCCTTCCAATAAGGAGGCAGACCGTGCCGGTTTACAATGTCCAGGCTAGGATAGACAAGTGGCTGCAGAGTTTAATACCCACAGGATGCACTGCAGCAACTCACCAAGTTTACCTCCACAGCATTCGACTACTTTCTTGTTCTAAT…
TRINITY_DN5667_c3_g1	CAAACGTGCTTCGACAATGTTCGCCACTGACAGACGCACGCCGTGAGGAAAGAGAGGTCGTGCGCTGCCAGAAATGGCCATACACGATCACAGGGCACCCAGCGCCAGAAGCGAAAGCGGCACAAGCTAAATAAGCGAGAACAAGTGTGGGGATGGAGTCTGAAACTTGCTCTTACCACTGCAAACATGCCACCTTCCCAGGTAGCGATTGCAGGGACATTGTCCATGGAATGCACAGGCTGTTGGATTCCGCTACACGGCGACGTCACAATGAGCGTGTCAGCTTCACTCTCAACCACATGGGGAGAGTCCGGCAGTCAGCAACACTCCCTGGGGAGGCAAGGCTTGCAATGGTATGGAGTTGTCAGTGATCCAAATGGAGAACTGGCGCTGATCACT…
TRINITY_DN5667_c7_g1	TTCCAACCATTATCTTGTAAATTGAGTGTGTGTCTTTATATGCTCTGTTTGTGAACACAACTCCCACTCACCTGACGAAGGAACAGCGCTCTGAAAGCTCGTGGCTTTTGCTACCAAATAAACCTGTTGGACTGTAGCATGGTGTTGTGAGACTTTTACTGTTTACTCCAGTCCAATGCTAGCATCTCCACATTGAGATTCCCCAGCCAGAAAAGACATTCTCCTTGTATCGGGTCTGTCCTTCCTAGATATCAACTATCCTTGGGTATTCATTTCCCAGCCTTGGGCATCCTGCTGCCATGTCTCTGTTGCAAACATATTGTATTCATGTATACCAATTTGTGTGGGTAATTTGTCTACCTTATTGTGAATGCTCCATGCATTAAATACTCCATCTTT…
TRINITY_DN5667_c9_g1	GCGTTGGAATATGTTTTGCTGTGGAAGGTCATAGAGGTTTGCAGCATGGAAACAGACCCTTCAGCCCAACAGGCCATCCAGTTTTTACCACTAAGCTACTCCAAATTGCCCACATTTGGCACCTGTCCCTCTATATCCATCCCATCCATGTAATTGTCCAAATGCTTTTAAAAAGACAAAATTAAGCCTCTGCTGCTGCCTCTGGCTGTCATTGCTGAGCCAGTCCTATCCTTTCCCGGATGGGTGCAGCTTAAAAAGCACACAAACTCAACACAATCCAGGACAAAGTGGCCTGTTTGATTAACAACCCATTTATACTTCAAATGTCCACTCCTCCACCGCCAACATAGAGTGGCAGTTGTGTGTACCATCTACAAGATGCACTGCAGCAACTCACCA…
TRINITY_DN5621_c1_g1	ATTGGACAGTTAAGTACACCCACAGTGCTGTTAGGGAGAGAGTTCCAGGATTTTGACCCAGCGACAGTGAAGGGACGACAATATATTTCCCAGTCAGGATGGTATGTGATTTGAAGGGGAAGCTGCAGATGTTGGTGTCCCATGCACCTGCTGCATTTATTCTTTAGCAATAGAGGTCGCAGGAAGAATAAATTTGGAAATTTGGAAAGAATAAATTCTTTGGAAAGCGCTGCTGAAGAAACATTGGTGAGTTCTTGGAGTGTATCTTGCAGCTGGTTCACTCTGGATAGTGTTGAGTTTCTTATGTATTGTTGGAGCTCCATTCATCCAGGGAAGTGGAGAGTATTCCATCAAACTTCTGACTGGTGGAAAAGATCTGGAGAATGTAGAGGTGAGTTA…
TRINITY_DN5621_c6_g1	CAGCGCAGTAACGTGATGAAATTGATTGACTGGCTTTAAAAAGATCTGCAACTCTGACTGCTCAATTTGGAAGATGAGAAACTTTATTTAAAACCCGGAGCTGAGCACCCCCTAACCCCAGGCTCTGAAGTTGGGCAACATCAGTATCTCCCCCATCTCTCCTGTATCCCAGGTGAGATAACCTCCTGAAAGTGGCAGTCCATGCGGTGTAGGTACTCCCACAGTGCTGTCAGGAAGGGAATTCCAGGATTTTGACCCAGTAACAGTGAAGGAACAGCAATATATTTCCGAGTCAGGATGGTGTGTAACTTGGAGAGAAACTTGCAGTTGGTGATGTTCCCATGTGCCTGTTACACTTGCTCTTCTCCTGGTAGACAGCACAGAT
TRINITY_DN5660_c0_g1	TGGGAATTGTACCTGGGCCCCTGGCTCTGTGAGGCAGCAGTGCTAACCACTGTGCCACTGTGCATTTATTAATGACTAAATATCTTTCATCACCTCAAACACATCCCCTGATCAAGAAATACTTTTAGAAGTATTCTACCTGAATCAAACCAAGACATTCCAGTGCAATTAAAATTTCTCACAAATTCAAAACTCAGTCAAAATCCCAGGCACTGTGAGGCAGCAGTGCTTACTACTATGTTGCCCATCTAGCTTTCAGCTCTGGATTCATTAATTCAATGCAAATTCCACCAGCTCTCATGGTGGGTTTTGAACCCGTGTCCTCAAAGCATTAGCCTTGGGCTTCTGGATAAGTATTTCAGTGACATTGCCACTGTATCACCATCATCCAGCCCTTTA…
TRINITY_DN5633_c1_g1	GCGCCGGTTTTCCTCCCACACCTCAAAGATGTGCTCTTATGCAGATTGGAAGTAATCTGGTGCAGACACATGGATTTGGGCCAGTGTCTGTGGGAGTTTGCGCATTCTCCCCGTGCTTGCTTTCTCCGGGTGCTCCGGATTTCTCCCACACTCCAAAGATTTGCTATTAGGCTGATTGGAAGTAAAAAATTGTCCCTAAATTAGTTTCCCTCAATGTGGATTGCTATAAAAACAATAGATAAGGGTCATGGGTGGACTGGTAATATTAAAATGGCGGCGCGGGCTCGTTGGGCCGAAGGGCCTGTTTCCTGGGCTGTTTTTGTTCTTTGTACCCATCTCCATCCGGGCGGATTTTGTTCTTAAAACAGGTTGCATTGTTTCTGTATAAAGTATTGGTCT…
TRINITY_DN5633_c2_g1	GTGATTAGCACTGCTGCTTCACAGCTCCAGGGACCTGGGTTTGATTCCAGGCTTGGGTCACTGTCTGTGTGGAGTTTACACATTCTCCTTGTGTCTCTGACCTCTCTGACAGAGCATCTTATCCAGACGTAACTGCAAGTGTTTGAACAGGATTCAGATGGAGAATGGGAAAGACCCTTCCAATAATCACATCACTTTCACTCAATGTCCAATCAGGATTAAGATCGACCCATGGGCTCTGAGCATTTCTAGGTTTTATGGGAAGCTCCGTTGTTTATATTCTTTGCTGTTTAGTAGCCCTGGGGATTTTGACCACATCACCCTCCCAGGCAAGTTAAAATCAGGTTTGAGGTCAAACTATCCCAGAGTTCAAGTCCTTGGGGAAAGGAGGTCAGACAT…
TRINITY_DN5662_c0_g1	TTTTTTTATATAAATATATAATTAAAGGGATTATTTACTCTGTCTCCTTCCAGTGGTGATGAGGCTCAAACTGTTAACTCTCTCCCCCTGCTCCCCAATGGGGTGTGGAGGTGTGAGTGAGTGAGTGAGTGCATGTGTGTGTGACCAAGCATCGGAAGCAAGGGAGAGAAGGTGACACTCTGCACCCATCTACGACACTCCTCACCACTCCGCCCACTCACATTGCACCTTCTTTGATATCAACTCCCTTCCCTCCCCACCCATCCCCCGCCCCACTCTGGCGGGAACAGCCACACCCCACTTACCCCCCAGTGCTGTCCTTGTCCTGATGCTGGCCCATCTTGTCCTCGCTCGTTCAGAAGCACGAGGAATGTCGCAAGGTCTGGACTGTGTGTGTGG…
TRINITY_DN5652_c1_g1	TGGGACTGGAGGCCATTATTTCCTGAAAAAATGATGGGTATTTTAAGAGGGCTCAATCTGTTCTTTATTTGCAGGACAAAGTGCCGATCGTTTTTGTTATAGATTTATGAGGAGGAGTAATCCAGAGCTCATTTTCATTCTGCCCCAGATATTACGACCACACGGTATAATAAATGGCAGCTGCTCCATGCTGTACAGGAAACCCAATTAAGACATCACCTTAATAATTCCAGCAAGCCAATTGTACATGTCTGGAAAGTCAAGATAGACGTGGGAATCTTCCGAGGCACCTCCTTCCCATTTTATTCCTTCTCTTCACAGAGACACTGTATCCCTGTTAGATTCAGCTACTGATATTTCAAAGACATTTTTCAAACCCATTTTAATAACACGCACCAG…
TRINITY_DN5699_c0_g3	GCTCTGGAGGCTCGTGGTTCTGAATGAACCTGTTGGACTTTGGCCTGGTGTTGTGAGACTTGTTACTGGGAGTAAACTATGGCATCTTAGATGAGAGGAGGAATCAGTGCATCCTTGTCTATCTTTTTGCTTGTTATAGAGCAAGCCTGGTTAGATGGCTACTGTGAATCACATCTACTATGTAGCGGTGATCTTATTAATTTGCCCATTCAGCTGGAAATGAAATTACAATCTATTCAATCCTCGTTTTGATGAAACTCCTTACTACTAATTTAAGTAGGTTGCCCTTCTTCAAAAATGTTCTCTACTGATAAAAAATAACTTTAGCTACTATTGACCAATTAAGTGGTGTCAACTTTTGTTACAATTTCTGTCACCAAATACATAGGAATTTCAAGA…
TRINITY_DN5651_c0_g1	GTGGGGGTAGTGGAAGGGGGAGGGGGTTGGCCCTCAGTGACATACTGTGTCAGGGAGCCAATGCAGACCCGATGGGCCGAATGGCTTCTTCTGCACCGTAGGGATTCTATGATTGCGACAATCTATTGCGACAGCTGCTAAGGGTACGTGAGTGCATTGCTGCTTTTATTTAATACTATTGACCAGAGACTGTCACTGAGTTACTCTGAGTGGCGAAAGGACGTTGTCTCAACTTGGAAATTTAACTGCGTGTAAGAATTTTTCACTTTGATGGCACTATTGTGTAAAAACAATCCACTTTGAAGCTGGTTACTGTCACGGGCTGTGTCACAATGAGAGGTCGCACTTGATTAGGGTCACGCCCCACCACCTTCTCTTGACCCTGGAACAATCTCACCA…
TRINITY_DN5605_c0_g2	ATGAAAAAGAGGAAAAAAACATTATTATTGTACCATATCCATTTACCTTAGATGAGCATTTTGCTAGAGATTTTCTGTCACAGCTTCATCAGAATTTTTCCGATCAGGTGCAATTAGTGATTCTGTCAACATTCAGCACTTTTAGCTAAGATCTCTTTTTTTTATTTTGGATTTCAGCACTTTATCTGACTTCCGCACAAAAACAGGTGGGAATACTTCAGGATACTATACTGATCTGGTGGTGGTTTTTTTCCAATTTTTCTATCCCCACCTCCCATCCCACATCCAATCCCGTCCTTTGGAACCTGGGGACATTCCTCCCAGCTTTCGGTTCCTCTGAATCTTATAACTCAAATACTTTTCTTAAAAAGTCACTTTCGCAAACCTGCAAAACGTTCT…
TRINITY_DN5654_c0_g1	GCAGACTCGATGGGCCGAAGGGCCTGTTTCTGCACTGTAGGGTTCTATGTTAACACAACCCAACATCAAACAGTAAACATAACACAATGTCACTGAATGCAACCCAACATCACAACACCAACCCAGAATAACCTAATATCACTGAACACAAACCAACATCAGTGAACACAATCCAACATCACAACAGCAAATAGTGAATACAGCCCAACAACACAACCAAGTGTCATTGAACACAACCCCACACCACAACATCAAATAGTGAACAAAACCCAATATCAGCCAAACATCAGTCAACAGTGAACACAACCCAACATCACATCAGTCAACCGTGAGCACGACCCAACATCAGTCAACTGTGAGCACGACCCAACATCAGTCAACTGTGAGCAGGACCCAACA…
TRINITY_DN5682_c1_g1	GTGGGAGAAAAGCAGAGCACCCAGAGGAAACCCGCACAGACATGGGGAGAATATGCAAACTCCACAGAGACAGTGACCCAAGCTGGCAATCCCAGTGATTAACAAAGAATTGCGCCACAAGATTCCACATTTTTAAACGAGAACAACATTTATAAAACAAAATAATATTAAAAACCCGGACTATGCTCATAGCATAAGTCTTTCAATTTTAGTCATTATCAGATTATTTCATGAAGAGAATATTAAAAACTTATTGTGGTTGTGAGAAGAGGGGTGTCTCTATATGTAATGCTTTGTGCAAAAGAAAGAACAAATCAAAGAAGATAAAAATATGATTTTTCCAAGACATTGTTCGTGTGAATGTTTTGTGATCCGGGTTAGGACATATAAAGAAAATTG…
TRINITY_DN5682_c3_g2	GCAAACTCCACAGAGACAGTGACCTGAAGCTGGAATTGAACTCGGGTCCCTGGCGCTGTGAGGCAGCAGTGCTAACTAGTTAAATAAATGGTCAATAAAAATAACATGAAGCTCTGTTATTGGTGACTAGCAGCATCATGTATGCAGTGGTGTTACAAAGTCCCTCTTTTAATTTAAGGACTATCCATCACTGGTGCTTCTGTTTCGCAAGAATGCAGAGAATAATGTAAAGGGACCATTTGCAATTGTTACGATTTACAAAAGCACGCAAAGATACTGCGACAATGATTTCTCCGGACTGCACCCATATCCTCAGGCCTTTAGTTTAAACAACAGGTCAGGTGTTGCAACTCAAGAAGGGTGAAAAAACTTAACACCATTCCCATCTCTGTTCACTGT…
TRINITY_DN5682_c7_g1	CTTGGAGGTCCGAGCAGGTCTCAATGATCTCTGAGCATGTGGCAGTGGGAGAATGGCTACACAGGTGCCAATTTTCACCACAAAACAGCCCTGCCACGCATGCACAGTTTGTTTCTTGTATATTTTCAGCTGGATTATGTTCGTATTCACCTGTGCAGAGGAAGAAACAGAAGGAAAACAATAAAGAAAACAAAACAGTCTGAAAAAGGTCAGGTGACCTAGAAGAGGGGTGCCATTCCAAAGGGAGTTCCAAAAGGAGAAGGACACAGGAGGGGCACAGAAAGACACTAATGGTCAATTTAGCATGGCCATGCACCTAACCCGCACAGCTTTGGACTGTGGGACAAGACTGGAGCACCCGGAGGAAATCCACGCAGAGGTAGGGAGAATGTACAGACT…
TRINITY_DN5616_c1_g2	GATCGGCCAACTCAATAGCCCAATCCTGCTTTCTCCCCATAACCTTTGATCCCATTCGCCCCAAGTGCTATATCCAGCCGCCTCTTGAATACATCAAATGTTTCAGCAGTGGTGAAATGGTTTTGGATGGGCAAGTTGTTAGAGAGGAAGGACCCTAAAGGACTGATGGGAAAAGGATAAACCTCTGTGAAAGGCCTAGAATTAAGACTTTTCCTTCGATGGGCCCCCTCGGGACATGTTTAAGGCTCGGTGTCTTATTAAGATTATTGAGACAATTATTCATCCATAGAAGGAAAATGATCCATTTGCGTTTTGCCCAAGGGTGATGGTGTCAAAAGTGCACTCTGCTTTGGACGCCACTGTGGGCGGAGGGGGAGAATGGGGCTGGGGGTGCCAGTG…
TRINITY_DN5614_c0_g1	CCTGGATGTACAGGCTGGGGTTCGGGGCCTCCGAGACACTGGGAGGAAAGTCTGGAGTCCAAGATTCAGTCCGGGAGTGAGAATATCACCTTGGCTACAATCTAAAAGCGGGTGGCATCCCACTAGCCGCCTGATATTCACTCTGGTTGAAGAAGGTGATAGATACGCATAAAACTGTGATTAACGAAGCAGGAGACCTTAAGACAGAGGAGCAGAAGTGGACCATTCAGGCCACCGGGTCTGCCTGGCCTTTTAATGAAGTCATGGCTGGTTTGATATTATCCTCAACTCCACTTCACCATTTTATCCCCATAAGTCTCGCTTCCCCTGCCTAACCGGACGATCTTAAACGTGTATGAGCGTCCCATTTGTGAAATAACCTGAGAGCACTGTGTATCA…
TRINITY_DN5656_c0_g2	GGGACTACAGAGCCACAGCAATGTGGTTGACTCTCAACTGCCCTCAGGCAACTAGAGATGGGTAATAAATGCTGGCCCAACCACGGGAACATTCCCGTGTTCAATGAAAGAATAAAGAGTGACCATTCAATTGTCGCTGACCGCTAAGATTCTGTTGTTCTTGTTAGTTTTCACATTCCTCACTAGTTTGGCCTTGTAGTTTATTTTTTCTTTTATAGTTTCAGTCATCCTACACTGGATTAGGAATTTATTCCAATCTGTGGGTCTATCACTACCCTTTGCCTAAGTATAGGCTTTTTCTTACTCTTTTTAACTTCCAGTCCATAGAATCAAAGAATCTATGGCCCTTCAGCCCATGCTGACCAAAAACCCCATCTAAGCTAACCCCATTTGTCTGCA…
TRINITY_DN5656_c1_g3	ATTTGGACGGGGATGGGAAAGGTTTAGAGGGATAGGGGCCAAATGCAGACAAATGGGGCTGGTTAAAGTTTAGGAAACCTGGTTGGCACGAACGAGTTGGGCTGAAGGGCCTGTTTCCCTGCAGAATACCTGAGTCTAGGAACTCGAAGGTAAGGAACTTACTTGACCAAGAATGAGGGATGGTGGGACTGAGCACGACTGCTCTTCCAAAGAGCTAGCAGAGATTCAATGGGCCAAAAGGTGGCCTCCTTCTGTGCCACAAGAGAATGATGTTGGGCACCTAAAGCAATGCCTTTCCACTCACTAGTGCCCACTGGTGGCTGAGACTGTATTCTGCATGTTGTTGCACAATCCAATTTCAGTCACCAGGTGGCTCTGTTTAAGGTCAATACAGTGTAG…
TRINITY_DN5655_c0_g4	ACTAGATGGGCCAAATGGCCTCTTTCTGCACTGTAGGGTTTCTATGATTTCTATACTGGGACGGCACAGTAGTTAGCACTGCTGCCTCACAGCACCAGAGACCCAGGTTCAACTCCAGCCTTGGGTCACTGTCTGTGTGGAGTTTGCACATTCTCCCCATGTCTGTAGGTTTCCTCCGGGTGCTCTGGTTTCTTCCCACCGTCCAGCAACGTGCAGGTTAGGTTAACTGACCATGTTAAATTGACCCTCGTGAGAGGGGGATTAGCAGGGTAAATACATGGGGTAACAGGATAGAGCCTGGGTGGGATTGTGGTCAGTGCAGATCGATGGACC
TRINITY_DN5632_c1_g1	GGCGGTCTCGGCGGGGGTCTTGGGTTCATGTCGCACTGTCTGTGGCCCCCGTGGCTTGCCTGGGTTTGCGGCCATGACTTGCCTGGGTTTGCAAAACCTCACTTACTGTACTGTCTGGAGACAGTATATGAACATAAGCAAAAAATATTTGAGCATTACCTGCTTTTGGTAACAGGGTGGATGCACATTTTGGGTGTACGGTGAGTCTTCTCATGATTCCTGCTAGTGCTTTAAAAAGTCACGCACAGTGCCTACAACGATACCCTTCCAATGCAGGACTGTGCTTCACTGTACTTTCCCAATATGTTTCTTCCACACTAGTAACCTGAGCTCTGCTTGACACCTCATTTCGTGGGAGCAGGTTCTCATGATTCCGAAGTCCTGCTCGTGCTTTGAGGA…
TRINITY_DN5632_c2_g1	TCGGAGCTCTCCGTTCGCCTGGCGGAGGGGCAGTCCCCTCGAGGGCTTGTGAGGATATTGTCGGGTGAATGGGTTGGACTGGGGCCTGGTGTTGTCAGACTTTTTACTGTGTTTACGCCAGTCCAACGCCGGCATACCCACATTATTCCAATTTTGCCAGAGCCTGTTGTAAAGGAATCAAAGAAAGGAGCCTTTGGGGATTCTGCACCTCAAGATTGTTAATGAACCCAGCTGGAGAGCAGTTCTGCAGAGGTGTGCTGTTGGAGTGTTAGTTGCATCAGGGAACTTCGGATAGGATACAGATACTGGTGAGAATGACATGAGGCCAAATCCACCGTGTGGGAAGTGAGAGATGTTACATAGTAGAGGCCAAGTTGGAAAGACAGATTACATTTCTGG…
TRINITY_DN5632_c15_g1	AACCCCGCCCCCTGCCCCCAGTTACTCATCCGGTTGAGTGACAGTAAAGAGGGGAGCTCTTCAGCATTGCATTGCATTGCAATGATGTTGTGCCGGAGGGAGAGGAGGTAGCGAGAGCAGGCTTCACTGCGTATAACAGCCCGGTGCAATGCAGCTTCAGTTCCAATCTTTGTCGGACTCTGCTGACCTGAGCATGTTGCGTAACATGATACGTGCTTCTGTCAACAATCGCACCATCCTCTCCGACACAGCCACACAAATTGCAACTATATTTATGTACAGTGGTACAGGTTGTTCTGTGTTCCAAAACAATAAAACGCCCCAGGGTTAAGATGACATTGAGAACATTACTTCGAGTCGGTCTTGTGGTTCATGACATCATCTCAACCTCTGCATGGC…
TRINITY_DN5666_c0_g1	AACGCTGCACAGAGAGTGACCCAAGTCAGGAATTGAACCCTGGTTCCTGATGCTGTGAAGCAGCAGTGCTAGCCACCGTACTCCCCCAATAGATCACCTTTCTAATTGCAAAAGATTAGGTTTGTTTTGATAATTTAACTCTATAATCCCTGGGTACCATTCTATCTGTATCCCATACTACCTCTGGCGTTAGCACGTCTTTCCTGAGGATGGAGCCAAAGCTCAATGTAGTATTCTCGGAGGGATCTGACCAAGAGTCTGTACAATGACTAGTGTTTTTCTACTTCAACCAACTTGAGATGAAGATCAACATTCCATTAACCCATGAATGTTTCCTGCACTAGCTTTAGACCCTCAATCCCTTTGTTCTTGCACAACTCTCATCACCTCAACTGCCTC…
TRINITY_DN5692_c0_g1	CTTTCACAAGGCGCATCAGAGCTTGAAGCTGCAAGGATCACTGCACTGAAATTGTAAACAGGTATGACAGTTCATGGGGAAAATATAGCCTCTATACAACATGTTTTATTCAGTGACTGAAAGTTGTTAGCTGCATTGTGGAGCTCAGTAGTGAAGTTGAAATGTATTAACTTCGGTTGGTAAATACCAAAATGTATTAACTTCAGTTGGTAAGTACTATACATTAATTGTAATGTTTGGCATAGTTGGTCACATTACCTAAAGCAACCAGAGTTCTTGTATCTGGTCTGTTGCAACAAACCAAGGCAACCAGAGTTCCTGTATCTGGTCTGCTGTGGCGATTTGAGGCGACCAGATTTCCTGTATCTGATCCGTTGTGGTAATGGGACCATAAAGTAA…
TRINITY_DN5692_c0_g2	CTTTCTGTTCAACTGCTATGTGAAAATCAATGACTGTAAATCATTTTCTGAACAGGACTGTTTGTCAGCTGAGGTAGTAAAAGTTGTAATGCTTAAGTTCTGGTGTGCATCTTAGATATAATGTAATGACTTTTCTATAAAGATGTCAAGACTACTCGGAGTAAATCACTTCCTGCCACCCCTTTCACAAGATATGTAGTTTGGTCTTGATGGCACACTGGAAAAATATCCCTGTAGAATTGCATATCCTGACTATAAAATGGTGAAAACATTTAGTTTCAAATTTTAGGCAAATAAAAGTGCAGTAGTTTGATCAACAATAATCTGATTTCTGGCCAGATTTACTT
TRINITY_DN5607_c0_g1	ATATTCTCACAATATTGTGGGAGTGTTGTCAGATGGATCGGTGGGGCTGGGGCCTGGTGTTGTCAGACTTTTTACTGTGTTTACGCCAGTCCAACGCCGGCATACCCACATCATGACTGTGATTTCCAACAGCTTCCCAAGAGCAGAGACTCAAACACAGTTTCTATTCCTGAAGCAAATGCTGAACACAGCAATCTGCATGTGTGTGAATACAGACATTCAATAAGAATAACAACCTCTTACTCAACATATAAAAACCCTGTCTACACCTGGCTATCTAGCCTTACGTGTAGCTAACAGCCACCTCAGTGAGGTGCTTGGTCTCTGGATCCATAACCCATGAGTTCCCTTCAGGAGGGGTGGGACTGAGGGCTGGGGATAAGACTGTGTGTTTTGTTT…
TRINITY_DN5607_c0_g4	CCGAAGGGTCTATTTCCCTGCTGTAAACCTCTATGACTCTATAATTCTTTGATTTGATTTATTATTGTCACGTATTAGCATACAGTGAAATGTAATGTTTCTTGCACACTATACAAAGCATGCTGTTCATAGAGAAGGAAAGAATCATAGAATCTACAGTGCAGAAGGAAGCCGCTTGGCCCATCAAGCCTGCACTGACAACAATCCCAC
TRINITY_DN5607_c4_g1	GACAGTGACTCGAGCTGGGAATCGAACCTGGGTCCCTGATGCTGAGGCAGCAGTGCCAACCACTGTGCCACCCATGATCTCTATGAAGGCATTAAACCACGATATGATGGGATCTCTGCTCCAGGAACAATCTCAGAGAGGGTCAGCAGCCACCAACATGAGCTGAGACCTGTCCAACACTGAAGTACAATTCTGCCAGAGTTTAGAGTCACTTCTCCTGCCCCACCCCAGTAATCCAAACTGGAATCACCCATTAATAGGGATGCTATCCAATATGTTTAATTGTCTTACAGACCTCTCACAGGTCACCCTATAATGCAACTAAATAAGTAGACTGAATTCCTTGAGTCTAACTTTAACCTGGGGACCATTGTGGAACCGCAGTCCTTACTAACCAAT…
TRINITY_DN5607_c6_g1	CTGAACAAAGTTTTTTTTTAATGAACCAATTAATTACAGAGGTCAGTTTACGGCTATGTCTGTTTAAAATGAAGAGCTGAGCTTCAAGCTTTTAACGCTTAGAAAACTATACTTGTACAGCTTTCGGCAAAATGATAGTTTGATTTTAATCTCAAATTGCCTCTATGCAAAGATATTTTTGTCCATTGGGTCTAATAGAGAAAAAAAGGATTACCAGCTGTTAATCTAATCTGAAGTCTTGTGTTGCTGTCCTCCCTAATGCAGGTCATAAATTGAATGTTCATTCAAACCAGGAAATTCCAAGAATTATTTATTTGCTGGTTTGTGCTGTTATCTGATCTCCACTAGGTTGGAGATCAGATAACAATTCTCCTCACACCTGAGTCAAGGAGAGAAATT…
TRINITY_DN5617_c0_g1	ATGCACTTTGAGCCTGGGAGAGCACATTTCCACTGAAATGATCCACAAAAGCTGGTGAAGGACATTTATTTTATCTGGATAGTAAATAGTGTTTCCCTTCCACTGCAGATAGATCTAAAATAAATACAAAGATTAAATGACAAAAATGACCGGGAACAAAAGCAAAGAGAGAGATAATGGCTGGAGTAAAGAAACAAAGCCCAGAGTAGATTGGTTAGAGGGTGGGTGAGATTAAATGACGAAAATGTCCTGGAACAAAAGGCAAAGGGAGAGGTAATGGTTGTAATAAAGAAACAAAGCCTTGGTCCAGAGTGTGAAGTTGTTGAACTCAATGTTGAGTCCAGAAGGCTGTAAAGTGCTTCATTCTCTGTGCAACATCTGGGAGGAAATCAATGTCTC…
TRINITY_DN5617_c1_g1	CAGAACTGAAAAGGGATAGAAATGTGATGAATTATATACTTTGGGGGGGGGGGGTCAGAATGGAAAGATAGTGATAGGCCAGAGTTGAACAGGAATTGACAAAGATTTCATGGACATGAGACAAGAGATTGCTATTGGTCCATTAGGGGCTGAAGAGTTAATAATGGCAAAGGTAGGACAGCAGAATATGTGAATAGGAGAACAGTGGTCAGTGTTCAATGGGAGCAAACCCTAACAACAAGGAATAGTGACCCTGTGGGGGAGGGGTGGGGTTATGTTGGGACAAGCGGGACAATTGAACAACAGAAAATGAAAAGGAGTGGGGGAGTTGAGATAGAGGGGAAGGTCACATCTAGCACCCACAGTATTTTGCTTTTATTGGATTAAATTTGGCTGCTT…
TRINITY_DN5628_c0_g2	AGCTGAGGGCGGGGGGGGTCCCTGTTCAAGGGGGTCCCTGCTGTCAGAGGGTCCCGGTCAGAACTTGGGGAAGATGTTCCCGCTTCCCTAACAGTTGGAAGCAGAGGCACAGAGTTCCCGGGTATGAGGGAGATTTATTAGTTTTCAATTATTGTTTTTTAATCGTGTTTCTGAAGTTGTGTAATTTCTAAACTTTATCCCGCCACATGAACCACACTGAAGCCAGGAGCTTGTGAACTCCAGGCCTCTGCACACTTTTTTTTAGCCATTCTAAAACGTTAAAAGGATGAAGCCTGGGCCCTGTAACAGTGACAATCAATAGGGATCCCACTAAAAGGATTCACTCACTTTAGCAGCGGTTTCGGTTGAGATGCCGTGTCTGATTCGGATTCAGGCCCA…
TRINITY_DN5631_c0_g1	TGGTCACAAGTTTAATTGGGTACAGTTCTCCCCCTTCCCCTCCCCCCACCCTCCTCCCCATGATCCCACTCACTCGTTTTGGGAGTGAATTAGGTTTGGGCTCTGCATGCTTGAGGCATTATAGGTGAAAAAATCCTTTTCCTTCAGTTGACTGTCGGAAGGTCGTACTTCGATTCAAGTGTGCTGCTTGTCAGGAGGCCAGTTGTTTTTAATCCTCAGAACACAATGGAGAAAAGTTGCTACCTTTTTGTGAAGGGGAGCTGGTAGGAAGTACCATTCTTTTCATGGTCCTCTTACTTTTCAGGAGCATTGTAAAATAGAATTGCAACCCATTTACAATAGAATCTCTTTGGACTATTCTGATTTTCTAAACAGTTGAGGCTTGTACTGTTTATCTTT…
TRINITY_DN5657_c0_g1	GGGGTTACGGGGACCTGGCCTGGGTGGGATTGTGGTCGGAGCAGAATTGATGGGCTGAATGGCCTCCTTCTGCACGGTAGGAATTCTATGGTGAGGTCTGTTGCTTCTTTTTCACTATTGTAGTTGCCTGTACAAAAGTAAAGATGGTCACGCAAACATTTTTGATTCCAACATTTTATAAACCTGCATAGAAACATTTTTGATTCCAACATTTTATAAACCTGCATAAGAAACATTTTTGATTCCAACATTTTATAAACCTGCATGTTATCCTGGCAGCTTTTGTACTTCATGCTGGATTGTCTCCGGTTAAAAGTATAAAGGACATCAGTAAAGAAAGGTTAATGTTGTTGCTAATAAACAGGTGGCAGTAGGATATTCTAGATGGGCTACGTATAG…
TRINITY_DN5657_c2_g1	AAAACACACTATAGAAACGCTACAGTGCAGAAGGAAGCCATTCGGCCTATCAAGTCTGCACCGACAACAATCCCACCCAGTTCCTATCATAATCCCATGTATTTATCCCACTAATCCCTCCAATTTACAATCCCGATATGTCAGTTGGGATCAGTCGGGGATTATGATCACTGTTCTGGGCGAGAGCTTTGTCCAGTGTTCTGTCCAATCACCAATTGGTTATCTCTCCATAATAGTGTTGGTTTTGAGATTTTTCCATTTGTTTCAGATCTCCAACGTTTGCACGTCTTTGTTTATTTTATACTATGTTATTTCTTGGAATTTGAAAATTCGAGAAATTTGCTGAAAGTTACAAGATGTGTAAATATTTTGTTCAATAGCCACAAAGTTCGAACTGTC…
TRINITY_DN5657_c7_g2	TGACTAGGGCGTGCAAGACCGGAGAATTTCATAGAATCATAGAATCCCTACAGTGCAGAAGGAGGCCATTCAGCCCGTCAAGTCTGCACGGACCACAATTCTACAGGCTCTATCCCTGTAACCTCATTTATTTATCCTGTTAATCCCCCTGACACGATGGTCAATTTAACCTAACCCGCACACCTTTGGACATTCCAGCCTACGTTCTCTCGCTCCACAGTTGCTGCCTGCCTGCAACACACTTCAAGGGCCTGATCAGTGACAAGAGTTGCCATTTAAAAACACAGAAACACAGTCAAAAACACAAAAGCTGCAATGCTTAATTATTGCGATCACTCGCGCGCCAAACATCACAAAGTAAAGACAGAGATATTTATGGATTACTATGCAATGTCATTT…
TRINITY_DN5642_c0_g1	GACCCCCCCCACCATCCCGGGGGTCAGAGTGGGACCCCCTCCTCCTCCTCCTCCCCCTCCCCCCTGGGGGGAGGGGGTCAGACTGTACTGTGGGGTGAGAGCTGTGCCCCCTCCATACCCCCCCCGGGGGGTCAGACTGTACTGTGGGGTCAGAGTGGGACCCTCCCCTACCCGACCCCCCCACCCCTCCCAAGCTCTCTCTCTCTGCCCCCTCCCCCACCCTCTGTGACGGGCTGAGTGGGGGTTGTGGGGGTGGTGAGTGAGACTGGGGAGTCTCCCCCCTCCCCTCGTGCCCGCTGATTGTGAGAGTTTTAGTTTGATGGTTTCCCCACTCATCGCGCGTCTTTTTTAAAGTGAAATGTATCGTCTCACCCCCCACCCCAGCCACTGGCACCCCTC…
TRINITY_DN5675_c0_g1	CCAATGCCCTATACAGCTGCAGCAAGACCTCCCTACTTTTATATTCCCTGAGTCTGCATGGGTTTTCTCTGGGCGCTCCAGTTTCCTCCCAAAGTCCAAAGATGTGCAGATTAAATGGATTAGACAAGGTAGATTGTCTCTTCGTGTCTCTAGATGTGAAGGTTAAGAGGGTTAGCCATGGTACAAATGTGTGAAAGATATTCTTTCTGAGACTCAGTGCAGACAGAGTGGGCTGACTGACTTCCTTCTGGACTGTGGAATTTGTATGGATCCGATGGATACTCAGTGCTTCCATTTATGTACCAGTTGTATATTTACCTGAGTAATATAATCACCTCTGTAACGTTCATATTAACTTCATCAGGCACCTGATGAAGTTAATATGAACCGAAGTTAATA…
TRINITY_DN5653_c1_g1	GCGGTCTGTAGAGTTTTGAGCTTAAGGGACCTATTTTTTTTTTAATCAGTGGCGTCCTTCCCAAGGCAGCCCCTTCCTGTCCTTGCAGAGAGAGAGCGAGAGAGCAGCCGCGAAGGTCACAGCTCCGAGTGCCGGGGACGGGGGTGGTTGGGGGTTTAATGTTGGCCAGTCCTGCGATTTGTTCCAAACACCTCTCCAGCCAGTTGCACCCGAGCGATCGCAATAGCCTATCAATGCACCAACTTTTTTATTCTTTATAGGCGTGGCTGGCAGCATCTGTTGCCCACACCTAATTACCTCTGAACTGAATATAAGAACATAAGAAATAGGAGCAGGAGTCGGCCATCTAGCCCCTCGAGCCTGCCCCCCCGAT
TRINITY_DN5696_c0_g1	CCCCAGTCAAGCAACAATGGTTCAACACACACACACACACACACACACACACACACGCACACAAAAATACACACCTGAATTTTAAGGAAAAAATAAACTCTTTGACAAACTAATGTACAAGGCATAAAGACACAACAGGCCTCTGAGCAAATTTCCGTTGTGTCCGGCACAAGGATGGCGATTTTGGATGGGGAAAGACAAAAAAACTTCACGCGAGAGTCACACAAAGAGAGAGTTCCGAAGACAAAGAATCCTGGACGAGTGAAAGGGATGGGGAGCGGAGGAGGAAGAGAAGAGGATTTGACCAACTCAAGTTGAGGAGCGAGCGAGGGAGGGAGAGAGAAAGAGAGAGAGAGAAAAGGGAGAGCGGGGAAAGGACACGGGAGAAAGTTGGTGGAA…
TRINITY_DN5629_c0_g1	GGGGTGTGTGTGTGTGTGTGTGTGTGTTGGGGGGTGGGTTACTGTCAAGCCAGCGGCCAAGTGCTGGGGGGGGGGAGGGGAGAGGTAGCTTGGGAGTGAAAGGACAGGTTGGGCGAGGGGTGTGTTTGGGGAGGGGTTTGATTCATGGGGTGAGTGAGAAAGTCCCGGGTGCGGCGTGGTTCCAGCACGGCGCTCCCACCTATCTTTGCCCTCCTGCGTTCCTGTTTCTCTTTTTTTCTCTGCCGTTATCGGGGCCCCCTGTGAACGGACTGTGGCTGGCGGGAAGGACTGGGCAACTCCCCCCCCCACCTCTTCCCCCGGGGATGGGGGCGCGAGGGTGTACCCAAGTACCAGGGCCTCTGTGGTGTGGGGGTTTGTATTTTAACACTGCCGCTGAGG…
TRINITY_DN44372_c0_g1	TGTTAATTAAGGCCATCAAGTGGCAAATTAAGGGCCGTTCCCACCAGGGCTGATATTTTATCAGCAACAAATGGATACCTTGCCACCTGGGAAGGTTGCCAGTTAAACCTGTTGTTCGTGCAAGCTCAGCAAGGGCAGATGGTCCCTACAGATCGGGACCATGTGTCCCACGGAGAGTGGAAAGTGTAGACCCATCTGAATGAGTCCCTCTCTCCCCCCACCACATCCTAATGATCAGCCTCTCCTTGTCCTTCTGCTGGAACTAGCCTGATTGACCCTGATGAGCCCCAACAACGGATACCTTTACACCAGACTTCCTTGATTGTTTCTGGTTTGGGAACAGCTGCAGTACCGCAGGTGCCTGCTGCTCCTGATGGTATTGCTGGGACCGGTTAGCTG…
TRINITY_DN44356_c0_g2	TGTACCGCAAGAACTAACAGGCAGAAGAAAACCGCACATTCCGTCAAAGTGTCAGAATTCAGGACTGCAAGGTTGAAACATTACATGTCCTGCAGTTACCTACATGTGATAACATCACAACATCCTGAAGCTAACTAACCAGTAATTTCCATCTGCAGCCTTGGGGCCAGATTTTATCATTGCGTATCAGGTGTGAAAGTGTGGTTAAGTTGGGTGTGAGGCCATTAACACAAT
TRINITY_DN44355_c0_g1	CTTCTTTGTTGTGCCTGTTCAGTTTTGGCTTCCATCGGCAGAGATCAGATCAAACCACTCCACTCCAATCTTTTTCAATCATTCCCTGCATACTTGGATCTTCTTCGATTTTAAACCATAAGAGCTAGGAGCCAGAGTAAGCTATTTTCCCTTTGTGATTGCTCTACACCATCCAACAAGATCATTGCTGACCTTCCTGTATCATCCCCCAATTCTCCCACTACCAGAGAATTTAGCAAACCCTGTCTTGAATATACTCGATGACAGAGAATCCGCAGCCCAGCTAAATGGAGAAGAGGTGGAACTGACGCTATGAAGTCACAGAATAAGGGTGTAATGGGACTGCCAGAGTGACAAGATGGCTTTTGCGATGCGACCCATTGATCTCGCTGTTCTTCT…
TRINITY_DN44380_c1_g1	GGGGGCGCGACGTTTCTCGCCTTTCTTTCTTCTACCTGAGTGATGCCTAACGGTGACCCAAATGATCTTGGTTGCAGTAGTTGACCTTTAGTAGTACTTTGGACAAGATAGCCTGCTTCCAGCGGCAGGCAACTCTGGTATCTGTGATGCTGGTGTGCAGAATGGAAACTCCAGAGATGAGCTTCTTGAGTGGATTCCATCTGGAAAGTTAGGCCAGGCAGTGGATTGCTTGGGCTTGGTGCTCTCAAAGCAGCGAAACATACAACAACGACAAAACCAAAGCAGCGAAACAAACAACAAC
TRINITY_DN44380_c2_g1	TATGGGGGGCGCGATGTTTCTCGCTCATCTTTGTCCTTTCTGAGGGATGCCTAACGGTGACCGAAATGATCTTGCTTGCAGTAGTTGACCTTTAGTAGTTCTTTGGACAAGATAGCCTGCTTCCTGCGGCAGGCAACACTGGTATCTGTGATGGTGGTGTGCAGAATGGAAACTTCAGTGATGAGCTTCTTGAGTGGATACCA
TRINITY_DN44322_c0_g1	TCACCCCCCCCCCAACCTTAGCAACCGGCATCTCCGGTACAAAGCCCGAGCGGGAGACGCCATTTCCTATCTTAACCTCCCTCCCTCTTTATCATTCTTCACCAAGATAAGATATTAATTTTTTTTTGAATGATGCGGTGAAACGGCTCCCTCTCAGTCAGTCAGTGAGGGGGGGGAGAGCCAGCCAGGCCTTGTGGCGGTGCCGGGCGCCGCGCTCCTGGGTTAGAGAGGCTAAGTGTCCGGCTTGCTCTGTGGGGTGGCTGGGCGGCAGGCAGGCAGGCAGCAGCGGCGGCGCCCCCCGTTCCTGTGGAGTGAAGCTTTGAGATGAGGCGGA
TRINITY_DN43589_c0_g1	AAGTACAAATTGCCAGAATGTCACAAAGTTTCCTGCGGCGTCCCGAAGGATATCGAACACGGACACTTTGACTACGTCACAACGCACGGGGTCACGTCGTATCTCTCTGTGATCAAATATACTTGTGACGCAAACTACCATAAAAGAGATTTCAGCAATGAAGGTGTTTATGTCTGTACGATCGAAGCGAAATGGAGAAACACTGAC
TRINITY_DN43579_c0_g1	CAACTATTTACAATCTATATTAATTTTGGACACAAAGAATGTACTGTAGCCAAATTTGCAAGGGGCACAAAAATAGTTGGAATAGTAAGTTGCAATGAGGAAATAAGAAATTTACAAATGCTCATGGCTAAGTTAGGTGAGTGGGGCCAAAATGTGGCAGACCGAGTGTGAAGTTATCCATCTTAGTCAGAAAAATAGAAAAGCAACTTATTATCTAAATGGACAGAAAAAGAGTGCTTCACTGCAGAGGGATCTGGGTATCCTCATGCATGAATTATAGAAAACTAGTATGTAGATACAACAGCTAATAAGGAAGCCACGTGGAATTTTGATATTCATTGCTAAAGGAGCAGAATATAAAATTAGGAAACTGTTGCTGTAACTTACAAGGCATTAGTG…
TRINITY_DN43560_c0_g1	ATGCAGACGCTGCGGCGGCGGATGAGTGGATATCGCTCGGCGGTCGCCGGGCGGGACTGTTCCCTTCCAGCTGGCGGGCGCTTCAGTGGTCACGGGCATTCGGCCTCTGACCTTCGGGTAAGATCCCACTGCTGACGTCCGACTGCTCACTGTTTTCTTTAGCATAGAATTTAATATTTTGATGACATACATATTCAGCAATGGAACTGGTGATAGGAAGGTTTAAATTCAATTCTGACCTTATTGTACATATTTAGAGGAAGTAAACCTTGTGTGATAATTGTAAACTGTTGCTTCTTAACACTGATCTGTATGAATGTTTAAACTCAGTTTGGCATCCCTGTGATCAAATTAGGTATCATGTAAGGTATGAATTCAAGAGTAATCTTAAATTCTTAC…
TRINITY_DN43565_c0_g1	ACACTGCCACTGTTCAACAATTCATGCTAACTCCTTGAGGAAACAGAAGTCACTTCTGTCCAAAAGGTGTAGCTGTAACTAGTGTTGTATTCATTCCATGCTGTAGGCGACAATTACCCATGTTCAGAAATGGTCTCATTGCTTTTGTAAAGTGTTTTGTAGCCAAAGCTAAAACTTACTGTAGTTCATTATTGACAACTAACCAGTTCACAAAAAAACAC
TRINITY_DN43565_c0_g3	CAGTTCACAAAAAAAAACACGAGTAATCTTCACAAATGTGAAATTGCACCGTACACTGAATACTTATGTATTTAACCTCTTATTGTGAAGGAAATTACTGCGAGGGTGACTAGGTGAAATGGCCGATTTTGATTTATTTTTCTGTTAATTTATTCATCTAATGATTTTGTATAAATCAACGCAATTCTTTTCCTTTTTACATTCAATTTGGTTATTTTAAGGGGTTCTTTTTAAAACTCAGCGCTGTATTCTGTAAATTTCGATCCTTTTTTTAAAATGTGTCTACAGAATTGTTTTACAAAGCTATGTTTGGAAATTATTTCATGACCATGTTTTTTCCAGAGGGTAAACTACCCAAAGAGGCTGAATGAAACATTTTGATAAACTGTACTATAATTC…
TRINITY_DN43565_c0_g4	TGCGTTACAAGGATCTGAGAACTACTTGATTTTTACCCTGATGGTCTATCAGTTTGCCTGAGTTTGATTTGAATGAAAGCATATTTTTCTGACTGTATACAGAAAGTTTTCTTTCTGCTACTGGAACAACAGCAATAATAAGTTTTCTTTTCAAGTAACTTAATAAAAATTGCATTGATATGAAAAGCCTTTACAGCCTTACTGAGGTGCCTTCCAAAAAAAAATTGCTTACCAAATTCCATTGATTCCCTATTTTATGTATAATGAATGATCATTGTTAAATGAAGTGGTCTAATATAAACTGTAGTTAGTGCTTTAGCTGGAACATGAATTCTCAGAGGGTGTATTTTCCACCTTCTGTCACAAAAAAAAAGCTGCTTTCACTATTTTGGTCTTCCA…
TRINITY_DN43581_c0_g1	AACAGGCGCCAGACTGTGGCGACTCGGGGAATTTCACAGTAACTTCATTGCAGTGTTAACGTCAGCCTTTCTTGTGACTAATAACTGAACTTTATTTGATGAGCACACAGCTCTGCTTTGGAGACCATCTAAGTGTGCGAGGTTCCATGCACTGTGGTTTAAGGTACTAAACAGATGCAAGGTCATTTCCTGTGCCACGAATTAGCACCTTTTGCTGGCGTGATTTCCTCTCTCTCTCTCTCTCTCTCTTGCAGTTTACTTTGTTTTAGTTAGGGTTGTGTTTTTATTGGAATGTAATATTTATTATTTGGTGATGGGGAAGATGCTGGGCGAGGTTTCCCGTGCAGCCTGCTGCATGTTTCGTAGGGGGTGGTCTGTCAGTGGCCGGCGGCGGGATCT…
TRINITY_DN43576_c0_g2	CCCCCCCTCTGTCGCAGTGGTTGTGTTCCCTCTCAGTGGTTTGCGTTCCCCCTCCCTTGTGGTGGTTTGTGTTGTCTGTTGTAATGCATTAAGTTCCTTCACTCACAGTATTAACTGTACACCTGGGGTGACTGATTTAATGGTTATCCGAGAGCAGGAGCTGTGTAGGATGTTTAACCCCAATTTTAATGAAAATTAGGAGTTTTGCCTTTTGTATGACTGATATTTGAGCATTTGACTGCCGCTCAAACACAGTTTCAGCTGTAAAGATCCCCTTTCTGAATATCATGGACTAGAACAAGAGAACTTTCCCGTATTTAGCTTGGTGAGATTTCTTCAACAGGAACTTCTTTGATGAAGTGCATTTTATTGTACATTGAGATTTCTGAAAGCAATGGT…
TRINITY_DN43520_c2_g1	GTTGGACTTTAACCTGGTGTTGTGAGACTTTGTACTGTGTCTATCCCAGTCCAACGCTGGCATCTCCATCTCATATTTGAACTGCTGCAGTCCATGTGTAGGTACACACAGCGCTGTCAGGGAGGGAGTTGCAGGAATCTGGCTCAGAGATGGCGAAGGAATGGTGACATAGTTCCAAGTCAGGATGGTGTGTGAGGGGAATATGCTGGTGGTGTCATTCCCATGTGTCCTCGGGGACATTACATCAGTCTTGTTCTGATGAGAAAGGAAGACAGGCTGGAGAATGATGTCCGGGAAACTCCCTTCTCTCCCAGAAAATCTTTAACATTCACCTGAAGGATTGGACGCGGCCTTGGATTAATGTTGAGTGTGAGGTGAGAATTCGACCGTGCAGCATTC…
TRINITY_DN43521_c0_g1	CAAGTAGGTGTGATGCTTCCCAAGCTAAACCCAGACCTTCAGAAGCAGAGACTGTGAGGAGTGAATGGGATGAAGTAAACTGCATCCAAGCTGGATTTTACAGTGTACCAAATGTACATATGGAGTCTAAAGGAACCAGTGACTTTGGCAGGAACTGCAAAGGGGACACTGGTATAGACAGTTAACAAAACCCCACCCTTAAATCATGCAGCGCTGCAGAAAGTGTACCAATGGAAAATGTACAGCCTGTTTGTGTTGATGCCAACCGAGCTACACTAAACTGTCTGAACTTTCTGCAAGTGAAATCCAATGGTGTTTTAAAATTGCAAGCAGTATCAGAGGAGATGGTGGACAGTGTAGTGCCTGTGTGTCCTAATACTGAAGCAGAGCCTGAGATGG…
TRINITY_DN43552_c0_g1	CCATAGACACTCCCCTCACTGACACTGACCCATAGACACTCCCCTCACTGACACTGACCCATAGACACTCCCATCACTGACACTGACCCATAGACACTCCCAGTCACTGACACTGACCCACAGACACTCCCCTTACTGACACTGACCCAGTCACTGACTCTGACCCATAGACACTTCCGTAGACACTCCCCTCATTGATACTGACCCATAGACACTCCCCTCACTGACACTGGTCCATAGACACTCCCCTCACTGACACTGACCCATTGACACTCCCCTCACTGACTCTGACCCATAGACACTCCCGTCACTGAGACTGACCCATAGACACTCCCGTCACTGAGACTGACCCATAGACACTCCCGTCACTGACACTGACCCATAGACACTCCCCTCACT…
TRINITY_DN43562_c0_g1	AGCCATTGTATTTATGCCACTATTGGATATTACTGGAGATGGCGGGTGGAGGCTGTGCTTTAAGGTGGTGGGAAAGCCTGCTGTACAGTAATAGCAATTTTTACAATATTTTAGACTTCTAAGGGCCATTAGAGCACTATGGAGCTTCAGAGCCTTGCCAGCTTTAAGAAACTAGAAGCTCAACAGTTTTGGCTGCAGATTGCAACTAATGTGAGAGGTGGGAGGGGGATGGTCAGTAATTGGCGATGAGCAATCTGGAGCCGAGCTAAATTTGGTAAATACAGCAAAGGCA
TRINITY_DN39643_c0_g1	TGAGCAGTGGCTCGGGGGGCGTTGGACGGTTTGGACCATTGTCTGGCTCTGAGTGGCTCCGGAGCTGATCCGCAGCTCCCGGTCGCTCATACTGGCCCGGTCTTGTGGTGAATGTTCTGTGCTTTCAGATACAGGGTCTTTAACTCTGTCTTCTTGTAATCATTTTTGCGGTCTCTGGCCTTCTCTGCTGATGCACTGGCATTGTGGCAGTGTCACTGGATGAGTAATCTGAAGGCCCAGGCTAATGTTCTGAGGACATGGGTTCAAATTATACCCCAATTTACTTAACTGAACAGTGACTCGGGAAACATTAGACAGTTTAAACCATTGTCTAACTCTGAATAACTCCAGAACTGATCCACAACTCCCAATCACTCATACTGACCCAATCTTGTGAAC…
TRINITY_DN39682_c0_g1	GCCGCCTTTCAGAAATTCCCTGTCCAATTTGTAATCCACCTCGCTCTGCTGCTGTGAGGCCTTGGACGCCTGCAGAAAGTCAGGTCGGTCTGCAGTCCACTTCCACTTGGCTTTGGTGGCCTCGTACTTCTTCTTGTAATCAAGATTGGTCGTGTTCTTGTACGCACTCTTTGCAGCCCTGATTGAAAAGGCATCACCAGCAATGTTGCAATTAGCTTTGTTCCGCTCATAGTTCTCCCTGTATTTCAAAGCACTAATTTTGTCCTTCACACTTTGCATGTGCAGAAGCAGCGGTGTGTCATGGATAGAAGTGTAGCCTTTGGATTTATCACGGTTATGCTCCAGTTTATATTTTATATCACTGATGAGCTTCGTCACTTTCTTGGTTCGGATGTTATC…
TRINITY_DN39608_c0_g1	GGGAGTGCCGCACTGTCAGAGGGTCAGTGCTGAGGGAGCGCCGCAGTGTCAGAGGGTCAGTACTGAGGGAGTGCCGCACTGTCAGAGGGGCCACCTTCCAGATGAGACATTAAGCTGAGGGTTTGTCTTTTCTCTGATATCCATGTTCAGTGAGGGAGCAGTTAATTCTTTCCCAGGGTCCAGGTCAATATTCACCTGACATCAGTGACATATATTGACTGGACAAGATTACATTACTGTTTATATGCTGATTGATTGCCCCGTTTTATCAATTCGAACACTAATCAGTGCTGGCCCTCTAGCTCTGCATAGTTACATTTACAATGACAGTCGCTGCTGATGATTCGGGAACAGCTCCAGTCATGCTCAGAGCTGGAGTTTCTGTGTCTCCAATTGCTG…
TRINITY_DN39679_c1_g1	CAGCAGTAAAATACTGTCCAAATTTTCTGTGCACACACTCAGGAAGGACCCAAACTTCCGGAAAAATCTGCCAGGCTTCCTGAAAGGCACACATACTGCGCTGATTAATGAAAGGGAAGAGATCCAGAGAACAATTGAAACGCTTGCCGCGTCATTGGAAGCAAGTGACAATGGTATACTTCAGATGTATACTTTATCAAAACACATTGCTCCCAAACACTTGAGGAGTCTGCAGGTGTCCTTTGAAGGTCAGCGATCTCGCAAATCCATCATACTGGAATGGTTAGGAATAACATCTGCATTCAGATGTTATTTCCCATCTGAATCGATGACAGCAGACAATGGCGCAAAAGATGACCTGGAGGAAACGGGTTCAGATGACACGGAGGGAGACACAGG…
TRINITY_DN39662_c0_g1	TCCTCCTTCCCTCCGATTCCTCAAGCCTGAGCTTAGATTCTCGTCTAACCGTTGGCCTTCCAGTTTGTCAACTATGTAAAGTTGTTCTTTAAAAATAACCGGTGTACTTTTTTGTTCAGAATGTGGTTAATTTCAAATCCCGATGAGGAGGCCTTTATTTCTCCGGTTATTCCACTCCCACCTCCGGGCGCTCACTGCTCCATATCCTCATCTC
TRINITY_DN28371_c2_g1	GAAGCAGTTGAGACTAACCCATTGAATGTTTTTAAGGCAAGGATAGATAGATAATTTTTGAACAGTGAAGGAATTAAGGCTATGGTGAGCAGGTTGGTAAGTGCAGCTGAGTCCACGGAAAAATCAGCCATGATCTTATTGAATGACGGAGTAGGTTTGAAGGGCCAGATGGCCTCCTCCTGCTCTTAGTTCTTATGTCATCTAAACAAAACAAAACTGTGTCCCACTCAAATTTTCCAGATGATACAGATTTGCAATGAAAGCAGCCTGGAGGAATACAAATAATGTCCCAATAACCATAAAGCCTATCAAGATAATTAATTGATCAAATTGGTTCAAAAATGCTTCCTTTGCATATCTTTTCTCACCAATGTTTTAAATGGAATTCCAAGTATTCAA…
TRINITY_DN28378_c1_g1	GCCTCTTTCCCGTGCTGTGTTGTTCTTTGTTCTTTATTTAAATCATGGAAATATTATTTCTAATTATCTCATGGGTGTAACAGTCTCCAGTTCCCTGAGGGACTATCCTACACAAGGCCTTGTTGTGCAGTTAATGAACCTCAAGTGAGTTGGCTTACCTCATGTTGAACCGGCGTCAGGCGCTGACTGGGAGGCAGGAGACAGTGGCACAGTGGTATTGTCACTGGACTCATAATCCAGAGACCCAGGGTAACGTTCAAATCCCACCAAGGCAAATGGCAAAATTTGAATCCAGTAAAATTTATAATTAAAAGTCTACTGATGACCACAAAACCATTGTCGTAAAAACCCATCTGGTTCACTAATGTCCCTTTAAAGCTGTCCGTACTTGGGCTGGC
TRINITY_DN28344_c0_g1	GGTTGTGGTTGGCGCAGACTTGATGGGCCAAATGGTCTCCTTCTGCATTGTAGGGATTCTATGATTCTAGGGGAGAAAGGGCCAAGGCAGGGTGTCAAAAAATGAGCTCAGGAGCTCGTAAGACATTGGGCAGCTATGTCTTCCACCTAGGAGAAAGGAGCTCATGAAACCAGTCCTCAATGGAGAACACTTGTATCAATCAGGTAGCAGTGCTGATTCCAAGAATATTATAGAACATACGTCAGATGGGAGTAGTTGACGGATTTTTTAAAATGTTTATATCCAATCCAATCAAAGTCTCAGCAAGTGAGATTTCCAGAGTCAAACTGATAAGACAGGCATCCCACCTCCAATCTTGGGCTTGATCTATGTAATCCATGTTGCTTGGAATAGGCATTG…
TRINITY_DN28359_c0_g1	ACTGCCCTCCAAGGGCAAGTAGGGATGGGCAATAAATGCTGGCCAGCCAGTGATGCCCATATCCCATGAATGAATAAAAAGAAAATCTGTTGTGCAGTTCCATCTTGTTCATTTTGAGCATCCATTTTCTCCAATCAATGTGTGTTGTGCATGACTATAGAGAGGTATAGCAGCTTGGAAAGATTGAAGAGAGACTTGGAGGTGTTGGATGGATGAGTGAGCTGGTCAATTCCTCACCTTCAGGGACCCACAGCTGAGCCATTACTCAAAGAAAAACCCACATTTTACCAACATTTGATTGTCCCTGGAGAAACATGATTGCCTGTTTTTTGGAAGCCTAATTGGAATTCTTCCTCATGCAAATTTTGCAGTGTTTAACCCTTTCCAGGACGGGCTACA…
TRINITY_DN28300_c3_g1	GAGTTTGCGTCTTTATATGCCCTGTTTGTGAACAGAACTCCCACTCACCTGACGAAGGGGCAAGGCTCCAACAGCTAGTGGCTTTTGCTAGCAAATAAACCTGTTAGACTTTTGTCGTGAGACTTCTTACTCTCCTACAGTGGGGGGGTCCAGGACTGGTTGTTGGTGACCTGGACACCAAGGTGAATGGAGGGGCAGGCTCAAAGGGGCAAATGGTTTCGCGTTTCTTTGTTTCTATAATTTAATGACCAAATCTGCAACCTACCAAGGCGGTAGAGCCGAATGCTGGGTGTTTTTTTGTACACGTAGTGGATCATTTACTGGTTAACTCAAC
TRINITY_DN22035_c0_g1	TCCGAGTCACTCACCATCCCGACTTGGGAATATATCGGTAAGTTCCCCCTCCGAGCCACTCACCATCCCGACTGGGAAATATATCGGCCGTTCCTTCACTGTAGCTGGGGTCAAAATCCTGTAACTCCCTCGCCAAAAGCACATTTTCCCCCCACTACCCGCAGGAGCGAGACCCACATTCTCCCTCACTCCCCGCAGGAGCGAGACCCACATTCTCCCTCACTCCCCCATGGAAGCGAGTCCCACATTATTCCCCCACTCCTCCGCGGGAGCGGGTCCCACATTCTCCCCCACAGGAGCGAGTCCCACATTTTCCCCCTCTCCCTGTGGGAGCGACTGGGGGAATACGGAGACCGGGACTGTGCGCAGTAACTCCGAGTGTGGGGATGCAGAGATTGG…
TRINITY_DN22035_c0_g3	CCCGCTTCCAGGAGTATGTGAGAGAGCGAGGGTACATCTTCTACACTGTCCCGAAATATGGCCAGGTTTGAATCCTGATTACCCTTAATCCCTGCTTCACCCTCCCCACTCCCCTGGGAGCCGGTCCCACATTCTCCCCCAGTGTGGGAGACCGGGACTGTGCGCAGTAACTCCGAGTGTGGAGGATAGGGAGACAGGGACTGTGCGCGGTAACTCCGAGTGTGAGGGATACGGAGACCGGGACTGTGCACAGTAACTCCGAGTGTGGGGGATAGGGAGACCGGGACTGTGCGCAGTAACTCCGAGTGTGAGGGATACGGAGACCGGGACTGTGCGCAGTAACTCCGAGTGTGGGGGATACGGAGACCGGGACTGTGCGCAGTA
TRINITY_DN22094_c0_g1	CGGGAAACAGCCAATCGGTAAGCTCTTTACTGCAGGGTGCAGTGTTGCTGCCATGACAACCCATCAGACAAGCTCCCTCGTCAAACAACCTGGGCCGACTTCTGGAGACTCTGGAAAAGGCGCCTGGGTGCGTAGGGGCACATCATTTGGCTTGCTCATGCAAGTGGGGCGAGGGACGGGGATGGTGGAACAAAAATTAAAGAAAATATATACTTTAAAAATAACTTCTCTTTCAAAAATAGTTCCTGGTCAAGGGTGCAGTGTGCATCTTACATATTTTCAACGCTCATTTGCTCGTTGCTGATGGCCACTCGTTTGGGGAGCCAAAGGGTGGCCATTTTCTTACCACAGTTCAAGCAACGATTGTCCAGCTCAGTCAGGTCAACTGTTTGGCCTTCG…
TRINITY_DN22031_c0_g1	GCGTGGGTTTCCTCCGGGTGCTCCAGTTTCCTCCCAGAGTCCAAAGATGTGTGGGTTAGGTGGATTGGCCATGCTAAATGTTTCCTTAGTGTCTCCAGATGTGTAGGTTGGGGGGGGATTAGTGGGGTAAGTATGTGGAGTTATGGGGATAAGGCATGGATAAGATGTTCTGTCAGACAGTTGGGTACAGACCTGATGGGCCAAATAGCTTCCATCTGCATTTCAGGGATTCTATCATTCAATGATATCTGGATCTCCATTTGAGTCACTTTGGCTTTGTGCATAGGACCACAAGAGCAGAATTAGGCCATTCAGTGAGATCAAGACCAATCTGATGTGATAGTATCAGTATCCATTGATCATTATCAATTCTCCTGCCTTACCCCCTTGATTCCCTTA…
TRINITY_DN22031_c1_g2	GCAGAAAATGGTTTGGCACAGACAAGAAGGGCCAAAAGGCCTGTTTCTGAGTTGTAATTTTCTATGGTTTCTATGGTTTTAGCATGCTCCACGTCAAGGGTTTTTTTTTGTCTTTTCATGGAAGCCTTCTCAACAGCCAGGATATCTCAAGTACGGATAAAATGGCTTACTCCAGCTATTTTATGTACAATCACCAATCTTTGAGTGACCTCAATGCAAAGTCATCGCCAAACCTAAAACAAGTAAACTTTCATGACCTGACCATTTAATACAGAGACGAGGAGGATTTTTTTCTCTCGGAGGGTGGTGAATTTGTGGAATTCTTTACCGCACAGGGCTGTAGAGGCTGGATCATTAAGTATGTTCAAGGTTGAGACAGATTTTGAGCCAGCCAGGGAA…
TRINITY_DN22031_c2_g3	CCCTTACTGATTAAAAATCTGTCTATTGCAGCCTTGAACGTACTTAGCCTCCACAAACCTCTCAACTAAAAAATTCCACAGATTCACTAAATTCTGAGAAGAAATTCCCCCCTCTCTGTTTTAAATGGGAAACCTCCTTACTCTGAGATAATACCCTCTGGTTCTAAACTTCCCCCCAGAAGGATACAACCTCGCAGCATTGATTCGTCAAGTCCTCTGAGAATCATATATGTCTCAATAAAGTAGCCTCTCACTCTTTTAAACTCCAATGAGTACAAGCCCAACCTACTCAAACTCTTTTGCTGATCAGAATTTTGAAAACAGAATATGCTAGCAGCACTCAGGAAGAAGCAGCTGTGCGGAGAATAGAACTTTATTGATATGATTTATGTTAAAATA…
TRINITY_DN22041_c1_g1	TGGGAATCAAACCCAGGACCCTGGAGCTGTGAAGTAGCAGTGCTAACCACTGTGCTACCGTGCCACCTACTAGAACACACTCTACAAATTGTCGAGAGTCCCACTTCTCGATGGTTGTCTAAAAGCATCATCAACCACAGTGACCTGAGTAATATTACCGGGAAAACCCTCAACCGCTTGAGGATGGGCCTGGGTTGATAGAGTTGTAGAGGTTCACAGTACAGAGAAAGGCCTTTCGGTCCATGTGTCTGCACTGATCAAAGACAAACCACCCGACTAGTCCATTCTCATTTTCCAGCACTTGGCCCATAGCTTTGTATACCTTGGTATCAAAACCGCATATCTAAATGCTTCTTAAATGTCATGAGGGTTTCTACCTCCCCTGCTCTTTTTCAGGCA…
TRINITY_DN22086_c0_g1	CAGGCCCAAATCCATGTGTCCGCACAGCAACAGAGATAATCTCTGAGCTGTCATGTTGCCCTCGAGATGGTCCAGTTTAAGCACACCAACGACATGAAGCAGTAGGCAACTCCCGAAGCTACCCAGTTACAGTTACCCAGCTCCTTGCCTGCATAGTCAGTTGCTGTCCTGACCCTTTGCCTGCGCTTCCTGTTGCTTGCCTACCTGACCCTTTGCTTGCGCATCCTGTTGCTTGCCCAGCTCTTCATCTGCATGGTCAGTTGTTCACCCAGCTCCTCGCCCACAGGGTCAGTTGTTCAGCCAGCCCTTCATCTGTGTGGCCTGTTGCTTGCCCAGCCCTTTGTCTGCCTGGCCTGTTGCTAACCCAGCCCTTTGTCCTCTCATGTGGTCAGTTATTCG…
TRINITY_DN22086_c0_g2	CAGGCCCAAATCCATGTGTCCGCACAGCAACAGAGATAGTCTCTGAGTTGTCATGTTGCCCTCGAGATGGTCCAGTTTAAGCACACCAATGACATGAAGCAGTAGGCAACTCCCGAAGCAATATCCAAGAGCAGCCCACCACAACCTGCCGCGCGCATGCCTCTTGCTGGACTTGAATGCCTGTGGAGACAAGAATTCATTGTTGAAGGGACTCTACGTCCTTGAGGCTGAAGCTGAATCCCGGGCCTGCGGTGTTTGGTGGGGCCTGCTGTGTCCCCCTGTGTGTGGACCGCTCGTGTGGCTGTCCGGGTGACTCTTGGGCGGCCCTGGCGTGCCTGCTTCCGCCGCCTTGCTCGGCTGCATGCCCCTTGCTGTACAGCACTGGATTATTTGCTAAAA…
TRINITY_DN22086_c2_g1	CCGTGATAAAGCTTTGCTTTGTTCTGCTCCTGACTGGATCCAGTGAGAATATGTGGGTTGCCAGGAAGTTGTAATAGAGCGAAGTCAATGGCATTGAAGTCAACTGCTGCAGAATTCTTCGTCTGTTTCACCTGCTAAGAAGTTGGTCTCTTACTCCAGTTCTAAAGAAATACTGGTTAGGGGATGTGAAAGAAGGTTTTTATTTAAAAGTCTGAGAACTTAATTTTCTCAGGATTGGAGCTTTCCTAAAATAAGGACATAAGAACTACGAGTGGCCATTTCCAGCCTGCTCTGCCATTCAAGAAGATCGTGATATGAAGATGCCGACATTGGACTAGAGTGAGTACAGTAAGAAGTCTCTCAACACCCCGTTAAAGTCCAACAGGATTATTTGGAATC…
TRINITY_DN22074_c0_g1	CATATCTCTTTTTTTTCCAAATCAGGAGACCAAAACTGTACACATTATTCCAGATGTGGTCTCACCAAGGCCCTGTATAGCTGCACCAAAACTTTCCCACTGTCACATTCCATTTCTTTTGCATTAAACACCAACACTCCATTTACCTCCCTAATTGCTTACTGTGCTTGCATACTAACTTATTGTGATTCATGTCCTAGGACATCCAGATCCCTCTGCACCACCGAATTCTGCAATCTCTCTCCATTTAAATAGTGTATTGCTTATCTATTCTTCTTGCCAAAGTGAACAACTTCACATTCCTCCACATTATACTCTGTTTGCCAGGTTTTTGCCCACTCACTCAACCTATCTATATCCATCTGCAAACTCTGTCTTCTTGAAAATATACTTTTCTCC…
TRINITY_DN22081_c0_g1	GTAATTTCACTGTGGTGTTAATGTAAGTCTTACTTGTGACACTAATAAATAAACTTTAAACCTTTCACAACTTCAAGATGCCCCAAAGTGCTTTGAAACCAGTGAACTGCCTTTGAGCATCTGTATTGTAGGATTTCAGGGCAAGTTAGAGAAGCATGAGAGAGAAAGGAATCGAGGGTTATGTTAAGAGCTTAATGCATGAAGGTGGGAGGAGGCTCAGTATGCTTTGTCTGTATAGTGTGCAATAAGCAATACTTTTCACTGTATAAGCAATATGTATCCAAAGATATGCAGGTTTGGTTGATTGGCCATGCTAAATTGACACTAATGCCAGGGGATTAGCAGGGTAAATATGTGGGGTTATGGGAATAGGGCCTGGGTGGATTGTGATCGGTGCAG…
TRINITY_DN22081_c2_g1	GCCAAGCTTTACTATGAGAAAAAGAAGAAAACTATAGTAAGTAATGATTATGTTGTTATACCTGTCAGCTTATTGTAATTATCCAATTTGAGTCTGATGTACCCTCCCTGAAAGAATGCTGCTGCCTTCTGCAGTTGCCTTGATCATAAGGCACATGAGTACTGTCAGCATTGCACGATATATCTCCCTGCTGGTCATGCTCTCTCAGCCTACCTGAACTGAAATTGGGGATTCTGCGCTAGTATCCAGCATAGTTCATGGAACTTGAGTTGCTGTAAATGTGGTAAGTCCTGTTTTGGGCTGATACTGTTTTCCATCTCCCAAAGACTATCACGGGGTCACAAAATCCCTGCAGTACAGAAAGAAGCCATTTGGCCCATCAAATCTCCCACAGAACAT…
TRINITY_DN22081_c5_g1	CTCTGGAGTTTGCACATTCTCCCTGTGTCTGCGTGGGTATCCTCCGGGTGCTCCGGTTTCTTCACACAGTCCAAAGATGTGCACGTTACGTTGATTGGCCATGCTAAATTGACCCTAGTTTCAAGGTTTGGCAAGGTAAATGTGTGGGGTTACAGGAATAGGGCCTGGGTGGAATTGTGGCCGGTACAGACTCAATGGGCCAAATGGCTTCTTTCTGTACTGCAGAGAATCTATGGAAACTTGCAAATCTCAGATTTGTGAAATTGTTTAGTTTCCACGTCCTGCTTGTCTTATTCATGTTTCTGCCCCTTGGTGAGGTTGTGTGTATGATTGTGTTGACTGAAGAGAGTTGGGAGTTACACTGACATTCTTTGCACTATTCTGCCACTCTTTGTTGGT…
TRINITY_DN22081_c6_g1	CCACACAGACTGTGACCCGAGCCGGGAATTGAACCCGGGTCCCTGGCGCTGTGAGGCAGCAGTGCTAAACCACTGTGCCGCCGTGCCATGGGATGTTAGCACTGACAGAAATGAAGCACCTTCTGTTGTAAAAGCCCCAGTTGTCAGCGCTGGGCGTTCAGGGGTCAGTTTTCACACAGCGGTTTTGAGCTTCCTTTACTGAGGTCCCAGACAATGTGCTTCACTACCAACTCCAAAGAAGTCTTCCCTTAACATCCAGTGCGTTCCGTATCACACCGACTCTCCCAAATAATAAGCCAAATTTGTCCTGTGGTGGCCCAGATAAATTTCCCTTCAGAGCACCGGTTGGTGCTGCTACCTCACCATGCTACTGAGACTAGGGTTCAGTTCCGGTTTTGG…
TRINITY_DN22087_c0_g1	CCGTATTATAGAATTATAGAATCCCTACAGTGCAGATGGAGGCCATTTGGCCCATTGATCCTGCGCCAACAACAATCCCACTCAGGCCCCCATTACCCTATGTATTAACCTTGCTAAACCCCCTAACATTAAGGGACAATTTAACATGGCCAATCCACCTCACATCTTGCACATGACTGTGGGAGGAAACCAGATGAGCCGGAAGAAACATGAGCAGGCACAGGGATAATGTGCAAACTCTACACAGTCACCA
TRINITY_DN22001_c4_g1	CAGCTTTCAGAGTGCTCCATAAGCTCCTGATACCAAATAAACCTGTTGGACTTTAACCTGCTGTTGTGACTCTACTTACTGTGCCTACTTCAGTCCAACACGGCAATTCCACATTTTTTTTGAGAACAGTTGCCTTGGTTGCATTTTATCAGTTTCTCCAATGAACAAAGAACAAAAAATTACAGCATAGGAACAACCTATGGCCCTCCAAGCCTGCACTGACCATGCTGCCCGTCTGAACTAAAACCCCCAACTCATATGGGAC
TRINITY_DN22000_c2_g1	TGTGAGCGCTGGCTGTTACCGGTGAACACGGGCCTGTTATTCGTGGCTGACTGCAAAAATGTTTTTCTTCATGGTAGTGGTGACGTAACCAGACTGATGCAAAAATAAAACTCCCTTTGAAAACGAGAAGTGCCGCCTTAATGAAGAAGCAAGAATTTTTCCACCTTCCCCTTGTAAAGCTGGGAGCAGGACTTTGATGACCTTTAGTGGTTTCTTTAAATCCAGGCCAGCATATGTTAACAGCAAATAAAATCTCTACTTTTTCAGAAGACTAAGGAAATTTGGCATGTCAGCTACAGCCCTCACCAACTTTTAGAGACACACCGTAGAAATCATTCCTTCTGGTCGTATCACAGCTTAGTATGGCTCTTGTTCTGCCCAAGGCCTCAAGGAACTACA…
TRINITY_DN22000_c5_g1	ATTAAGGAAATTTGGCATGACAGCTGTGATTTTTACAGATGCACCATAGAAAGCATTCTTTCTGATTGTGTCACCACTTGGTATGGCTCGTGCTCTGCCAAAGACAGCAAGGAACAACAAAAGATCATGAATGTAGCTTAATCCATCACGCAAACCAGTCTCCGATCCACTGACTCTATCTACACTTCCCGCTGCCTCGGCACCTCGGACATTCTCTCTTCCACCTTCTTCCATCGGGAAAAAGATACAAAAGTCTGAGATCATGTACCAAC
TRINITY_DN22009_c0_g1	TCTGCAGGTTATAACTTCTGATTATGACAAACTACAGATATTATCATTGCTGTTAGTTCAATCACAGAGCAAAGAACATTACATTCCTATAACAATTCAATTGCCACATTAAAATGTCACTTATTTTCTACATTGGCATGGTCAGAGGTTATTGCCAGAGGAATTATTACAGTAATTACATTGGTAAATATATTAACTCCCAAGTTTTGATCTGTGTTCTGGTTGTTCAGTAGTTGTTATAGTATCTGGAGTGCAAACTTGATAGTTGTCCAAAAACATTCAGCAACAACTTGCATTGATCACACTTCACAGGGGAGAAATGAGTAAAAATAATTGAAACCAATCTGAAGGACACATTAGGAGAGGTTATGAAACAGGTTGGTTTTAAGGAGTGCCTTA…
TRINITY_DN22090_c1_g1	TGCGCAGACAGTGACCCAAGCTGGGAATCGAACGCGGGTCCCTGGCGCCGTGAGGCAGCAGCGCTAACCCACCGTGCTGCCGGGAATGGGAACAGGACGGAGGGATGTAGAACATAGAAAAACTATAGCACAAACAGACCCTTCGAACCACAAGTTGCGCTGATCCTATCCCTCCCTACTAGACCTACCTATAACCCTCAATCTTATTAAGTCCCGTGTACTCTTACAGAAGTCTTTAAAAGACCAGATCAAATTTACCTCCACCGCCACTGACGGCAGCCGATTCCACTCACTCGCCACCCTCTGAGTGAAAAACTTACCCCTGACATCTCCTCTGTACTTGCTCCCCAGCACCTTAAACCTGTGTC
TRINITY_DN22071_c1_g2	GGCCAGACCAGGTAAAGACAGCAGATTTCCTTCCCTAAAGAACACTAGTGACCCAGATGGGTTTTTCCAATAATCGATTCATGATCAATTCTTGATTCCAGATATTTTTATTGAATTCAAATTCCAGTTGCTGTGGTGGGCTTCAAACCCAGGTCCCCAGAACATCAGCTGAGTTTCTGGCTTAATAGTCTAGGGATAATACCACTAGGCCTTCATTTCCCTCTAATATTGTGCACAATATTGTGCACAATATTCCAGAGGTGGTCTTACTTGTGCCCTGTAGAACGAAAGCATAATATCTCTACTTTGTAATTGATTTCCCTTGCGAGAAATGATAACATTCTATTAACCTTCCTAATTATGGACGAAAAGGGATTGGTTTAGGCTAGTGGGTCATTG…
TRINITY_DN22071_c3_g1	CTGCCCTCTGAAATGGCCTAACAATTTGAGGACAACTAGGGATGGGCAATAAACGCTGGCCAGCCAATGATCTCCATGTCCCATGAATGAATAGAAGTCTCACACCAGTTTGGTAGACTCTTAACTGCCCCCTTGTGGAGCCCTGCAAGTTGCTTCACATCAGAACACACCACCACCACCTCTTGGGTCATCTAGGAATGGAGAATAAATGCTGACCACGTCAGCGATGCTCACTTCCCTCGTGTGAATAAAAATGCAATGTGGGCACCTGGGCATTGTTCATGAGTCGACCGTGGAAATGCTCCGAAATGAAGAGTCAATCACTCTCCAATGGGGAAGAAATTGGGAAGGAAAAGACCAAACTGCTTCAGACTTAGGTAGGCACTTTGAAATAACCAT…
TRINITY_DN22033_c0_g1	TCCAGGAAGCTGCACAGCGTTTCACTGCGAATGCTGGAATCTGAAACAAAAACAGAAAATGCTGGAAAAACTCAGCAATCTGGCAGCATCTATGAAGAGCAAAACAAAATTAATGTTATGAGTTAGTGTCACTTTTCATCTGAGGTTTTTGAAGTGTAGTCACTGTTGTAATGTAGAAAATGTGACAGTCTATGCACAGGAAGCTCTCACAAACAGCAATATGAAAATATCCAAATAATGGCCTGAATCTTCAGAGGAGCCGTAATCATCATTAGATTTCTATTACGCTCCTATTTTGCTGCAGCACAATTCTGTACCACATTTCTGGCCTGGTCTACTTATCCCGGCTTCTTATGGAATGCAGAATGGTCTTCCATTGAATGCTTCCTCTTAATGCTG…
TRINITY_DN22072_c0_g1	GGGGATTGGCGGGGTAAATACGTGGGGATAGGGTGGAATTGTTGTCAGTGCAGGCTGGACGGGCCGAATGGCCCTCCTTCTGCACTGTAGTGATTCTATGGTTCAAATCCTGCCTGAGCAAACTGGTCATTCAGCCAACCTGGCGTCGTCAGGGCAGCCATTTTGAAACGGGCCTTCCAAGCGGCTGAGGGAACCCACCAGACAATTTCGTAAAGCAACTTCACTAAAAAATAAAATAAAGTCAGGAACTGGATTTCTCACATTTTCCTTAAAAATTGAAACCTTGCAGCTGGAGCAAAGAATTAAAAATGAGGCCCCCCCACTGGAAACACCTGGCTCCGGATTGAGGCGGGGGTCGAGGCGACGGG
TRINITY_DN22063_c3_g2	AAATCCTTCTGGTAGTGTGGCGACCAGAATTGAACAGTATAGTATAGGTTTTTAAGTTTATTTGTTAGTGTCACAATTAGGTTTACATTAAACATAGAGGATAGGAGCAGGAGGCCATTTGAGCCTGCTGTGCCATTCATTATGATCATGGCTGATCGTCCAACTCAATAGTCTCATCCTCCTTTCTCCCCATAAACTCTGATCCCATTCGCCCCAATGGGAGATCTAGCCGTCTCTTGAATACATTCAATGTTTCGGAATTTAACACTGCAGTGAAGTTGCTGTGAAGGTCCCCTAGTCGCCGCACTCCGGCGCCTGTTCGGGTAAC
TRINITY_DN22037_c0_g1	AAGTAGTTCACCTCCTGACTCCCCTAAAGCCTGTCCACCATCTACAAGGCGTAAGTAAGGAGTGTGATGGAATATTGACCACATGCCTGAATGAGTGCAGCTCCAACAATACTTAAGAAACTTGATATCATCCAAGACGAGGCAGCCTGAATGTTTGCTATTCCTGCCACGAACATTCAATCCCTCCATCAGTGATGCACAATGGCAGCCGTATGTACCATCAACAAGTTTCAGGGCAGGAACTGACCGAGGTTCCATAGGCAGCACCTTCCAGACATACGACCAGAAAGATAAAAGCAGCAGATACCTGGGAACACCATCACCTCAATTTCTCCAGGTCACTCACCA
TRINITY_DN22018_c0_g1	TTTACACATTCTCCCTGTGTCTGTTTGGGTTTCCTCCGGATGCTCCAGTTTCCTCTCACACTCCAAAGATATCCAGTTTAAATAGATTGGCCATGCTGAATTGCCCCTTAGTGTCTAAAGATGTGCAGGTTAGGTGGATTGGCTGTGGTAAATTGCCTCTTAGTGTCCCAGGATGTGCAGGTTACGTGGATTGATCATGCTAAATTACACCCCTTAGTGTCCAAAAATGTGCAGGTTAGGGGGATTGGCTGTGCTAAATTGCCCCCTTAGTGTCCAAAGATGTGCAGGTTAGGGGGATTGGC
TRINITY_DN23103_c0_g1	CTATATCACTTTTATCACTTCACTAGGTGCAGCACTGGTTTTCCCTCAATGATGAATAAAAAAAGGAACTGATATAGCTGGTATTGTCACAGGAGCAACATAAACTTGCAACAAATCAGCCAGAGACAAGTAAAACTTGGGTGTTAAGTGTGGAGAAGATTGTACTGCACTTTACTGTCCAGCTCTCAGTGGCTATAGGGCCTTAGAGAACATTAGGGAGCAGAGATTAAAATTGGGAGGTGGTCAATTTTATCTGTGTTTCAATTAAAGAGGGAAAGGATAATATAATATAAAATTATAAATTCAGTTTGATTATGAAAAATGAGTAACTATGTTAGAGGGAAAACACAGCTCAATTGACACAGTATTTAAGAAAATCAGATCCATGTGTATTCTTTA…
TRINITY_DN23158_c0_g1	AGGCCCTTCACCTGCTCCGTCTGCGGGAAGGGGTTCATTCAGTCGGGGCACCTGCTGAAGCACCAGCGAGTTCACAAGTGACTCCAGGGGTCGGTTTCCACGAACCTTGCTGGCGTTGAGCCGTCTTGTTTCATGTCCCTTGCTAAATTTCGTTTCATTGGGTGGAGGTGTCACTGTGAAGAATGCGCGAGACAGTAAGGAATTTCAGCAAGGATTATTCAGCAGTCTTTAGTTACGTAAGAGACTTACGTGGCGGAAAACCGCAGCGTGCGACGGTGCAGAGGGACCTGGGGGTCCTTGTGCATGAGTTGCAAAAACCCAGCCTGCAGGATGGAAGGAAGG
TRINITY_DN23126_c0_g1	GAAGCAGTCCTGTTGCTGTGGTCAAAGCAGTGATTTATAAAAGTTGAGCATGACTCCCGTGCCTTTGTAATCCAGGTCCCTTTTTATAAAGTCAAGTATCCTTCAGGTGGTACGAGAGGAGGCGATGATGTAGCGGTATTGTCACTGGACTGGCAATCCAGAATCTGAGGGGACTCTGGGTTCAAATCCCGGGTACACATCTACCATAGT
TRINITY_DN23126_c0_g2	ATCAGAAGACATTTAAACTGTGAGGGTGGTGGAGAGGGGAGCTGTAAGTGGACAAAGGGAATGTAAATGAGGAGAAAAATGCCACCTTCTCTAAAATCTCCACACACCTGAAATCTTTTATTCTTGGCACGATCCACCTTTCCTGCACCTTCATCAACCCCTTGGCATCTTCTGACAATATAGTGCCAACAACTGGAAGCAGTCCT
TRINITY_DN23117_c2_g1	GGATGACGTGCTGAGGAACTGTCTCAAGCTTAAGGCAGCGCTGGAAGGTCACACTGGGGAAAGGCCACCATTCAACCAGGACAGACCGAGGGACCAGTGACTGTAAAAAAAAAACCTCGCCGACTGCGTTAACTGTGTGCAGTTTCTGCAAAACAAGAAGTCTGACAACACCAGGTTTAAGTCCAACCAATTTATTTGATAGTAAACTCACGAGTTTCGGTGTTTTGCAACTCTGCAAAAACTGCATACAGTGCAATGTGAGGAATGTACAGAGCTTGACGCAGAACTTTGAACTGTAATGAATGTAAAGTCTTGGAACTGAACACCGTAAAATTTTGAAGTTAAGTAAGTGGTAAATAGGACTGTTTTTCAC
TRINITY_DN23194_c0_g1	TTTAGGGAAGGAAATCTGCTGTCCTTGCCTGGCCTACATGTGACTCCAGAGCCACAGCAATGTGGTTGACTCTCAACTACTTCCTATGGTCAACTAAGGATGGGCATTAAACACTGGACAGCCAGTGACGCCCAGGCCCCACAGATGAATAAAAAATAAGTAACAATGGTGAAAATTCACATGTAACTTCCGTCTGCTAAATGTTCTCCGTGGTTAGGTGGGTTGGCCATGCTAAATTGTCCCTTAGTGTCAGGGGGATTGCACGAGGTTATGGGGATAGGGCTTGGGTGGGATTGAGGTTGATGCAGATTCAATGGGTGGATTGGTCTC
TRINITY_DN23116_c0_g1	CTCCAATCTTCCGGAACCTCTCCCGTCTCCATTGACGATGCAAAGATCATCGCCAGGGGCTCTGCAATCTCTTCCCTCGCCTCCCACAGTATCCTGGGGTACATCCCATCTGGTCCAGGCGACTTATCTACCTTGATAGAATTCAAAAGTTCCAACACATCCTCCTCCTTAATATTCACGTATTCAATCTTTTCCATCTGCTGCAAATCCGTGGCAAAATCTCCCAGATCAGCTTCCACCGTGAATACTGAATAACAAAATCTCCCGGATCAGCTTCCACTGTGAATACTGAGGCGAAGTACTCGAGCAAAGTACTCATTGGGCAAAGTACTCATTAAGCACCTCTGCCATTTCTTCTGGTTCCACACAAACCTTTCCCCCCTCACCTTTTATAGGTCC…
TRINITY_DN23116_c3_g1	GTCATTTATGAAAATGACAAACAGCAAGGGTCCCAGAACAGATCCCTGGGGCACTCCAATTGCAGTTATCCTCTTCCTGCTTGGAGGAGGATAGCTGAGCTTGTGCCAGTTATCTGTCCCGTTCCTTCAATTGCACTCACTTTATAAGAACAAGACTTTGGCAATTAATATGTCTCTTGCTGATTTCACAGAAAGAGTATAGAGCAGCACGGTGGCATAGTGGTTAACACTCCAACCTCTCAGCGCCAGGGATCCGGGTACGACTCCTGGCCTGGGTCACTGTCTGTGCACAATCTGCACATTCTCCCCGTGTCTGCGTGGGTTTTCTGCAGGTGCTCTGGTTTCCTCCCACAGTCCGAAAG
TRINITY_DN23197_c0_g2	GAGACCTACCTCTCCGCTCTTCAGGTGGGGGGGCGGCGCTCTGAGGGCTTGTGACTCCAAATGAACATGTTGGACTTTAACCTGGTGTTGTGAAACTTCTGACTGTGCCCACCCCAATCCAACGCCAACACCTCCACCTCATTGCTACCTTCAGACAGTGTCATCAAAGATGATCTCTTAAGCTTTCTTTTCACTTTTTGAATGGGTCTAATATATCTTTATAACTTGCTGTTCCGATGTTGAACAGGACTTTTTAACACCTCACCTATTGAATGAGGATTCGTACCGAGAACCCATGAGTTGTTTTATCCCTTGACTTTAAAATCATAGTACAAATCATAATCTACTCCAGTGACGTAAATAATGTCCGTGAACACTATCTTGGACAGAGGGAAGAAG…
TRINITY_DN23141_c0_g1	GTTGGCATAATGGTTAGCACTGCTGCCTCACAGCACCACAGACCGGAGTTTGGTTCCAGCCTTGGGTGACTGTGTGTTGCATTGTCCTTGTGTCTGTGCGGGTTTCCCCTGGGTGCTCCGGTTTCCTCCCACAGTCCAAGGATGTGCAGGTTAGGTTGATTGGCCATGATAAAATTGCCCCTTGGTGTCCTCAGATGCTTAGGTTAGAGGGATTAGCGGGTAAAATGTGTGGGGATATGGGGGTAGGACCTGGGTGAGATTGTGGT
TRINITY_DN74732_c0_g1	ATTTATCTTCATATTTTTATTTCTGATGTTGATTTAGAATCATGACTTTTTTTTCATTTTTCTATTTTCTTCTCTTAAAATGACCTTTTTAATTCCTTGGAATCTATGGGTTGTTTTCACAAATTGATTAATAATGAAATATTGTCTGAAATCTTGGCTCAGTCGTAAATATAAAAAACTATATTCTTCAAGTTGTTTAATAGTACAGAACTTGAGTTTTGCTGAAAACCACTTTGACATGTCTGCTTTTACTGCGGTACTGTATTCTTAATGATCTTATCAGTGGAAGGAGAGACCTTTAGGTAGTGATTGAGGATTCTGTATTAAGTTCACCTATACTTTCTGGCAAAGGTCTTGTGGCACAGTGGATCCCTACCTCTGAACCAGAAGCTCTGGATT…
TRINITY_DN74726_c0_g1	CCTACATCTGACATCCGTCCTATAATTACCACCCCTCAATTTAAAGCTATGTCCCCTGGTGTTAGTTTACGAATAGAGTATATTGCTTCTTTTACTCTGGGCCGCAGACTGGTGACAGTTTCCCCCGGTGACCAGACGTGAATCCGTTCTATTGCGCTGGAGAGGCGGCCATTTCCAATCTGACACCAATCTCAGATCTGTATGATTTCATCCCGTGTGCCATTATAAAAGCTCTGATAAGGTTTTGATATATACAGAAGTGCATTTTTATGAAAGTACGCTTATTCAGTTATAAATATATAATGAATTTTGAAACCTGTGCAATGCAGGGTTGATGAAGATTTCTATATATGGTGTTGAATGTTTACAGCAGCAAGGCTGACTTACTGTTTTTAAAAA…
TRINITY_DN74767_c0_g1	GTCATAGCAGAGTTGACATAGTTGTTTAACTCTGTATTTTCATCTCTGGAACGGAGTCTGAATACGGCCCAGTCCAACAGGATGAAAGCTTCTTCTGTCTGCTGGATGTAAGGGTGTGAAGTAAGTTAGAGTATTCTCAGCAGAGTTCTTAGTGAGGCCTTAGTGAGGAAGTAAGGAAATAGCATCTAATCTGGCATTAACTGGGACTAAATTGGCAGGTTCACTTAGACA
TRINITY_DN74789_c0_g1	AAATCAGATTGAGTAAATGAGTTTTGTTTTGCTATGAACCCAACTAAGGTTCTGTAGATCTGTTGTTGAGCGAAGAAAGTTAAAATATAACACATCATGTGTGGGCTCATTTAACGACTGAAAGTGCCAAAAGAACATGTGTAATTCAAATGGGAGCAATATGGCTACATCAACCTTTGTCCGATTACACCTTTTGACATTTTTCTACATTACCAGTACAATATAAATGCAAGCTGTTAGTGTTAAGTGTAACAAGCAGGAGAAAAGTCATAGAAGGTGACATGGGGCTCCTGGGAAAGTAAAGGAAAAATATTTAGTCTGGCAACTCTGGTTTATCGGTCGGTACTGGATTCTTAGCGAACAAACTCTGGAGAGGTTTTTTTTAATGTATTAACAGAG…
TRINITY_DN40540_c0_g2	ATCCGAATAGCACCCATTGACCCCCACTCTCTGCCTCCTATTTGACAACCAATCCCCTATCCACGCTAACACCCTATGTGCAGCTCCCTCCATGATTTCTTTGTTTTCCCATTTAACAACAAACTAATGATTGGAATGTCCTGGAGATGGTCCTTATTTAGTAACATGCGATATTTCTGTTTTTTAAGCCTTATTTCTGAACAGTAATATTACAACTAGTTAACTTCAACATCTTGTTATTATTCTTGTCTGCTGCCTACACTTTCTGTAGGTGGCAGATAACTACTGAGCGATGTAGACCAAGTACAGAGAACCTGTAACTGTTGTTGGAACAACTGAAAATCTTCGTCTCAATTTCTCCAATCTCTTCCAAAGAAAACAAATCGATTTGAAGGAAAC…
TRINITY_DN40595_c0_g1	TGTTCTTCTCGGCCAGGAACTCTTAGAATAACTATTGTGATAAGTAATTTTTGCTAAGACTCATGATGCATAGCTCTGGTAAATGTGGCCTAGAATGAGAGATTTTTGCTCATTTACCCGCTAATTGACCCATTTGAATCTTGTGAGATGTGATTTGTGACCTGATTTATACTGTTTCCTCTTCACTTCTGAATTATCTATTCTCTCTAACATTGGAAAGATCATGTAGCAGGGAATTCAATCTGGGATCTTTGGCTTGTTCAAAGTGGGGTATAATTTATTACTTAAATGTTTGACTC
TRINITY_DN40574_c1_g1	GAAAAATTAAGTTTAAAGTGAGAACTCTCAATGTATTAAAGTTTATTACAACTAAATGATCAATTAAAAAGATGGCAAATTGGTGCAGGTGGTGAAGCCACGTGGGATTAGAGGTGAGCTAGTAAGGTGGATAAAGAACTGGCTCGGTCATAGAAAACAGAGGGTAGCAGTGGAAGAGCACATTTTTGAATGGAGGACTATGACAA
TRINITY_DN40504_c0_g3	GCAAGTGTGGCATTAGTTCTGAGTTTGAGTTTCACCAACCTATCGTCCCTTTGTACTGCTTTAATGCTCCGTTACTATTTCATTCATTGGTTTCAGCTATGGAATATTTAATTGGTTTGCAGTGTTGGTCATTTGAATTGTTTCCTGGCTAGTGTTTGATACCCATATAGATGTCCCCAGTAATCTAGAGTAGATGGCCTCTAACCGAATGTTCCTGTATGTTACACTCAACATATTGTATGAAATGGAGGCTGGGGGGAGGTCTGACCATCAGGGAAGGTTGTGTACACCTTGAGTGATAGATCTTGAAGGGTTATAATGGTGTCTTGTTCACTTGTGGTATAAACTGCGGTATCCAGGTCTCCTCGCTTGAATGTTCTCCTGAGATTTCAGTGAAGC…
TRINITY_DN40522_c1_g2	CCATGATCTTATTGAATGACGGGGCAGGCTCGAGGGACTGGATGGCCTACTCCTGTTCCTATTTCTTATGTTCTTATACCAGTCAGTGGCTACAGAGCTTGGTTACAGATAACAACGACAAAAGCATCAACCCACAATGACACCCGATAACCACTTTACTTGTGGCAGAATGCCTGTCATAGATTGGCCATCAGTAAAAGTGAATCATATGAAGATACCCCAAGCTCAACAGATTTGTTGCATATACATCGTCATATGTAGATTGAAGGATGTCAGTGATGAGAAATGACAAATGTGTTTGAAACTCATGGGGGTTATTTCCCCATTCCGCCCACCATGGGAACCGTAGCGGGTGGGGAGAAGAACATGTAAAGGCCTGTTGACATCAGGTGGGATTTT…
TRINITY_DN40522_c2_g1	TGACACGATTGGTTTGCCGGACTCACCTATATGAAGGAGAAGATCAGTAGAACGGAGCTAAGCAAATGTTTCTGGGCACTCATTTCTCCTTCTTCAGAGGCAAGCCTGGTATTAGCCCATGGAAGGGTCTCGCTGCGTGTGAATTGTCCCGTGTGGAAGGCACCATTGTGGACTGCATGGGAGTGGACAGTTTATTTGTACCTTCCGCGCGTTGTAACATTCCACAGTGTGGCTCCCTCTTTCCCTCCCTGTTTTTCCTGGAGATTATTTGTGCACAATGGTTTTGACCTTTTATCTTCTGAAAGGCCTCCAACGGGCTGGGCACAGACTCCCATCCTCAATCAAACTGGCCACTCGACACGAGAGCAATGTGTCTTCATCAAATGGGCTGCTTCACAT…
TRINITY_DN99563_c0_g1	GAAGTTCCTCCTCAACTCTGTTCTAAACCGCCCCCCCTTTATCTTGAGGCTGGCAGATTTCCTCCCCAGGTGGGTTTTTACAACAACAGACAATAGTTTTATAGTCTGTCGACTGTTAATTCCCATTTTTTAATTAGATTCTTCTTTCACTATCTGCCTGGGTGGGATTCAAACCCAGGCTTTCTGAAGCATTATGAGTCCAGTGACAATACTGCCTCTCCTGTGTCAATATTTCTTAACTGTCTCTGGTAATTGACCCCTCTGCCTGGGGCCAGTGGACATTCTTGGCTGTCTAGGTCCCTCGTAATTTTGGACACCTCTGTTAGGTCACCCCTTAGCCTCCAAGGAAAACAACATGCCTATTTAATCTCTCCTGAATTTTCAAGCCATGGCAACATT…
TRINITY_DN97228_c0_g1	CAATCGCATTACACATGCAAAGCAGGCGAGTGGAGTGTACGCCGGCAGCTCACATCAGTAAGACGTGCAGCCATTCAACAGTGTACTGTAATGGAGAAGGCAATCGGCTCCCACCTAATGGATCTCAAATATTAAAGCGACAAAAAGCCTCAGCGCAGAATCTAGTTAAAGAGCAGCATCGAGATCATCTGAGGAGAGTAACCTTGTCAGCCATGTTGGATGCAAGGCTTATGGCAAACACAGTAGGATACGTTAACCAGACAGCAATTTTCTCACGGCCTTTTTTTTTCTAAGTAATCAGTAATCAGCTCTCGAACAATTTTTTTTTCCACAGCTGCCATTAATGAAGACAAGGCGAATCTGCATACTGCCATTCTTCATTGTGCTAACTTGGCAATG…
TRINITY_DN97277_c0_g1	GGCGGGAGCTGCGCCGCCAGCGGGTTTGGTTGCTTCTCGGACTGGCGGCGCTGACTCTCCGCCGCCGCCGCAGCAGCAGCGGTTTGGTTACGGTGCACCCACTGAGAGGCAGAGACCGTGACCGGAGAGGCTGCAGCCGGCCGGGACCGACAGCGAGTTCCATGTCGAGAGTGCGGAACCGACTCGGCCCTGAATCAGAAGGGGAAAAACTCACTCCCTCCCAATAGCCGGGCTTTGGAGGACAGGACGCGGGACGGTCATTTCAAACTTAGGCCGGAGGAACATGATCGGGCGATGGGGAAAAAAGCTCCGCGACCATGAGACGACGCCATCCGCCCGCCCTCATCTCCCGCTCCCTCCCCATCTCTGATTGCCTCCCAGCTCCATGTCCTTACCGGG…
TRINITY_DN97234_c0_g1	AGTGCAGTTGTCCCGATTTTCTCCATTCCGGATTAATCAACAGTCACCAACAGACAGAAGAATCACAGAATTAAAAGTTGGCAAATTTTCTCTCTTTTAACATAGCAAGCCAAGGAAAGCCCAAAACAATTTCAAAATATACTCTGGTCTTGGAAAATATAATTAAACCTTTCATTTGGTAATTTCATATAGAGTGTGCAATCACATCATATAGATTTAATTCTTTTAGAAAGATTTAATGGCAGTTGTTAAAATATTTATATCCTGTTACAGAGTGCTTCTCAGTACAATTACTTGTTGGGGAAAGTGCTGCCCAGGAATACGCTTCTTTTAACACTTTTAAAAATATCAAAGTGAAACATTTGACTTTTTCCTTATAATTTAGTTTCCTCCGCTAGA…
TRINITY_DN33144_c3_g1	GTGACATTTACTTCGAGGAAATCAAAAGGTATTCCCATTAATGAGTCACATTGAGAATTTACATTTGACTGACGTAAATGGGATGTGTTTGGAAGTTGCTACAAACAGAAGGGGAATATGAGCAGACTCATGTAATACAAATTATGGTTCAGCTGTGCTTTGTCAGTAGTTCCATTTGCAAACAAAAGCTAGCGTTTATTTCCATTTACTTTAGCCACGGTATTTGTTCCGCTGCCCGTTTTGAACACCCTATTTACCGAGCGCACTGAGGATTAGTACTCCACTTCTTATGCAAGATAAGCTATTAAATTCTGGTGAAAGTCCATTCTGTAAAGTCAACAATTATGTTACGTTTCAATTGTTGAAAAGTGGGTGGATTAAAGGCTTGCAAATACAGAC…
TRINITY_DN33195_c0_g1	TAATCTTCCACAGCTGAGCCCTAAACCTAGCTGATACAAATCCACTTTACTGATGGTGTCAGCTTGTCTGAATCGCCAGTGCAAGCACTCTCGCCTCTGAGCCAGAGAGTCATGGTCTCAAGCCCGATTTTAGAGAGCTGAGCACGTAATCCAGGTGGACACAGTAATGCATGACTGAGCGAGTGCTGCACTGCTGGGAGCCCTATCATTTGGAAGAGACGTTAAACCAAGGCCTTAGCCGTCCTTCCTGGTCAATGCATG
TRINITY_DN33184_c1_g1	GACCATGCTAAATTCTCCCTCAGTGTACCCAAACTTGCGCTGGAGTGTGGCGACGTGGGGATTCTCACAGTAACTTCATTTCAGTATTACTACAAGCCTACTTGTGACAATAATAATAAATATTAATGAGCTTCTATCATCTTGCTGCCCCCTCCCTCTTTATCTCCTGCCTCAGCTAATGTTTGCTGTAGTCTCCAATAAACAGACTGTAGGCCTGGACCAGGAACTGAACCTTGAATCTTATTGTCGGTATGGTTTTTTTGCTACACTGGGTAGAGCCTTTGCTTATTGGATCACTGCGGGTCAGTCCATGTTCTGGGTCCCCATCTGAGCAAAACATCTCCCCAGATAAATTAGAGGAACAATTTCCTGTTGACTGAGGTGTGATAGATTGCTGAA…
TRINITY_DN33173_c0_g1	ATCAGTGTCACAAGTAGGCTTATGTTAACACCGCAATGAAGTTATTGTGAAAATCCCCTAGTCGCCATACCCCATCACCTGTGCGGGTACACGGAGGGAGAATTTAGCATGGCCATTGCATCTGACCAGAACATCTTTCTGACTGGGAGGAAATGTGAGCACCCGGAGGAAACCCATGCAGACACGGGGAGAAAGTGCAGACTCCGCGCAGTCAGTAATC
TRINITY_DN33152_c3_g3	TTATGAATACTTTTTTTTTTGCAAAATGACTAAATGAGACCTTCAAGCTCTTTGTCATTCCAGCATGGGAATTACTGAGCAGTACTATGTTATGAGCGCAAACCAGCGAAAATCTGTTGATTGTTCTGTTTTACAGTTACGTTAACTTTCTCCAACTAACATGTTGATGGGTCCTTGAAGCTACCACACAGAAGGTTTGAAAGTTTGTGTCAGGAGTGCGTTGGGAACGTTGTGACTTGGTTATTCATGAAGGTTTCAGCAGAAATTAAGCTGAACTAGGGTCAGAGACATTGTTAGAGGTGGAAGGATTTTTTCAAACTTGCTCTTTTTTCCATTTTGAGATCATTTTTGTTGTTTAAATTTACAGATTTTGAGTTATGTCTTTGATGGAAAGAATAT…
TRINITY_DN33129_c0_g1	CAGTCTCAAGATAAAGGGGGGACAGTTTAGATCAGAGTTGAGGAGGAATTTCTTCACTCAAAGGGTGGTGAATCTCTGGAATTCTCTGCCTGTTGAAGTGGTGGAGGCTACCTCGCTACATATATTTAAGTCCACGGGTAGGTAGGTTTTTGACAGACAAGGGAATTAAGGGTTATGGGGGGAAAGTGGAACTGAGACACGACAGATCAGC
TRINITY_DN33106_c1_g1	TTTTAAACACAGAGAGTGGTGACTGTCTGGAACAAACTGCCAGAGGTAGTGGTAGAGGCGGGTACAATTTTGTCTTTAAAAAGCATTTAGACAGTTAATGGGTAAGATGGATATACAGGGATATGGGCCAAATGCAGGCGATTGCAATAGCTTTGCAGTTAAAAAAAAGGGCGGCATGGACGAGTCGGGCCAAAAGGCCTGTTTCTATGCTGTAAACTGCTGAGACTCTATCAGAATGCATGGAGTTAAAAGGGGCTGGAAGATTTGCCAAGCTTGGGGCTAGAATGAACTGCATACCCTAAAGGTGAAAGGTAGTTTTGGGAGTAGAGGTTACTCGGTTGAGAAAGGAAAATGAAGCAATCCCTTTGGAAACTAGGAACAACTGTAAACTGCTTGTTA…
TRINITY_DN33194_c1_g1	TATGGCTGATAATTCTACTCAATAGCCCAATCCCACCTTCTCCTCCCCCTCCCCCCCCCATATCCTTTGATCCCCTTCACCTCGAGTGCCATATCTGACTGCTTCTTGAAAATGTACAGTGTTTTGGTATCAACCACCTTCTGTTGTAGAAAATTCTACAGGCTGACCACTCTCTGGGTGAAGAAATTTCTCCTCATCTCAGTCCTGTCTCCTCAGTCTGTAACCCTTGGTTCTGGATACCCCCACCGTCAAGAACATCCTTCTTGCATCTACCCTGTCTACTCCTGTTAAAATTTTATGGATTTCGATGAGGTCCCTCCTCATTCTTCTGAATTCCAGAGGATACAATCCTAACCAACTTAATCTGTCCTCAAATGTCAGTCCTGTCATCCCAGCTGT…
TRINITY_DN33194_c1_g2	ATCCCCATATCCCTACACATTTTACCAGCTAATCCCTCTAACCTACACATCCCAGGACACTAAGGGGCAATTTTACATCTAATTTCCTCCTGAAACCACATGTTTTGGCCTCGACTACTTTCTGTGGGAGTGAATTCCACACATTCACCACCCTCTGGGTGAAGAAATTTCTCCTCATCTCAGTTCTAAAAGAACTTATCCTCAAACTATGACCCCCTAGCTCTGGACTCCCCCCATCATCGGGAACATTCTTTCTGAATCTACCCTGTCGAACACTGTTAGAATTTT
TRINITY_DN33194_c5_g1	GGGAAATGTTAGGGATGTAAAAATTTTAAGCAGGAAAAGGGAGGAAGAAAGGAAAGTAAACAAAACAAAAGGTGTTATGGTGATAGGTGAGAGATTGAATGAAAATGAAATGGTAGTGCAAGAAAAAAGGGCAAGGTGCTGATGCAGCAAAGCAATGCTGTAAATAACAGCACAGCCATTTCCAAACAATTACATAGACGATATAACAGCGAAACAGAACATTTGCACCAACTGTTCACACAATATCTACCTGGTGATCATTCCATGCCATGTATCTGATCTCAGCCATTTGACTTGCTTTTGATCCCATTTCTCTTGTACTCTCTGGAAACGCAAGCTATTTGTCTCAGGTTCCATGTAGCAACTATTCTGAGTGAAGAAATGTCTCCTCATTTACCT…
TRINITY_DN42822_c0_g1	AGTTAATATTCAGGTGCAGCAGGTAATAAGGAAAAAAGAATTTTGGCATTCGTTGCTAATAGAATAGAGTATAAAAGTAGGGAGATGTTTTTGCAAATGTATACGGCATTGGTGACACTGTATCAGGAGTACTGTGCACAGTTTTGATCTTGAGGAAGAATGTAAATGTTCAGAAAACATCACCAGATTGATTCCTGGAATGAGAGAATTGTCTTACAAAGAGAGATTGAGCAGTTCAGGCCTTTACTTGCCGGAGTTTAGAAGGATGAAAGGAGATTTAATTAAGATACATAAGATGTTGAAGCGGATCGACAGAGTACATACAGAGCGGATGTTTCCCCTTGTTGGACATTCTAGAATTGGAGGCATTAGTTTTAAGCTAAGGGGTGGCAGATGGAA…
TRINITY_DN60_c1_g1	CGGTTGGGCTGCCGCGTGACCGGCGGAGGACCAATAGCAGGCGCCGTTTTAGTCAGGCCCGCGGAAAGTCAAAGGCCGTTTGGAAACGGTTTTTTTTCCTCCTCCTCTGATGTTCCGAAATTATTTCCCTTAAAAAATTAAAACCGCCGTTTTGTTCCCCTCATCCTCCTCAGTGTTACTCCTCCTCCTCTCCTCCTCCTCCTCGTGGCGGTGCCGGAGAGGAAGCGGTTGCTCTTCAACTCCCAATCCGTGGGACGTGCCTTTGACTTTGTTCTTATGATCGGTTTTATTTGTTCCGAAGGAGGTTGAACGGGAGAGGGTGAGGGGAGGGGGGGTGTGAGGGAAG
TRINITY_DN13_c0_g1	AAATGCTGGAAAATCTCAGCAGGTCTGGCAGCATCTGACAGTAAGGAGAGAAGAGAACTGACGTTTTGAGTCCAGATGACCCTTTGTCAAAGCTGACAGTTGCACTCTTTCCTATGTAGGTTCCTGAAGTGCGAAACTGTTATCACAGTGTCTTAGGGATATCCCTAAATCACTGTTATCACAGTGATTTAGGGATAAGTCGTTAAAAAAAATCCTCATTTCACAGCAGGAACAGTTGAGATTTATAAACGAAGTTTAACAAGCCTGCATGCCATGGTGATGTTGTAATCTTTATATTTCTGCAGCTTTATTGCTTAAAATAATCCTTTTGTGAAGTAAAATCAGAAATGCTACCTTGTGTGATTTAGTGCAAGCCTATATTGTAATTGTGGGTTAAAA…
TRINITY_DN13_c0_g4	GAAAGATGGAAGCAACACCATTGTTTTTACTTTGCATCACCTATTCCATTGGTGAATGAAATGTCATCATTTAACTTTTTCTAATCACTAACACATTTATCCTGTGTCTTTGTAAGATATGACAATCAACAATACAGACAGTTAAATGATTAATGGAACAAAAAAAGAAAACGCTAAAAAATCTCAACAGGTCTGGCAGCATCTGTAAGGAGAGAAAAGAGCTGATGTTTTAAGTCCAGATGATCCTTTGTCAAAGCTAACAGGTGTAGAAAGTGGGAGATATCGATACTGTAGGGTGAGGGAATGAAAGATGTGTCATAGCAATAAAAACAAGGGGAAAAGTTGTTATTGGCAGTCCATAGAGGCAATAGGAGGTGTGAATGGTCAAATGGCAGAGAA…
TRINITY_DN13_c1_g1	GTGCAGAGTTCCGGAGAGGGGGCAGATCCTGAAAGCTTGTGGTGTTTGCTGCCGGGTAGAAAATCATAGCAAATAAATCATTTGCTACCAGATAAACCTGTTGGACTTTGATTAAGGATTGGGTTCAGCAGATGTGATATGGAGATACCGGTGTTGGACTGGGGTAAACACAATAAGAAGTCTCACAACACCAGGTTGGCTCACCTGATGAGGGAGCGGCGTTCCGAGGGCTTGTGGCGTTTGCTACCAGGTGGGCGAGGGCTTGAGTTTCCTGTCAGGTGGAGCTGTTGGACTTGAACCTGGTGTTGTCAGACTTCGATCCACTGTGAGAGTCAGCAGTCGCGGATAGCAGGAGTGGGAAGTCCCACAGCATCAGGTTGACGGTCCAGCGGGTTTGTT…
TRINITY_DN13_c1_g2	CAGCTGGATATAGCAGTGGGAGTGAGTGGGATTAAAAGTTATGCAGAGAAAGCAGGATTAGGCTATTGAGTTGGATGATCAGCCATGATCGTGATGAATGGCGGAGCAGGCTAGAAGGGCCAAATGGCCTCCTCCTTCCCCTATCTTCTATGTCTATGGAACATTAGTTAAACCCCATTTGCAATACTGCATTCAGTTTTGGGAACTGCACCTCAGAAAAGATGTATGGCATTGGTTTTGCACAGATTCACCAGAATGTTACTGGGGCTTAAACTTTGAGGACAGGCTGCATAAATTGCGTTTGCATTCCCTTCTAAGTAGAAGGATGAAGGGTGGTCTGATCAAAGTCTTTCAAATGTTAAAAAGGATTTGCTAGCATAGATATAGAGAAGATATATC…
TRINITY_DN13_c2_g3	CTTTAATGCCTCCCTCTGTCCCAGTCTCATATGTAGAGATGCCAGCATTGGACTGGGGTAAACACAGAAAGAAGTCTCACACGTACATCACCAACTCCATAGCCTGGAATTCCAGAACTACAGTAAGAAGTCTCATAACACTAGGTTAAAGTCCAACCAGTCCAACGTGGGTATCTCCACATCATGATTCCAGAACTATCCAAGTGTTTTGCCCCATGTTCAATGCACTTTTTAAAAAAAAGCCACACTCTGCTTGACCAGCCCCGGCAGTTGTGATAAGAAGATTCACATTATTTTGACTGTGACCCAACAATTATTTTGGGTCAGTTGTTGACCAAACACTTTGGGTCAATTTCAGAAGAGCCATAAGAATAAGGGCCATTCGGCCCTCGAGCCTTC…
TRINITY_DN13_c2_g4	CTCAGAGGAAACCCACGCAGACACAGGGAGAACATGCAAACTCCACACAGACAGTGACCCAAGCCAGGAATCGAACGGGTCTCTGGCACTGTGAGACAGCAGTGCTAACCACACTGACTTGTTCTGGAGAGAAGAACAGTAAGTAGTCTCACAACACCAGGTTAAAGTCCAATAGATTTAGTTGGTAGCACAAACTTTCGGAGCACTT
TRINITY_DN13_c3_g2	CTGTACCCGAACAGGTGCCGGAGTGTGGCGACTAGGGAAATTTCACAGTAACTTCATTGCAGTGATAATGTAAGCCTACTTTTGACATTAGTAAATAAACAAGTAATCCTCAAAGCTTCTGTATCTTATTTCTGGACCATCTTTAGGACCTATCTGTTCGACCAGTTTTTCTTGTCACTTACCCTAATAGCTCTTCATGGGACTCAAAATCAAAATTTGCTTTATAATAGTTGTTATGAAACACCTTGGGATATTTTATTGCATTCAAAATGCTAGGGTGACTGCAAATTGCTGTCAAGCGTTAAAAAGAATGGATCCAAAGTGGGTGGATAGATTTAAAATCAACCATTTTGAATAATTGAACTGGAAGGAGTCTCACAGCACCAGATTAAAGTGCAA…
TRINITY_DN13_c3_g3	TGTGGAGTCTGCACGTTGTCCACGTGTCTGCGTGGGTTTCCTCCAGGTGCTCCGATTTCCTCCCACAGTCTGAAAGACGTGCTGGGTAGGTGCATTGGCCCTGCTGAACTCTCCCTCAGTGTACCCAAACAGGCACCGGAGTGTGGTGACTAGGGAATTTTCACAGTAACTTCATTGCAGTGTTAATGTAAGCCTACTCGTGACACTAATAAAATAAACTTTAAAC
TRINITY_DN13_c4_g2	GGAGACAATACACATCTCTTTAACCTGTGATCAGTGCTCCTTCCACTCACATTGTCAGCCACTTTAAGACTTGAACAGCAGGTTAGGTGTAAGGATTCGCATTCTAATCAGCAACTGTCTGTGCTTTATATGCTCTGTCTGTCTGAGGTCAGAACTCTCCATTCACCTGACGAAGAGGCAGCCCCCTTGAAAGCTTGTGAGAATATTATCAAATAAATCAGTTGGAC
TRINITY_DN13_c4_g3	CACAATCCGGTGTCATTCGGCCCCTGATCTTCAGGTAGGCGAAGTTCCGCACACATGAGGACGGCCTCAACCGGGATCTTGGGTTCATGTCACACTATCTGTAACCCTCACGATGCTCACGACTTGCCTGGGCAGCAGACACACCAGCGAGTTCACACAGGGGAGAGGCCATTCACCTGCACCGAGTGTGGGCAGGGATTCACTCAGTCATCCGATCTGCGGACACACCAACGAATTCACACTGGGGAGAAACCATTCAGCTGCACTGACTGTGGAAGGAACTTCAGACACTCAGGCAGTCTCACTGTACACCAGCGAGCTCACACTGGGGAGAAGCCATTCACATGTTCTCAGTGTGGGAAGGGTTTCAGAGTTTCATCCCGGCTGCTGAGACACCAG…
TRINITY_DN13_c4_g4	GTGCTTAACCCTCTCTCCACTCACATTGTCTGTACCTTTAAGGCTTGATTACCTGTAAAGACTCGCATTCCAACCATTATTTTACAAATCGAGTTTGTGTCTTTATATGCCCTGTTTGTGAACAGAACTCCCACTCACCTGATGAAGGGGCAGCACTCCGAACGTTAGTGGCTTCTGCTACCAAATAAACCTGTTGGACTTAACTTGGTATTGTAAGACTTCTTACTGAGGAAAAAGCACCAGGGGTTCAGGTTCAATTCCAGCCTTGGGTGATTGAGTTTGTTCTGAGTCTGCAAGAGTTTCCTCCCACAGTCCAAAAATGTGTGGGTTGGGTGGATTGGCCATACTAAATTGGCACTTAGTGTCAAGGGGATTGGTAGATTAAAT
TRINITY_DN13_c5_g2	CATTCACCTGCTCCGTCTGTGGGAAGGGATTCACTCATTCAACTAGCCTGCTGACACTCCAGCGAGTTCATACTGGGGAGAGGCCGTTCACCTGCCCTGTGTGTGGGAAGACATTCACTCGCTCATCTCACATTGTGACACACCAACTTGTTCACACTGATGAGAGACTGTTCAGATGTTCTGACTGTGAGAAGAGTTTTAAATGCGAAAAAGATCTGCTGACACACCAACGCATTCACACTGGGGAGAGACCGTTCGCCTGTTCTGAGTGTAGGAAGGGATTCACTCAGT
TRINITY_DN13_c6_g2	ACCAGCGAGTTCACACTGGGGAGCGACCATACGCCTGCTCAGAATGTGGGAAGGGATTCATTCAATCATCACAATTTAAGGCACACAAGCTAGTTCACTCAAGAAATCGTCTGATCTCACTGTACACGAGCGAGGTCATACGGGGGAGAGGCCATTCACCTGCTTTCACTGTGGGAAAGGATTCACTCAGTCATCCCATCTACTGTCACACCAGCGAATTCACACTGATGAGAGACCTTTTCAATGTCAAGACTGTGGGAAATGCTTTAAAAGCTCTGGGGAGCTGATGCGTCATCAACGAGTTCACAGTGATGAGAAACCGTTCAGATGTTGTCACTGTGGGATTGAATTCAGGCATTTATCTCAACTCACTGCACACCAGGGAATTCACACTGGGGA…
TRINITY_DN13_c7_g1	GGCTGTGTCTGGAGCTGCGAGGAGCCGGAGAGAAACAATGGAAGTGCTGGAAGTGGAGAATTGACAGACGGGAAACACAAATCAAACATCACATCGTGATCTGACTGAGTCACTCAACACAGTGTGATCTGACTGAGTCATTCAACACAACAGGACCTGAATGTCAGCAGAATCTGAATGTGGAATGTTACAGAGGAATGTTACAGATTTTGAACATGGAAGGAGAAAGTACACTTCACAGTGAATATTAGAAGGATATTGAAAGAGGAATCACAGGCTGAAATCTCAAACGTCAGGTCTAGATCTGGCAGATCAGGTCTAGATATGGCAGAGTCATGTTCCTTGGGATCTGAATATCATCAAGTCATATTCCTTGGGACCTGAATATCATCTCATATT…
TRINITY_DN13_c12_g1	GATTCACTCAGTCAGCAAACTCAGGGAAAGTGAGTTCACAAGTGACAAACACAACATCATCACACCCAGGAGAGACCCTTTAAATGTGGGCCTGGCTTCAAAAGCTCTCGGGAACTAATGTCCCACCAGTCAGTTCACACCAGGCAGAGGCTGGTCACCTGCTCTGACTGGGGAGGGATTCACTCAGTCGGCAAACTTGGTGAAACACCAGTGAGTTCACAAGTGGTTACAGTTCTGGGATTATTCTTGTCAATCTTTCTTGCCCCTTCTCCAGTGCCTCTATTTCCTTTTTCTAGATGGAGATCACTAATAGAATGTAGAACAGTACAGCACAGGAACAGACCCTTCAGCCCACAGGCGTAGAACAGTACAGCACAGACCCTTCAGCCCACAATGTTG…
TRINITY_DN13_c14_g1	CGAGGGGGCTGACCCCGAAAGCTTGTGAGTATGTTGTCAGGTGGATAGGTTGGACTTAAACCTGGTGTTGTCAGACTTTTTACAGTGTTTGAGGGGGACAGTGTAGAGGGAGCTTTACTCTGTATCTAACCCCGTGCTGTATCTAGCCCCATTGGTGTTGCGTGCAATGAGTTGGGTTCCTTTCCCTGTTGCTGACGTTCCGCATCCGATGAGGTTAATGAAAGTGGCTTCAGTGACATATACTCCGGCCAGTGAGTGGAAAGTATACCCCTAGCTGAGAAATGTCCCTTTGAAGCTGTGCTCCTTCCAACTGTTACATTGGCTGTTTTGTGCATTTGCGGGTAGCTTTGAGTTCTTGAGGCTGAGTATATTTAAAGCATGTTTTACAGAATAATCATA…
TRINITY_DN13_c22_g2	CTACTGGAACACCAGAGAATTCACGCTGAGGAGAGTCCATTTATTTGCTCAGAGTGTGGGAAGAGATTCACTCAGTCATCCCGACTGTTGCAACACCAGCGAGTCCACACTGATGAGAAACCTTTCAAATGTCCAAACTGTGGGAAGTGTTTTAAAAGTTCTGGGGAACTAACACGCCATCAGCATGTTCACTCTGATGAGAGACCATTC
TRINITY_DN13_c38_g1	TTTTGTGAAGGAACAGCACTCAAAGTGCACTGACCTGTTGAAGGGGCAGCACTCTGAAAGCTCATGATTCCAAGTAAACCTGTTGTACTTGTAACCTGGTGTTAGAAACCTAGAATAGAAAACAGTCAGTGAGCCTGCTGCAAACTAGCAACCAATGGAGGAAGGTCCTCATCTAATCTGAAGCTTCAAATGATTAACAGATTCTAGGATGGTTGTAGGTAAATGCAAATCACCTAAAGCAATATGGATTCAGAATTCAGTGGGAAGATAATATTCCTGAAATGTTTTGGAACCCTTCATTGTGTATTGAGAATCTTTGGAAGTTTCCATTAAATAGCAAGTAAAGGATATGAAAGATGAATCAAAACCAGAATCCTATACATTAAATAAGAAAAAATA…
TRINITY_DN13_c42_g1	GCGGGTGCGGGTGCGGGGTTTTGGAAGAGGAGGATTTGCAGTCAGGACTCTTAGATCCTGTTGTGATGGTTGTTCTGACGGAGCTGCCCATTAATGGTTATCATTCGGATTTTAAACGTTGAAGTAAGAAGCACAGCGGATGAAGCCGTCCCTCGTGTGGACAGGGCTTCAGCTGATCATCTGGCCACAGGAGCTACAAGTGTAAATTTGCTGAGGAGAAACCATGGAAGAGTGAGGAGGGATTCAGTTACCTGTCTGAACTAGAAACTCAACGCGTAGTCACACACAGGGAGAGGCCATTCACCTGCTCTGAGTGTGGG
TRINITY_DN13_c44_g1	GCCCATTAGTGTCCAAGGATGTGCATGTTAGGTGGATTGGCCATGCTAAATTGCTCCTTAGTGTCCAAAGATGTGCAGGTTAGGTGGATTGGCCATGCTAAATTGCTCCTTAGTGTCCAAAGATGTGTGGGTTAGGAGGATTGGCCATGCTAAATTGCCCCTTAGTGTCCAAAGATGTGTAGGTCAGGAGGATTAGTGGGATAAATATGTGGGCAGGAAGCCAAGCAATCAA
TRINITY_DN13_c44_g2	GTCCCTTGGTGTCCAAAGATGTGTAGGTTAGGGTGGATTGACCATGCTAAATTGTCCCTTAGTGTCCAAATATGTGCAGGTTAGGGTGGATTGGCCATGCTAAATTGTCCCTTAGTGTCCAAATATGTGCAGGTTAGGGGGATTGGCCGTGCTAAATTGCCCCTTAGTGTCCAAAGATGTGTAGGTCAGGAGGATTAGTGGGATAAATATGTGGGCAGGAAGCCAAGCAATCAA
TRINITY_DN13_c54_g1	AAAATATTTAGCGAGGCAGTCTCCACCACCTCAATGGGCAGAGAATCAATAGGAGCAGGAGTAGGCCATCTAGCCCTTCAAGCCTGCCCCGCCATTCAATAAGATCATGGCTGATCTGTCGCTGCTCAGTTCCACTTTCCCGCTTTCTCTCCATAACCCTTAATCCCCTCTTATCAAAAACCCATCAACCCGCATCTTAAAAATATTTAGCGAGGCAGCCTCCACCACTTCAACGGGCAGAGAGTTCCAGAGATTCACCACCCTTTGAGTGAAGAAGTTCCTCCTCAACTCTGATCTAAACTGCACCCCCCTTATCTTGAGGCTGTGCCCTCTAGTCCTGCTATCCTTTCTAAGCAGGAAGAATCTCTCAATCTCTACCCTATCCATCCCTTTCATTAT…
TRINITY_DN13_c54_g3	GAAAGCTAGTGGCTTTTGCAACAAGTGGATCTGTTGGACTTTGATCTGGTGTTGTGAGACTTCTTACTGCGCCTACCCCAATCCAATGCTGGCATCTCCACATAAGAACATAAGAACATAAGAAATAGGAGCAGGAGTAGGCCATCTAGCCCTTCAAGCCTGCCCCGCCATTCAATAAGATCATGGCTGATCTGAAGTGGCTCAGTTCCACTTTCCCGCCTTCTCCCCATAACCCTTAATCCCCTTGCCTACCAAAAACCTATCTACCCGCGTCTCAAATATATTT
TRINITY_DN13_c61_g1	CATCTTCTATCATACCAGAGGACTCATAGTGGGGAGAAACCATTCAAGTGTGAGTTGTGTGACAAGTCATTCACGCGATTATCAAGCCTCACTGAGCACCAACGCCTTCATACAGGGGAGAAACTCTTCAGGTGTGATGTTTGTGCGATGACTTTCACCCGAAATTCCCATCTTCTATCACACCAGAGGATTCACACAGGAGAGAAACCCTTCACGTGTGAGGTGTGTAACAAATCATTCGCGGTGTCATCGACTCTC
TRINITY_DN13_c63_g1	TTGGTAACGTTTGCTGCCGAGTAAACCTGTTGGACTTTTGGTGTTGAGCAGAAATTGATGGCCAGGTTCCGCATACGAGGACGGCCTCAATTGGCTGGAGACAATACACATCTCTGTGCTTAACCCACTCTCCACTCACATTGTCTGTACCATTAAGACTTGATTACCTGTAAAGATTTGTATTCCAACCAATATCTTGTAAATTGAGTTTGTGTCCATATATGCCCTGTTTGTGATCACAACTCTGACTCACCTGATGAAGGGGCAGTGCTCCGAAAACTTGTGGCTAGTGCTACCAAATAAACATGTTGGACTTTGACCTGGTGTTGTAAGACTTCTTACTGTGTTTACCCCAACACCGGCATCTCCACATTCCAATTATCAATAAACAGGACAGCT…
TRINITY_DN13_c131_g1	AGAATGTGACAACTAGAGGATTTTCACAGTAACTTTATTGCAGTGTTAATATAAGCCTACTTGTGACAATAATAAATAATAAAGAAATATTATCTGTCAAATCATGATTTCAATGTGGGACCAAATAAACTGGAACCTTCTGGAAAATAACATTTATAATAATTGTTAATAAGCCATATGGAAAGATTTACTTTGCCAATTTTAAGAATGGACAAAAATCTTAACTACTTTGCGGATGTATTTATGGATTATTCGAAATGAATTGTCTGTTATAATTCAAAATGGATTGGTTTTGTGTGTTAGCCCAGCCCATTCATTGCAATCCTCCTTCCCCCATTCTCCTGTAACCCCCTAAACTAGCCCCCCTTCCACAACCACCCTCCCCTGCCCGCCCCCTAT…
TRINITY_DN76_c0_g1	CTGCAGGGATTCTAAGAAACTTTCTAACCTTAAGAGAAAATGCTGGAAAATCTCAGCAGGTCTGGCAGCACCTGTTTGGAGAAAAAAGGACTGTCATTTCGAGTCCAGATGACACTTTGTGAAAGGGAAAAAGACATAGAAAGTGGAAGATATTTATTGAAGCTAAAAGGCATGGAAAATGGGAGATATTTAAATCTCAGCAGGTTATCTGCTGAGGGGGCGCCATGGTGGCTTAGTTAACACTGCTGCTTCACAGCACCAGGGACCTGGGTTCTGTTCCCAACTTGGGTCACTCTCTGTGTGGCATTTTGCACGTTCTCTCCGAGTCTGCGTGGGTTTCCTCTGGGTGCTCCGGTTTCCTTCCGCATTCTGAAAGACATGCTGGTCAGGTACATTGAC…
TRINITY_DN76_c0_g2	TCTGTATGTTTACACATTTGCCCCATGTCTGCTTGGGTTTCCTCCGGGTGCTCTGGTTTCCTCCCACAGCCCAAAGATGGGTAGGTTGATTGGCCATGCTGAATTAACCCTTAGTGTCAGGGGCATTAGCAGGGAAAATGGGAATACAGGAAAAGGGCCGCATGTCAGGTTGTGGGCGGTGTAGACTCGATGGGCTGGATGGCCTCCTTCTGCACTATAGGGATTTTATGATTTCCTTCCCTAAAGGACGTCAG
TRINITY_DN76_c2_g1	TCCTACCTCTGACATCCGTCCTATAATTACCACCTCTTAGGTTAGGTGCATTGGCCATACTAAATTCTCCCTCAATGTACCCGAACAGGCGTGTGACAACTAGTAACTTCACTGCAGTGTTAATATAAGCCTACTTGTGACACTATTAAATAAACTTTAGAAACAGTCACAGAGACTCTCACACAAACACAGATATAGTCACCAATAATGTCCTGTATTTTTCCAAAAGCAATTAATGTTAATTATTAGTCAGCCAGGCGAAGTGTGAGTTTACAGGGCTGACCTTTCTCCAGGCCTGACCAGAATCTGGAAACTCGTGCAGTTAATTATATCTCTTGTTTTGCTGTCTCTGAAAGAGCTGGAGATCTACTGAATAATAGATGCTTGTGCGACCAGCCG…
TRINITY_DN76_c3_g1	TCCTCATCCTCATCCTCATCCTCCTCCTCCTCCTCATCCTCATCCTCATCCTCATCCTCACCCCACACACCCTGACTCCATGGGAACAGTACCCCATGAAGATTTGGTGCCCACTGGAGAGGAGGATAATGGTTTGTGCCAGTGGTACCTTTTGACTGTGTTGGTTTCTAATGCACTCCACAGGGATGTTGAGGGTGATTTTTTTTTTGGCTTCTGTACCAGTTTCCAATCCAACCGGAATCCAGTGAGGAGGGAAATCTTTATTTAAAAATTTCTACCTCTTGTGAAATGAGTTGTTTTTTTTTATACACACACACATTACAAAGGGATAGGTTTGGTCTAAAGGTGGTTCCTTGTTAAAACCATTTCAGAAAGGGATTGGTACACTTGAATAAATAA…
TRINITY_DN76_c5_g1	CCTCTTTTTAATAAGAGAATGTTTACTTTGTATATTTTTGTTATATTTATTTTATTTGCTGCAACCTTTAGAAGGAGGGTAGCACAAATCGGAGTCTCAGTCTGGCGAATATATCAGTCCCAAAAGTATATGGGCAACAACGGCATGTTCTGCAGCACTTGGTAGCGTTATCTCTCTCCATTTTATGTTCACCTCAGTAATCTGTTCCCGATTCCCAAAAGTAAAGTTAGTCACGAGTAGGCTTACATTAACACTGCAATGAAGTTACTGTGAAAATGCCACAGTCACCACACTCCGGC
TRINITY_DN76_c6_g1	GTGGTGATTAGGATTTTCACAGTAACTTCACTGCTGTATTAATGTAAGCCTACTTGTGACACTCAAAGAAAAAAAACTTGATGGTGAATTCCATTATTTGAACATATCTTAACTGGAGTAAATGCCCACAGTCGGAAGTCTCACAACACCAGGTTAAGTCCAACAGGTTTATTTCGGTATCACAGGCTTGCTATGAGTGAGTTAGACAAGTTGTCTAACAGTGAGTTAGACAAAGCTCTGATATCACCTACCTATAGTGATACGGTACATGTTTCATCCTGGAAAAAATTCATGGGTGCAATCTTACCGGGCAGGGAATTTGACACCCAGCTAAATCACCGTTCACTGCAGTGGGACCAGAAAATCCTGCCCGAGTGAACAGCCGTAAGATTGCACCCT…
TRINITY_DN76_c7_g1	ACTATATTCTGCAGTAACACTATACAGTATGCTTTGTCTGTATAGCGTGCAAGAAACAATACTTTTCACTGTATGCTAATACATGTGACTATAATAAATCAAATCAAGTCAACTAGACAGACTCCTGATCAAGCAAAATCTCAATTTGAAAATCCTGATCCATGTTTTTGTATCGGCGTCCTTCTATTTCTGGCCTCTTGTGCTTTCTGGATTTGAATTGCTCCACTCAGGATGACCTTACCCTCAGCTACCATAGCCCACAGCTCTGAATTTCCCTCCCTAATTGGCACAGTAGTTAGCACTGCTGCCTCACAGCGCCAGGGACTGGATTCAGTTCCCACCTTGGGTCACTGTC
TRINITY_DN76_c11_g1	GTTACCCAAACAGGCAACTAAGGGATTTATACAGTCACTTCACTGCAGTGTTAATGTAAGCCTACTTATGACACTAATAAATCAATAAACCTTTCAACAAGATGTCCCCAACTCTATTTCATTCTCTGACCAATGAAACCAAGCGTGCCGAATGCTGCCTTCACCACTCTGTGCAGAATGTGCACATTCTCCCTGTGTCTGCGTGGGTTTCCTCCCATAGGACGAAAGATGTGCTGGTTAAGGTGCATTATTCATGCTAAATTCTCCCTCAATGTATCCGAACAGGCGGCAGAGTGCACAGGAACTTTATTGCAACATTAAAGTCGACACCAATAAATAAACTTAAACTTAAGATTGTAAACGTTCAAATGGTTTTAAATGACAAAATCCAAAGAGATC…
TRINITY_DN76_c12_g1	GTGGGATTGTTATCAATGCAGACTCAATGGACCGAATGGCCTGCACTGTAGGGATTCTATGAATAATTTCATTGCTGGTTGTGGGAATTTGCTGTGTGTAAATTGGCTGCCACATTTCTTACATTACAATTGACTGTAAAATACTTTGGGAGAAGTGAGGTGTTGTCCGGACATCAAAAAAGGTACTATAGAAATGGCACACTAAAAGATCTCTCAGCGTCAGGTTGAAGCCCAGCAGGTTTGTTTGGTGTCACGG
TRINITY_DN76_c14_g1	CAGCTGAGCTTTGCTCTATAAAATTTAAATAATAAAATTTAAAGAAACAGTTACATTAGGTCATTTGTGTCCAAATTCAAAATCTATGAAAACTTCTGCTCAGTTTGGGGTTCTTGCATCAAATAACTCTCGCAATGTATCACAATGCGGCTCCACATGTATTTCAAAGTAAAATCTCTATGCACACTATAATGGAAAATAATTTTCCAGCGATTCCGTTTGAAGAAATGTAAGAAAACAAACTTTGTAAGAAAACGTAAGAAAACGTCACATTGCCATTGGGTTGAGTTAGCTGTTTTTTATTTCTAAACACATGCCCACTTTGAATTGTCATAATCATCCAAAGTCTTCAGTTATGGGAGGCAGCTACAAATTGGGGTGGCACAGTGGCTAGCACTG…
TRINITY_DN76_c17_g1	CCTCCATTGACCTTGGTTGAACTCCTGGCTTGGGTCACTGTCAGTGTGGAGTTTGCACATTCTCCCTGTGTCTGTATAGGTTTCCCCGGATGCTGCAGTTTCCTCCCACAGCCCAAAGATGTGCGGGTCAGGTGCTTTGGCTATGCTAAATTGCCCCATAGTATGCCAGGTTGCATAGGTTAGAGAAATTAGCATGGTAAATATGTGGGGTTATGGGGATAAGTTATGGGATTGTTTTTGTGCAGACTCGATGGGCCGAAC
TRINITY_DN42_c2_g1	GAAACATTTTCCAAATTATTATAATTTGTCCTGTGTCTATGTATCTATATCTGTTTTGTATTTTTTTTCTGGTTCCAAACCAGGTTTCCTGTGATTCTATACTAATAATTTTTTGATATAACCTTTTGCTTCTTATAATGAGTGCGATTTATGTCGTCAAAGCTATGTTCTCCAAGAATTAAAATTGAAATCAGAATTAAACAAATAAAAAAATTTAGCACAACATTTTAAAAAAAAGAAACTTTTTTGTCGCTTTAAGCGTACCAACAAGCCTGCAGTATTGGCAAACCTGACGTTTTAAAGAGATCAGATTGTAAGAGAACACTGCTAAAGGATAATAGAGAAAGCGTGTTTTTAGAACTATCACACAGTGGACCGTCTAAAGAACACTTGTATTCT…
TRINITY_DN61_c0_g3	CTTCTAGATGAGTACATGGGACTTAATAGGATTGAGGGTTATAGGTAAGCCTAGTAGGTAGCGATGTGATCGGCGCAACTTGTGGGCCGAAGGGCCTGTCTGTGCTGTAGTTTTTCTGTGTTCTACATGTTCTATGTTCTATTATCAAGGGTGAATGGGAATGTAGAATTCAAAACAAATCAACTATGAACTAAATGGAGCAGGATCAAGGATACAAATGATTTATTTTTGCACATGTTCATATGTGAGGCACTTGCTCAGCCCCATAACCAATAACTGCTAGCATAATGATAATTAAATTCTGGTTTGATCCCAAGTTATATGTATCTCAAAAGCTTAGATCTGAACTTTTAAAACAGTAGAAAAAGTGAAATATTAAATTAGTTGTACTATCCAAG
TRINITY_DN61_c1_g1	TGGCCTCCTTCTGCACTGTAGGGATACTAAATCTTGCTGAAATTTTCCAACACTTTCTGTTTTGGTTTCAGATTCCACACTAATTTGCTTTGAGCACATCTTTGACGTGTGGGAGGAAACTGGAGCACCCAGAGGCAGAACGTGCAAGCTCCACACAGTGACCTGAGTGTGGGAATTGAACCTGGGTCCCTGGCGCTGTGAGAATGATTGATTAAATTCTGCTCAGCTGCCGCT
TRINITY_DN61_c1_g2	GCTAATCTCCCTCATGCTGGCGTTAATTTAGCATAACCAATTAACCTAACCCGCACATCTTTGGATTGCGGAGGAAACTGGAGCACCCAGAGGAAACCCATGCAGACCCAGGGAGAATGTGCAAACTACACGCAGGCAGTGACCCGAAGCTGAAATTGAACCTGGGTCCCTGGTGCTGTAAGGCAGCAGTGCTAACCACTGCCACCCAAGTAAGGTGGT
TRINITY_DN61_c3_g1	ACTTCAATGAAGTGCAGCATGTCGACCCTACACTTGATCAACACTAACAGACTACACTTGATCTTAGCTAAAAGGCCGAGAAGCGATTACAGAAACTAACACTTGATCTTAGCCAAAAGGCCGAGAATGTAATGCTGAGTTGAATGCTTGCTAGATTTGTTTAACTTGTCCGTTCTATTCCACCCTTAACTATGGATGCTTGAGTATACTGTTTACTCCATGTGAGTTGTTACCCTTCCCTGAGATATTTGCCTGAACCAAATGCCATTAAACCACTTGCCTCTGAGAGATTCATTTGGGATTGGCCTCAGTGTGTTATTTCAGAAATACCACACTGGAATGTGAAACATCATTGGTGCAACAGCACTGGATGCCAGCATTAGCCTGTGTTGTGTTGCT…
TRINITY_DN61_c3_g3	ACTTCAATGAAGTGCAGCATGTCGACCCTACACTTGATCAACACTAACAGACTACACTTGATCTTAGCCAAAAGGCCGAGACTCAGGGAAACAATTTCAAGGCTGTACGTGTCCATAATCAACAAAAGATCCTGCAATATCAGCACCTCCCTCTCTCCTGTCAACACTGAGTTCAGCTCAGAAACCCTCCCAAGAAAACCAGCAGCTCCCTATGTTTAGTGAGGGACTGAATCTTGCTGGACTATAGATTCACAGACTCTGGCTGCTGTCCAATACTAGGTCCACCCAGTCATTCTGCATTAATACAGACAGTGAATGACAGAGCTATTTGTCACTGGAAGCTATTACAGTCAAGTGCTGCCAGCTCACATACAGGAATACTTCAGAGCAATATTAGTG…
TRINITY_DN61_c4_g1	TAAAAGAGCACATGACCGAGACCTTGTGGTCAGTCCAGTGTTAGACAAAGCCATGAGGACAAATAAGCACGGACTGCAACCACCTTAAATCCTTTACCTTGTTCTTATAATTAATAAATCCACACAGTTAACCTACTTAAATCTATGAAGACTTCAGTCAGACCTGCCAATCAATATCTAACACACTACAACATGGTGGCTGCGATTGGAAAAACTCATAAAAATGCAGAAAAAAACTAATATCCTGCAAGACTAAAGACAAATTCAAAGAAGCATTCTGACCTGAAGATAAGGCAGAGAAAGATTGCGAGAGAAAATCTTCAAAGAAAGGCTTTAAAAGTGAAGCTGAAATTTAAAATTCGTCATGGTAGGGGAAGACTCAAAAGGATCTCTTGGAAG…
TRINITY_DN61_c5_g1	ATCTTTGGACTGTGGGAGGAAATCAGAGCATTCCCAAAGAAACCCACACAGACACAGGGAGAATGTGCAAATTCCACACATACATGCTGAGGTGTGAACCCCACCAGAAATTTAAGCTATAAATTGCAAACACAAAGTCTAAAGTTGTAAGGGTTCTATCTGAACTGTTCTCTTGACCAGAACCACTGCAGATCCTATTCTACAAGGGGGGTCCTGCTAGCTTTTTGCGCTTAGCAATTACATAGGGTTGGGGATTTTTTTTGTTCAAGTTTGCCCTAGCCTGTATTAACATATATGACATTCGCTGAAATCGTAGAAAAATAGCATTTTCGCAAGTGCTTCATAAAGAGTGATGGAAATCTGCAACTTACTCTCCACATATAGTAAATGGTAGAAGTT…
TRINITY_DN61_c6_g1	GGGTCTGGGTGGGATTGTGTTCGGTGCAGACTCGATGGGCCGAAGGGCCTGTTTCTGCACTGTAGGGTTCTAAATGTGGGTAATTGGGATTAGTTTAGGGGTTTTAAAAAAAGGGGCAGCATGGATAGGTTGGGCCGAAGGGCTTGTTTCCATGCTGTAAACCTCCATGACTCTATGCACAACCCTGGGAGATTCATTTCAACTTTGGAATGATTGGGGTCAAACTGTGTAAAACTTGTATTAATGGCCAACTGCTTGAAGCAAAGGTTGAACTCTGAAAGAAGACACTGACTGGGATCTTCCAGCTACATTCGCCCCAAGACTGAAAAATCCTTCCTGAGGTAAAAGGACCTTTGTGTGGTTAAATTCGATGATCGGCCATGTTCAAAATGAATGGTG…
TRINITY_DN61_c7_g1	GACTTACCTTGCTAATTCCCCCTAACTTACACACAAAGGGACAATTTAGCACAGCCAATCCACCTAACCCACACATCTTTGAACTCTAAGGGGCAATTTTGCATGACCAACCCACCTAACCTGCACAAATTTGGATTCTGAAAGAGCAATTTAGCATGGCCAATCCATCTAACCTGAACATCTTTGGACACTGAGGGGCAATTTTGCATGACCAACCCACCTAACCTGCACAAATTTGGATTCTAAAGAGCAATTTAGCATGGCCAATCCATCTAACCTGAACATCTTTGGACACTGAGGGGCAATTTTGCATGACCAAC
TRINITY_DN61_c8_g1	ACCAAACCAGCATGTCTTTTGGAGGAAACCCATGCAGACATGGGGACAACGTGCAGATTCCACACAGACAGTGACTCAAGCCGGGAATCGAACCTGGGACCCTGGCTGTGAGGCAGCAGTATTAACAATTGTGCTACCATGTCAAGAACAAAAACCTGTTCTCCTTTACAAAGGGCTTTAGCTATCTCTTTAAAGCTCACCGATTAATCCCTTACCAATTAATTTCAGTGCCTGAAGAATGGGACAAGAAAGCATTGTGCATGCCCCATATTCTACCTATTGCAAACAGGATCCTACAACAGGCAGGGGAGGCCATATTTGCATATTTCACATATTTGGGACAGAAATCCAATGGTTGAAGCAGGAGAATGGGGAAAAACAAGTATATACTTAATTTGG…
TRINITY_DN61_c9_g1	CAAGAGTTTCACATTCAACATCAATGGGGACGATGGCTCGATCGGTGTGTGTGTGTGTGTGTCTGTGTGTGTGGACCAGTTAAAAGGCCAGTGACTATGAAACAGATTTCATTTGAACTTAAGCCTGAAGATTATGAAACATTTCATTGTTAATAAGCTGATCTGATAGTACCGGGGTCATGTTTGACACTTTATGTAGCATATTAATTTGCATATAAGATGTAGGTTTGAAAAAAATTTTCATTGGGGGACTGCATCTCATAGGCAGATTAATACTTCTGTTCTCTCCCAGGAAAATACATGATGGGGTGGGGAGAACATATTGTGGAGATGGGTTCAGTCTCTAGCTTGCTGTGTAGCCTATATGCATTTGTGGCATATATACACACCAATACGGTA…
TRINITY_DN61_c11_g1	CGGTCATCCAGACTCTCAAATTTGACTCTATTCTCTCTCCACAGCTGCTGTCAGACCTGCTGAGATTTTCAAGCATTTTATTTCTTGTTGCAGATTCCAGCGTCCACAATATTTTGCTTCTATTTTAGAATAACAAATGGATTGGCCATTCCACAACTTATTTTGATGTTCATTCCTCTGACTTGATGCTTTTCTCACATAGCAAGTAATTGAGAGTATTACAATGAAAAGTGCACAAGTGGAATCTGAATTCCATTCCTACGCCACAACTTATCACGTGCTTTGCCTTGAACTGTATTTGCAGTCAGAAATTATGGACCCTCGTCAGAACCTCTGTCTTAGTCTCATTGCCCTAGAAGCGGGTTAACTAATAGTGCCATTTGTCACTGACAGCATTTG…
TRINITY_DN61_c14_g1	CTCGCTCACCCCAAAATCAGAAAATCCCGGATCCAAGGTCAACAGACCTTTCCATGGTCCACGCCATGCCTGCTTCGATTCTCGTGGGAGGCGGAATGGGAAAGTTTTCCCCAATGTCCTCAAATTGGGTTTGGGTAGATTTATGGCCCACAGGCATTGTTACATTGTGCCATTTTTAAAGGATCTTCCCATTAGCATAAAGGCACTTGCAATTTCAGACAGTGGGCCTCTTTATTATGTAAATCAGAATGCTATGATATAGTTAGGACGCAATGTTAAAGTGACATGGTTAGAGCATTCCTTGCACACTGTTCATTCATGTCTCTTCCAATTTGGCAACTTAAGCTGTAAGCTCCAGAAGCAGCACCAAAACTCTTTCCAAGTTAGGTTTGTGTGAAA…
TRINITY_DN61_c16_g1	GGCTATTTCCCCGGGTTGAAATGGCCGCTACGAGAGGACACAGATTTAAAGTGCGGGGAGGCAAGTACAGAAGTGATTTCCCCGGGTTGAAATGGTTGCTCCTAGAGGACACAGATTTAGGGTACAGGGAGGGAAGTTCAGAGGTGATGTTAGGGGTAGGTTTTTCGCCCCGGGTTGAAATGGTTGCTACGAGAGAACACAGATTTAAGGTGCGGGGAGGAAAGTAAATAGATTCTCAAAGGCTATTTCCCAGGGCTGGAATGGTCGCTACGAGAGGACACAGGTTTAAGGTGCTGGGGAGCAGGTACAGAGGAGATGTCGCTATTTCCCCGGGTTGAAATGGTCGCTACGAGGGGACACAGATTTAAGGTACAGGGAGGGAAGTTGCCGTCCATTGGG…
TRINITY_DN61_c18_g1	AAGCTGAGAATCGAATCTGGGTCCTTGGCGCTGTGAGGCAGCAGTGCTAACCATTGTGCCACCATACTGCCCATGATGGTGCGGTGGTTATCACTATTAACACTTGTCATTCTCTAATGGCACCATTAACAATTAGCCCCTTTGTCTTATGTCCATGATACCTTTGTGGGGATGTAGCCTGGATTGCAAATTTTCAGTTTCCAAGTGGATTAAATAGTATAAACCAGGATAGCGGGTTCCACACCATCCTGAACAGAGGATCCTGAGGCCATGAATTTGTTAAGGAGTAAATTAAAAACTAATTTGCACGAACAATATGTCACTGTGTGTGGGAGAAAATGTATGGAAGGAGCTCCCCAGAGGGACACTTGTAGCAAGTCAGATTGATTCATCGAAATG…
TRINITY_DN61_c35_g1	GGATAACATTGGAATAGTTTAGGTTAGAGGGTCATTAGATTGGTTCCACTGGTCGGTGCAACATCGAGGGCCGAAGAGCCTGTACTGCACTGTAATGTTCTATGTTCTACCATAAGAGATTTGCCTGGGTGCTGCCTAGATCAGAGGGTGTGAACTACAGGAGAAGCAGGACAAATTGGGGTTGTTTTCTCTGGAGCAGCAGAAGATCTGATAGAAGTCTATAAAATTATGAGGGGCATAGATAGGGCTGACAGGTAGAATTTTTTCCTAGAGTTTGAATGCCCAATATTAGGGGCCGTGCACTTAAGGTGAGAGGGGGAAAGTTCAAAGGAGATACAAGGGGCAAATTTATTACACGATGAATGATGGGTGTCTAGAACATGCTCCCAGGGCTAGTGG…
TRINITY_DN61_c36_g1	CCCCCACCCAGAGGTCACCCCCTCGCTGCTTTTCTCTCTCTCTCTCTCTCTCTCTCCCTCATTCATCCTTCTCTTGTCTTTGTGTTTGGCTGCACGGTTGAAGAGCTCAGAGTGAGCTTGCTTCCTTCTGGAATGTTCTAGCCTGATCTCTGAATGTGAATTATTAAAACTCTCAACATCAGCAGGAGGTGGAGCGAAAACTTTCTACGAATAAAGCTTCAGATCTGTCTGAGCGAGGGGGAGGTCTCGTCTGAGTCAGTAAGGGACGGGTTCCACAGCACTTAACCCCCCTGAGACCTGCCCCAACCACGCCGAGAGAAATACTCCAGGAAACCAGAATAAAACTTCCAGGGTTGGTGCCGAGGGAGCGCCCCGCGCTGCGGGGGGGTTGGTACATAA…
TRINITY_DN61_c38_g1	GCAACACATGTTTCAATAATGTTCCTGCATCTCTCTTGCCATTCAGCCCCTTGAGCCTGCTATACCATTCATGGCCATTAGCTTTAGCTCCAGATTTCTGATGACCAACAAACGGGGAAAAAGCCTGTGATCTCTCCAGCGTTTTTTGATGAAATTACAGCTTGGTCTTTTGTTAACGGAGGCTGCAATATTGTCCAAGCCTCGCAGACATTGGCAAGCACCCTGCACAAATCTGTTCCCAGAACAGAAACACTGCTCGGGGCATTACACAAGCTGAAGAAACAGTGGAGATTTGGATGCAATTCTGCCAACCTAAATCCTGATGGAATGTGCCAAAGTGAGAGGGTCACAGCGACTGATTAATCTGCATCAGTCTGACCCTGGGTTGAATAATCTGAC…
TRINITY_DN61_c39_g1	GGTTAAAAACAAAGGGACAGCATGGACAAGTTGGGCCAAAGGGCCTGTTTCCATGCTGTAAACCTCTATGACTCTATGACAATTGCGGCACATGTTCCACCCTGGCTGCCAAAATAAAGGAAGTGGAGGGATGGGTTGGTAAGTTTGCCAACGACATGAAGGTTGGTGGGGTTGTGGATAGTTTGGAGGGATGTCAGAAGTTGCAGCATGACATAGATAGGATGCAAGACTG
TRINITY_DN62_c0_g1	GCTGGAAATCTCTTTCTTTGTTCTTGGATCTTTGTGGGAATCATCCTTAATGGGGATAGGGCCTGGGTGGGATTGTGATTGGTGCACACTCGATGGGCTGGATGGCCTCTTTCTGCAGTGTAGGATTCTGTGATTCTAAGAACCTATCTTTCTTTGATCTTTATCATATATTCTGGAAAGTTATGTGCTGGATTTGATATTCATATACAACTCACTTCTATGGAGTGTGTTTCCTGTTAAAATGGCAAAAATTAGCTGATGCACTACTAACGCATCCATAATATTTTCCAAAATGCCACTTTTGAATCTGCCACGAGGCTACTTGCACTTTCTTTGACAATTTCACTGAAGAATTAGGTAGACGTCAACAGAAAACCCTTCTGAGTCTGTAATTATGTG…
TRINITY_DN62_c0_g2	TTCTACACTTGTTTCAAAAATGACTATCTTGAAAAGCAGAAAGGTGGCACAGTGGTTGGCATTGCTGCCTCGCAGTACCAGGGACCCGTGTTTGATTCTGGCCTTGCGTGACTGTTTAATGTGGTATTTGCACATTCTCTCTGTGTCTGCATCGGATGCTCTTTTGGAGAGTCAATATAGACTTGATGGGCTGGATGGCCTCTTTCTGCAAACTTTATGTAAGTAAGGACGCTGGAAAAAGAGCAATTTAACCAGGCTGAAAGGGCCTCCAAATCTCCTCAAGAAAGGAACTGTATGATTTGAGAGAGAAACATAATTGTATAAATGGTAGAGAAGAAAATATTGCTTTACTTAACCTTTTAAACTTACTTTCAACTACCTCTCTTGCAAGGTTTTCTG…
TRINITY_DN62_c2_g2	AGGGTGTGACAAGCTTGACCAGACTCCCAGTAACCTGCAGCAGCAGCAGCAGCAGCAGCACACCATGACCTGGAGGGCCGTGCCGCAAGCTGCCACGGACGGGACGCACCACATCCTGCAGGCTCAGCCGGCACCGACACCGCAACAGCAGCCGCAGCCACCGTCGCAGCCGCAGCCGCAGCAAGTTCAGATTCAGGCGTCGCAACCCCAACAGGCCCAACAACAGATATACAACTATTAGCGGATTACTGCTCACTCCGACCACACACAGACAAGTGAAAGAGAATTCCCCCCCCTCCCCAATCCACGTGATCAGGAACACCCAAGGCGAGGCTGACTGTGACTGACGTTCAGCACCTTCACACGGGGAAGTGTAAACGTCTTTGACACTTCTTGTCT…
TRINITY_DN62_c3_g1	GGTGGTTAGCACTGCTGCCTCACAGAGCCAGGGACCCGGGTTCGATTCCCGGCTTGGATCACTGTCTCTGTGGAGTTCGCATATTTTCCCTGTGTCTGCATTGGTTTCCTCCAGGTGCTCAGGTTTCCCTTGTTAGTCCAAAGATGTGTGGGTTAGGTGGATTGGCCATGCTAAATTGACCCTTAGTGTGGGGTTTAGTAGGGTTATGGGGATAGGACCCGTGTGGGATTGTGGTCAGTGCAGACTTGATGGGCTAAATGGTTGCCTTCTGCAGTGTAGAGG
TRINITY_DN62_c6_g1	CCCCCACCCCACCCCACCAATCCCTCTCTGTGGAGGGATGGTGCCTTACGGTGATATCACTGGATTGGTAACCGTGAGGTGCAGGTTAATGCTCTGGGACACGGTTTCAAATCCCATCTCAGAGTAAATGGAATTTAATCTGGAAGTGAAAAATAGTCTCACTAATGGTGATCACAAAACTTCATTAATGTTTGTAACAATTTGTCTAGTTCCTGTAGGGAAGAACTTGTATACAAATGTACAAATTAGGAGCAGGAATAGGCCACTCGGCCCTTCGAATCTGCGCCACCATTCTACACACTAATGGCTGATCTAATTGTAAACTCCACCCCACACTCCCACTGACCCCCCAATAACCTTTCACTCCCTCATTCATCTCGTTCTACCTTAAAAATTGTC…
TRINITY_DN62_c10_g1	CCCCTGTCTTGATTAAACCTGTCCCTGGGCAGAGCAGCATGGTGGCACAGTGGTTAGCACTGCTGTTTCACAGTGCCAAGAACCTTGGTTTGATTCCCGGCTTGGATCACTGTCTGTCTCTGTGGAGTCTGCATATTCTCTGCGCGGGTTTCCTCCAGGTCCTCCGGTTTCCCCCCACAGTCCAAAGATGTGCAGATTAGGTTTATTTGGCCATACTAAATTCTCCCTCGGTGTACCCGAACAGGCGCT
TRINITY_DN62_c11_g1	GGACTAGCTTAGTCACTTAAAAAAGAAAGGGCAGCATGGACAAGTTGGGCCAAAGGGCCTGTTTCCATGCTATAAATCTTGATGACTCTATTAAAAGGTCAGAGCAGAAAAGATAAAACTGTAAAACAGCAGGTGCAGAAACTGAAACAATACAGGCCTGAACTGAAAACAGAAATTGAAAATGGAACTAGAGAAAGGAAACTGGCCCTTCCAATTTTAAAGGAAACAAAAACTAAAACTTAGACTTGCAACCCAAAACTGAAACTGGCTGAGACTATATAAAGTAATAGTTGCAACTTGGAGCTATTGTATTGTGTACACTTTGCAACTCAACAAGAGAAAGCAACCAAAATAAGCGATAGACTAGCACTGTATGGAATGTGGGGAGGCTTCATCTCA…
TRINITY_DN62_c12_g1	CTTTTGGAATGTTGTTCCGTCGTCTCACCTGAAGGCTTGTGGCGTTTACTATCGGGTGGACCTGTTGGACTTTGGCCTGGTGTGGTGAGACTTCTTACTTGACTGCAGAGCCATAACAGATGGAGACATTCTTACAACTTCAAACCTTCCGCTTCAAACAATACAACATCTCAACCTTAAAACACATCAGGACTATGCTGAACAACACAGACCCAACTTAATTCTCTCTTAGAAATATTGGTCTTCCTTTATTAAAGTTAAACCTATGTGTTAATATTGTTTGTCCTTAAAATTTAAAGTTTGATTAATACAAAGTAAAACATTAATGCAAAGTTTAACTTTGTATTACATGAATATTGTTTGTCCTTGTAGTAGTCTGTGGGTGGCACAGTGGTTTGC…
TRINITY_DN62_c13_g1	GCGCGTTCTCCCTGTGTCTGCGTGGGTTTCCTCTGGGTGCTCTGGTTTCCTCCCACGGCCCAAAAATATGCAGGTTAGGTGGTTTAGCCATGGTAAATGTGCAGGTAGACCTGGGTAAGATGCTGTTTCGGTGCAGATTTTTTGGGCCAGATGGCCTCTGTCTGCACTGTAGGGATTTCATGGTTCTTCAGTTAAGTATCTGGTAAGTGTCTGGAACAAGCTGCCAGAGATGATAGTAGAAGCAGGTACAATTTTGCCCTTTGAAAACAAGTTAAGTGGGT
TRINITY_DN62_c16_g1	AAATTGGGTGGCACGGACAAGTTATGCTGAAGGGCCTGTTTCCATGCTTTAAACCTCTCGATGACTCTGTCTGGGCACCATATTTCAGAGCTACCCACGCTGTCCTTCCTCAGTCATTTGATTTAATTTATTATTGCCACATGTAATGGGATACGGTGAAAAGTACTGTTTCTTGCGTGCGACAGAGACAAAGCATGCCGTTCATAGAGTACGTCGGAGAAAGGGAAAGACAAGAGTGCGGAATGTAGTGTCACAGTCATAGTGAGGGGGGAGAGAAAGATCAGCTCAACATAAAGTACATTCATTCAAAAGTTTGATGGCAGCAGGGAAGAAGTTGTTCTTGAGTTGGTTGGTCCATTCACATTCTCCCTGTGTCTG
TRINITY_DN62_c17_g1	GGGGGGATCTTATAGAGACTTGCAAGATAATGAAGGGGCTAGATAGGGTAGAGGTAGAGAGATTCTTCCCACTTAGAAAGGATAGCAGGACTAGAGGGCACAGCCTCAAAATAAGCCGGGGACAGTTTAGAACAGAGTTAAGGAGGAACTTCTTCATTAAAAGGGTAGTGAATCTCTGGAATTCTCTGCCCATTGAAGTGGTGGAGGCTGCCTCGCTGAATATATTTACGTTATGGGTAGATAGATTTCTG
TRINITY_DN62_c17_g3	AGAGATTGAGTAGATTGGGCCTGTACTCGTGGAGTTTAGAAGGCTGAGGGGGGATCTTATAGAGACATATAAGCTAATGAAGGGGCTAGATAGGGTAAAGGTAGAGAGATTCTTCCACTTAGAAAGGAAACCAGAACTAGAGGGCACAGCCTGAAAATAAGGGGTCAGTTTAGAACAGAGTTGAGGACGAACTTCTTCTCTCAGAGT
TRINITY_DN62_c18_g1	GTCAGGGGGAATTAGCATGGTAATTGTGTGGGGTTATGGGAATAGGGTCTGGGTGGGACTGTGGTCGGCACAGAATTGATGGGCCAAATTATCACCACCTGTACTGTAGGGATTCTATGGGTTTTAGAGTTTAACTCAAATTGCTGTTCTGATAGACCAAAAATATCCCGAAATAAAGATCAGTAGATTTCGCACTAATCAATTATAGTTAAATGATATTTGCAAATTCTATTTTTTAAATTTGTTTCACCTTTTTTACTTTGTTTCTATTTTCCTTCCTCTTGTATTTAATCCATCAATTTTTAATTGTTTAATGTTTAATAACTTATCAACTTATGCATTGGTTTAACTTGCAACAGGAACTTTTTTTATCAAGACTGTCCAGCCTGCTGAATTTTG…
TRINITY_DN62_c20_g2	GGCTGAGGGGCAATCTTATGGAGGTCTATAAAATAATGAGGGGCATAGATCAGCTAGATAGTCAATATCTTTTCCCAAAAGTAGGGGAGTCTAAAACTAGAGGACATAGGTTTAAGTTGAGAGGGGAGAGATACTAAAGTGTCCAGAGGGGCAATTTTTTTCACACAGAGGGTGGTGAGTGTCTGGAACAAGCTGTCAGAGGTAGTAGTAGAGGC
TRINITY_DN38_c0_g2	GGAGCGAGTCCCACATTCTCTCCACCCGCTCCCCCGTGAGAGCGAGTCCCACATTCTCTCCCTTCGTGGGAGCGAGTCCCACATTCTCCCCCCTCCGTGGGAGCGAGTCCCACATTCTCCGCCCCTCGTGGGGAGCGAGTCCCACATTCTCCCCCCCATCCTTCCATGGGGAGCGAGTCCCACATTCTCTCCCCCCACCGTGGGGGAGCGAGTCCACACATTCTCCCCCCGCCGTGGGAGCGAGTCCACACATTCTCCCCCCCATCCCGCGTACTGGGCACCTTACCCGAATGGTGGTAAACGCTCGAAACAAGAGCGAAAGAGTTGACGGCGGGAAATCACTGTGTGCGAGAATGACTTGGTGACCGTTACAGAGACGGGGTCGCGGGGCGGTCTACG…
TRINITY_DN38_c0_g3	TATAAGATCATGGCTGATCTGTCGTGACTCAGCTCCACCTTCCCGCCCTCTCCCCATCTAAAATCATAGCATCGTAGAATCCCTTCAGTGCAGAAGAGGCCATTCAGCCCATTGAGTCTGCACTGACTCTAACAGAGGATCCTTTTACCCCCACCCTCTTCCCGTAACCCCACACATTCCCTATAGCTAATCCATCCAATCTACACACCTTGGGACACTAAGGGGCAATTTAGCATGGCCAATCCCAACATAAATTCTGTGAGTATGATTATGTGTGTGCCCATGTGTGATTAAATCCCAGGATGAGAACATCGCTGGCAAAGCCAGCATTTATTGCCCATTCCTGATCACCCCCGAGAAGGTGGTGGATCACCCACAGCTGCAGTCTGTGTTACAGGT…
TRINITY_DN38_c0_g4	CCCTTCTCATCTGTATTTCAAATTCAACCGCACCCTGAGATCGGAGAGGAACCCTGACCACGAGATCGTTACTCCCTCCCGCCGCGCCGCACAGGACCAGATCCAGGGTGGCTTGCTCCCTGGACAATCTGTTGGAGGAAGGAAGCTATCGCGGTCACGTTCCACCAGCTGCCTTGTCCTGGTTTGACTGGCCGATCTGTCGATTAAACACCCCCCCCCCCCCCCCCACGCCCGTGACAATTGCTGTACCGCTTTTTACACGCGTCAACTTATTTCATCGTTAACTCCTTGCCCCAGCCCCGATTCCGTGGACCGATCGGATTATTATTATTTCTAACTTCCGCCCAAAACGGATTCAAGCTCTTTCTTTCCCCCTGCGTCACGGCTGCCCCCCCCCCC…
TRINITY_DN38_c2_g1	AGTCCCACATTCTCCCCACTCCCGCCCGTGGGAGCGAGTCCCACATTCACGGGTGGGGCAGTAAAATTCTCCATACCAACCCAGGTCTCGTATCCGGAATTTTCCTTATTCCACTTTCCCAGTTTCTTTTTCTCCTTTCAGTAACAATGGAGGGGAGAGAGATGGGCATCTGCCTGCGACAGTGCTGAGTACAGGTATAACCTCTGCTTTCCGGTCCTCTCCCCCTACAGGACAGACAGTGTTTTGATGCAATGTTACTTTCTGTAATCGGTTTCCGTGTTCCCAATATTCCCCCATTTCCCCATTCCGCTACACAGTTCAAATTTAATATCTCAAGTGGTCTTTGCCCAGAAGTTCGCACACTGCACTTCACACGTTTGTAACCATTTGCCGTTTATG…
TRINITY_DN38_c4_g1	TGGGATGGAGCACTTGAGCAACAAAGAGAAGCTAGGTAGGCTTGGATTGTTTTCTTTGAGCAGAGAAGACTGAGGGGGACCTGACTGAGTTGTATAAGACCACAACGGATATGGACAGGATTGATTGGAAGTAGCTGAAGGGTCAATAATGAAGGGCATAATTTTAAAGTGAGGGGCAGGAGGTTTAGAGGGGATCTGAGGAAAAACATTTTCACCCAGAGGGTGGCACTAGTCTGGAATGCACTGCCTGAGTAGAGATAGGAAACCTCACAAATTTTAAAAGAATCACAGATAAGCACTCAAAATGCCATAACATTCAAAGCTAAGGATCAAGTGCTAGAAAGATTAGTGTAGATTTAGTGTAGTTTTGTCGGTGCAGATTTGATGGACTAAAGGGCC…
TRINITY_DN38_c5_g1	CTCATCTTGGACCCTGTCACTTACTGAATATGGGACATGTGAAAAGATAAGTTGGAGATGTGTGTGCTTAAAAAATAATTATGAAATTTATTTTTTTAAGGTATTTTAATAAGAATGGCTTTGTGATATTGTTTAACGGAGTCAGCTGACAGGAAGAGGAGGAGTTTCTTTAAGAGATGGTGCTGTTGATGTAACGTTGTATTTGTTAGTGAACCTCTCCAGCCTATCAGCTGACACTGTGACTGTCCAGGACCAGATCTTAACCTTGTTAACCCCCTTTACTCCCTCTCAGATGATGCAGAAATAAGTTATAGTGTTCTTCTGATCTCCTCTTTGTTGAAGACAAAATCTCACTGTTGGGGGAAAATTTCACATTATCAGCCATTCTCAGCTGGTTGA…
TRINITY_DN38_c6_g1	CACACACTGATAAACACAGAGACATGAACACACACATATACACATACACACAAACACACACATGCACACAAACACACATGCACATGCATGCACACACACAGACATGAACACGTTTGTAACACAGAGACATACATGCACACATGCACAAGCACACACATACAATCATGCACACACACATACACAAATGCATACACATACATGCACTCACACACATGGACATACATACTTACACACAAACATAGATGCACACATGCGCACAAACACACACTCAGACACATAAACACAGGCACACACGCAGACACACATACATATGCATGCATGCAAGCATATACATAAGCACACATGCACACAAACAAACACACGCTCACATACATATGCTCACATGTACAGACGGACACA…
TRINITY_DN73_c0_g1	CTCACACTTGCTTGCTCCCTCCGTGTCTGTCACACAATGGCACATAACACACACCCATGACATGCACTCAATCATTAATCATTCACACGCACAATGACACAACACACACTCATATACTCACATAGAACTCACTCATGCACACACACACATACACACACACACACACTCATTTGCTCACTCACACTTGCTTGCTCCCTTTCTGTCTGTCTCACACACACACACACACACACACACACACAATGGCACATAACACACACAATGGCACATAACACACACCCATGACATGCACTCAATCATTAATCATTCACACGCACAATGACACAACACACACTCATATACTCACATAGAACTCACTCATGCACACACACACACACACATACACACCTCATGCACACACAC…
TRINITY_DN73_c2_g1	TGTGTGTGTGTGTGTGTGTGTGTGAGAGACAGACACGGAGGGAGCAAGCAAGTGTGAGTGAGCAAATGAGTGTGAATGTGTGTGTAATGTGTCATTGTGTGAGCGCGAGTGTGCATGTGTGGGGATGTCTGAATGAACAAGTGAGTTGTATATGAAAGAGTTGTACGTATGAGTTGTGTGCGAGAGCTGTATGTGTGAGCTGTACGTTATGTCATTGTGTGTGCGTGTGCATGTGTTGTCTCCCATAACATCTCAAACCATTACATCCAGTGACAACATTGCGACCTGCCACAATCCCTTAACAATCCCCTGCGTAGATAAACAACCCCCCGCTCTAAAGAAATCCCTACCAAACATTACGATAAACCCCATCACCCCATAAACATATAATCCCCACAG…
TRINITY_DN70_c2_g1	GCGGGAATGGGGCCTGAAGGGGATTGTGTTCGGATATGTGGGGTTACGGGAATAGGGCCTGAAGGGGATTGTGTTCAATGCAGACTCGATGGGCCAAATGGCATTCTTCTTCATGTAGGGATTCGATGGAAGTCTCCACAAGAATACCATTAATGTTAACAGGTTGTGAATTATTAAGGGAAGAGAAATTACTGCAAATTATTCTAGCTACAAGTGTGCTTTTGTTTCAGAAAATATTTGTTCTTTGAATGGTATTGTTTTCAGATCTTTGCGGGTAGTGATAAATGTTTATTTATGGTTGCAAGTAATTTAGCCCAGGAAGCATGCATAGTAGCCGTGCAAGCATTAGAAAATGTGAACATACTGCATGGATCCAATCTCTTTCTCTGTTAATACAAG…
TRINITY_DN70_c2_g2	GTGTGGAGTTTGCACACTCTCCCTGTGTCTGCGTGAGTTTCCTCCAGATGCTCCGATATCCTCCCACAGTCCAAAGATGTGTGCGGGTTAGGTGCATTGGCCATGTTGAATTGCCCGTCAGTGTCCCAGGATATGTAGGTTGGAGGGATTAGTAGGGTAAATATGTGGCGTTATGGGAAAGGGCCTAGGTGGGATTGTTATTGATGCAGACTCGATGGGCCAAATGGCCTCCTTCTGCCGTGTAGGGTTGCTACGATTCTATGAATGTTTT
TRINITY_DN70_c3_g1	AGCATGTCTTTTGGACTGCGGGAGGAAACCGGAGCACCCGGAGAGAACCCACGCAGACACGAGGAGAACGTGCAAACTCCACACAGACAGTAATTCAAGCCGGGAATCGAACCCGGGTCCCTGGCGCTGTGAGGCAGCAGTGCTAACCACTGTGCCACCATGCTGCCCATTGGAAAACAAGAAGATCTCTTTGTCTCTGTCGTATCTGGGATTAAGAACCTACTGATGAGCATGAAATGATTGCCATTATCACTAGATTATTAATCCAGAGATTCAGCTAATGTTCTGCAATAGGCTATTAATCCAGAAACTCAGCTCAAGTTCCCGGTTCGAATCCCGCCATGGGGGGAGTGTTGTCGAGTAAATCGGTTGGACTGGAACCTGGTGTTGTCAGACTTT…
TRINITY_DN70_c3_g2	CTAGGATATTCATTCGCATTAGTATTTAATCAGATTCTCAAACTATGACCCCCTAGTTCTGGACTCCCTCATATGACAGACCTGCCATCTGAGTAATCAGCCTGGTAAACCTTTGCTGTAAGATTGACTCTCAACTGCCCTCTAAACAAAGATAGCTTGGGGTGGGCAATAAATGCTGGCCAGCCAGCGACGCCCATGGCCCACAAATGAATAAAAAAAACCATCCAATATTTTTGGCATTGATTACAAGAATGAGGAAGATCAGAAAAAGCTGTAAGGACAGAGCGCAGTGGGTTTAAAGCTGTTACCAGAAAGTTTGGATGAGATTCTATTAACTGGGAGCTACTATTCTATTTACATCTAATGGTTAATTTCTGGCATTTATATACCATTTGCCTG…
TRINITY_DN70_c4_g1	GAGAGCCCACGCAGGCATGGGGAGAGCGTGCGGACTCCGCACGGACGGTGACCCAAGCCGGGAATCGAACGCAGCACCCTGGCACTGTGAGGCAGCAGCGCTCACCATTGTGCGGCCCTGTTTGAGCTGTTGAAAAGTATTAAATCTGGGGCTGCTATCATCAATGATCTGTCATCCTTGCGTGAGTCTAATGCTCGAGAATGGGCCAGTGGCACAGAGAACAGGACAGAACTTTGAGTCAGTCTAGAAGTCATGGTTAGAGGAGGCAATTCTTTTTTCAATTTATGGGATGTGGATGCGAGCATTGTTGGAAAGCTGATCTGTCTCTACACTCTAGCTATGACTGTAACACAACATTCTTTATCTATGACTGTAACACAACATTCTGCACCCTCTCTT…
TRINITY_DN70_c5_g1	CCGCACCATCAGGAACCTTCTTTATGAATCTGCCCTGTCTAACTGTGTTAGAATTTTATAAGTTTCTATCGGCCTCCTCCGGGCGCTCCGGCCTCCCCCCACATCCCAAATAGTGAATTCCACACACTTCGCACCCTCTGAGTGAAGAAATTTCTCCTCACCTCAGTTCTAAAAGGTTTATCCCTTATCCTCGAACTAAGTTCCCTAGTTCTGGATTTTCCCACCATTGGGAGCATTCTTTCTGAATCTACTCTGTCTAACCCTGTTAGAACTTTGTAAGTTTCTATGAGATCCCCTCTCACTCTTCTAAACTTCAGTGACTATAATCCTAACCGATTTAATCTTGCCTCCCAGTGAATATAATCCTAACCGACTTAGTCTCTCTTCATATGACAGACC…
TRINITY_DN70_c5_g2	GAGGGCACTCATAATGTTACAATGGCGGCGCGGGCTCGTTGGGCCGAAGGGCCTGTTTCCCGTGCTGTGCTGTTCCTCGTTTCTCGATCCTGTCTCCCTCACTGCTGCGAGTGTGGGACTCCCAACGCATGCAGCAAGGGTACACTCTTGAAATGATTGCCCCCAAAACCACCAGTGGCCGTTTCAAAAAGCTCGTCGGGTCATTGTGGAAGTCTTAATCCCATCTCCCAGTCTGAACCCAGCAAAGTGGAACCTGTCCAATAGCCCTTCTCCCCAGTTGGGACGGAGCGGCTTCCACACAGCCTGATGTGTCTCTTTGCATCTGCGCTGCTATCAACCAAAAGGTTCGGAGGAACAATTCCCTCATCTGCCCGTTCCGCGTACACCTATCCGCTTGCT…
TRINITY_DN70_c6_g1	TTCAAGTAATAATCTGTCTTCCTAAAGTGAATAACCTTATAATTTATCCACATTATACTGCATCTGCCTTTTCCCATTCACTCAGTCTATTGAAGCATCTCTGCATCCTCCTCACAGTTCACCCTCCCATCTAGCTTTGTATCATTTGGAAATTTGGAGATAATACATTTAGTGCCCTCATTCACATAATTAGTAAGTAACTAGCACAGATCCCTGCAGAACCCCACTAGTCACTGTGTGCCAATTGGAAAAATACCCATTTATGCCAACTCTTCGCTTCCTAACCAGATGTCAAGTGGTGCTACTTCGAAGAGGAAGGTACTCTGAATACTACCAATACCTCAACCAGCATCACTATCTACTCAGTATTGCATTGCTGTTTATGGGGTCTTTCTGTGC…
TRINITY_DN70_c7_g1	AGCATGGCCAATCCACCTAACCTGTACATCTTTGGACACTAAGGGGCAACTTAGCATGGCCAATCCTGTCAGCCTACTTCATAAAATCTTAGAATTTCTATAGTGCATAAAGAGACCATTCGGCAGAATCCCTATCGTCAGAAGGAGGCCATTCAGCCCATCAAGTCTGCACTGACAACAATCCCACCCAGACCCTATTAGCATGACCAATCCACCTAACCTGCACATCTCTGGACACTAAGGGGCAATTTAGCACGGCCAATCCACCTAACCTGCACATTGACCCTATCCCCGTATCTCTACACATTTGCCTGCTAATCCCCCTAACCTACACATCCCAGGACACTAAGGGGCAATTTTGGCATAGCCAATGAACCTAACCCGCACATCTCTCCACCC…
TRINITY_DN70_c7_g2	GTTTTCAGTGGCAAAATCGGGCCCTGGGTGTTCTGCAGTGAGTAACTCACCTCCTGACTCCCCAAAGTCTGTCCACCATCTATAATTCAGGAGGATGATGGAATACTGTCCACTGCCCTGCATGCATACAGCTCTAACAACACCCAAGAAGCTTGACATCTTCCAGGGCAAAGTAGCCCAGTTGATCAGCACTGAATTCATCATCTTAAATATTCATTCGGTTCATCTTTGCTGTATAGTAGTAGCAGCAGTATGTCCTCTCTACAAGATGTACTGCAGCAATTTGCCAAGGTTGCTTTGATAATACCTTCCAAACTACCAACATCTACAAACCAAAAGGATAAGGACAACAGAACATAGGAATATGCGTCACATTATCCTGACTTGGAATCATTTCGC…
TRINITY_DN70_c7_g3	CTGGAAAAAAAAAACAGAAAATGCTGGAAAATCTCAGCAGGTCTGACAGCACCTGTGGAGAGAGAACAGAGCCAATGTTTTGAGCCTGGATAACCCTTCGTCTCATCCAGACTGCTCATTGGTTCAATTCTCTCTCGACAGACTCAGGAGAGAAGTCCTATTTCCCCAAGCTCACCGTCTTTTCAATGGTCAGAGGATCTGAAGTGCAACAATGATCCCATGAAAGGCACTTCTGCTTTTGTGACAATTGATGAATGCGTGTTTAGTCTCCTCTGCTGAGTCTCCTGATCATTTTTGGGCAAGGAGGCTGCCAGCATTAGAAAGACTTGCATTTAATGCAGTGCCCTTTGTTGTCCCAAGAAGCCCTAAGGCACTTTATAGCCAATTCAGTAATAATAA…
TRINITY_DN70_c7_g4	CACACACGTACACAGACACAGACACACAGAGACATAGACACACACACACACACACACACACAGAGAGGAAGAATGAGAGAACCTGCAGAAAACAACGCTGTAACCTCAATGAGCGAGTTGACAGACTGGAGAATTGAAGCTGGTTTCATAACCTTTCACCCCTTGATAAGAAAACTGTAGCTGGAAATGAACACAGGAACTCCAGGATTTAACACGGTGAAGGATGAGTCCAGCTCGAGGCTGTTACACTGCCCCCACTTCCCCCCCACCCCCGCACCCAAAGTTAGGTGAAGTCTTCAACAGCAAAAGGAATCTTTCCATTCCAGCAGCGGTCAGTCTCACACAGAGAACTCGGGTTCGTGTTTCAGAGTCAATCTATCCCAGAGCTGTCCCTCCCAT…
TRINITY_DN70_c8_g1	CTCTGCAGTGATCAGGGTTCATTGCCCTTTAACCAAAGAGAGTAAATAAAGTTTATTTATTAGTGTCACAAGCTGACATTAACACTACAATGAAGTTACTGTGAAAATCCCCTAGTTGCCACATTCCTGTTGGGGTACACTGAGGGGGAATTTAGCATGGCTAATGCACCTAACCAGCATGTATTTCAGATTGTGGCAGGAAACCAGAGCACCTGGAGGAAACCCATGCAGACACATGGAGAACATGCAGGGGGGCTGCAGCAGGACTTGGACAG
TRINITY_DN70_c9_g1	CCAGCCACCTCTTGAATATATTTAATGTTTTGGCATCAACTACTTCCTGTGGTAATGAATTTCACAGGCTTATCACTCTTTGGGTGAAGAAATGTTTCCTCATCTCCATCCTAAATGGTCTACCCCAAATCCTCAGACTGTGACCCCTGGTTCTGGACACCCCACCATTGGGAACATCCTTCCTGCATCTACCCTGTCTAGTCCTGTTAGAATTTTACAAGTCTCCGTAAAATTTTCTGCCTGCCCCCATTTGTCTGAATTCCAGTGAAAACAATCCTGACTTAGTCAATCTCTCCTCTTTCATCAGTCCCGCCATCCCTGCAATCAGCCTGGTAAAGCTTCACTGAAATCCCTTGAGAGCAATTGCCTCAGGTTGGGATCCATCCATCCATTCTGATC…
TRINITY_DN70_c11_g1	CGGTCAGACCGCGAGCGGCCGGAGCGCGGGAAAAGGAGAGGCTGTGATTGGAGGATTGGCTGTCCCGGGGGAGGGGCGGCGGCGGCTTCTGGAAAGTTCCGGCGCTCCCGGTGTGGCCGTCGGCGCCTTGGCGGCGGAGAGACTCGGGGAAACTTGCCGGTGGCCAGCCCGCTTGGAGGTGGCAGCGGCGGCGGCTGTGTTCCCGAGGCTGGATCGGAGCCGCGGGCTGTGTGTATCAGAGAGCCCCGGCATTGAGCGCTGGGAATGGCCGCTCCCCGGGGAGTTGGTGATTCTCGGAGCCCCGGGTGAGGAGCCGCCTCTCTCCCCGGCTCCAGGAGTGGCTGCTGCTGCTGACAGTCAGTAACCGGCTGGTGTGAGGAGACCGCGGGCCCAGCACAC…
TRINITY_DN70_c12_g1	GTTTCCCGTGCTGGATTGTTCTTTGTTCTTTGTTTGTTCTATCCCCTTTGAATTCTGTTATCGACCTTGCTTTGCTTGCCAGTTGCATCACTGTGGGACCCGTGAAAATCCTGCCAGTGGGAAGGGCTGGAAAATCTACTCTTTGACTTCTCTTTAAGCAAATTTAAGTATGCTTTTATAGTAAAATACGGCAAACGTCTTAATTGAGACTTAAATCTTAGTCAAAACTGAATTATTCAGGGCATTAAAAGCCAGAAGGCCCTTTGGCTAATTCTCTACACAATCTCAAATCTTTAGAGCCATAGAACATTACAGCACAGAAACAGGCTGCCATGGCCAAATAGGGTTATCCAATCCTGTTTTTAAGTATTATTTTGTAAATTTGTCCCAATCCCCTTT…
TRINITY_DN70_c13_g1	GATTTTTGAATAGACCTACCTTGCATTAAGTTGATCTTTCCATCCTAGCTATGACTGTAACACTACATTCTGCACTCTCTCATTTTCTTCGCTATGAACGGTATGTTTTGTCTATAGCGTACGAGAAACAATTCTTTTCATTGTCTGCTAACACATGACAATAATAAATCAAAATTAAATATGTATTTTGAGAATAATGCTTATATTATGAATAAAAAACCATGAGCATGTTCTTCC
TRINITY_DN70_c14_g1	ATGTGCAAGCTCCACACAGATAATCACTCAAGGCTGGAATTGAACTCAGGTCCCTGGCACTGTGAAGCAGCAGTGCTAACCACTGTGCCATCCCTTTCTATCCTATCTATTCCTCTTACTATCTTTGCAAATTTGATCAAAGTTAAACTTCTGAATTCCAGGGAATTTAACTCTTGGAGACTAGGTATGATTCTGGTGAATTCATGCTACATTGCCTCCAAATGATTCAAATAATTCAGCCTTTTCTTCATCCACAACAGTGTTTTAATGCAGTTGTTTTATTTAGGATGTGTACCAAGGAGTGGGATGGTATGGTCCTGAAATCAGCATAGAGTGTCAATGGCTGTGGTCAATTGGTGAGTTGTGCTGCTCTAAAGTGGCAGCTCAGAATTGAAGTCC…
TRINITY_DN70_c21_g1	TTAGCATGGCTATGCCACCTAGCCCGCACATGATTCAACTGTGGGAGGAAACTGGAGGAAACCCACGCCGACACAGGGACAGCATGCAAACTCTACATAGACAGATAGTCAAGGCCTGAAGTGTACTTGGAGCAGTCTTTGAAAAGTGGAATTTGACCACCTCAGTGTGGTGGATGCCAAAATGTAGCCAAGTGGGTTAGGTGGCCAGGCCAAGGCAATGAAAGGGAAACCCATCCCATATTCCACCAATTCTGGCAGTGTCAGTGGCAAGATACCTCGGCAGAAGCAATTTCAGCACAGTTCAATTAGGAACAATTAATTTCAAGCTGAAGACGTTCGGCCTGACTTTGTAAGGCTAATCAGTAGGTGCATGTCAAAGAATCATGTTATGTTTACACT…
TRINITY_DN70_c22_g1	CAGACTCGATGGGCCGAAGGGCCTGTTTCTGCACTGTAGGGTTCTATGCTGGTTCTATGCTGGAGGGCCAGAATTCCACTATCAAGGCGAGTAGCTGAATCAGGAGATTCGTTGACTTGGGCAGACCTGCTCTTCTTTGTGCACCTTCATTCCAGTGGGTGTCAGAGGCATGATCAACAATGTCCAGGGTGCCCTTCACATCATGGACTTGACATAATCATTCATCCTTGGCCATCGGGCTCCACTCTGAACCCAGAATCAGATCAGAGGGGGAGGTGGGCCCTGATAATGGGGAGCGGGGTGGAAATCACACCTCGAGCTCAATGTAAAGGGCCGTCCTTTAATTGAAATTGTTAATCAACTGATTAGTTACACTGGAAGAAATCATGGTTCTTCCAT…
TRINITY_DN70_c23_g1	GGGCAATTTAGCATGGCCAATCCCCCTAACCTGCACATCTTGGGACACTAAGGGGAAATTTAGCATGGCCAATCCACCTAACCTACATTTGCACATCTTTGGACACTAAGGAAGTTGGACACTAAGGGGCAATTTAGCATGGCCAATCCACCTAACCTACATTTGCACATCTTTGGACACTAAAGGGCAATTTAGCATGGCCAATCCACCTAACCTGCACATCTTTGGACACTAAAGGGCAATTTAGCATGGCCAATCCACCTAACCTGCACATCGTCTGCACATCTTTGGACACTAAGGATTGGACACTAAGGGGCAATTTAGCATGGCCAATCCACCTAACCTGCACATCTTTGGACACCAAGGGGTAATTTATCATGGCCAATCCACCTAACCTTA…
TRINITY_DN70_c24_g1	GTAGCCCTGTCGTGCACCCCCCCCTCCAAAACACCCCCACCCCCCACACCACATCCCACGGGGAAATGGCATGCTTCCTGTTGGTCAAAGTTTTTGTGCCCACCTGCCTCCACGTTTGGGCCCCCTCCTTCGGAATCAAAACCTCTGCCCTATCACCCTGGAATCTCTCTCTGTGTTGTGCCATGCCGCACTGCAGTGAGATTCTGTCTCCTAAAACCCCAGGATAGCCTTTGGACTCAATCTTCAGCTGTTTTGACACCATGCCCAGGATACTTGCTTTTCTCCGTTTTTTTTTTTAAATTTCCTTTCTATGTGCGGGAGTTGTGCATTAAACTAGTGTTCTGTAGAGTTAATTTTGTCATTTTTGAGCTGCTCCCTCAGTTTGGTGTTGTCTGCAAA…
TRINITY_DN70_c26_g1	TGTTGCTGTGGCACAGCAGGTTAGCACTACTGCCTCAAAGCGCCAGGGATCTGGGTTCAATTCCGGCCTCGAGTCACTGTCTGTCTGGAGTTTGTTCGTTCTTCCCCGCGCCTGCATGTATTTCCTTAGCTTCCCTCCAACACACCAAAGATGTGGGGGTTAAGTTGATTGGCAATGCTAAATTGCCTCCTAGTTTCAGGAGGAATAGCAACCTAAATATGTGTGGTTATGGGAATAGGATCTGGATGGGATATCCCAATATGGCCACATTCGTTCCAAAACTGGAAAATCCCGACCAAGGTCAATGCATTGTTTTTTCCGACAATCGACAATGGTTGCACGGTCATCAGTAGATGTGTAATTCCAGATACTTGTTGAAAAATTCAAATTCCACCACTC…
TRINITY_DN70_c27_g2	GCTCGTAGCGATCGCGCCCGAGGCCAACAGAGAATGCCATTCTGCGAATCTCGGGGTGGGCGTGCTGGTAAAATCGGGGGGCCCTTGGTTCGAACCTGCCTAAGATAACTCAGGTGAGAAGCTTCCTCTCAGCAATGACTGTTTAACTTACAGAGATGGTCACCCCAGGTTGTTTGAGGCCTCCTTAATTTACAATGTCTGGAATTTAACAATGTTTACAAGGACACCGGGGCTGGGAAGTGGAAGCATTGCTAGCTGGGTGTGGAATTGGGACACAGATGTAGCCTCTTTTGTTTAATGACATGCATTACCTTTGAGAAGGTGACACTAGTCAGGAGCGCAAACAACTTATTTCATTGCTGGATTGTTATTTGACCTCTCAGCGGTTGATAAACAAGG…
TRINITY_DN70_c35_g1	GGGGGGAAGAATCCCTGCTAAAGTTGAAATATTCTAGCATTGTGTTTCCATGCTAAATCTTGGTGTAATTTCCAAAAGACGGGCGGAACAAAATTGATCCTGTCTGAGCTTGCTGCGCACAAGAGAAATCTGCTTCAGCTTTCATTGCGCTTTTTCCCAATTGACCCAAATGTGAAGGATTTCTGTGTATATTTCTGGTCTTACCAGCTTCAGATTCTGCTGGGATTTGTCTTTTTTCAGGATGGGAGGTGGACTGGAAATTTGAGACTTAAACATAGTTGGAGTAATTCAATCAGATTTGCCCTGCCCAGTTAATTATCATTTGATTAAATGCTGGAATTTTGGTGTTGTGCTACATGTTGCTTCCATTATTTTTGTATGTTCTAGCTGAGAAATGTG…
TRINITY_DN70_c63_g1	TGAAAGACTAGGCAGCGGCAGTTGGAGTTGTAGTTCTCCTTTTCTCATTCAGCCATTGCTGTCGGGAACCAACGAACCAAAAGAAACTTTTTTGAGGCGAGAAGGAAAATAGGTCTTTCCGAAGGAGGAACTGCCTTATTTCCCAGTTGCGTGTTGAGAGACCGGCATGGAGTAGAGTTTCACGTCTCCTCGTTCTGCTGTTTCACAGGTGCATGTTTGACGGGAGTTTTACCTGCCTGGATAAACAGATAGATGGGTACAAACAGCAGCCTGGGACAAACTGCTTCTTAAGATCGAATTCATAATGTTTCAAGAACTTCCCTGTGACCCCTGGTTCTGGACTCCCCCCACCATCGG
TRINITY_DN70_c73_g1	GGGAGAACGTGTGGGGATCAAACCAGGTCCTGGTGCGGTGAGGCAGCAGTGCTAACCATTGTGCTGCTCCAACTCATCCAAAATCAGGATTAAAACGTAGCTAACTTCATCTGCACCTGGTCCATGTCTGAAGAGTAATTGATGTGGAGATGCCGGCGTTGGATTGGGGTAAACACAGTAATAAGTCTCACAACACCGGGTTAAAGTTCAGGCCAAAATCC
TRINITY_DN11_c0_g1	TCTGCACTGTAGGGATTCTACAATTCTACGTGGGAATTTTATGTGACTTGATATCAAGTTCTCTCTGATAACTCTGCTGTGAAATACTGTTGGGATGTTTTACTATGTTCAAGTTGCAATCTGTTGTCAATGCACATCTGATAGCAGTGGAAATATAATGGGGAATAGCAGCATTTAAAAACTTTGTCATGTCACTGATTTGAAATTCTTGGAAAGTTGCTAAACAAGTGGATAAGGCATTCCAGTCAGGTGGCACAGTGGTTAGCACACTGTGAGACAGGGCTGACAGATCATGCGTGATCCGATCAGTGCCTTTTTGGAGCAGCCCCTCCCATTCCCTGAGATTCTCTTCCACTTGCCACTTCTCTCTCCTGACCCTGCGTCCCATTCACCTGCGTC…
TRINITY_DN11_c1_g1	CCCCGGGTGCTCTGGTTTCCTCCCACAGTCAAGGATGTGCGGGTTAGATGCTTTGGCCGTACTAAATTCTCCCTCAGTGTTACCCGAACAAGCACCAGAATGTGGCAACTCAGGGAACAGAAAGAACAGAACCTACAGAGGAAGGTGAAGGTGGGCACCAGAGTGTGGCAACTCAGGGATTTTCACAATAAAACTGTTTCACTATAAATTTCTTTGGGTCATCTTGTGAATACGCAAGGCACTGACAAATCTTTCTTAAACTGTACCTGTGTCACAGTCAAAAACTGCTTTGTTTATTTATTGGTGTCACAAGTAGGCTTACATTAACACAGCAGTGAAGTTACTGTGAAAATCTGCTAGTCACCA
TRINITY_DN11_c3_g1	CCAGCAGGATTGTCTGGTCCCGCGGCAGTGGGTGGAGATTTGGCCGGGTGCCGGGTTCTCCGGAGAGAGAGAGTTTGCTGATGCACTTTATATATAAATAATCTATTGTAATTGAAAGAAAATTTAATTGATTTCCATATTTTTCAATATTTCTTAATATCCACAAGGTGATAGTATATTAATTTTTCTGTGGCAATTGCAGATCTGCTTTATACATTTCTTGATTTCAAGTATAGTTTGAAATGCGTTTGACAAAATTGAGAATCACATCAAACAGATAGGTATCTGACTTATTTGCAGATGAACCAATTAACCATGGAACTCGTTGGAGAAATTGTCGTTCCCTCAACTTTAATGAAACACTGGGCTGGGTTTAACAAGATACCAAGTCTCCCCACA…
TRINITY_DN11_c4_g1	TCCATGCAGACAGTGACCTAAGCCGGGAATTGAACCTGGGTCCCTGGCGCTGTGAGGCAGCAGTGCTAACCACTGTCATTGTGCTGCCCCCATATGTAATAACCACAGAGAAAGGAACTAAAAATGGAAAATTTGTTAAAGAGCAGTAAGATTCATTTCCATCATTATTAATGTTTTTTAAAGTTAACCACTGGAAATTTTAAAAAAATTATAGAGGCATACACACGTTTTTTTGATGATCTTATCATAGGAATTAAATATTTTAATATGAAATTAGATTTGTCAGCATCTGCATCTGTGTTGATGGAATGGTTCTCCAAACTTTCTAGCCTGGTGGGATGCAGGGAGAAAGCAGCCTGGGGATATAGACTGGTACAAATAACCCCATGCTGATGGACA…
TRINITY_DN11_c5_g1	GAGGAAATTGGAGTACCCAGTGGAAACCTATGCGGGGGGAAAACATGCAAACTCCACACAGGCAGTCACCCGAGGCCGGAATTGAATCTGGGTCCCTGCGGCTGTGAGGCTGTAGTGCTAACCACTGTGCCATGCCTGACGTGGTATGCAAGCTGTCCTATGGGTGAGATCACCTCCCACCTTTCCAGACACAGCCCTGAAATTAGGTCGGACCTAAGTGCACCCTCGATCACCACACACTGCAATGGGAATTTGATTTATGCGTAACGACTGTTCCATTACAGCTCACAGGGAAGGAGCAGGAATCAGGGAACCTGAGATGGATGAGCAAGAAATCTGGAGACTGATAGAGGACAAGTGACTTGGGGGGCCATGAGAGGTGAACAGCACTGAAGATCC…
TRINITY_DN11_c6_g1	ATCACATAGTGACAGGGTGTTAGGAAGGTCAGAGATATTTAGTCAGCATTTCTGTTTGAAACCTTCCCAAATGCCTATCCAATTTCCTTTGTAATAGTTTAGTGTTTCCACTTCCTCGACCCTCGTAGGCAGCGAGTTCCAGGTCATTACCATTCATTGCATCAAAATATTCTTCCTCACATCCTCCCGTATATCTCTGACCCAA
TRINITY_DN78_c1_g1	CTGCGCTGTAATGTTCTATGTTTTATGTTCCACCAACTACTGCTCTCTACACGAGATCCGCGGACACTGGCAGCGGTCCCCCCGTCTCGGACCCCCAGACGCCTGCGCTGTAATGTTCTATGTTTTATGTTCCACCAACTACTGCTCTCTACACGAGATCCGCGGACACTGGCAGCGGTCCCCCCGTCTCGGACCCCCAGACGCACGCCGACAGAGGTCCCCCCGTCTCGGACCCCCAGACGCACGCCGACAGAGGTCCCCCCGTCTCGGACCCCCAGTGGGGGTGGGGGGTGTTCTCTATACGCACGGTGGGGGGGGTGGGGGGTGTTCTCTACATTAGATAATACTCACTGCTTTAATCGGAAGTCCAGATAGTTGGTGATTGTCCTCAGATGCAGT…
TRINITY_DN78_c1_g3	GGTTCAAGAAGGCGGCTCACCACCACCTTCTCGGGGCAGTTAGGGATGGGCAATAAATGCTGGCCTGGTCAGTGACACTTGCCTCTTGTGGGGCGGGGGAAAGCCAGTACCATGACACCATTATTGAAACCCATCTGGTTCACCAACGTGGAGGCGAAGGCCTGGTGCTATTATCGCTGGACTATTAATCCGGAAAGTCAGCGAATGTTCTGGGGGACCCGGGTTTGAATCCTGCCATGGCTGATGGTAAAACTTGAAATAAGAATAACCGCGAAACCATCGTCAGAAAAACCCATCTGGTTCCCTTTAGGGAAGGAAATCTGCCGTCCTTACCCCGGTCTGGCCTACAGTGTGACTCCAGAGCCACAGCAATGCGGTTGACTCTCAACTTGTGACTCC…
TRINITY_DN78_c3_g1	GGGATGGGCAGTAAATGCTGGCCAGCCAATGATGTCCATGACCCAAAAATAAATTTTAAAAAATAGATCATCAGATTAGATACAGGGAGAAGAGATTTAAAATCAGCAACAGGGTCCTGAACTAAATTTAAAAGGAAAAGTTATCCTTTACTATTGAAGAAATGGAGTAATAAGTGATACAAATATTCTGATTGGAATGATAAAGGGTAGGAAATATTGTATTTGTGGCTGATGATATGTCAATGAGAAATTAGATGGGAAGAAAATATTGCAATTTTATCTATTCTGGGTGGAGTTATTGCGATTACATATGATACAAATTACAAATTAACATTTACGATGTCTTTTTAAACAAAAATCATCCTCTGGAGCAAGATGTGGACATTTATCTGAAGCCAT…
TRINITY_DN78_c3_g2	CCCATCATGGCAGATGGTGGAATTTTAATTCAATAAAAACATCTGGAATTAAGAATCTACTGATGACCATGAAACTATTGTTGATTGTCAAAAAAACCCTGGTTCACTAATGAGCTTTAGGGAAGGAAATCTGCCATCTGACTCCAGAGCTGCAGCAGTGTGCTTGACTCAACTGCCCCCTGAAATGGCCTGGCAAGGCATTCCTTCTCAAGGACAACTAGGGATGGGCAGTAAATGCCGG
TRINITY_DN78_c4_g1	ATAGAGTAGGGTAATGTGATAGTGTAGGGTATATGTGATAGTGTAGGGTATTTGTGATAGAGTAGGGTAATGTGATAGTGTAGGGTATATGTGATAGAGTAGGGTAATGTGATAGTACAGGATATCCGTGATAGTGTAGGGTAAATCATAGAATCCCTATAGTGCAGAAGGAGGCCAATTGGCCCATCAAGCCTGTACCGACAACAATCCCACCCAGGCCTATCCCTTTAACCCCATGTATTTACCCTGCTAGACCCCTTGACAAGGGGCAATTTATCATGGCCAAACCTCCTAACCCTCACTTCTTTGGACTATGGGACTGGAGTACCCAAAGGAAACCCATGAGGAGACACGGGGGAGAATGTGCAAACTCCACACAGACAGTGACCCTAGGCCAGA…
TRINITY_DN78_c4_g2	GTGCCGATTGATATCAGTTAGAGTGGAAGCAATGGCGAGATTATTAATCCAGAAACTCAGCTCACATCCTGGAGACCTGAGTTTGAAACCCACCATGGGAAATGGTGAAATTTGTTTTTTTTTTAATTTAAAAAATCTGGAATTAAGAATCTATTGATGACCATGAAACTATTGTCAATTGTCAGAAAAACCCATTTGGTTCACTAATGTTCTTTAGGGATGGAAATCTGCTGTCTTTACCTGGTCTGGCCTATGTATGAGTCCAGAGCCACAGCAATGTGGTTGATTCCCAACTTGCTTCAGGCAACTAGGGATGGGCAGTAAATGCTGGCCAACCAGCGATGCCCATGCCCCACAGATGAATTAAAAGATAACTTGTCAACAACACCTTCCACTACT…
TRINITY_DN78_c4_g4	GCTGTATCAATGGCTCAAGATGGCAGCTCACCACCACCTTCTCAAGGGCAACTAGGGATGGGCAATAAGCCAGCGCTGCCCATGCCCCATGAATGAATATATAAAAATAATCATAGACTGGTTACCTGCCAAATTATTTTGCCAATCGCTTTTCACATGTCAAGCCTTTCTATGATGATACAAATCCACCTTTTGGGCTTACTGACCATATAATTGTTGCGGCAAACTGATGGCATTAAGATCTCTCCAGTGTTGCTACGGGTAACATGCACTTCCCCATGCGTGTTGTTGGTTGCTGGAGATATGGCCAGTGATGGTGGAGGCCCCAGTGTTTTCTCCCATCGCTCTGCCACGTGTCTCCCTCGCTTGCTGCCCGCCATCGGCGCACGTTGGGAGGGT…
TRINITY_DN78_c4_g5	AACAAGGAATGGATTTGGGTTTACCTGGTCCACTCTGAGCATTGGCTTTGTAACGTCAAGAATGAAGTACAATTTTTTTTTAAATCAAACACCAGTCAATCACCTGGTTCTTAAAAAGGCGAGGACACATTTTCCTTGGGTTCAAACTTGACAATTAGCAAATTAATAAGAGTGAGGGCATGGAGCAAGCTTTGAATATTTCTACCTCCCTCTGCGCTATTGAACTTCTCATCTTTGAAATTTCCACTATTATAAATGGAACAGCGTTTTTGTTATTAATAGAATCCCTATAGTGCAGAAGGAGGCCATTCAGCCCATCAAGTCTGCATCAACTCTCCAATATAGCATCTTAGCCAGGCCCTAT
TRINITY_DN78_c4_g6	TACAGACTGTGACCCAAGCCAGGAATTAAGTTCGGGTCCCTGGCGCTGTGAGGCAGCGGTGCTAATTACTGTGCCACAGTGCCAGGGTTTGGCACTAAGCCACATAGAGATATTCGGACAGGTGGCCAAAGGGTTAGAGAGCTATGGTTTTACAATAACATCTCAGTTTTACAGAATGGTATAAAAGTACGTGAAGTTACGTGTTGCCACGTAATTGGCTGCATTTTGAGTCACAGAATGTGATGTGACAAAGGTGGCAAGCTCTGTGCCACCAGAAAGAAAATCTACTATTTATCACACCACAGAAACTTTGCTTTATTAATGCTGTAACATATTTGTATTGAAATTTCAGTACTATCCCTGTCACTGGCTGACAGTGAATGCATCAGCGTCCATTAT…
TRINITY_DN78_c5_g1	CAAACTATGTACGTAGAATCCTATCGAGCATCGAGCCTGCACTGACCACGGTCCTATCGAGCATCGGGCCTGCACTGACCACAATCCCACCCAGGCCCTATCCCCATTACCCACCTTGGCTAGTCCTCTAAGGGGCAATTTTGGCACGGCCCATCCACCCTAGCCTGCACTTCTTTGGACGGTGGGAAGAACGCACAGATAGTGACCTGAGCCGGAGTTGAACCCGGGTCCCTGGCGCCATGAGGCAGCACTGCCAACCACTGTGCCACCCTGTGCCCCATGTGACTCCAGGCCCCACAGCGACGCGGTTGACTCTCCAAAATGGCAGGTTGTTGGATATGGAACCTCGTAGGAGCAGAACAACACCCTAAGTGCATCACAGGGGCTGCCTCAAGGAGA…
TRINITY_DN78_c6_g1	GAAATAAATCTGCTGTTGTTACACAGTCTGACCAACATGTGACTCCAGAGCCACAGCAATGTGGTTTACTCTCAACTGCCCTCCAAAGGCATCTAGGGATGGGTAATAAATGCTGGGCAGCCAGCGACATCCATGTCCACTTGCCAACCAATCAACAACACCCTCTCATGCAATATAAATTGTTGCTTCCTTTGAAATTTTGCATTCTTGCATCTGTCCTGATAAGTGCAAGACAAAAAGCTTTAACAACTGCTTTTTTTTCCCAGCAGTACTCAAATTCTGTACTACCAAGTGACAATATTCTATTCCATAGCAATTCTATATGTCTTTATCTGATAATGGTGGCCATATAAGAAACCAGCGGTCTATTGTTGACTTTTATCCACACCTTTCGATTGC…
TRINITY_DN78_c6_g2	TCTTACATAAACTACATGTATTCTACATTCTTAGATGCTGCCAGACCTGCTGAATTTATCCAGCATTTTCCGTTTTTATTTTAGATTTGCTGAATCCACAATCTTTTGCATTTACATTATTCTGTATTCTTCACTGGAACCTGAAGGTTAGCTACGCATTTGTGAGTGTTGATTTAAAATGTAGTGATCAGCAGGTGAACCGAGCTTTCGAAAGGTCTGGAAACTAAGTACAGGCAGGGATTGAAACATATTCTCATTGCAGAGCCAGTGTGGAATGCTAGGCTTCATTCTCTTGAGCAATTTAAAAGTCTTAAAAACCCTGTGGAGGTGGTGCAATCTCCAAGACCTTTTCTGAATTTAAGAGCAATTTCAAGTGTCTTACACAGAGATGGACGAGTA…
TRINITY_DN78_c8_g4	AATTTTTCCTCCTCAGTCTTAAATTGGTGCCCCTTTATTCTGAGTCTCTGCCCTCTGGTCCTAGACTCTCCCATGAGGAGAAACATCATCATGGTGTTTACTCTAAGAATCCTATATCTTTCAATGAGATCACCTCATTCAATCCCTCCATACCTAGTGAACCTTCTCTTAACTGCCTCCAATGAAATATCTTTCTCACCCTTGTTTTCAAATTCTTCTGAAGGCTCATCCCATCTGAGTTCACCCAGACCCACAACTCCAAGATAACTGCACAGCCTGCAGGAATGTCCCAAATTGAATACCTCCTCCATGGCTGCCTGGGCTCTAAGTTGCAGAATTCCTCAAACTTCTTTAGCCTTTATATAAGTCATTATTTACAAAAATTCTTTATCGAGTTCT…
TRINITY_DN78_c10_g1	CAGACAGTGGCCCGAGCCAGGAATCAAACCCAGGTCCCTGGAGCCGAGGCAGCAGTGCTAACCACTGTGCCACATTGACAGTGTCGTTGTAAAATTTATGCATTGTGACCTAATTGGCTCAAAAATGGTCAAACGATCCCAATGGTCAGATAAATGACTTATCAATGATTCAGGAGCAATTTTGAAAAATGTCTGAAGAAAGTCAGTCATTCTGATCTGAGTAGCCAGCCCACTCTCAAACGGATAGAGCTTTACAAGGAACTGCACACTGGGAATCACCAAGAATGTGTAACCATTAATTGACTTCCCATATAGCTTTTGAGAAATTTGATTTGTGGCCTTAAAGGGGCAGACTAGGTTAAAAATGTCCCCACTTTGACAGAAAATAATGCATTGCGT…
TRINITY_DN78_c11_g1	TTCGAGAAACTGTAAGTCATGAAGTGATTTATTCTGAGTGGTGAGAATGTGGAACTCACTGCCCTGGCAAACCTGCATTCAAGAGGAAACTGGATTACCACACAAGTGAAGGAGGAATAGTTTTTGCTGATACAATTCGATGAAGTGGGGGGTGGGAGCTGGCTTGTATGGAGCATAGACACCAATGCATGCTTAATTTCTGTGCTGTAAATAAATTTTATATGGGTACAATTAATGAAAGTGGTGGAAATGAAAGAGGTTCAAATGCTATCTGGAACACAAACTCTCTGACTCACAGTTTGAGTAGAACCACCACTTGCAATACAAGGGAACAGCTTAACGTAAAAATAATTTGTTGACGAGGTTCTTATAGACGTTACTTAAGCTTTTCAGCATCGT…
TRINITY_DN78_c14_g1	TTGGTGATTGTCCTCAGATGCAGCGCCCAAAACTGCACACAGTACTCCAGCTGCGGCCTCACCAATGCCCTATACAGCTGCAGCAAGACCTCCCTACTATAAGGCAAAACTGCATGGAAACAGGCCCTTTGGCCCAATTGGTCCATGCTGACCATGGTGCCCTCTCAAATGGTCCCAATTGTCTTAGTTTGGCCGTTATCCTCTATATTCTCCATCCTTTTTTAGGCATCCTTCCACCTCATCTCTATCATCATTAGTCAAATCACCAATTTCTAGACCACTACCAAAGTTGGTTTGGAACAGGCTTCCAGGGAAGACAGGCCTGGGGAAATGCTCAGTGTCTGCTTGACCATGATTGGGATTTTGCCAGACAGAGTCCTAAATATGAGCAGCATCTTA…
TRINITY_DN78_c22_g1	AGAGAATCTGGTGAACTGGTGCAGCGACAATAATCTCTGTCTCAATGTCAACAAAATGAAGGAGATTGTCATCTGTTTCAGGAAGCGTAAAGGAGAACATCCCCTGTCTACATCGTAAGAAGTTTCACACCAGGTTCAAGTCCAACAGGTTTATTAACGCCACTAGCTTTTGGGGCTCTGCCCCTTCATCAGATGAATGGAGAGTTCTGATCACAAACAGAACATATAAAGGCACACACTCAGTTTACAGAATATTGATAAGAATGCGAGTTTTTACAACTAAGC
TRINITY_DN78_c35_g1	CTACATTTAAGATAAATTATCCCCCCACCCCCTTGTCTTCCCTCCTCTTCCCTCTTCTCCCTTTATTCTTTGACATCTCTTCTTCCCTGCCTCACCTTCTTTCCTCCCTGCTTCCCTGCCTCTCACTTCCCTGATGTACAGGAGACAGTATCTCACTAAGAACCAACAACTTTTAAGAAGGAGTAACAATTCAATGAAACATTCCTCTCAGAAATCTTGATTGGCTAAAATAGGCACTGAACCTATTTTTTGTGAAAGGAAAAGTCAGTTTTTGTTGAATGATGAGATGCCTTGGGTTTCTTAGAATCTTTGCAGAATAGAAGCGTGCTTTAGAACTCAGATCCTGATTCCCTTCTGCATCCCACTTCACCCCTAAGCCCATCTTAATACTCCTCACCC…
TRINITY_DN96_c0_g1	TTGGGAAGCAGTTGCTCGCGTTGTTCAGCACTCAGTCTGTGTGCCTTCCCTGCCATTGACAATTAATCTTCTGCACCAGCGGCTCCCGTGGGGTTGAATTGGAAATTTAGAACCTTGTTTCGGTAATTTAGAACGTTGCCCCGGGGATTTAGAACCTTGGCCCGGGAGTTTAGAACGTTGCCCCGGGGATTCAGAACCTTGGCCCGGGAGTTTAGAACGTTGCCCCGGGAGTTTAAAACGCCGCCCACTTGGTGCAACAGGCGTGATCTGACAACAGGTCTCTTGCAAACACAGTCACTAAAACCCAGGACCTGTGCTAGGTGGCAGCAGGG
TRINITY_DN96_c1_g1	CCACCCTCTGTGTAAAAAACCTTGCCTCGCACATCTCCTCTAAATTCTTGCTCCCACCCCCTCCCTGGGCAGCGGGTTCCAGATATTCACCACCCTCTGTGTGAAAGGCCTTGCCTCGCACATCTCCTCTGAGCTTTTCCCCACGCGGGCTTTTCCCCACGCACCTTAAACCTGTGTCCCCTGGTACTTGACTCTTCTATCCTAGGAAAGAAATCTGACTATCCACTCTGTCCATGTCACTCATAAACTAGTAAACCTGTATCAGGTCACCTCTCAACCTCCATCGTATCAGTGAGAACAAACCAAGTTTATCCAACCTCTCTTCATGGCTAATGCCCTCCAGACCAGGCAACATCTTAGCTAATACCCTCCAGACCAGGCAACATCTTAGTAAACCTC…
TRINITY_DN96_c1_g2	AGAAAGTGGCTCACCACCACCACCATCTTGAGGGCAATTAGGGATGGGCAATAAATACTGGCCTAGCCAGCGATGCCCACATCCTGTGAACAAATAAAAAGCAATCTTAAATGATTGCAGCTCCTAAATACAGGATCATGTAAAACTCAGCATTTTATATGCAATTAGAAAGTGAGATTAGATTCCTTGATTGAGATTTGCTATCTGTGATTATATATGATTTTCATTGTGATTTATTGTTAACCAGCAAACCTCTCATTTGAAATTATAAGTAATCACTTGGAATCCATTCTTTAGTTGCATCTATTTGACAGATTGATGCAAACCAGTTGTGAAGCTATGTCTCTGCAGATTCAAGTCGCTGGACTGTACGATTTAATTCTAGACCCACCTGTACTT…
TRINITY_DN75_c0_g1	CACCGGCCCAAATCTGCTGTTCTTACACTTTAGGAAAGGAAACCTGCTGTTCTTACGTGGTCTGGCCTACATGTGACTCCAGAGCCACAGCAATGTGGTTGACTCAACTGCCCTCCGGCAACTAGGGATGAGCTATAAATCCTGCCAGCGAACTTAACTGCCCTCCAAGAGCAATTAGGGATGGACAATAAATACTGGCCAGCCAGAGATGCCCATGTCCCATGAATGAATAAAAAAATTCACAAGGTTCATCTATCATAGCCATCCCTTTGGAAATCCAGGCTATTTAATTTTTTCTGCTCCATTTTTGAATAATTATTCCATCATCTTTCCTGCCATTGATGTTTAGCTAATATATTTCCTTGGCCTGTTCTTGCTCCTTTTTTTTTAAATAAATAT…
TRINITY_DN75_c1_g1	AGTGTGATGGAACACTCCCCACTTGCCTGGATGGGCCATCACTGAATCCCCCTCTGTCAACATCCTTGGGGTTACCATTGACCAGAAACTCACCAGACTCACCACATAAACATAGTGGCTACAAGAGCGAGTTAGAAGCTAGGAATATTGCGGTGAGTAACTCACCTCCTGACTCCCCAAAGCCTGTCCACCATCTACAAGGACACAAGTCAGGAGTGTGATGGGATACTCCCCCCACTTTGCCTGGATGGAAGCAATTCACCAAAGATCCTTAGGCAGCACCTTCCAAACCCATGACTGCTACCATCTAGAAGGACAAGGGCAGCAGACACATGGGAGCACCGCCACCTGCATCTTCCCCTCCGAGTTGCAGCTCCAACAACACTCAAGAAACTCAAC…
TRINITY_DN75_c1_g5	GAGCCACAGCAGTGTGGTTCACTTTTAAATGTCTTCTGAAATGGCCTAGCAAGTCACTCATTTGTATCAAATCACTAGAAAGACTATAAGGAATAAAATTGAACTTTCTATAGTACCAAACATTAACAGCAAGCGATAGTGTGATCATTCAACTCTATCAATGGATCAGATCTGAGCTCTGCAGTCCTGTCAGTAATATTCATACTGTACAAGTGCCACACAATGAGTGTCTCCATCATGAGAGAATCGAACCATTGCCCCTTTACATTCAATGACATTGCTATTCTGAATTCCCTAACTATCAACAGGTTGGGGATTACATTGACCAAACTGAAAGGAACCAGCCATATAAATACAATGGCTACAAGAGATGTCAGAGGCTGGGAATTTGCAGCCAGT…
TRINITY_DN75_c2_g1	TGCAGCTCCAACATCACTCACATGACACCAGCCAGGATAAAGCAGCCCACTTGATTGGCACCCCATCTACCACCTTAAACATTAACTCTCTCCACCACTAACACACATTGGTAGTAGTGTGTATTGTATAAAAGACACATTGCAGCATCTCACCAGGGCTCCTTCGACAACACCTTTCAAATCTTTGACCTATGTAATCTAGAAGCACAAGGGCAGCAGGCATATGGGGACACCACAACCTGCTAGTTTCCCTCCGAGTGATCCACTATGCTGATTGCAGATATATCACCTTCACTTTATTAGCATTGGTTAGAATCCTGGAACTTGTGTTGTAATAACACAGTAGGTGTACCTACACCAAGATGGAATGGAGCGTTTTAAGGTAGCTCACACAACCTT…
TRINITY_DN75_c6_g1	GGGCCGGTAGGATGGTCTTGGTGGGGGGGGGAAAGGGGGGCTGGATATTGGGCAGGGATCAGGGCTGACCCAGGAATGGTCATGGGATCCGCAGTCAGGCCGTGACTGATGAAGGGGGAAGAAGCACTGCGGGGGTCCTGGGCTAGCCAGCCGTTGAGCTGGCCAGCAAACAGGAGGCTGACAGTTCAGGGCCACTGTGTATGCGTAGAGTTCCAGACTCTATTAGACTCTGGCATGAATAGGCCCCACTCCCCAAGTTTTTAATGGTACTCTCAGTTGTGATTTCTGCATGTCAAACGTGTTTGTTTCCTGGGCTGTTTTTGTTCATTGCATTGCAAAATGTGTGGGAGATTCTTGTCTGAACTCCCACTGAAAAATCAATCAAGATTAACACTAGTT…
TRINITY_DN75_c8_g1	GGGTAAATATGAAGGGTTAGAGAAATAGGGTCTCGGTGGGATTGTGTTTGGTGCAGACTTGATGGGGCCAAATAGCCTCTGCACAGTAGAGATTCTATTCTATCCACATTCAGATCACTATTAACCATAAACTCCAGAGGACCTAGCACATAAATGCAGGTCTGAGGCTGAACATCCTGCAGTGAGTGGCTCACCACTTAATTACCCAAAATTTTTCCACCACTTAAGAGTTGTACAATTTTCCAGGATGCACTGCAACAACTTGTCAAATCTGCTTTAGCAGCACCTCCCAAACTCTCAGCTACCACCATAAAGAAAACAATAGCAGGTAGATGGAAACAGTATCACCTTCAATTTGTCCTTCAAACTCTCTCAATCCTGATTTGGGCATACTGTCAC…
TRINITY_DN75_c10_g1	GCAGGTCAGAGGCTAGGAATTCTGTGGTGAGTAATTCACCTCCTGACTCTCCAAAGCCTGTCCACAATCTACAAGGCACATGTCAGGTGTATAATGGAACACCCTCCACTTGCCTGGGTGAGTGCAGCTCTGACAACATTCAGGAGGATCCACACCATCTAGATTAAAGCAACTCCCTTGATCACTATCCCTTCCACAAACATTCTCTCCCTCCATCATTGATGAACAGTGGCACAATCCACAAGATGCACTGCAGGAATTTACCATAGTTCCTTAACATCGTCCAAACCTATGACACCACCTGGAAGTTCCCCTCCAAGTCATTCACCATCCAGCCTTGGAAATATATCACTATTCCTTCATTGTCTCTGGGACACAATCCTGGAATTCCCTAACAGCA
TRINITY_DN75_c11_g1	GGGCAGGAAATGCATAGGAACATCATCGCCTGCACGTTCCCCTCCAAGTCACTCACCATCTATACTCAGAGATTGATTACAATGTGAAATTCAGTGCCACAGGAACTAGCTGGACAACTCATTCTTATAGTTTAAAAACAAAACGTGATGAGTACATGAGGGAAAGGAAATTAGAAAGATGAGCTGAAAGGCTGAAATGAGGGAGATGGAATGGGAGTTGTCTTGTGTGAAATATTAAATCAGCACAGACTAGTGAAACCAAGCAGTCTCCTTCCAGACTGGATATTCTCTATAATTCAATATAATTTCTGATCAGCACGTTCCACTATTTGTACTGCACATGTTCAGAGTATAACCTGGTGCTGAGATTGTGTCATGTGTAAAATTATGAATTGTAAC…
TRINITY_DN75_c22_g1	TAACAAATGGCAGTAACATTTATGCCACACAAGTGCCAGGCAACATCTTGAGCTTTTAAGTTTAAGTATATTTTTGAGTGTCACAAGTAGGCTTACATTAACCCAGCCAGTTACCTACCCCCCCAATCAGTCTACTCTCAGTCATCAGTAAAGTGATGGAAGGGGTCATCGACAGTGCTAACAAGCAGCACCTGCTCAGCAATAACCTGCTCAGTGACGCTCAGTTTGGTTTTCACCAGGGTCACTCAGCTCCTGACCCCATTACAGCCTTGGTTCAAACATGTACAAATGAGCTGAATCACTGCCTTTGACAATATCCAGTATTGGACTGACAAGTGGAAAGTAACATTCGCGCCACACATGTGCCAGGCATTGACCATCTCCAGCAAGAGAGAATCT…
TRINITY_DN15_c0_g4	TCTCTCACAGGTTTCCTCCGGGTGCTCTGGTTTCCTCTGAAAGACATGCTGGTTAGGTGCATTGGCCGTGCTAAATTTTCCATCAGTGTGCCCAACCAGGTGCCAGAGTGTGGAGATTGGCGGATTTTCACAGTAACTTCATTGCAGTGTTAATGTGAGCCTATTTGTGTCACTAATAAATAAACATTACACTGTTTTAACTCGGCTCACTATGGATAGCTTGGGTTTAACTGTTGCCGTAATGCAGACCGGGAGATGTCTGATTTATTTAAATGTTCCCAGATTCCAAGACAATTGCCAATCGGTTGATCCGGCTGGGAATGATTGGAAGAGGTGTGCAGGAAGGGATGAGGGGATTAGCAGAAAATGGGAGACTCCACGGAACAATCTGGGGGAAAA…
TRINITY_DN15_c1_g1	GTTACAAATAGGCTTACATTGACATGGCAATGAAATTACTGTGAAAATCCCCTAGTCGCCACACTGTGGCCCCTGTTTTGGGGGAGAATTTAGCATGGCCATTGCATGTCTTTCTGGTTCCGTATGTCGTGGGTGCACACACAGACTATATGAAACAAATTCTACATCATAGTCTAAGAATAAGACTGAGGTGAGGAAGAACTTCTTCACTCAGAGAGCTGTGAACCTGTGGGATTCCCTACCACAGAAAGCTT
TRINITY_DN15_c4_g1	GCTAAAGATTCGGGGCCGAGGGGGTTGGTGTTTGCATATCTTGTTGACCTGAACACAGTCGTCCTGATGGTGCCAGTGTGAGAGCCACTTGCATGCAATCGGAATGATTCCACATGGCCATCGAAGACCGCAAGTTGAGAACGCATCCACTTACCCTTCGAGATAAGCGAGGGCCGATTTTTGGAGAGGGAATCGCTCAGGTTCTGAGGGGCTGAATACGCACCAAATGGTAAAATGTAAACGGGTGACCTAGGAAGAAGCTGTGTAAATATACTGTTGTTCTTGATTACTTGTGTGCTGTTTACATTAAATGAACAGATAAGTTGATATAATTCTATTCCAAGCATGGACTAAAACCGTTCGTGAGAGCTTCCTACAGTTGTGCTGACTGTAACACGA…
TRINITY_DN2_c2_g1	CATTAACTCTGTTTCTCTCTCCATAGATACTGCCAGACCTGCTGAATTTATCCAGCATTTTAGTTGACAATGTTCCAAAGAGTTTTAAGCTACAAAGAATAAACTGAAGTTTTGAAAATCTGCCGTACTTGGAAAACCACCTTGCAAGTCAAAACTGTCGTCATTTTATTGAATGCACATTTGCCTTAAGACCATAAGAAATAGGAACAGGAGTAGACCATTTGGCCCCTCGAACGTGCTGCTGTGTTCTTGTCTCCTCTGCCACACTGATCATATTCCATCACTTGGCCTTTTTGGTTTCTGATGTTAAAAGATCAAAACCACTCGAGTCGAAGTTGTAGTAACAGGAATTTATTCACAAGTATGCTTGGGGAGACAACCTACAGCACAGTGACAATG…
TRINITY_DN2_c2_g3	CAAAGATGTGCGCGTTAGGTTGATTTGGCCATGCTAAAATTGCCCATTAGTGTCCTGGGATGTGTAGGTTAGAGGGATTAGTGGGTATAATATATAGGGATATGGGGGTAGGGCCTGGGTGTAAATGTATTCGGTTAGCACTGCTGCCTCACAGGGACCCGGCTCCCACTCCCCGTCTCTGCGCAGAGGGCTGGCTGCTGTCTGTGTAAACACCCACGCCCGGCCAGAGGAGGAAAAAAAAGCCCCTCCTTCTGATCGAGGGCTGATGTAATGTGTGTACCCTGCAGTAAACAAGTTGAGAGAGCCAGGCACAGCTCACACAGTCAGTGCACGGAGGACAGACAGAGACAGACACAGACACAGACACATTCCTGGTGTGTAATAGAACCCCGGGGGAAG…
TRINITY_DN2_c5_g1	TTCCCAGAGTCCTCGGGCTTTCGACTCTCAGCTCACCCTCCCCAACACCCCCCCCCCCCCCCCCCACCTCGGTGCTCCATTCCCGAGGGTGGGGGGGTCAGTAATCTTCCATGTTCCACTCTCTTCCGCTCCCACCCCTCTCCTTCCCGCTTTCCCTCTCCTGGTTACCACACTTACTCATACCTGGCTTTGAGTTGATGAGGGCAGGATGCGGTTGTGACTAGGCCGACAGTCACTTTGAACATTGGGGAAATCGTTGAGAGAGATTTCTGTTACCAAGTTACCACTATCCCTTTAATACTATGGGTGGCATAGCGGTTAGCGCTGCTGCCTCATTGCGCCAGGACCCCGGGTTTGATTCCCGGCTCGGGTCACTGTCCGTGTGTGCCTGGGTTTCCT…
TRINITY_DN2_c6_g1	TCAGGGGTTATGGAGAAATGCAGGAGAATGGGGATGGGAAAATATCAGTCATGATTGAATGGCGAAGCAGACTTGATGGGCCGAGTGGCCTAATTCTGCTCCTATATCTTATAGTCTTGTAAAAACTCTGACAAAGGAAGGGCAAAATGTTCTTCCTTTTGACAGAGGGTCATTTGGACTTGAGGCGTCAGCTCTTTTCTCCCCTTACAGATGCTGTAGTCTCGCTGAGATTTTCCAGTGTTTTCTCTTTTGGCTGGGAGACATCTGCTGCAAGATTGTCAACTGCAATTGGTTAAGGTGACCAAAAAAATGAAGGCCAGCCCTCAATGATTCCTTACTGTGTAATAACCAATGGGCAGTTCTTTTTACATATTTCGGTGGGGTGATGGAGTTGGAGAC…
TRINITY_DN2_c7_g1	AAACTTATACAGTGGACAAATAACTTTGAGTAGACATCTTGTTAGTACAACCAATATTTATTAAAACCCACACAATCAATAGTTACCCACCCGACCGTTTATTTGAACCCACACAATCAATAATCACCAACCCGACCAACAATAAGTTATCTTACAGAAAATACTAGAATTCAAGTCCAATACAAGACCTTGAGTTAACTTTGCGTGACTGGCAAATACCCAAGCAGATAATGGCCTTTATCTGGTCTCATAGCCTGGTCCGGCACTCTGGCTCTGGTTTCCCTCCTTTCCTTCTCGGGTGTAATGGCTATTCTCGTGCTGGTCATCGCTGGCGATGTTCACTATTGTTGTAGCTCATTCGTGGGGTCAAAGAGAGAGATTCCTGGTTGCGCAGCACCC…
TRINITY_DN2_c8_g1	CACAAACAGAGCGGCCATGATCTTATTGAATGATGAAGCAGGCTTGAGGGGCTGAATGGCCTACTTGTGTCATGAGTTGCCTCCCCAGCGGCGCCCTGCTAAGAAACTATGGAGAAAATGCCATTCTGCACCTGCCTCGCAGATGAAGGGACTGAAGTCTGTTTTAGGTGCCCACCTTCAAACAGAGGGACCCTAACCCATGTGACATGCACGTGCAGTTTCCAACACACAATGAGCATGTTGACTGTACCTTGAATCCTTGGATATCCATTTGATACAATCCAATTCCGAGGTCATTGAATCACTTGCGAGTGACCAGCCTGTGATATTTGTGAACTAGTTACAACAGCAGCACAGTGCCTCGTGAGATAACTCTTGGATTATATTTGGTTTACTGTT…
TRINITY_DN2_c11_g1	CACTAACGACGCAATGTACTAGGCCACTCTCGAAACATCCAAGAGCAGCCCACGCACGACCTACCGTGTGTATGCCCCTTGTTAGACAACAAGGTGGACCTGCGGAGTAAAAGAGAATGTAGACAAAAGTCGTAGGTAGAGGGAGAATTGGAATGAGGCGCTCACTGAGTGTTAAAATGGGCAGCACGGGCTTGTGGGGACTGTTTCCTGTGCTGTGTTGTTCTTTATGGGGAAAAGGCAGGGGAATGGGGATGAGGAAAATATCAGCA
TRINITY_DN2_c14_g1	GTTTGAGTTATAAGAAGCTGGATACAGTGACTTTTTTTCGAGCATAGAAGGCTGAGGGGTGATCTTATAAGGGTCTACAAAAAAATGAGGGGCATGGATCAGCTAGATAGTTAATATCTTTTTCCAAAAGTAAATCAGAGATCATAGAACCCTACAGTGCAGAAGGAGGCCCTTCGGCCCATTGAGGCTGCACCAACCACAATCCCACCCAGGCTCTATCCCTGTCACCCCACATATTTACCCTGCTAGTCTCCCTAACCTATGCATCCC
TRINITY_DN2_c15_g1	CAATGCTAACCATCGTGCCACCCCAGTTGTTTGATTCATTTTTCATAAGAAACCTGCACATCTTTTGACACTAAGAAATTGCCCCTTAGTGTCCTGGGATGTGCGGGTTAGAGGGATTAGTGGGTAAAATATGTAGGGATATGGGGGTAGGGCCTGGTTGGGATTGTGTTCGGTGCAGACTCGATGGGCTGAAGGGCCCCTTCTGCACTGTAGGGTTCTGTGATTCTACGTCACAATCTGCAAATTAATTGACTTGAGTGAAGAGTCCTCAAAATGGTTTAAGAGGGAAATTAGGAGGTTTGGAATAGGACACCCTAGTTGGGATGTACTGGAGATGATTTGTTGTAGTCTGAAAATAATTGGCAATGTATTGAGCAGCAGACAACGTGGCTAGAAACA…
TRINITY_DN2_c17_g1	TAATCCCACAAATTTACCCTGCTAATCTCCTGATACTAAGGGGCAAGTATTTACATAGAATCCCTACAGTGCAGAAGGGGGCCATTCGGCTCATCGAGTCTGCACCGACCACAATCCCACACAGGCCCTATTCCCACAACTCCACATATATACCCTGCTAGTCCCCCTAACACCAGGGTCAATTTAGCATGGCCAAACAACCTAAACCGCACATCTCTGGATTGTGGGAGGAAACTGGAGCACCCTGAGGATGACATGGGGACACAGAACCATAGAAAATTACCGCTCAGAAACAGGCCTTTTGGCCCTTCTTGTCTGTGCTGAACCATTTTTTTGCCTAGTCCCACTGACCTGCACTTGGACCATATAGAGGAAACCTATGCAGACACAGGGAGCACG…
TRINITY_DN2_c17_g2	CCTCACCACCCTCTGGGTAAAGAGGCAGGTACACTTTTGTCTTTTAAAAAGCATTTAGACAGTTACATGGGTAAGATGGGTATAGAAGGATATGGGCCAAATGCAGGCAATTGGGATTAGCTTAGGGGGTTTAAAAAAAAAGGTGGTATGGACAAATTGGGCCGAAGGACCTGTTTCCACACAGTAAACCCGAGTGTGGCGACTAGGGGATTCTCACAGTAACTTCACTGCAGTATTAATGTAAGCCTACTTATGACACTAAGGGAATTTCACAGTAAC
TRINITY_DN2_c19_g1	GCCCCGCCATTCGGTGGGATCGTGGCTGATCTGTCGTGTCTCGGTTCCGGGCCTGCCCCGCCATTCAGTGGGGTCGTGGCTGGTCTGTCGTGGCTCGGCTCCACCTTCCCGCCCTCTCCCCATGGCCCTTGGTCCCCTCTCTTGTCGAGAACCCATCAACCCGCTTCTTGAAAATAGGGGCCCATCAACCCGTTTCTTAGGGATGTTTGGCGGGGCGGCCTCCAACCCGTCAGCCCGCTTCTTGGAGGTGTTTGGCGGGGCGGCCTCCGCCACTTCGGCGGGCGGGGGGTTCCGGAGATTCACCGCCCTTTGGGTGGGGGGGTTCCTCCTCGGCTCCGTTCTGGACCGCCCCCCCTTTGCCTTGGGGCTGTGCCCCCTGGTCCTGCTGTCTTTTTTGAG…
TRINITY_DN2_c30_g1	TCCTAATTCTCTCCTAATAGCCTGATAATTACCCTTCCCCTGCTGTCTCTAACTGGCCCTAATCTACCTTTTGTTCTTAACATAGCGATAGAATTCTTGCCCTGACCAACCTTCTATTCTTGACATACCTATAGAACGCCTTAGGATTCTCCTTAATCCTATCAGCCAAAGTCATCTCATGTCCTCTTTTAGCCCTTCTTAACTCCCTCTTCAACTCCCTCCTAGCCAATCTAAAACTTTCTAGTGCACTACCTGAGCCCTCAAGTCTCATCCGAACATAAGCCTCCTTTTTCTTCCTAACCAACAAATCAACTTTTTTAGTGCACCACGGTTCCCTAGCCCTACCAAATCCTCCTTGCCTGACAGGGACATACCTATCACAGACCCGCAATAGCTGCT…
TRINITY_DN2_c31_g1	GAAGAAGTTCCTCCTCAACTCCGAAATGGCTGGAATTTTACTATCCTGCCTGCCAAGGGAATTAGAGTGGGTGAGGGGTGGACCATGGAAAGGTCTATCTCCTATCCCCTCATTAAATTGCCTTCTCTATCCAATCCTACTGTCAAAGCCCTTAACATTGTCCCTGATGGGAAAAGTTTCATCTCAGCCAGTTTATCCTTCTGTATACTAAATATTATATAGCTATACAGTTATGTTATGTGAATACATTTTGCTAACTTCCATTGTACTGTGTGCAGGTCTGGTCACTATTATAGAAAGAATATAATTAAACTAGAAACAGTGCAAATAAGATTTATTAGGATGCTACCAGAACTTGATGGTTTGCATTATAAGGAGAGGCTGGATAGACTGGGATTT…
TRINITY_DN2_c34_g1	GTTCGATACCCAGCTCAGGTCACTATCTGCACATTCTCCCCGTGTTTGTGTGGGTTTCCTCCGGGTACTCCAGTTTCCTCCCAAAAGTTGTGTGAATTAGGTGCTAATTTGCGCTTTTAGGGGGACGGGCTAGGGTAAATTACGGGAATAGGGCCTGGGTGGGATTCTGGTCAGTGCAGACTCAATGGGCCAAATGTCCTCCCTTTGCACTGTAGAGATTCTCTCTC
TRINITY_DN2_c35_g1	TGCACCCGAACTGGCACTGGAGCGTGACAATGTGGGGATTTTCACAGTAACTTCATTGCAGTATTAATTAAGTCTATTTGTGACGCTAATAAATAAAATTTAAACCAACATAGTGGTCTAAAAAGACCCAGAGCCAGGGTGAGTTTAGAGATGGACAGAAATGTGTGAAGAGCTAGGGTGGTGTCAGCTCCATTCCTGTACCTTCTACTATATATCGTGAGGATTTTTAATAAAAATTTGCTATTAATATACTCAAGATTGAAGGGGCATGCAAGAGAGTCCTTCTGGAGTTTTAGGTTCATACTCCAGATGAACAGGAATAAGTAACTCAATATCAAGCAATGTATGAAAATAACAAATGAGGCAATTATTGAACAACAAATAAAAAAATGAAAGAGA…
TRINITY_DN2_c47_g3	CTAGTGCAGAAGTAGCCATTCAGCCCATCGAGCCTGCACTGACTCTCCAACAGAACATCTCACCCCACCCCACTTTCCCCCACCTATCCCTGTAACCTCCCTGTGCATTTACCATGGCTAATCCATCAAATCTACATCCTTGGACACTAAGGGGCCATTTAGCATGTCCAGTCCACCTGACTTGCACATCTTTGGACTGTGGGGGC
TRINITY_DN2_c48_g1	GGGGCGGTGGGGTGTGGGGGGGGGGGGGTGGGGGCCGGGGATCGAACCCGCGTGTCTGGCAGTGTGAGGCAGGAGTGTTAACCACTGTGCCACCGTGCCACAACGTACATTGCAGTGAGGAGGAAAGGTAAGACCAACAAATTCAAAACTCCCTGGGTGATGAAACTGACAGAGTAAGACAGAGTAAATTACAAATGTACTCAGGTAGTCAGTACAAGTGAGAAAGAGGCTGACTAGAAAGTTCAAAGGAGGAGGTGAAAGAAAATGAAAAGCATGTGAGGGTTTGAAGACACTGGCAGCTAATGTCAAAGTAATGCAAAAGTCTTCTATAACCATATATAAGGGTGGTAAAAAGAACAGTGCATCTGATTGGGGACCAAAAGAAGCACATGGCTCATG…
TRINITY_DN2_c54_g1	TTCAATAAGATCATGGCTGATCTTATGAGGTCTATAAAATAATAAGGGGCACAGATCAGCTATATAGTCAATATCTTTTCCCAAAAGTAGGGGAGTCTAAAACTAGAAGGCATAGGTTTAAGGTGAGAGGAGATAGATACAAAAGTGTCCAGAGGGACAATTCTTTCACACAGAGGATGGTGAGTGTCTGGAACAAACTGCCAGAGATAGTAGTAGAGGAGGTACAATTTTGTCTTTTAAAAAACACTTCGATAAGTTACATGGATAAGATGGGTATAGAGGGATATGGGCCAAATGCAGGC
TRINITY_DN2_c59_g1	CTCCCACAGTCCGAATGTGCTGGTTAGGCGCATTGGCCTTGCTAGATTCTCCATCAGTGGACCCAAACAGGCGCCAGACTGTGGCGACGAGAGGATTTTCACAGTAACTTCATCGCAGTGTTAATGTAAGCATACTCGTCACATGAACAAATGAACTTAATTAAAGACATGAACAAATTAACCTAATAATAACCCTCATCGCGAGATTAAGCGATAGTATTATCATTGAATGTTGAGAGGTGATTACGATTAATTTAAACACCCTCCAGCAATTCCAGTGTTAGGGGACGGTTTGGCGTGGTCGGTCCGCCCTGGCCTGCACGTCTTTGGGACACTGGGGGACGGTTTAGCGTGGCCGGTCCACCCTGAGGGACAATTTAGCATGGCCAATCCACCCTA…
TRINITY_DN52_c0_g2	TGAGGCAATAAAAGGGTCGTGGCGCGTTTGTTCTCCAGTCCTAAATCTCACTTTACCATGGAGGTGATTTACACTACAAGCGCTATGCATTTCAGGGGGAGTTGCGAATTGAGCCAGCGAGCTAGCTTAGAGCGGCAAACTGTGAGACTCCCCAGCCGCAAGTCTAAAGTGCCCCAGGTCTTCACTTTCGAGCCTATCCTGCAAAGTGAGAAACCCAAAAGGCGCAAGAAACGACCCTATCCTGCAAAGTGTGAAACTCAAAAGGCGCAAGAGACGGTCTCTGAAAATTCTCTATCCAGCTCATCAGGTAAATATCTCCAGCCTTTCATGGACAATCTTTAACTCGATTTCCAATACTGTAATGTTACAATTTTTTTGTACTCTTTGCTATAAAAGAGT…
TRINITY_DN18_c1_g2	GGTTGGAGTCTCCTGGGCTCTTGCTGTGCTGCCTAATTTCCCCCCACCCCCCACCCCCCTGACCTTTTGAATGGGGCAGTTCCCAGGCCGTGAGCCCTCGTTTCCTCCCCCACCCCATGGCCCCCCCACTACGCTTCTGCACCGTGCGACGCTTGGGTGTCACGAGTGAGGTTTTGGAGGGGATTCGAACCCCGATCCTGCTCTCTGTCTGTCTGTCTGTCTCTCGTCTGGATTTCCTCCTGTTCTTTCCTCCTTCTCTCCTGTGCGGGATCCGAGGGGCAGGGCGAGAAGGCTGGGGGAAGGCCGGAGGGAGGGGGAGGGAAGGCCGGAG
TRINITY_DN47_c0_g2	TCTTGCATGGGGGACCTTATCAACAGATTTATAATCTATGTTGTTAGAACTATTCTGAGGAAGCCTTTACTTTATAATTTTCTTTCTCACTTCTTACATACGATGAATTGCTTTTGCTTCAAGAAATTGTTAATGCAGCAAATTGTCTGTAAGAGATTGGCCATCTGGACAGCACTTTGCTGAAGCTCTTCATTATTCAATCCAAAAACAATAGGTCAAAACTCTACTCCCTTGCCTGCCTGATTCCAGGGTGGATGAAGTTCCCAGAACAGAAATCTCTATTGGCCTTGGGTGAGAGTTTATGATATCAGCAGAGCCAGGCCATTAAAATCACACCCAACGTGTCCCAGTCAAAGGTTCAGATGTGGAAATGAAACATGATTGATTGTAATTTTCTAT…
TRINITY_DN47_c1_g1	TAAATGTGATGGTTTGCGGGGATAGGGCCTGGTGGGATTGTTGTCGGTGCAGATGTGATAGGCCGAATGGCCTCCTGCATTGTAGAGACTCTATGATATTAAGCGATCCTATGGAACCATTGTCAACAGTCCTAAAAATGCATCTGATCCACTAGTGCCCTTAGGGAAGGAAATCTGTGGCCTTTACTTGGTCTGGCCTACATGTGACTTCCAATCCATAGCAATGTGGTTGGCTCTCAACTGCCCTCAGCCAATCATTGGTCAGCCAGTGATGCCCATGTCCCACAAATGAATAAAAAAAGGTCCAGATTTTGTGCAAGAAACCTCCCCACTGATTAAAGTTTCAGTTAGTTGCAACCCGTGAAGTTCCCTAATCTCTTGTCATCCCTCTTTATGCTA…
TRINITY_DN47_c2_g1	GGGAAAAAATATTGACTATCTAGCTGATCTATACCCCTTATTATTTTATAGACCTCTATAAGATCAGCCCAAAGCCTCATGCGCTCCACGAAAAAGACTTCCAGCCTCTCCTTCTAACTCAAACCATCAAGTCCCGGTAGTAGTATGTATCCGAATTGATTCTATTAGCCATCATTAAATGTGAATTTCATGCCAAGAGAGAGAAATCTTTTTTCTGAACATTTAACTCAGGGCATTTAAATATTTAGAAAATTACATGGGTGGCACAGTGGTTGGCAGCACTGCTGCTTAGCAGCGCCAACTGCTGCTTAACAGTGCCGGCTGCTGCTTAGCAGCGCCGGGGACTGGATTTGATTCGGGACTGGATTTGATTCCCAGCTTGGGTCAGTGCCTAGGC
TRINITY_DN47_c4_g2	GGGAGGATCTTATAGAAATATATGAGATTATGAAGGGAATGGATAAGATAGAAGCAGGGAGGTTGTTTCCACTGGTGGGTGAAACTAGAACCAGGGGGGCATGACCTCAAAATAAGGGGGAGCAGATTTGGAACACTACAGCACAAATAGGCCCTTCGGCCCACAAGTTGCACGATCACTTCCATACCTACATTTAGGACGGAGTTGAGGA
TRINITY_DN47_c6_g1	CGTGCAGTCTGCCCGTGTTCTCCCCGTGCCTGTGTGGGTTTCCTCCGTGTGCTCCGGTTTCCTCCCACAGTCCAAAAGGCGTGCTGGTTAGGTGCGTTGGCCACGCTGAATTCTCCCTCCGTGTACCCGAACAGGCACCAGAGTGCAATGACTAGGGGATTCTCGCAGTAGAGCATAGAGGTTTACAGCATGGAAACAGGCCCTTCGGCCCAACTTGTCCATGCCACCCTCTTTTGCA
TRINITY_DN47_c7_g1	CAACCTATCCTCATAAGGCATGCTCCCCAATCCAGGCAACATCCTTGTAAATCTCTTCTGCACCCTTTCTATGGCTTCCAAATCCTTCCTGTAAGGTGACCAGAACTGAGCACAGTACTCTAAGTGGGGTCTGACCAGGGTCTATATAGCTGCAACATTATCTCTCGACGCCTAAACACAATTCCTCAATTGATAAATGCCAGTATACCATACGCTGCCTTATCCACAGCTTCAACTTGCACAACTGCTTTGAGCATCCTATGAACTCTGACCCCAAGATCCTTCTGACCTTCCATGCTGCCAAGAGTCCTACCATTAATATTATATTCTGCCATCCTGTTTGACTTGCCAAAATGAACTACTTCACACTTATCTGGGTTGAAGGCCATCTGCCACTTC…
TRINITY_DN47_c12_g1	CTTAAACCTATGTGCTCTAGTTTTAGACTCTGCTACCTTTGGGAAAAGATGTTGACTACCTAGCTGATCTATGCTCATTTTATAGACCTCTATAAGATCACCCCTCAGCCTCCTATGCTCCAGAGGAAAATAATCCCAGTCTATCCAGCCTCTCCTTATAACTCAAACCTTACAACTAATACCGTAGAAACATTGTAATGTAGTGTTAAAAGGCATAACAACAATGTGGGCAACCTGTGACCCAAGGGCACCTGCAGCCTAAAGATATTTTGTTGATCATGGGCAAGGTTTCCACGTTCCGTTGACTCCTGTCTGCCTAGTTTCTTTCCTACTGCTCAAACCATTAAGTCCCAAAAACTTCCTAGTAAATCTCTTCTGCGCCCTTTCTGTTTAATAATC…
TRINITY_DN47_c14_g1	GTTAGATGAATTGGCTATGCTAAATTGCCCTTTGCGTAAATGCATGGGGTTATGGGGATAGGGCCTTGGTGAGATTGTGGTCGGCGCAGGCTCCTTCTGAACTGTAAGATTCTATGATTCTAAGAAAAGGCTGGAAGCCACTCAAAGTGCCTCGGGAATTCAAAAGAATTCGGAAATAAAATACACCTTATCAGACATTCTGAAATGAAAATGAGTGTGGATTTATACAGTAAGGCTCTCTGCCAGATCAGATACGCTGCAGTGGATGACCTCATATCCCCAACAATCTGGTAAAATAAAAAGGTTTAAAGGGGATTGTGTTCAGAATTACAACCCGTTATAAAAATCTATCTTTTTTCCCCCATTCGGAAAATGATCTGTTTTATTTATTATACATTG…
TRINITY_DN47_c15_g1	CAAATGGATTATTACTTAAATGGTAAAAAAATTATAACATGCTGCTGTGCAGAGGGACCTGGGTGTCCTTGTGCAGAAATCTCAAGGAGCTGGTTTGCACGTGCAGTAGGTAATTAAGAAGGCAAATGGAATTTTGTCCTTAATTGCTAGAGGGATGGAGTTTAAAAACAGCGAGATTATGTTGCAGCTGTATAAGATGCTGGTGAGGTCACACCTGGAGTACTGTGTACAGTTTTGGTCTCCTTACTTGAGAAAGGATATACTGGCACTGGAGGGGGTACAGAGGAGATTCATGAGGTTCATTCCAGGATTGAGAGAGTTGGCTTATGAGGAGAGAATGTGGCAGAGGAGATTCACTAGTTTGATTCCAGAGTTGAGGGAGTTGGCTCAAGAGAGACT…
TRINITY_DN47_c15_g2	GGGATATAGATCCCTTAAGTGAGTGGGCGAGGGTCTGGCAGATGGAGTACAACATTGGTAAATGTGAGATCATCCATTTTGATAGGAATAACAGCAAACTGTTACTTAACTGGTAAAAAATTGCAGTATGCTGTTGTGCAGAGGGACCTGGGTGTCCTTGTGCAGAGGGACCTGGGTGTCCTGGGTGGTTTGCATGATCGGGAAG
TRINITY_DN47_c18_g1	GTGTTGGGACCACAATTGTTTACGATTTACAGAGATGATTTGGAGTTGGGGACCAAGTGTAGTGTGTCCAAATTCACAGATGACACTAAGATGAGTGGCAGAGCAAAGTGTGCAGAGGGATGTAGACAGTCTAAGTGAGTGGGTGAGGGTCTGGCAGATGGAGTACAATGTTGCTAAATATGAGGTCATCCATTTTGGTAG
TRINITY_DN47_c28_g1	ACCTATCCTCATAAGGCATGCTCCTCAATCCAGACAACATCCTTGTAAATCTCCTCTGTACCCTCTCAATAGCTTCTACATCTTTCCTATAGTGAGGCGACCAGAACTGCGCACAATACTCTAAATGAGGCCTGACAAGGGTCTTATAAAGTTGCAGCATTACCTCCCGATTCCTAAACTCAATCCCTTGATTAATGAAGGCCAGTACACCATACACCTCCTTAACAACATCCTCTACCGGTGAAGCTAATTTGAGAGTCCT
TRINITY_DN47_c32_g1	CGGTACTGTGGGTCAACCCATGGCATATGGACTGCAGCGATTCAAGAAGGCAGCTCACCACCACCTTCTGAAGGGGCAGCTAGGGGTGGGCAATAAATGCTGGCCTAGCCAGCGACACCCATGTCCCAGGAATGAATAAAGTGCAAAAAATAGTTTCGTCCGTGGTGAATTACATGTTTTCAAAAATATACTTGCAAAGGTGTCAAGACGTAAATTACGAACCAAATTAGTATCTTCCAATGCTGTGGGTGGGATTATCCGGCTGAATTTGCCCCAAACCTGTCCAAGGTCCCGCAATGATTCCCGCAATGTGTGTATCTCACTCCATTTGCAATTGCACTGAATAGTTACAAGGTCTGTCGACCACGCCTGACCTTCCAGTGCAGAGTTATCCCACAC…
TRINITY_DN37_c0_g2	TGTGTGGGGTGTGCACGTTCTCCCCGTTATCCACATGGATTTCCTCCGGGTGCTCCAGTTTCCTCCCACTGTCCAAAAGACGTGTTGGTTAGGCCGTGCTAGATTCTCCCTCAGTGTTACCCGAACAGGCGCCGGAGGGTGGCGACTAGGGGATTTTCACAGTAACTTCATTGCAGTGTTAATGTATGTTTATTGTGATACTAATAATAAACTTTTAAAAGTTCTGACATTCTTGAGGAAGAATAATGTCAGGCTCTATAATTCAATTTATGTAACTTAACTCCCTCATCACAGGAATCCTTTTTGTAAATCTTTTCTGCACTCTCTCCGAAACATTTCATTCTTCCTAAAGTGTGGTGTTCAGACTTATACATAATATTGCAGCTGAAATCAAGTTGA…
TRINITY_DN37_c1_g1	AGTGTAACTTGCTACTGTGACACTATTGTGACTTGAAGAAATGTATTTTTTAATCATGTTCTCTGCAGTTATAAGTAGCTTCATTTTAATTTTAATTGTGGCACTGATTTGAGGTCCTTTTATTGCTGCTTAAATGGTTTAAATGGGGTTGTGTTTATTTTCACTCGGGGCTAATTCACTTTTTGGGAGTCTATAACCTTTTGAATTGTTGTGGGAAGAATAGTTGACAGGTCAGGAGGGACAGATGTTTTTCTCTACCATGAATTTGTTCATGTTCAATTCTGGATGCTGGCTAGTTAGAAGGTGTTTGGACTTCAGGCTGGATGCAGTGTTCTGTCCTTCTCTCCCTCGTGTTTTGAGAAGCTGATCTGACTTAAAGCTTGTCTGGGTATGCTGTAG…
TRINITY_DN37_c1_g2	ATCTATCTATCTATCTATCTATCTGTCTATCTATCTACCTATGCCCTATATTTTCCTGAAATCTTCCATCACCAGTGAATTTATAGTTCTCCATTCAAGTTAATCAGAAGACCTTACATAAAATAAAAGTAGTTTACTGTTTCGGTGGCCCAGCAGTCACACAGAGGTTAGCCATATCTGACAACATTCCAATGGTACATGTTACGCTACTGTGCCTTTAAGAAGTGCATTTTTAATCATGTTCTCTGCAGTTTGTAAGGAAGTCAGCTTTTTTAAAATTTAGTAACTGGCACTGTGAAGTCTGTAGTGGCATCTTTTATTGTTGCCAGAGCCACAAGCTAAACATAAACCGGGGGTGTATGTTTGTAAGAATATTGTGTTGGAACAGTATTCGTAGCT…
TRINITY_DN37_c2_g1	CGTCTGCATGGGTTTCCTCCCATGATGTGCATGTTAGGTGGATTGGCCGTGCTAAATTGCCCCTTAGTGTCAGGGGAATTAGCTAGGGTAAATACATGGGGGTAGAGCCTAGGTGGGATTATGGTTGGTGCAGACTGGATGGGCTGAATGGCCTCCTGCACTATAGGGATTCTATGATCATTAATGATCTAATGTATCATCAC
TRINITY_DN37_c2_g2	GGGATGGGGCCTGGGTAGGATGCTCTGTTAGAGAGTCAGTGCAGACTTGATGGGCTGAATGGCCTCCTGCACGATGGATTTGATGAGAGCTGGATGGGCAGGAGATGACCCACAGTCTGGTGCCATTTGTAGCAGTTTCACCTGCAAGGACCTGTGGACTAGGATCAGAAAAACAGTCAACCTGCAGAGATGATGCTTGAAGCCAGGGCAAAGATATTTGCACAGTCTTCCCCATCACTACAAAGATGGGCAGGCTCTTGATTGTGGAAGTAAATCTGTCCTTACGGTTCTTATCACACTAACCTGTAGGAAGGATACTATATTTTAAAATTTCTTCTAGTTCCAACCTATCCATAAACTAAGAGGCTAACTGAAGAGAATCCCAGCCTGATGTTTAGC…
TRINITY_DN37_c3_g1	GTCGCTACACTCCAGCGCCAGTTCGGGCACACCGAGGGAAAATTCAGTGCGGCCAATGCACCCTAACCAGCACGTCTTTTGGAGGAAACCCAATTACTTTAACCCGGGACAGCAAAACGTTTTAAAGTCTGTTAAATTCTAATTCTGTTTTTGATTGCAATTTATTATGGTGACAGCTGCATGCTATAATTTAGTTTGTATTTGTATTTAAAGCGGTCGCTTTAGAGAAGGAATTGAACCAGATATAAGGGAGGCTGTGATATGTGAGCCAATATTGTTATCAAAAAAAACTAATTCCAATTTAAAGTTGTGTAGAAATCCGAGGGGAGGGCGAGTAATTTTGTCAATTAATTTACCCACTTGAACTCATCTATATAATACTATACTCCCAACTCCAGC…
TRINITY_DN37_c4_g2	AGTGCAATGACTAGGGGATTCTCGCAGTAGAGCATAGCCGGGTTCCATTCCCGTCTTGGGGTCACTGTCATCAAGGTTTACAGCATGGAAACAGGCCCTTCGGCCCAACTTGTCCATGCCTCCCTGTTTTTTAACTGTTAAGCTAGTTCCAATTGCCTGCCTTTGGCCCATATCCCTCCATACGCGTCTTATCCATGTACCTGACTCTTGAAAAGACAAAATTGTACCCGCCTCTACTACTACCTCTGGCAGCTCATTCCAGACACTCACCACCCACTGTGTG
TRINITY_DN37_c4_g3	TGCACTGCAGGAGGAGGTCATTCGGCCCAACAACAGTCCCACCCAGGCCCTATCCCCATAACCTTTCAAATTTATCCTCCTAATCCCCATGACACTAAGGGACAATAGAGCATGGCCAGCCCACATCTTTGGGAGGAAACTCACGCAGACACAGGCAGCATGTGTAAACTCCACACACAGACTCACCTGAGGCTGGAGTTGAACCCAGCTCTCTGGCACTGTGGCAGCAGTGCAAACCACTGTGCCAGACCCAGATGGTCAGATAAAGTGGGCAATCATAATTGTCCAAAAATCAACTTGTATCTGAGCGAGAGTATCTGCCAATGGAAAGTCTAGCCCTAATGTCACCAGTCAGAGGCTTACAGCATGGAAACAGGCCCTTCTGCCCAACTTGTCCAT…
TRINITY_DN37_c6_g1	ATTACAGACAGATCCTCTTCAGGTGATGGGTGTTTGACTAATAACCATGGATAATGTGCTATGGGACAGCAAGTTCTACAGATTTACTACCCTCTGTGACCAAGTGAACCCGTTGAACTTTGGCCTGGTGTTGTGAGACTTCTTAGTAAAGTGAGCCAGCTCACAGAAATAGGAATGAAGTAGAATCAGACACTGCTTTAGCTAGTGATGTGAATTATAAACAGATCCTCCCCAGGTGATGGGTGTTTCACAACAACTATGGATAACATTTGTACTCTCCTGTCTGGGAGGACTACTATCCTGAGTGAGGGTTAGTCTCGACAGATCTGAGTTCCCTCAGCCCATCATGGCACAAAGTCTTAACAGAATGATATATTCACCATATGCCCTTCACGATTC…
TRINITY_DN37_c6_g2	GTTTACAGCATGGAAACAGGCACTTCGGTAGTCCCAATTGCCTACGTTTAGCCCATATCCCTCTATACCCATGTATCTGTCTAAATGCTTTTTAAAAGACAAATTTGTACCTGCCTCTACTACGCCCTCTGGCAGCTCATTCAAGACACTCGCACTTTGTGTGTGAAAAAATTATCCCCCCGAACTCTTTTGTGTCTCTCTCCTTGTCCATGCTGCTCTTTCTTTTAAAAAAACCCTAAACTAATCCCAATTGCCTGCATTTGGCCCATACCCATCATATCCATGTAACTATCTAAATGCTATTTAAAAGATAAATTTGTATCCACCCCTACTACTACCTCTGGCAGCTTGTTCCAGACACTCACCACCCTCTGTGTGAAAAAAGTTGCCCCTCTGGAC…
TRINITY_DN37_c6_g4	ATTTACTCTGTCAAATCTGTTTAAAATTTTATATACCTCGATCAGATCCCCTCTCATCCTGCTAAACTCCAGTGAGTACAAGTCCAAACTGTTTCTCTCCTCAAATGTCAACCCCTTTATGCCTGGAATCAATCTAGTGAACCTCCTCTGAATCAGCTCCAATGGCAGGGTGCTCGCTTAGCATGCGAGAGTTAGTGGGATCGATGCCCACAATTTCCACTTTCATTGGGGTGTCATAGTGGTTAGCACTGCTGCCTCAGAGCGCCAGAGACCCGAATTCGATTCCCGGCTTGGGTCACCGTCAT
TRINITY_DN37_c9_g1	GTGGCCCGGGGCTGGAGTTGAACCCGGATCCCTGGCACTGTGAGGCAACAATGCTAAGTTGAGCCCGGATCCCTGGCGCTGTGGGGCAGCAGTGCTGGCCACTGTGCCACCATGCCACCCAAAACTACTGCAGCTAAATCCTAATTTAAACTAGCGCAAGCAATGGGCCTTGTATCTTGTTTTAAAATTCTTTAATAATGAGGTGGGGGGTGGGGGTTGAGGGAAATGGGTGAGATTGGGCCTCTGTCACTAGGTGAAGCAGCTGCTGCTCAGCACTATCCTCACTATATAAATGTAAATAAATAAAGTTGTTTATACACATTGCTTATACACATTCAACATTGTAAGTTGTTCTTTAAAATAATTAATAAAACTAAAGATGCAAGTTCTGCC
TRINITY_DN37_c10_g1	CAGTGCTTCATGTGTCTGATGCATCATACTTTTACAATTTTTTAAAAAATAAATTAAAATTGAATGTTAAAAAGTAACAATAACTAGCAGCTGTTTCAACCATGCTTATAATTGTGAAAAAATGAGAATATGTAATTGGTCACTACAAGCAGCAGCAGCTTAATGGCACTATAGCACTTTTTAAAATAACTATTTTTCCAGCTTTTTCCCTCCCCTCTTGAAAGCACCGATTTGTGTGAGGATTATGGTTCCACCAGTGCCCATGGTCTTCTGCAACCTTTCCCAAATTACCTTTTGTGAAATGCTTCAATCTTAAATAACAGCAGAATATTCAGCAGTAGAGATGCAAGGTAGCCTTACCCTCATTTCAGTTTCCAACAGCAGTTAGGGGTGTGAATG…
TRINITY_DN37_c11_g1	TCACTGTTAGAAAGATGAGTGAAATAAATGGCACAGTGGTTAGCACTGCTGCCTCACAGCACCAGAGACCCAGGTTTGATTCCGGCCTTGAGTGACTGCAGAGTTTGTTCTGCATCTGCATGGGTTCCCTGCCACAGTCCAAGGATGTGCAGATTAGGTGGATTAGCCATGATAAATATATGGTGTTAAGAGGATAGGGCAGGTAGTGGGCCTGGGTAAGGTATTCTTTGGGAGAGTTGGTGCAGATGGGCTGAATGGCCTCCTGCACAGAGGAGGTTCTTCTAAGTTTGCTGTTTGGACGAGATTGTACATTTGATTAGGGATGTTGCTTTTATTCATTTTTTTTTATCTCTGAAAAACATGCTGAGTTCTCATTTGGGTGATTGCTGTTTGCCCAAT…
TRINITY_DN37_c11_g2	AGGAAACCCATGCAGACGGGGGGAGGGCGTGCGGACTCTGCACGGACGGTGGCCCAGGCTGGGAGCCTTAGTCGCCACACTCTGTTCAGGTGATCCGAAGGAGAATTTAGCACGGCCAATGTGCCCTAACCAGCGCGTATTCTGGACTGTGGTAGAGACCGGAGCACCCGGGGCAAACCCATGCAGACACGGGGAGAACATGCAGACTCTGCACAGACAGTGACCCAAGCTGGGAATTGAACCCAGATCCCTGGTGTTGTAGGGCAGTGTGCTAACCACTTTTTTTTAAAAGCATACACAACATTGATGCAGGGGCAGAAAAATAACAAAAAAATTACAGTTTGTATCAGAACGCAAGACTAAATCTAATGTGGAAACTTCAATTGTCCCAGACCTCTT…
TRINITY_DN37_c11_g3	GTAATTCCTGTCGCTATTCCCGGAATCCTGTAGAAACAGGATCCCTGCAGAGCAGAAGGAGGCCTTTTGGCCCATCGAGCCTGCACTGGTCCTATCCCTGTAACCCCACATATTCACCCTGCTCATCCCCCTGACATTAATGAGCAATTTAGCATGGCTAATCCATCTAACCTGCGCATCTTTGGAGTCTGGGAGGAAATAGGAGCACTCGGAAGAAACCCATGAAGGCATGGGGAGAACATGCAAATTACACAAAGTCACCCAAGGCTGGAATTGAACTCAGGTCCCTGGCACTGTGAGGCAGCAGTGCTAACCACTCTGTCACAGCAATGACTTCTTAG
TRINITY_DN37_c13_g1	CTCATGGTTCCAAATAGACCTGTTGGACTTTGGCCTGGTGTTGTGAGACTCCTTACCATATCACGGGGACCTCAGAGTCATTTAACTCTCTGATTCACTCTTCAAAATACTGGAGTCCAGGACCAAACAAATGTGTGGAGATTTTCAGCAAAGAAAGAAGGGGAGGTCCGGGGAAGTTGGGGAGAGAGTGGTGAGGTCTTGTTGGGGGAACACCAGGTCAGGGGAAAGAACACCTGTGAGGAGTAGGCCTTGGGAAAGGGTGCCTGATGTGGAATGGGAGCTCTTGGGGGAAGTGTCACTGCCTTAACACCTGAGGCCCTAATAGGGAGACAAGCCACGCTTCTCTGTCCCTGAATTCTTCCTGCAATCCTCAAAATCAAGACCCTGGGGGTGGAGGGA…
TRINITY_DN37_c14_g1	CCCCTCTCACCTTAAACCTATACCCTCTAGTTTTAGACTCCCCTACCTTTGGGAAAATATATTGACTATCTATCTGATCTATGCCCCTCAAGGCGTCCAGCTAACCTCTGAAAACTTATACTTGGGCTACATTTAGACGTCCTCCAAATGGCCTTCGGGGAAAATTAGCTTGTTCTCTCATTCCCTCATTACCCGTCCAGCAACACATTCTGAAAGTAGTTCTGCCGTTTGACAGTAGGGTTGAATCTAGTCTCTCAATCTCATAGCCCACTGATGTTCATTGTGTATGCTTTCACACGAAAGATCATATTTTATATGGTCGCCACTACCTGTGGAAGTCATTGCTTAGGTAGGGGAGAGGGGACACTTCGAACAACGTAAGATTTTCTATCGGGTTTT…
TRINITY_DN37_c16_g1	ACAATCCCCACCCAGGCTCCATCCACATGACCCCAGGTATTTACTCTGCTAATCCCCCTGATGCTAAGGATGGGATTTTACAGGCTTAGGTGAAGTCGTAAAGTCCTGCCTGAGGCCCACGGAAATTTCCGTTCTGGGAATCTCACCCACTCTGGTAGAAGTTCGGCGTAAGTGACATGGGCAGTCCACCTAACCCGCACACCTTTGGATTGTGGGACGGAACCGGAGCACTCAGAGGAAACCCAGGGATGGGAAGAATGTGCAGACTCCACATAGACTGTGACCTGAGGCTGGAATTGAACCTGGGTCCTTGGTGAC
TRINITY_DN37_c17_g1	CAATTCCTCTCTTGGATCACTGTCTGTGTCTGATTGGGCTTCCTTTGGGTGCTCCAGTTTCTCCCACAATCCAAAGATGTATGGGTTAGGGGGATTGGCCATACTAAATTGCCCCATTAAATGTCAGGGGGACGAGCTAGGGTAAATGCATTGGATTATGGGGATAGGGCCTCAGTGCAGACTCGATGGGCCGAATGGTTTCCTTCTGCACTTTACGGATTCTGTGATCGGAAATGTTAAGTCGTTCTCGCTCCCTTTTTCCCTTTTGTGTTCTGTCACTTATACTAGTGAGCGATGTAAAGTCATGGAATTTCCCATTTTTTAAAGAAAAGGTCAAAGGGGGGATTGTGGACAGTTTTCATCCAGTACGACACCCCTTTGCCTGTTCAAATTCCCTGC…
TRINITY_DN37_c19_g1	GTGTGGGTTGGGTGAGTTGGCCGTGGTAAATTGCCCTTTAGTGTCAGGAGGACTAGCTAGGGAAAATGAATGGGGTTGTGGGGATGGGGCTGGGAGGGATTGTGGTTGGTGCGGTCTTGATGGGTCGAATGGCCTCCTGAACTGTGCAGGATTCTGATTCTATTCAAATCATAGAAACCCTACAGTGCAGAAAGAGGCTATTCGGCTCATCGAGTCTGAGCCAACTACAATCCCACCCAGGCCCTATCCCCATATCCCTATATATTTTACCCACTAATCCCTCTAACCTACGCATCTTAGGACACTGAGGGGCAATTTTAGCATGGCCAGTCAACCTAACCCGCACATCTTTGGACTGTGGAAGGAAACCAGAGCACATCCTGAGACACTAAGGTGCAA…
TRINITY_DN37_c19_g2	TAGGGGATTTTCACAGTAACTTCAATGCAATGTAAATGTAAGCCTTACTTATGACTAAATAAAACATAAAACATGTAAAAAGCCCAGCAACACAACTGTAAACCTCACACCCCAAGACTCAAGTTGAATTATAATGATAATTCTGTTCAGCAATTGGGAAATGCAAACATTCGTGCTTATTCACTGAAGGGTTGCTTTTTGTGTTCATGGTTAGAAACATGGTTGGCATAGAGTTTTTACTGAATACTTAATTTGATCTGCACCTAACATCTTACAATGGCACTGTGTGAACGTAGATGTCTTCCAGGCCTTGCTTTTGCAACCACAGATGGGAGTTCACCACCTTTCCACATACCATAAGTAGAGAGCTTTGATCCCACAGTATCAATGGAAACACTA…
TRINITY_DN37_c22_g1	GGCGCAACTCGTGGGCCGAAGGGCCTGTTTGTGCTGTAGTGTTCTATGTTCTATGCTCTCTGTGAATGTCAGTCGGTATGTGATCGAGGAACTTGCATTATAGTTTTCCATTGACAATGTACACCCGTTGAGAAAATTTTAGAATCAGAGTTTGAAACAGGACCTTTGGCTCAACTTGTCCATGCTGCCCAGTTTTTACCATTAAGCTAATTCCAATTGCCTGCATTTGGCCCATATTCCTCTATACCAATCTTACCCATGAAACTGTCT
TRINITY_DN37_c23_g1	GGGGTAGATTGATTGGCCATGCCCAGTGTCAGGGATTAGCAGAGTAAATATGTGGGATTACAGCGGGGAGGGATTGTGGTTGGGGCAAACTCAATGGGCCGAATGAATGGCCTCTTTCTGCACAGCAGGGATTCTATGAGATCAGTGTTCTGTACTTGGGGGCCGCCACGTGATTTTAATGTGCCTTTGTGTCAGAAGTGACGTGATTACTCTGACCGCTATTGTGCCCCTCCCTCCTCCGATTTGGCAATAAAGCCAGATCATCTCAAACAAATTGCAATTTCTTTGATCGAGAATCAAACTAACCCAGCCCATCGCAGAGGGCAAAGTACCAAAAGCATTTTACTTCACCTTCAATTTTTTTTATGCTGGCCATTTCCAAAACTTAACTGTGTAGGA…
TRINITY_DN37_c30_g1	CAATGAAAACAGAAAATGCTTGATAAACTCAATAGCTCTGGCAGCATCTGCAGAGAGAGAGAAAAACAGATTTAAGGTTTCAAGTCCAATAAGATTCTTCCAAATTTTCTGTTCTAATTTCAGATTTTCAGCATCCGCTGAATTTTTTTACACAAGTATCACTCGGCTTGTTTCACCTTTTTATTGCCTAACCTTAATAGTGCTCAAGTGATATGCCAAGCCACTTCAGCGGGCTGTTAAGAGTCAAACATGTTGCTGTATGACGGGAGACTTGTAAGAACGGCAGGTTTCCTTATCTAAACTACATTATTGAACCAGTGTTTCAGACAATCTGACGGTTTCACAGTCACTTACCAGAATTTCTGGACGTATTAGTCTGGTGACAGAATTTACTATACG…
TRINITY_DN37_c33_g1	GTCTGCTTAGAAGTTCTTTTATTGCTGCGTCAATGGTTTAAATGGGGTTTTGTTTACTTCACTCGAGGCTTCATGCAGTGTCTGGGATTTTATGATCTTTTGCATTGTTGAGGGGAAAATGATTGATAGTCAGGAGACAAGAGTTCTTTTAATTTCAGTTTTGGGCTGCCGGCTGCTGTTTTAGTTTAGAAGTTGTTTGGACATCAGACTGAAAAGCAGTGTTTTTCTTTCTCTCTCCCTGATATT
TRINITY_DN37_c33_g2	CTTGGACTGAAACACTCTGACTGATCAATTGACACAAAACAAAACTTTTGGCTGCTCGCTGCTGTTTTAGAAGGGGTTTGGACATCAGACTGAAAAGCAGTGTTTCTCTCTCTCTCTCCTTGGCATTAGAAATTCTGCTGGTTAGCTGGAAGCAAGGCTTCTTGCCTTCTTGGAGTGAAAATTCTGCGTACCTTATGGAAAGGTTGAAGTGCTAGCTGCTCATGCTTGAAAGAATAAAGTTAGGTCAACTACTGTGAAGATTTGTACAGCTGTAAAGGATCTACAAACTTCTATAGTTGCGACAAACAAAGCATTATGTCTCATCCACGAATGGACCAGATTGACAAAGAGAAGGATGAAGAACATGCTTCTTATACTCTAGGAATTTCTTTTGCTGTG…
TRINITY_DN37_c35_g1	ACCCCCTGATGTGAAGAGGCCAATTTAGCATAGCCAATCCACCTAATTCACACATCTGTGGACATCTTATGATTTGCTATCAAATCTTGTTTGATGATGCTTCTGTCAAGCACCTCAGAACATTAACGGTGCTGTAACACAAGGTATTGTGGACAGATCCCAGAGTGGGTCAGCATTCATTCAAAAAGGAAGGGGAAATGGTTTAATGTTCACTTAGTTAAGCAAACGGTAAAAAGATGCTCACAATCTCACTGTTTCAAATGTACTTTAATTGCTATGCAAATATGAATTGAACTATACAATTATCACTCAGCATGTTGCATGCAATGTGGAAGAGTTGAGCCACTCCCAGAATTAGTTCTGATTTCGAGCTTTCTGGCTCGTTTTAAACTTCCCGCA…
TRINITY_DN37_c38_g1	AATGCTGCCTCAGTGCCAGGGAGCTGGGTTTCTTTTCACAGTCCAATGATGTGCAGGTTAAGTGGATTGGCTATGCAAAATTGCCCTGGTGTAGGATAAGGGAATTAGCCATGGGAAATGTGGGGTTTTGGGGAAATTGAATGCGGGCAAGGACTTGGGTAAGATACTGAGTTGGTTCATCAAATGGCTCATGTAAATGGAATGAGTCATATGTTTGTATATAGGATTGTATGGTAGAAACTGAATACGTAAACTCCAGTTTCCTCCCACTGTCCAA
TRINITY_DN37_c42_g1	TATACTAATCCCTTTTCGTCCATAAACCTATCTACAGATCTCTTAAACGCCCCCAAACTAGGCGCATTTACAACTGGATATGTTGGCTCTCACCTTCCAAAACTCTGTAAATTCTGGAATAATCCTTGTAGATTGGGGATTGGCAAATATAACCCACTATGTAAAATTAAGGGCCAGAAATCTACCACCTTGCCCACCACGGAATTGGCGTGGGTGAGGGTGTGACAATGGAAATCTTCATTGGCCTTAGGCTGGAATTTCCGGTCTCACCCGAGCAAGACTGTAAAATCCCACCCATGATCTGTTAGCCTAACATCAGCAGTATGGAAAATGCTAGAGTCTGTTACAAAGAATGCAATAACAGGGCATTTAGAAAATACCAAAAAAGAAAACGCTGGG…
TRINITY_DN91_c0_g1	CGACAGACAGATGGAAAGCATTCTTTTTGGTTGTATCACAGCTTGGTATCACCGTGCTGCCCAAACAATAATGAGAGAGAGTACAGGAATGAGATGGAGAATCTGGTGAGACAGTGCAACGACGATAATGTCTCTCAATGTCAGCAAAACGAAGGAGATAGTCATCAACTTTAGGTAGCATAGTGGAAGCCTACCGCTGTCTACATCAATGGGCATGAACGGAAAAGGTCAAGAGCTTAAAGTTAAGAGAATTTGGTGAACTGGTGCAGCGACAATAATCTCTCCCTCAATGTCAACAAAATGAAGGAGATTGTCATCAACTTCAGGAAGTGTCGAGGAGAACATGCTCCTGTCTACATCACCGGGGACGAAGTAGAAATGGTCAAGAACATCAAGTGT…
TRINITY_DN91_c0_g2	CCACCATCTTCTGTCGGGAAGAAGATACAAAAGTCTGAGGTCACATACCAACCGACTCAAGAACAGCTTCTTCCCCGCTGCCATCAGACTTCTGAATGGACCTACCTTGCATTAAATTGATCTTTCTCTACACCCTAGCTATGACTGTAACACTATATTTTGCACTCCTTTCCTTCTCTATGTACATTATGCATTGTCTGTACAGGGTGCAAGAAACAATACTTTTCAAGGAGTGCAACGCGAAGTGACACTCCCGATGAAATTATGCCGCTCTCTCAGGGTGACGATCATTTAATTGTCCAGTCACTATATCCTGATGAGAAACCTGGAAGGATCATAAATTAGCTGGATCTGGGCAATGTGGAGATCCAGTACTCACGGTTCAGTCCTGCAGAGTTG…
TRINITY_DN91_c0_g3	GGAAATCAATTCCCCATTCTTAGCATCCCATTTAAAAGTTTGTATTATTTTTGTATTCAAAATAGCTGTTGTTCATGGCATTTTCCAGGGTTGTGAATGTAGCCCAGCCTCCCATCCATTGACTCTGTCAACACTTACTGCTGCCTTGGAAAAGCAGTCACATAATCAAGAACCCCATGCATCCAGACATACGCACTTCCACCTTTTTGCATCAGGAAAAGGATACAAAGGTCTGAGATCACAACTGACTAAAGAACACCTCCCCATCTGCCATCAGACTCTTCTTCTTGCTGCCATCAGATTTGGTCTTCTTGCTGCCATCAGATTTTTGAATGGACCTAACATATATTAAGCTGATCTTTCTCTCCATCCCAGCTATGACTGTAACATTAAATCCTG…
TRINITY_DN91_c0_g6	GGAAAGGAGAGGTGCAGGATTTAATGTTACAGTCATAGCTGGGATGGAGAGAAAGATCAGCTTAATATATGTTAGGTCCATTCACAAATCTGATGGCAGCAAGAAGAAGCTATTTTGAATACAAAAATAATACAAACTTTTAAATGGGATGCTAAGAATGGGGAATTGATTTCCAGAAAATCAGAATGTATTACTTTGAGTGTATTAAGAGAGATATTGCCTTTAAATTTCATTTTCTCAACTGTAGCCATTATAGCAGCCTTTTCCTTGCAGCCAGGAGTTACCTAGCCATGGCAGAATTACTCATTTTCCTAATTACGTTGTGCACACAATACCCTGCACATTGGAAATTTAGGAAATAAAAGACAGAACCTACTAAAAGATAAAAGACATTGCTTC…
TRINITY_DN91_c0_g7	AGCCTCCCATCCATTGACTCCCATCTACATTTCCCGCTGCCTCAGCAAAGCAGCCAGCATAATTAAGGACCCCGTACACCCCAAAGCTTCTGTCTTCCACCATCTTCTGTCAGGAAAAGGATACAAAAGTGTCAACGTACCAACCAACTTAAGAACGGCTTCTTCCCTGCTGCCATCAGATTTTTGAATAGACCTACCTTGCATTAAGTTGATCTTTCCATCCTAGCTATGACTGTAACACTACATTCTGCACTCTCTCATTTTCTTC
TRINITY_DN91_c3_g1	CTGTTATCAACTTCAGGAAAGCGTAGAGGAGAACATGCCCCTGTCTACATCAATGGTGATGAAGTGGAAGTGATCGAGATCTTGGAGTTTTTGGGTGTCCGGTTGACCGGCGGCCTGTCCTGGTCCCTCCACATTGATGCCATGGTTGACTAAGCCCACCAATGCCTCTACTTTCTCGGAGGACTAGGGGGGTTTGGCATGTCCGCTGCGACTCTCACCAACTTTTACAGATACCCCATAGGAAGCATTCTTTCTG
TRINITY_DN91_c5_g1	AGGGTGGCTCGCGCTTCCTCAAAGCGCATCGCTCCCAATGCCAGTGCCCAGGTCAGGATCGGACCGCCGGCGGCCTCCTCACTCTGAGTGAACGGCAAGGAGGCAACCCGGTTCCGGGCGAATTCGACGGATAGAGGGGGAAAGGGGGTACATTTCTGTGCCGGTCGCTGAAGGGAGGGGATTCAGGCTGGCTGGAGGGAGAAGAGCAGCTCCATACAACTAGCTATGGCTTTAAGTGCTTTGGAAACACTGACTTTGGGAAACGTAGAGGAGGACATGCCCCTGTCAACATCAACGGGGATGAAGTGGAGATGGTTGAGAGCTTCAAGTTTCTAGGTGTGCAGATCACCAACAACATGTCCTGGCCCCTCCACACTGAT
TRINITY_DN91_c14_g1	ACAGGGATATCCACTGCTTGCTGAAGTTCAAGTCTGAGGCATTCAACTATCACCCAAATCAGACCACAAGGCTCCTGCACAAGGCTTATAAGCAAAAAATGAAGCGGGAGAATCCATCAAAGAAAGCAGTGCAATGTTGATCTGAGGAATCGGTTGACTGCTTAGAGTCAGTGAATGGGTCTGCATTTAGAAACTGTGCAACAGCCTGAATAAGCACGCCACTACGGTAACTGACTTCATTAATAAGTGTGTAGAAGACTGTGTGCCAAAGAAGGACATCTGTGTGTGTCACAGCCAGAAACCATGGATGAACAGAACAGTCTAGGTCTGAGGGGTTCAAGTCAGGTGACCCTGACCTATACAAGCAAGCCAGATATTATCTAAGGAGCTCCATCAACA…
TRINITY_DN32_c0_g2	GGACAGGGTGGGATTGTTGTTGGTAAGGCTCGATGGGACAAATGGCCTCCTTCTATACTGTAGGGGTTCTATAATCGAGCACTGTCCACTTGTCCTGGAGTTGTGATTTTGTCCTCATGGTGTATAAAAATTAGTCAAATTATGCTCAATTTTGCAGAGTAACCCATCTACGACAACAGAAATTGTGCAGCTTTAAAGGTAATGTCATTAATTATTTGGCGCGGTTGGTCAAAGGTTGCTCTTAATGAGGCTGTAGTTCAATTATGGCTGATCTTTAACATGGAGTCAGCAAATCTAATGACACCAGCAATTGCTGCTGGAATGAGAGAGGCAGACTGTGCACGAAGGAGGGCTAGTTTTCAGTCTGAGGATGGACTGCTCCTGTTAGATATATTGGGC…
TRINITY_DN32_c1_g1	CTGGGATTGAATCCAAGTCCCTGGCACTCTGAGGCAGCAGTGGTGACCTGGGCCGGGAGTCGGGCCTGGGTCCCTGGCACTGTGAGGTGAGCAGTGACAGCCACTGTGCCACCGTGCTGCCCTTTAGGGAGGGAGTTCCAAGCTGCAGATGATTTAATCATTCACTTCCTGCTTTCCCTCTTCCCTTACTGCAACCTGACCCTTCTGCCCTTCTCCTTTCAGTTCATATGATCAGCCAACTACTTAGGAACTGGCACTATGTGTATTCGAGAGGCTGATAGAGGCAGGATTTGAGCTTAGGCAGTCACTGGGCACATCAAACCCATATATCTTTGGACTGTGGGAGGAAACCTTTTAGACAAACAGTGTGCAAGCTCCACACAGTCACCCAAGTCTGGG…
TRINITY_DN32_c1_g2	GTCCAGAGATGTGCGGGTTAGGTTCATTGGCTATGCTAAAATTCCCCCTTAGTGTCCTTCTACAGGGAGACTTAGATAGGTTGCAGAGCTGGGCCGAGAGGTGGCGGATGGAGTTTAAGGTTTGAGGGATTAGTGGGTATGATATGAGGGTAGGGCCTGGGTGGGATTGTGTTTGGCGCAGACTCGATGAGCCAAAGGGCCTCTTTTTGCACTGTAGGGTTCAATGATGATACTACTTTGAGGCAAGGAGATTTTCAGGAATTATGTAAGATGTTTGTTTTGTGCCTCAATGTTTCAAACATTGTTAACATGGCTGTAGATGGGATTTAACAGTAGAAAGGACTAGGTAAATTTGGAATTAGTTATAGGAATCAACTTAACATCAGATTAACAGCACTT…
TRINITY_DN32_c2_g1	AACTCTTCAGCAGTCACAGGCATTTGGTCTCTGATCTTCGGGTAAGCATTCTCCAAGGCGGCCTTCACGACATGCGACAGTGCAGAGTTGCTGAGCAGAGACTAATAGCCGAGTTCCACACACATGAGAACGGTCTCAACCGGGATCTTGGGTTCATGTTGCACTATCTGTAACCCCATGACTTGCCTGGGTTTGCAAAACCTCACTTACCGAAC
TRINITY_DN32_c2_g2	CCCCTCTGACAATAGCATTGCTGCAGCTGCCTCAGTACTCAACACTGACAACTGCCAGTTTCCTGATGCAATTTTACAACTCATCTGCTTCACCTCAATATGCCAACATCTTCACGCACAGGTTTGAACAAGATGTCTTCACCGCGCAGGACCTTCAGCCGATGCTATTAATGACACTAGATACATCAATGACAACACTTCTTCACCACATCGGACCTTCAACCGATGCTATACACTAGATACAGGACCTTCAACTGATGCTATACCCTGGATACATAGATGATTAGAGTGGCTAACAATGTGAGTGGAAAGCAAACACACCTGTCCGTCCCATCGTATCGGGCAATGGAACTCTGTGTGAGAACCTCTCCGGCTACGTCGAGGACATCCTGAAACCCA…
TRINITY_DN32_c2_g3	CACTTCAGCAGTCACGGGCATTCGGCCTCTGATCTTTGGTAGACGTTCTCCAAAGTAGCCTTCATGACAGACGACAGTGCCGAGTCGCTGAGCAGAGACTGATAGCCAAGTTCCGTACACACGAGGACGGCCTCAACCGGGATCTTGGGTTCATGCCACACTATCTGTAACCTCCACAACTTGCCTGGACTTGCAAAATCTCACTAACTGTCCTGTCTGAAGACAATACACATCTCTTTAACCTGTGCTTAACTCTCTCTCCACTCACATTGTGTCTGTACCTGTGGGGATTTGATTGGCTGTGGGGACTCGCATTCCAACCATTACCTTGCAATTGAGTTTGTGTCTTTATATGCCCTGTTTGTGAACAGATCTCCCATTCACCTGATGAAGGAGCAG…
TRINITY_DN32_c2_g6	GTCAATTTGGTAAAAACCGATTAGCCTGAGAGCACATTTTTGGGGTGTGGGAGGAAACCGGAGCGCCCGGAGGAAACCCTGGTTCCAATAGCAACTCTTGAGAACACCATTATAAACCTTTCTCTGGCCCAAATAATCCATTTAACTTTACTCTCTGCTTCCTATTGTTCAGCCAATTATGTATCCATGTTGCTACTGTACTTCTTATTCTTTTCATCCCATGAGCTAAACTTTTCTCACAAGTCTGTTGTGTGGCACTGTATCAAATGCCTTTTGAAAGTCCATGTACACCACATCATTACCTCAAAAACTCTAGCAACTTAGCTAAACATGATTTCCCCTTTAGAAATCTATGCTGGCTCTTCCAAATCAACCCACATTTTTCAATGTGTTCACTAA…
TRINITY_DN32_c3_g1	TTCAGGTAACACTGAGGAAGAATTTATCATGGCCAATGCACATTTTATAGACCTCTATAAAATCACCCCTCAGCCTTCTACACTCCAGAGAAAAAGTCCCAGTCTATCCAGCCTCTCTTTATAACACAAACCGTCAAGTCCTGGTAGCATCCCAGTAATTCTTCTCTGCTAACCAAGAGATGTTTAGAGGCAGCATGACCACTCTGTCTTCAGCTGATGTCTATGCTCAAGTACTTTCCAGTAAGGGTCACTACAGGAACCTTGGCTGCCTAACTCTGACACACATCCCGTCCCAGTCATGAGATGCTGATCCCTGAGGTCAGTGCCTCCAATGGAAGCTTACTGGTGAAAATCAGCCAACTCGGCACAAATCAACATTTTTTTATTAGTCATAAGGCT…
TRINITY_DN32_c3_g2	ATGAAGTTACTGTGAAAATCCCCTAGTTGCCACATTCTGGTGCCTGTTCAGTTACACTGAGGGAGAATTTAGCATGGCCAATGCACCTAACCGGTACGTCATTTAGATTGTGGGAGGAACTGGAGCACCCGGGGAGAACAGGCAGACTCTGCACAGGTTTGGTTACCCGAGGCTGGAATCGAACCCAAGTCCCTGGTGCTGAAAGGCATCAGTGCTAACCACTGGGCCACCTTTCCACCCACTTTGGAGTGATACAATTCTCGAGCAAAGGATAAAAATCAGATTAATTCCAGATCGTGACTCTTGAATCTTGCTGTGTTTTCCTTCTTGATCTCTCCTCACTCGTCTCATTCGCCTCATTGTCTCCTTAGTGTAGCTTGTTGCAAGCCGCATCTTCCC…
TRINITY_DN32_c4_g2	CTTTCTCCCCAGTATAATCTGTGAATGGTATGCTTTGTCTGTATAGTGTGCAAGAAACAATACTTTTCACTATATCCCAATATGTGTCACAATAATAAATCAAATTTGTCACATTTTGTTGAGGAATAATTGTTGGTTTGGACAAAAAATTGTAAAAGCAAGGGACCACACAACACAGTGGCTAATGCCCTCAGTCATAGGACCTGATGCTGTGGGATTCTCCTTTTTAAGTTATGATTCAGCCTTGTGAGGGCACTGCATGTTCTTCACTTTGTCTGATTATGTGAATACAAGTTGTACTCGGTGACCCTGATCATTCCTATTATATTTTATTCCCATCTGACTGTGAAATAAAGCAGTTA
TRINITY_DN32_c5_g1	CACACACACACACACACACACACCCCCCCCTGTCAACAGGTTCTGCTGCCCCCTTCACTGTACATTACGCAGGAGCAGGAAGGTACAGCCACTAAGCGATGTGGGTCGGGCGTCAGTGGGAGGGTCGGAGTTGACACTCAGCTCAGCAGAATTCGTATCCTTTGCTGAACAAAATGCTGGAAATAAAGGCCTTTCAGCCCCCCTCGATTCTGTTCCAGCATTCAATGGCCATTTGAAATTTAACCCTCCTTAACCTAATTACACAAATGCCTACCAATCTCAGCCCTGCCTGTGTCAATTGCACCCCCGCCCACCCACATCCTCAGCCAATTCGGACAATTAAGTTCCAGATTTCCAATCCCCTCTGTGTGTGGAGCTTCCTTGAGCTCTCACACACAC…
TRINITY_DN32_c6_g1	AAACTCTGCACAGACTGTGATCCAAGCTGGGAATTGAACTCGGGTCCCTGGTGCTGTGAGGCAATAGTGCTAACCACTGTGTAATGCAAGTGAACTTTGGGTAATTGCATGAAAAGTGTTTCTAGAAGATGCCAGAAGGTATTCACACACTGTGATGTTGAACCTTGTTCTTTTGAAGCTTTTAAAGAATGTTTCAAGGATTGTACAGAATCTTTCAGCTAATCCATTGTTTGATGGA
TRINITY_DN32_c6_g2	GCAGTGTTTCTTTAAAATGTCAAAAAGCTATTCACATGATGTGATAAAATACCTTGCTGTTTGAAGCTTTTAAAGAATGTTTCAAGGATGGTATGAATCTTTCAGCTAACCAATTGATTGATGGATGATAAGATTCAGTGGCAACCACTGCATTATTGCAAGAAGGATGAAGCACAAAGCCCAACAGAATTCATCTCACAGTAATACTGGCAGAATACCAATTGAATTGTTCCTTCAAAGACAGCCTGGGCTTTCATTGCTGAAACCACATTTATCTCAATCAATGGAACAACAACAAACCAGTCAGAAAGAGAATCACAAGAGTCGGAGCCACAAACGGTGCATGCGCAGAAAAAGCACAATAAAACTTACTCTCCCTCGACACAGCCTCCCTCAAAG…
TRINITY_DN32_c8_g2	AAAGAGTTCTACTGATCACAGGTACACAGCACATACTCCCAGGTACACGGTACATACTCTTGTGACTCGGCCAACGTTGTCTACCTGATACACTGCAGGAAAGGATGTCCCGAGGCGGTTCACTGGGGAGACCATGCTACGACAATGGATGAACGAAGACCGCTCGACAATCACCAGCAATCACTGCTCCCTTCCTGTTAGCGAACACTTCAGCAGTCATGGACATTCGGCCTCTGATTTTTGGGTAAACATTCTGCAAGGAGGCCTTCACGACATACGACAGCGCAGAGTTGCTGAGCAGAACCTGACGGCCAAGTTCTGCACACGTGAGGACGGCCTCAACTGGGATCTTGGGTTCATGTCACACTATCTGTAACCCCCACGACTTGCCTGGACTTG…
TRINITY_DN32_c12_g1	GACAATGTGAGTGGATGGGGGGTTGGGTACGGGTTGGAGGGGTCAGGTCTTGGAGGTGCAGACAATGTGAGTGGATAGGGGGTTAAGTACAGGTTGGAGAGATGTGTGTTGTCTCCAGCAGGACGGTTGTGGGATTTTGTAGGGCCGGGTAGGTTGTGGGGGTTGCAGATGGCGTGGCATGGACCCGGGATCCTGGTAGGATCCTGGTGGAGGCAAAGAGGCAGTCCACGTGTGCGGAAGGAGGCGGTCCACGTGTGCGGAGCTTGGCTGTCAGTCTCTGCTTAGCAATTCTGCGTTGTCGTGTGTCGTGAAGGCTGCCTTGGAGAATGCTTAACTGAACATCAGAGTAATCAGTATGGGTGTTCTCTAGGGCAGCCTTCACGACACACAACGCAGAGT…
TRINITY_DN32_c12_g2	AGCACTGTACCACAACAGCGCAGAGTCGCTGAACAGAGACTGATAGCTAAGTTCCGCACGGGGCCCGGGCGGGTCGTGGGGGTTGCAGATGGTGCGACAGGAACCCGCACACATGAGGACGGTCTCAACAGGGATCTTGGGTTCATGTCGCACTATCTGTGACCCCCATGACTTGCTGGGCTCGCAAATCTCACTAACTGTCCTGTCTGGAGACAATACATATCTTTTTAACCTATGCTTAATGCTATCTTCACTCACATTGTCTGCATCTTTAA
TRINITY_DN32_c13_g1	AGTTTGGTGACTGGGGGATTTTCACGGTAATTTCATTGCGTTTGGTGACTAGGGGATTTTCACAGTAATTTCATTGCAGTGTTAATGAAAGCCTACTTGTGACACTAATAAATTAGCTTTAGCTTCTTATTGGATTGTCCTGCAATAAGTTCAAGTTTCTCCCTATAATGAAGACAAAAAATGTTCAGCATGTCTGACAGTATCTATTGGGGGGGGGGGAGAGGTTTCAGATCAATCAATTTTCATCAGCACTCATGAGCTAAAGCTATGGCTCATCAAGCCCACACTGACAACAATCTTACCAGGCTCTATCCCTGTAACCTCTGCTAATCCTCCTGACACCAAGGGGCAATTTTTTAAAGTAAAGTTTATTTATTAGTCACAGTTTATAAGTAGGCT…
TRINITY_DN32_c16_g1	CTAGAATTGAACCCGAGTCCCTGCCGCTGTGAGGCAGCAGTGCTAACCCACTGTGTCACCGTGCCGCTGGGATTGAACCCGGGTCCCTGTGAGGCAGCAGCGCTAACCCACTGTGTCACCGTGCCACTGGGATTGAACCTGGGTCCCTGTGAGGCAGCAGCGCTAACCCACTGTGTCACCGTGCCTGTTGGGATTGAACCCGCTGGGATTGAACCTGGGTCCCTGGCGCTGTGAGGCAGCAGCGCTAACCCAGTGTGTCACCGTGCCGCTGGGATTGAACCCGGGTCCCTGTGAGGCAGCAACCACTAACCCACTGTGTCACCGTGCCGCTGGGACTGAACCCGGGTCCCTGTGAGGCAGCAGCGCTAACCCACTGTGTCACCGTGCCGCTGGGATTGA…
TRINITY_DN32_c16_g3	GTGTCACCGTGCCGCTGGGATTGCTCTGCTGTTAGACTGGAATCATTAGCCATACATAGAAATATAGGAACTAGGAGCAGGAATATGCTATTTGGCTTCTCCAGCCTGCTCCACTAATCTTTTTGATCATGGCTGATCAATATCCTGATCTCCCTTTCCTCCCATTTCCCTTCATCCCGTTAGCCCCAAGAGCGATAACTAATTTCTTCAAAATCATACGATGTTTTGACCTCAGCTACTTTCTGTAGGAGTGAATTCCACACATTCACCTCCTCTGGGTGAAGAGATTTCTCCTCACCTCAGTCCTAATAGGTTTACCTCTTAGCCTCAAACTATGCGGCACGGTAGCACAGTGGGTTAGCACTGCAACTTCACAGCCCCAGGGTCCTGGGTTCGATT…
TRINITY_DN32_c17_g1	AATCGGATCTGGGTGGGAGTGTTGTTGGTGCAGGTTCAATGGGCCAAATGGCCTCTTTCTGCACTTTAGGGATTCTATGAACTAAACGCACCCTGCCTCTCCCCTGGTATCCTGTCCTGTTCCATTCCTTCAGTATGAAACCACAGAGAGTATTCCTGTCATTTCACTGTGATCCATCATAGTGTTTCCTCCAGTACAGTGTGCTGTGTTAAAGGGGAGGGATACAGCGTTGAACCTCTGGCAGTTAGAGAGTTAAGAGGCATTTACAAAAGGACTGAGGCTAACACTGTGGCTGTGGGATTGTGAGGAGAGTGGTGGGATTGCGATGAATCCAGGACTGTTCACACAGGAGTACTGGACCACCACAGACTGTTGAAACTGGGTTAGACTTCAGTGTGA…
TRINITY_DN32_c19_g1	CTTGTTGAGTGGCGGGGCGGGCTCGGGGGGCCGGATGGCCTGCTCCTGCTCCTATTTCTTATGTTCTGAGGAGATTGTCTGAGATTGGGCTGTGGGAGATTGTCTGAGATTGGGCTATGGGGAGAGGCTGAAGCTGATTTCCTCCTACAGTCCAAAGATATGCGGATTAGGTTGTTTGGCCATGCTAAATTGCCCTTTAGTGCCCTGGGATGTGTAGGGTCGATGGGTTGGCAGGGTGAATTTGAGAGGTTGTGGGGATAGGGCCCAGCCTGGGATTGAGGGGCTGAATGGCCTCCTTCTGCATGTAGGGATTCTGTGATTTCTATGTTTAGGTTTTTTGTTTTATACAACAACACAAAGAACCCTTGTCTACGTGGCTTCTCCCAACCAAGAAAGTTT…
TRINITY_DN32_c21_g1	CTGCTGGGGGCGGGGGGGGGGGGGTGGTTTCCGGGTGTCATGGAGAAAACCCCCTCAGCTCCCTCGCTCCGTACACCCTGGAGTGTGGAACTCTGCCATTGCCATGGTGACATGAAACCCTGCTCACCATTAGCTGGCTAAAATGGCGGAAATTGAGTCGTTTAAAGTCTTATTTGTTAGTCACAAGTAGGCTTACGTTAACACTGCGATGACGTTACTGTGAAATTCCCCTAGCCGCCACATCCCCGTACCTGTTCAGGGTCACTGCACCTCATCAGCACATTTTTCGGGCTGTGGAAGGAAACTGGAGCACCCGGAGGAAACCCATGCAGACATGGGGAGAATGTGCAAACTGCACACAGACAGTGACCCAAGCCGGGA
TRINITY_DN32_c22_g1	CGCCTGAAGAATGAGTGACACTCGGAGGGCTTGTGCTACCAAATAAACCTGTTGGACAGGTTTGTTTGGGAGCGCAAGCTTTCGGGGTGTTGCTCCTTCTTCGGGTGACTTTAACCTGTTGTTAGACTTCTTACTATACCTGCCTTTTGAAGTAAGCAGGCAGGTGAGTAACATGACGACTTGGCCTGGAGATAGAATGGGTTGGATGTGCGATTTACTAGTTGAGACGTAACACTCTGCAGAAGATGGTGTTACACACCTTCAGGGACCCATTCCATGTTGTGCCAAGGAACTTGATCACAGAGAGTTACTATATCCATCAAAAAGATTGGGGGGTGGGTGGGGGGAACAGTGGGGCAATGGGACAG
TRINITY_DN32_c23_g1	GGGATGGTCTGCCTCGCATTCTACCTGTGACTGGTGGCAGCACAGTGGGTTAGCACTGCTGCCCCACAGAGCCAGGGACCCAGTTTCGATTCCAACCTCGAGTCACTGTCTGCACATTCTCTCCCCATCTCCGTGTCTGTCTGAGTTTCCTCTGAGTGCTCCTGTTTCCTCCCACAGTTTGAAAGATATGCACTTTGAGTGGATGGCCCATGCTAAATTGTCCCTTAGTGTCCAAAGATGTGCAGGTTAGGTGGATTGGCTATGCTAAATTACCCCTTACTGTCCAAAGATGTGTACTTTACATGGATTAGCCATGCTAAATTGCCCCTTAGTGTCCAAAGATATGTAGTTCAGGTGGATTGACCATGTAAAAATAG
TRINITY_DN32_c24_g1	GATTCTCACTCCTTCAGGTGAAGGAGCTAGACTCTGAAGGCTTGTGCTCCCAAATAAACCTGTTGGACTTTAACTTGGTGTTGTGAGACTTCTCACTGTGTCCACCCCAGTCCAACGCCGACAGCTCCACATTACAGCACAGGAGGCCATGGTCCCTTTGTGCCCTTTGAATTATCTTATTCATCCCATTCTCCTGCTTTTTTTCCCATAACCTGCAAAAATTCTGTCCTTCAAATATTGATGCACTTCCCTTTTCAAGGTTATTACTGAATCTGCTTCCATCACACTGGCAGCATGCACCATATTCCAACTCACTGTGCAAATTTCCCATGTCACTCCTGGTTCTTTTGCCAATTGTCTTCAGTCTGTATCTTCTGCTTTCTAATTCTTCTGCCAAAA…
TRINITY_DN32_c25_g1	TTCCCAGTGTCTGCGTGGGTTTTTTCCAGGTGGTCCGGTTTCCTCCCACACTCCAAAGATGTGTGGGTTAGGTAGATTGACCATGCTGAATTGACCCTAGTGTCAGGAGGATTAGCAGGATAAAAATGTGGGGTTACGAGAAGCGGCCTGTGTGGGATTGTGGTCGGTGAAACTTGATGGGCCGAATGACCTCCTTCTGTACTGTAGAGATTCTATGATTCAATGATCCAATTAGGG
TRINITY_DN32_c26_g1	GCCTGGGCTTGCAAAATCCTACAAACTGTTCTGGCTTGAGACAATTCATATCTCTTTAACCTGTGCTTAATCCTCTCTCCATTCGCATTGTCTGTACCTGTAAAGACTTAGTTACCTGCAAAGACTCGCATCCCAACCATTACCTTGCAATTGCGTCTTTGTCTATACATGCCCTGTTTGTGAACCCAACTCTCCACTCACCTGTTGAAGAAGCTTTCAACAGCTTTGAAAGCTCATGATACCAAATAAACCTGTTGCACTATAAAAAAAAAAAAAAAAAAAAAAATCCCTTATGCTGCC
TRINITY_DN32_c27_g1	GGTGAAGTGGAAGAAATTGTGCTGTATTGATGACGTATTGCAAAGAAAAGCAAAAAAAAAAGATAATTGTGTTTGTCCTACAAAAGAAAACAAAATAAATGGTTACTTTGGATTGAATATAAACAGTGCCTCAAGCCTTATTGATGAGAAATGCTACTTTGCCATCGCTTTTAAGAATGTCTTGTTTTCATTTATTTAGCCTTAAGCTGTCACAGTTTACAAGTTGATAGTAGGGATGCAAAGATTACAGATTTTTCTATTGATTTGTTTTCACAACATTTCCCCATCCCCTCTCCGGTCGACCCCGCTCTCCATCCCAAAGGAAATAACACCTTATTTAAATTTCTACGGTGCCCCTCAGAATAGGCATCAGGTCCACTTCTGACTTAAATCTCATGT…
TRINITY_DN32_c28_g1	GTCTCTCTCTGCAGTCACCCGGTGAAGGACCAGCACTCCGAGGGCTCGTGATTTCAAATAAACCTGCTGGACTTTAATGGGATGATGTGAGACTTCTTACTGAAACTACATCCTGTAACGGGGGTTTCTGAGGTTTGTGCTCAAACACAGGTGTTTTTACCCACATTACATCCCTCGTTTCCGGGTCGTCACTACTGAGAACTCTAAAAATGTTAGCTGAACTTCTAGGTTTGCAACAACTTTTTGATCTCTTTACCCCCACCCCGCCTCAGCCCCACTTTACCCCCACATCCTGAGCAGTGTGCTTCATTCTCTCCCACCAGCAGCACAAACCATCCTGGCCAACCAGTTTCTCCTGTTCGGGGAGTGGGGGTCAGGCTCAGGGTTTGCAAAGCGCAC…
TRINITY_DN32_c29_g1	ATTATTTTATAGACCTCTATAAGATCACCCCTCAAACCTACACCCTCTAGTTTTAGACTCCCCTACCTTTGGGGGGAAAAGATATTGACTATCTCGCTGATCTGTGCCCCTCATTATTTTATAGACCTCTATAAGCTCACCCCTCAAACCTACACCCTCTTGTTTTAGACTCCCCTACCTTTGGGGGGAAAAGATATTGACTATCTGGCTGATCTGTGCCCCCTCATTATTTTATAGACCTCTATAAGCTCACCCCTCAAACCTACACCCTCTAGTTTTAGACTCCCCTACCTTTGGGGGGAAAAGATATTGACTATCTGGCTGATCTGTGCCCCCTCATTATTTTATAGACCTCT
TRINITY_DN32_c30_g1	AAGGAATTGGATTGTTAAATTTACACCGGCACGGTGGCAGAGTGGTTAGCACTGCTGCTTCACAGCACCAGGGACCCATGCTCAATCCCACCAGGGCTGATTGTGTGGATTTTGTACTTTCTCCCTGAGTCTGCATGGGTTTTCTCTGGGCGCTCCAGTTTCCTCCCAAAGTCCAAAGATGTGCAGATTAAATGGATTAGACAAGGTCGATTGTCC
TRINITY_DN32_c32_g1	ATAGAGGTTTACAGCAAGGAAGCAGGCCGTTCGGCCCAATTTGTCCATGCTGCCCTTTTTTTTTAATATATGTAAATCCGTAAGCTAATCCCAATTGCCCGCATTTGGGATTGTAGATGGTTAGTATGTTCCAGCTCTACCCTCCATTCTCCTGCGGCAAAATTTAAGGTTTTTGTGTCTCGATGTTCCATAATCGCCTGCTGGTTTTATTTTTCTCTCTAAATTGTACTCTTGGATCAGTGAATTGAAGCACTGGCAACCCTTATCCTGTGGGTTGGGGAAGAGGATGAAAGGGAAGCATTCTCATCTGCTTCCTCTTCCTCTTCCCGTATTACTGAACTCCCCCTCCTTCCCTTCCCCCGCCCCTCACTCTCACACACACACACACACCCCCCAGCG
TRINITY_DN32_c36_g1	GTTCATGCTTTTAATTTCATAGAATCAGAGTCCCTACAGCGCAGAGGGAGATCAGAATCCCTACAGCGCAGAAAGAAGCCAGGGGACCCATCGAGTCTGCACCAACAACAATCCCATTCAGGTCCTGTCCCCATATTTATTTGCCTTGCTAGTCTCCCTGACACTAAGGGGCAATTTAGTGTGGCCGATCTGCCTAGCCCACATCTTTGGACTGTGGGAGGGGGCCGGAGTGCCTGGGGGGGGCCACGCGGAGGCCGGAGTGCCTGGAGGAGGCCCACGCAGACGGGGGGAGAGCCTGCAGACTCCACACGCAC
TRINITY_DN32_c39_g1	GCCTCTGAGAGTCCACCCTATCTATTCCTCTCAACATTTTATAAACTTCTATCAGGTAATATAATCAGGTAACATAGTTCATCTCCAACTCTGCTCTTTCCTCCCTTAACTCCGCATTCCACCCTAGAAATGGAAACAACCAACCAATATACCCATAGATATTTTCACTACACTTTCTCACAGCCCACTTCCTGAAGGACTGTATTTCCATTCTCCCAGTTTTTCAATATGTTTGGATGACACAATCTTCCATTCTAGCACTTTCAATTTGTCTTCATTTTTTTTTCACTCAAGGATTCTTCCGTCCACCTACTGCCCCAGCCCCTCCAAATGCACTTGACAGTGACCTTTGACCATGTCCGTTCAATTTAATGTACTTCTGTTCTCATCCCTTCTCCC…
TRINITY_DN32_c43_g1	GCATGGTCAGTGCAGGCTTGGAGGGCCGAAGGGCCTCTTCCTGTGCTGTGTTGTTCTTTGTTCTGTCAAGAAGATTAGAGTGTAAGACTCGGGAAGTCTTGCTGCAACTGTACATCTGGAGCACTGTGAGCAGTTTTGGTTCCCTTATTTAAGGAAAGATATTATTTCATTGGTGGCAGTTCAGGGAGGGTTCCCTCGGATGATCCCCGGTACAGAGGGATTGTCTAATGAGGAAAGGTTAAACAGATTGGGACTCTACTCATTGGAATTTAGAAAATGGAGAGGTGATCTCATTGAAACATATACAATTCTTAGCAGGTAAATGCTGAGAGGGTAAATGGGAGAGTCTTGGACCAGGGGACCTAGGCTCAGAATAAAGAGGAACCAACTAAGACTGAG…
TRINITY_DN32_c48_g1	GTGGTTGGCTCTCAACTGCCCTCGGGCTACTACGGGTGGGCAATAAATGCTGGCCAGCCAGTGACGCCCAAGTCCCACGAATGATTTTAAAAAAAGGTACTTTGGGAAATTAATGATTAAATAACAGCTTTCTTCCAACTATCTGTACTGTAAATTGCAGTGTAACTACTTGATGGTTTTATTTTGATTAAATGCTGCTATTAAATTGGTTGGGGACTGATGGGGGAGGGGGGAAGGGGAGGCAAAGTTAGGTTTGCCTATTTTCTACGCTGCACTCAAAGTGTTCAACTGCTCACTTGGACAGCAATACAGAATGGTGCAAAAGAAAAACCAGCTGATTTCAACAGCTGACTGCTGTATCCACCATGTTGGTGGGAATGATGGAAGAACAAGGAGTGT…
TRINITY_DN32_c49_g1	CAAGAAACAGAACATTAATTGATTGACCTGTAGTGGCTAAAGCCAGTGTGTGTGCGTGTGTGTGTGTGTGAGATGCTGTCAGTGCTGCACAATGTATTATCTGGAAACACAAATGGAAATTATAATTTTGGCCGTTGCAATGTTAACCAGTAACTAACTCCAGCAGGCCTGTTTCGGAGTACAATCCAGTCCAGTTCATTATTGTTTGCACTTTGATTCTGGCCTCGCTTCCTGCTAATTTAAAACCACAGCAATAGTCGCACGTAAGCAGATCTACACTAGTGAATGTATTCTGACCATCTTCTCCATACACTAATAGCAAGATCAATCAGTATAGAAGGTACAGGAACAATCTCATTTAGTTGAGCAAAGCACATCCTTGGCTCTAGCCAAGGAAAT…
TRINITY_DN32_c54_g1	GGCTCGGGGGGCTAGATGGCCTATTCCTGTTCCCATTTCTTATGTTCTTATGTTTTTGATCCTTCTCACTTACTGGATTCCCTGTACACTGGCTTTAACTCTCTCCCTGGCCACTATCTGAGGCTGAAGCAGATTGTTTGCAACCTTAATGTCGTTTGTGATCCTGAAATAAGCTTCTGACCGCATTTCCTGCTTCCAGTTCTGTAACACTGATCAGCTGCTGAAACCCTCATGATCAGGGCAGCATGGTGGCATAATGGTTAGCACTGCTGTCTTACAGCGCCGGAGACCAGGGTTCAGTTCCTGGCTTGGG
TRINITY_DN32_c67_g1	AGCTGTTCCCAACTCTCACCCTGTCCATACCCCTCGTAATCTTGTACACCTCAATCATGTCACCCCCTCAGCTTCTCTATTCTAGAGAAAACAATTCAAGCCTATTCAGTCTCTCCTTCTAGCTCTAATGCTTCGTCCCATCGTAATGTAGGAAACATGACAGCCTATGTGCACATAGCAAGGTTCCCACACGCAGAGAGGTGGCAATGAGCACATATGGGCAGAATTTACCAGTCCCGTGTGTCACAGGATCCGTAGTGGGCGGGACAGGGCCATACAAAGATCTGTTGAGCTGGGGCCAAATTTTCTGGTCTTGGGGCAAGATTGGCCATAATGTTGGATGAGGGTTGAAGGTTGGTCCAGTTACCAGGGGACAGTAACAAGTCTCACAACACTCAG…
TRINITY_DN32_c69_g1	GTCTTTATATGCCCTGTTTGTGAATAGAACTCCCCACTCACCTGACAAAGGGGCAGCGCTCCAAAAGCTAGTGGCTTTTGCTACCAAATGAACCTGTTGTGAGACTTCTTACTGTGTGTGGAGTTTGCACATTCTCCTTGTGTCTATGTGGGTTTCCTCTGGGTACTCTGGTTTCCTCCCACAGTCCAAGGATGTGCGGGTTGAGTTGATTGGTAGCGG
TRINITY_DN32_c110_g2	CATAGATAGACAAGGAAAGGAGAGCGCAGAATGTATTGTTACAGTCATAGCTAGGGTGTAGAGAGAGCAACTTAGTGAGGGTAGGTCCATTCAAAATTCTGGTGGCAGGAAAGGAGCTGTTTTTGAGTCAGTTGGTGTGTGATGTGATCTCAGACTTTTGTATCATTTCCATGACAGTGGAAGAGAGTATGTTCAGGATGTGTGGGGTGCTTGGTTATGCTGGTTGCTTTTCCAAGGCAGCGGAAAATGTAGACTCTGTTGATGGATAGAATGCTGGTTTGTGTGATGGACTAGGCTACATTCATGATCCTTTGTAATTTCTTGCAGTCTTGCAAGCAATATCAAGCTGTGATACAACCAGAAAGAATGCTTTGTGTGGTGCATCTGTAGAAGTTGGTG…
TRINITY_DN32_c139_g1	GGGTGCTCGAATCTGAAACCAAAAGAGAAAACGCTGGAAAATCTCAGCAGGTCTGGCAGCATCTGTAAGGAGAGGAAAGAGCTGACATTGTCAAAGCAGAGAGTGGCCTTTCGGCCCATCGAATCTGCACTGACTCTCCAAAGAACATCTTTCCCAGGCAACTGCCCCAGTAATCCCACCCCATCCAACCTGCACATTTTTGGGCACTAAGGCATGCTTTAACATAGCCAATCCACCTAACTTGCACATGTTTGGAGTGCGAGAGGAACATCGAGAAG
TRINITY_DN32_c140_g1	GAAGTCTTAACCAAAGGTTTAAAAAAAACGGACTTAAAATATTTATTTTATTTAATTTTTTGCATTTGGATGAACTAAGTCTTATTTTGCATTTGAAATATTTTTAATTTACATTCTGCAAAATGGAGATTTCATTCTTCAAAAGGTTAATTTTGTAAACTGTAGTCACCTTTAATGGAAAAGCGAATTGCATTGCCCCATTGTGGTCAAAAACTGTACCTGACTAAAACATAGAGCTCAGAAGTTCCAAGTTTGGCTCCTGTTCTGTGCTAATCCCAAATAGGATAGTGGAAGAGATGTAAAATTGATCTCCAGATTATCCTGCTTCTGTTGGCTATCCATTGACTGCTCATGGAATATGAGCACAGACATCAGGTGAGTACAGGATCAGACTCAGCT…
TRINITY_DN48_c0_g1	ATTTGCCCAAGGGAAGTTGAGAGTCAACCAGATTGCTGTGGCTCTGGAGTCACATGTAGACCAGATCAGGAGAGATGACAGTTTTATTTCCAGAGCTATCGGTCCTTTCAGCCTCGCTGGACAACTTCAAGCTGGTGTCAGGAGTTGAAGCAAGACTGCAAGTTCAAATATTTACCTGTTACTGCACCCTTCCTCAGGTCCACCACTCCTCTCTCTCTCTCTCTCTCTGCAGACCTCCCGTTTTGCTCAGTTAATTTAGAAAGAGAATTCTGTAAAACAAATTAAATCCTCAGAGAAGGGTGACACAGATCAATTTCAATTATTCATAGTGGATGGGCAAAAATCCTCGTCACTAAGCACATTTTCTGAAGAATGTTTGAAGAATCTTTAACACCTTGT…
TRINITY_DN48_c0_g3	ACAAAAGGTCATGAATGTAGCCCAGTCCATCATGCAAACCAGCCTCCCATCCATTGACTCTGTTCACACCTCCCACTGCCTGAGAAAAGCTGCCAGTGTAATCAAGGACCTCACACATCCCGGACATTCTCCCTTCCACCTTTTTCCGTCAGGAAAAAAAATACAAAAATCTGAGGATACGTACCAAATGACTCAAGAACATATTTTTTCCTGCTGCTATCAGACTTTTGAATGGACCTATCTCGCATTAAATTGATCTTTCTCTACACCCTAGCTATGATTGTAACACTACATTCTGCAC
TRINITY_DN48_c1_g1	ACAAAAGTCTGAAGTCACGCACTAATTGACTAAAGAACAGCTTCTTCCCTGCTGCTGTCAGACTTTTGAGTGGACTTATTTTGCATTAAGTTGATCTTTCTTCACACCCCAGCGATGACTGTAACACTACATTGTGCACTCTCTTGTTTTCTTCTCTATGAACAGTTTGTTTTGTCTGTATAGCGCGCAAGAAACAGTAATTTTCACTGTATGTTAATATGTGAC
TRINITY_DN48_c2_g1	GCATAATCAAGGACCCCACGCATCCCAGACATTCTCTCTTCCATCTTCTTCCATTGGGAAAAAGATACAAAAATCTGAGAATACATACTCACTGACTCCAGAACAGCTTTTTCCCTGCTGTCGTCAGACCTTTGAATGTACCTACCATATATCGCAGTGAGTGGTGGGTACCTGGAATGCGCTGCCAAAGGAGATGGTGGAAGCACATTAGCAACATTTAAGAGGCATCCTGATGGATACATGTATAAGGAGGAAGTGGACCGGGTTAGGGCAGAAGGTTTTTTCAGTTTAGTTAGGGCACAGCTTGGAGGGCTGAAAGGCCTGTCCCTGTGCTGGCCTTCTCTTTGTTCTTGACTTCAGAATGTGGAGTGACTTTGGAACAACTTCCATTCACTCTCC…
TRINITY_DN48_c3_g1	CGTAAGGAGTTTTCCCTCAAAGTCAACAAGAACAAGAAAGGAGTCGGAGTTTAATTCTGAAGCAATTAAAATTTTTATATTAAAAAAATTATCAATTAGCATCAGCAAAATACACCGTTGGCTGAGTGGGAGGAGGGGGGTGGGGACAGTTTCGCTGGGTTTTCCGAAGGACGGCTTTGCTGTGTGTGTGTGTGTGGGTCGCTCTGGCGGGCGGCTAAAGCCGGCCGGCGCTGCACTGAGTGTTAAAGCAGTGGTTAACGGAATTGGAAGTCGCTTTGAGGAGAGAGTGGTGGGAAGGGCAGAGCCAGTCCCAAAAGACGACTAGCTGGGCTCGGGGGAACCACTATGAGTGATATAACCATTGTGAAGGAAGGATGGGTGCAAAAGAGAGGGATTGTT…
TRINITY_DN48_c4_g1	GTGGGGGTGGGGGGGGGGGTGTAATATTCTGGTCCATGTCCTTTTTATTGTATTTATTTTAAGTAAATGCTTTGCGGCATTGGTTGATTTTGTTTGTGAATCTGTCTAAAGTAATATAAATGCCAATGTGAGGGAGCATGACTCACTATTATCTTGCACCTTCACAATTGTTCCATTCTTTTTTCCCTCTTGGTGATAGTATTAAGCATTCTAAAGAGATGACATTTTAACGAAAATCCATGAATTTAGCTAAAAATTCATTTACATTCATAAACTTGGAAATGGTAAACTCCTTTTTCTGTATTATTTGTCAAAGATTGATTTCTGAAAAGTTCCAATCTACTATTAGGAACGTCCTACTCTTTATCCTATCTATTCTTAGGAACATAGGATAAAGAG…
TRINITY_DN48_c6_g1	CTGCTGTCAGACTTTTGAATGGACTTGCCTTGCATTAAGTTGATCTTTCTCTCCACCCTAGCTGTTACTGTAACACAACATTCTGTACCCACTCCTTTCCTTGTCTATGAGTGGTATGTTTTGCCTGTATAGTGCTCAAGAAACAATATTTTTCACTGTATACTCATCTATGTGGCAATAATAAATCAAATCAAACTGAAC
TRINITY_DN16_c1_g1	TGTTGGAAGAAACTGGAACACTGAAGGAAACCCACGCAGACATGTGGAGAACATGCAGACTCCACACAGACAGTGTCTCAAGGCCGGGAACCAAACCCAGTCCCTGGCTGCTGTGAGACAGCAGTGCTGCCACGCTGCTCCAAGTTTTTTAATTTGCTTGTAATGTGTTGATAACCAAATAAGTCGTCTTAAAGCTAAATGAATGTTATTTTAGAGAAGAATTACATGTGAAATTGGAATATGAACATCATTCTATTCTTGTCAACCAGGAACTATGATATTCCATGCTATGCTATTAATATTATCATATGTTCACACCACCTGGGTTTAAAACAGTGGCTCGGGCATATATTTTTCACAGTAACTTCATGCAGGGTTAATGTAAGCCTACTTGTGACT…
TRINITY_DN16_c2_g1	GGTGCATTGACCTGAACAGGTGCTGGAGTGTGGCGATTAGAGGAATTTCACAGTAACTTCATTGTAGTATCAATGTAAGCCTACTTGTGACTAAGAAATAAACTTCAAAAACTTTAAAAAGCTCAGCTGAAGAAGGCCCAGTTTCTCGATTTGGAGTAAACCAACAACTCTCATGTCAGCACGTGACTCTAAATGATTGCTGCACTACCTTTTCACCCCATAATTATTCTGCGCATCAAGGTACTTCCTAATAAGAATGGGTTTGGCTCTGTATCCTGTTACTCAAGTGTCATAGTTTAATTTGTAGCAGTTTTACAAATTTGCATTTTCCACACCAGGGAATAGGACATTTTCCCTTGAAGATACTAACACGATGGAATAGACTCTTGTAGATCCCAA…
TRINITY_DN16_c4_g1	ATACCAAGAGATAATCTAGCATAGCCAATCCACCTAACCTGCTCATCTTTGGACTGTTAGAGGAAACTGGAGCACCCAAAGGAAACCCATGCAGACACAGGGAGAACATCCAACTCCACACAGTCACCCAAGACCTAAATCAAATCCGAGTCCCTGGCACAGTGATGCAGGAATGCTAACCACTGTGCCACCATGCCGCCATGTTGTCTTAGTAATTTTACTTCTCTCTCAACGTCTCAAATCCCTTTTTAAGTCAACTCTGAATGCATTTGGAAGTTTGTGCAAACTCAGGTTTGTTTTGGGAGTGATCCTGAGATCCTGGACACCAAGAGAGAGACTCTAAGAGGCTTGAAACTTGGGAAGAGCAGGTTGAATATGTCTTGTTCAATTGAGTCCATC…
TRINITY_DN57_c0_g2	GTTCTATGCTGATTCTCTTTGGGTTTTTTTCCGTGAGTTGGCTGCGTTTTTTGTTTCCTGAAGTTAGGACGCTAATCGGTGGAGACCCCCCCCGTTGCAGCAAAGCTGTTTCACAAGTCTGCAGATTCGGGGAGCGGAGGCCCGGTCCATCCCCGAGGCAGCCTGTTGAAACAGGGCCTGTTTGTGAAGCGCTCTGCGTCCACGTTGACTTCTGGCTCCTCCTGTTCCTCCATGGGCTCGAATCCCGAAGCCTCAAACAACCTCCTGTGACCACTGGGAAGGCCGAAGGGAGTGGGAGCTCTGTTGAAGCACCTGTACGCTTGTGACGGAGCCTTGACCGGGACCTCGGGCAGCTGGTTAAC
TRINITY_DN63_c1_g1	CCTGGGTGGGATGCTGTTGTAGAGAGTTGGTGCAAACTCGATGGGCCAAATGGCCTCTTTTTGCACTATAGAGATTCTGTTACAGACAGTTAAAGATGGCCAATAAATCCTATGAATGAATTAAAAATACAATAAGGAGCAGTGTGGGAGTCACAATTATGTCACTTTTTAAAATGGAGGTCACAAAGCAATAGCTGAAAACTTAGCATCTAGTTAGAGGTCCACAGCTGTGAGTCAGCATTATATGCAGCTGTGCTATTTGACTTGATGGTGTAACTTTAGAAATATTGAATGTAAAGATCTTGTTAGCAGTTCCTGGAAGACAATCATATAATGTATAGCGCACAAAGAGTTCAACCTTCAACTGTGCCTCTGGTTACTGCACCAAACAAGCCCTTT…
TRINITY_DN63_c2_g1	GTTGAGATGGCAGCGTGGGCTCATTGGGCCGAAGGGCCTGTTTCCCAGGCTGATTTTGTTCTTTGTTCTTTGTATTAGGTCTTCCTGTGCTCCCCGACTCCCACAGGAAAAATGAGCAAACCAATAATGGCACTGTGGAGTATGGGAGCAGCTGGGGGCTACCTGTGTAATGAGACCTCATAATAAAGGATTCCCAAAATGAGATAACATAGACTGAATATGAAATTCTATCAGAGGATAAGAAATTAGAGATAAAGGAAAATATAAAAATATGAAGGAGAAATTAGAACATTAGTAAATTAGCAAGAAATGCAAAAAGAGACAGCAAAAGCCTCTAGACATTTGGGAAAAAGTATGCATTGGTCCCTTGGAAGGTGAGATGGGTGAGTTAATAATGGA…
TRINITY_DN63_c3_g1	AGACTTCTGGATGAGTATATGAGGTTTAGTGAGATTGAGGGTTATAGATAGGTCTGTAGGTTGGTAGGTGTTGATGTGATCGACGCAACTCGTGGGCCGAAGGGCCTCTGTGTGCTGTAGTGTTCTATGTTCTATGTTCATTTAGAATGCCTGATTCAAAATGCGCAGCCTGCCTCATGCTGGCCGTTGGTACGAAACCAATTTCTCCCCTACGTGTGGCTATTTCTTTCCCCATGCTTGATCCCTTTCAGACACAGTTTAATACCATGGGGTTTCCTTCACAATGTAGCTTTGGTCCTGATCTTCTTCATTGCTTTCAATCGCCTCTCCCAATTACGCTGATGTTACCTATAGCACTGGTGGGTATGCACATGCTCAATGGTTATCAGTCCTGAGACA…
TRINITY_DN63_c3_g2	GGACGGTGGTGAGTGAGTGGAGTCGGCTGCCGTCGGTGGTGGTGTAGAGAAACTTCTGAAGGATTGCACAGAGGAGATGTCAGGGGTAAGTTTTTCACTCAGAGGGTGGTAAGTGAGTGGAATTGGCTGCCGTTGGTGGTGGTAGAGGCGAACTCGCTGGGGTCTTTTAAAAGACTTCTGGATGAGTATATGGAATTTAATGGGATTGGGGGTTATAGATAGGTCTATGGCTTAGTAGGTATAGATGTGCTCGGCGCAACGTGTGGGCCGAAGGGCCTGTTTGTGCTGTAATGTTCTATGTTCTCTAAATGGGGAATCAACAAGCACAAAAAATAAAGG
TRINITY_DN63_c8_g1	ATAAGAGTGTTACTGACTGCCACATCCAAGATGTGTGGGTTAGGTTGATTTGGCCATGCTAAATTGACCCTAGTTTTGTGGAGTTATGGGGATATGTCCAGGGTGGGATTGTGGTTGGTGTAGATGGCCCAAGTGGCCACCTTCCGCCCTGTAGGAATTCTTTGACTGCCAAGTGTCTCCCTGACTTCCTTTCCTCCAGCCATCAAATGAGGAATTGTTAGATTTTCTTGGATGTTAAGACTAAGAATCCAATTGTCAACCTTTACTGAACTTGCATCAAGGCTCACACTCTGAACTCCTCTTTCTGTAATTTCTCCCCTATCCCCCACCTTGTGTTCTCTCCCAGCTGATTTTCCACATAAGCCCCATTCTCTTCCCATTCCCATTGCAATGCTGAAC…
TRINITY_DN63_c10_g1	CCCTTCTTTTTTTTTTGGGGGGGGGGGGGGGGGTTGCGGCAACGCATCGCTTTTCCTTTTGGGTGGGGGGGTGGGGTTGTGGTGTGGAAGAAGTGGCCAGGGTTCCCTGGGAATGCGACACCCCTCCCCACCCACCCGTCCACGGCAACACCAATAGGAGACACCTTAGGGGGCAAGACCCCTCCCCCACTCCCCTGGTACTCGGGCTGTGTGCGCGGCGAGAAGGGGAGATCGTAGGCCATAAGGTACAGGAGCAGAATCAGGCCATTCGGCCCGTCAGTCGTGGGCCTGATCAGGAGTCTATCTGTCTCTGTCTGCAGGTGGCACAGTGGGGGTTCGCGCCGCTGCCTCACGGCACCAGGGAGCCGGGTTCGATTCCCAGCCTTGGGTCACTGTC
TRINITY_DN63_c12_g1	CTGGTGTCTGTGGGGGTTTGCGCGTTCTCCCCGTGCTTGCGTGGGTTTTCTCCCACACCCCAGGGATGTGCTCTTAGGCTGATTGGTGTACCAAATTGACACTATTCTCCCCTGAATCTGGCTACATTAGGGGTTCCACTCACATACACACAGGGCAGGGTAGGTGTAGGAAGATGTGGCGGCGCGGGCTTGTTGGGCCGAAGGGCCTGTTTCCCGTGCTGGGTTGTTGGTTGTTCTTTGT
TRINITY_DN63_c14_g1	CCAGATTTCTTGCTACGTACATGTACTGTCTAACAGGTTAGGTTGATTGGCCATGCTAAATTGCCCCTTAATGTCAGGGGAACCAGCAGGGTAAATACGTGGGGTAACAGGGCCTGAGTGGGATTGTTGGTGCAAGCTCGATGGGCCAAATGGCCTCCTTCTGCACTGTAGGGTATCTATGAACAGTGTAGCCCTGGGTGTTTTGTT
TRINITY_DN8_c1_g1	AGTCCCCCTGACCGTAAGAGGCAATTTTAACATGGTTAATCAACCTAACCCGCACATCTTTGGAGTGTCAGAGGAACACGCAGTACCTGGAGGAAACCCATGCAGACACAGGAAGAATGTCCAAACTTCACACAGACAGTGACCCAAGCTGAGAATGGAACCCAGATCCCTGTTGCTTAGAGGCAGCAGTGCTAACCACTGTCGCCATGCTATCCCAACAGTGGAGTGGGAACTGAAGACTTGGCTATGTTTGAGCTTATTTCCCTTGAAGCAAAGGTGAGCATTCTATTTGGCCATCCAATTACCTGCTGCACCTGCCTGTCAACCCATTCTCATTCATATATAAGGACATCCCCTACATCATAGCCTAGCTCTCTGTACTCAATGTTGGGGGGAGAT…
TRINITY_DN8_c1_g2	CAATCCACCTAACCAGCACATCTTTTCTCCAGAGCACCTGGAGGAGGCCCACGCAGACATGGGGAGAATGTGCAGACCAACGCAGACAGTGACCCAAGCTGAGAATTGAACCTGGGCCCCCAGCGCTGTGAGACAGCAGTCCTAACCACTGTGTGTTTATAGACGAAAAGGGATTGGTATAGGCTAGTGGGTCATTGTTGGGGGCGTTTAAGAGATCCATGGATAGGTTTATGGATGAAAAGGGATTGGTTTAGGCTAGTGGGTCATTGGGGACAGAACGGAGTTTATGGATGGAAAGGGATTGGTTTAGGTTAGAGGGTCATTGTTTTTTTTTGTAACTGGTCGGCGCAACATCGTGGGCCGAAGGGCCTGTTCTGCGCTGTAATGTTCTATGTTCTA…
TRINITY_DN8_c2_g1	AACTCATTGAGTTACACTGGGTCCCAGTGAAACAACACACAAATAAAGTATAAATTAAAGTTAATTAGTCACAAGTCGGCTTACATTAACACTGCAATTAAGTTATTGTGAAATTCCCCTAGCCCTATTCCCCTCTCTCTCATCCTGTGCTAGCTGACCCACATTGATCAAGCTAAATTGCTGGAATACTGTATGGAATGAAAATTTATATTTGTGTGTATATATATATTATATATATATAAAAGTTCTGTAACATCATTTTCCTCTGCATTTGTGAAAATCTGTCAGTAGGTGGTTAATGAACTGCAGAATGTTGATTTGTCACAAACCTTGATAATGTCGAGCTGCTGTTGTGTAAACCCTTCTTGTTATCCATCAGTGTTCCAAACATTTCTGTCT…
TRINITY_DN8_c3_g1	TCCACAGATTCACATCCCTTTGGGAAAAGTAATTTCCCCTCAACTCTGTTTTAAATTTGCTACCCCTTATCCTAAGACCTCTCGTCCTAGGATGCCCCTCAAGAGGGAGCACCCGCTCCACGTCCACTTTATCCACACTTTTTATCATCTTGTATATTTGATCTCCCCTCATTCTTCTAAATTCCAGAGAGTATAGGCCTAAACTGTTCAATCTCTCTTTGTACGACAAACCCCTCACCTGTGGAATCAATCTAGTGATCGTAAGATTCATAGGATTGTACAGCAAGAGGCTATTCAGCCCATTGAGCTTGTGGAAGCTCATGAAAAGAGCTATCCATTTAGTCCCAATAAATCTGCTCTTTCCCCATAAATTTGTTACCTTTTAAAGCAAACTCCCCA…
TRINITY_DN8_c4_g1	GCTAACCATTGTGCCATCGTGCTGCTCCCATAATAACAAGGACAGCAGATTTCCTTCCCTAACGGGCATTAGTGAACTGAATTGGTTTTTACGACAATCAACAATGGTTTCATGGTCATCATTAGACTTTTAATTCCAGATTTTTATTGAATTCAAATTTCACCATGTGCTGTAGTGGGATTTGAACCCACATCCCCAGACCGTTACCCTGGGTCACTGGATTACCAGTTGAGCAACAATATCACTATGCCACTGCCTCCCAAATTGACTTAGGCATTTTCATCACATTTATATGCATGGCATTGGCCACAATCTTGTTGAGCACTTGTTAGCTGGAGAGTTAAGAACGGATCTGCTTTGCCTCCTTTCCAGAAGACCCACTGAACCACAAGTAAGACC…
TRINITY_DN8_c5_g1	CTCGATGTACCCAGAGTGTGGCGACTGGGGGGATTTTCATAGTAACTTCATTGCAGTGTTAATGTAAGCCTACTCGTGACACTTTAAAATAAAAGTGAGTTAAATCTCCTCTGAAACTGAAGAGCGAAGAATTTCTGAAAATAATAGATGAAATATCCCTTGCTTTTACAGCTCAATGTAATTTCAAGCCCCACTATATTCTGCTCACACGCTATAAAAATCTTTCAGTTGTTCTGTCCTTAATGCCAAATTGAAACTACCATTGGCAATTTCTTTTATTGTTAAGTACCTTTAGGCATTACTGAACAAACTGAATACGTGGAAAGTGAGTTCATCATTTCCTTTATTCTTTAATGATTAAAATCAATGTTATGAGTTTAAGAAACAAATTAAATATTT…
TRINITY_DN8_c6_g1	TATCTAAATCCTTCTGTAGACTCTCCACACCCTCCGCACAATTTGCCTTTCCCCCAATCTTGGTGTCATCAGCAAATTTCGACACCCTGCACTCGGTTCCCTCCTCCAGATCATCTATATAAATGGTAAATAGCTGAGGCCCCAGCACCGACCCCTGGGCCCTGGGGCACTCCACTAGTCACTATCCGCCAATCCGAATAACACCCGGCACTCCACTAGTCACCAACTCACTCCACTAGTCACCATCCGCCAATCCTGCCAATCTCGCCAATCCGAGAATAGCAAATAGCACTCCCGTTGACCCCCATCCATTGACCCCCACTCCATCTCTGCCTCCTATTTGACAACTAATCCTCTATCCACACTGCTAACACCCAACACCCTACCCCCAACTCCATG…
TRINITY_DN8_c9_g1	TTCCCTTGTGACAATGGTCGTCATTAGATTTTTAATTCTAATGGTTTTTTTATTGAATTCAAATTTCACCGTCTGCCGTGGTGGGATTTGAACCCGGGTCCCCAGAGTATTACCCCGGCATCTCTGGATTACTAGTCCAACAACAATATCACTAGGCCGCCACCTTCCCTGTATTGCAGTATCGAAAACAGACAAAGCTGTTGTTTAGGCCCACAGCCTGTGCCTGGACACTCAACATGCCTACCCAGAAGGACAATGGAAGCTGAGTCAGGGATAACTTTCAAAGGGGAATGGGGCAAATGCAAGAAAAGTAAAAAAAATCTGCTGGGCAAATGAATAGAGAAAGAAAAACAAGGAGGATGGGTAATAAGAACATAAGAACTAGGAGCAGGAGTAGGC…
TRINITY_DN8_c10_g1	ATCTGCTGCGCTTGTCCCTCTAGATGGTAGTGATTGTGGGTTTGGAAGGTGCTGCCTAAGGAGCCTTGGTGAGTTGCTGTAGTGCATCTTGTAGTTGGCACACATGGCTGCATCTGTTTGTTGTTGCTGGAAGGAGTGAATGTTTGTGGAAGGAGTAGCAACCAAGCAGGCTGCTTTGTCCTGGATGATGTACTTCGGATATGCTCTTGTCAATGTCCTGAATGACTGAAGCATAACCTCCCTACTTTTGTATTCAATCCCTGTCACAATAAACAAAAACATTCTATTCACTTTC
TRINITY_DN8_c11_g1	GGGGAGGGGACAGACAGAAGGCCACTGAGAAGGGGGAGGGGTGGGCTTGTTTCAAGGTCAAACCAAATAAACAAACTCAAGTTAAATCAGGACAAACTAAAAGGGGCAGCTCCCCAAAAGGAAGAGGAACAGCGTGAACAAAATAGAGGTACAAAGGAAACTTGAAAACATCAAATTAAAATGTGATTATTAGGGTCAATAATGCACCCCAGCCCCTGCAGTGCCCAACAGGCGCAGAAGGCGTCAGCTGTACACGTGGACCCCGCATGCTCCCTCTCCAGGGACACCTGGCTGTGAATGTAGCCATGGTAGAGGGGCAAACAGTCAGGATGGACGGCCCCCTCGATCGCCCACTGCCTGGACCTGTAAATGGCGCGTTACGCCAGGCCCAGGAGCAGG…
TRINITY_DN8_c13_g1	TGGTAATCAGTAGGTTCTTAATTCCAGATATTTTTTAATTGAATTCAAATTCCACCATCTGCCATGGTGGGATTTGAACCCGGGTCCCTAGAACATCAGCTGAGTTTCTGAATTAATAGCCCTGCGATAATATCACTAGGCCAACACCTTGCCTATATAATGTTTAAATTACCTACTGGGGCCAAAAATCTTTGGGTGCAATAGTACTTCCTGATATTATAAACATTCAAGTCTTCAATTTGAGTAGTTACAGATGCACCACATAATGCAGCCCATTCGTACAAGGATGAAGTTTCCTGGACAACATTCAGCTGGTGGGAATTGGCTAGGGTGTGGGTATCGTACCCAGTTTTAGGGCATGAAGTAACTTGTTGTTGACACACGAGTCTGCTGAATTCA…
TRINITY_DN8_c15_g2	GAGGGGGAAAGTTGACTGGGTGATTTAACCTGAGGATTATCACACCTTCACCTGACGAGGGGGCAGACCCTGGAAGCTTGCTAGTTTGCTATCAAATAAATCGGTTGGACTTAAACCTGGTGTTGTCAGACTTCTTACTGTGTTTACCCCAGTCCAACGCCGGCATCTCTACATCACAGTTATGCCTATGCAGACCTATAATGTGAGGAGAGATCTGATTCTGTTGTCAACCAGCCATTCCAGCAGATTTCATGCATGTTTCACAAACTTGGTCTACAAATGTCCACTGAATACTGGTACTAATCATCCTCAATTGAATATGAGTAAGCAGTACGTCTCACTAGCTTTATTGAAGGATCAGGCAACTAACTTGCACTTGGGGTGCTTTTGATTTACTTT…
TRINITY_DN8_c19_g1	CCACGTTGAAGTCCATGTACAAACTCCACACAGAGTGACCCACACTCTGGCGCTTGTTCGGGTACACTGATGGGGAATTTAGCATGGCCAATGCACCCTAACCAGCACGTCTTTCAGACTGTGGAGGAGGCTGGAGCACCCGGAGGAAACCCATGCAGATACCGCACCCGGAGGAAACCTATGCAGATATGAAGAGAACATGCAGACTCTACATAGACAATGATCCAAGCCAGGAGTTGAACCTGGGTCCCTGGTGTTGTGAGGCAGCAGCAGTGCTAACCACTTGTGCCATTGAACCTGGGTCCCTAGCGCTGGGTGGCACTAACCACTGTGCCACCCGGAGATGTACAAACTGCTAACAATTTCAAGATACCCAAAGGACAACAATTAGATCAATAG…
TRINITY_DN8_c22_g1	CTGGCCAAGGGCATCACATATGAACATAAGAAATAGGAGCAGCAGTAGGCCATCTAGCCCCGAGGAATCCCACGCAGACACATAGGAACATAGGAGATAGGAGCAGGAGTAGGCCGTCTGGCCCTTCGAGCCTGCCCCACCATTCAATAAGATCATGGCTGATTTGTCGTGGCTCAGTTCCACATTCCCACCCTCTCCCCATGATCCTTAATCCCCTCTCTTATCAAAAACCCATCAACCCGCTTCTTGAAAATATTTAGCGAGG
TRINITY_DN8_c23_g1	GGAAATTGGAGCACCCGCAGGAAACCCATGCAGCCTGCACACAGACAGTGACCCAAGCCAGGCATCGAACCCCGGTTCCTGGCGCTGTGAGGAACCAATATTTTGAACAACTCTCAATTATTTTCCCATTTGGTGAAACCAAAAATATCGATCGGACTACAGTTCCCGTAACCTCTCATATTCATCCTGGCACTAGGGTTAATTTAGCATGGCTGATTAACATAGCCTGCACACCTTTTGACTATGGGAGGTAATCTGGAGCACCCGGAAGAAACCCATGCCGGCACGGTGAGAACATGCAGACTCAACACAGATGGTGAGCCGAGACGGGGACACAGAGGATGGGATTTTATGGCCTCGCTCATCCCGAAACTGTAAAATCCCGCCCGTGGTCAACAG…
TRINITY_DN8_c25_g1	ATGCACAAGGACCCCGAGGTCCCTCTGCACCGTCGCCTGCTGCAGTTTTTCGCCATGTAAGTAAGGTCCCTCTGCACTGTAGCATACTGCAGCTTTTCGCCATGTAAGTAGGGTACCTCTGCACCATTGCCTGCTGCAGTTTTTCTCCAAAGGACCCCGAGGTCCTGCTGCACTGTCGCCTGCTGCAGTTTTTCACCCTAGCGTAAGTAATAATCCTTCCTACCATTATTCCTACCAAAGTGGACCACCTCACACTTGCCAACATTAAATTCCATTTGCCATTTCCTGGCCCATTCGCCCAACCTATCTAGATCCTTCTGCAGACTCTCCACACCCTCCGCGCAATTAGCCTTTCCCCCAATCTTGGTGTCATATTTCCTGGCCCATTTGCCCAGCCTA…
TRINITY_DN8_c28_g1	CCAGCGTTGGACTGGGGTAAATACTGTAAGAAGTCTCACAACACCAGGTTCAAGTCCAACAGGTTTATTTGGTAGTAAACGCCACTAGCTTTCAGAACAGTGTTTACTACCAAATAAACCTTTTGGCAATGGATCACACGGACTGGTGTCAAGCTTTCAACATGAGATGTGCAAGAAATATGAATAGAAAGATCAGGATTGGAGGATAGATCAGTACCAGAATGTTTCAGCCCAGAGAAAAGGCATTGGCCAGAGTTGTGATTCAGTACAAATCTGGCACCACTACTGAAAATATCCACTGAATAAGAAACAGGTGGACGTTAGTACCTATAGGGTACAGCTATGGCCCTTCAGCCCATCCAGATAGGATTATTAATGGTAAATGCATCTCCCCACCTA…
TRINITY_DN8_c30_g1	TTCCACTATTCAGTATATGAGAGGTTGCACTGCAGACAGTGACCCAAGTCGAGAATTGAACTCGGATCCTGGCGCTGTGAGGCAGCAGTGCGAACCACTGTGTTACCATGTCGCCCTACTGATCTTGGCCTGAATTCTGCTATTCAGTATGTGAAAGGTTGCAGCAATGAACATCTCCAATTAGAAAGTGTTGATTAATCCTTGCTGAGAATTCTTACTCACTTGCACATTACACACAGTGATACCACCACTGTCCAACAGAAAGAAGGGGAATGGGAACTGGTGGAGAATCAAAAGTCTCCAAATGTCACCCATCCCATCTGGAACAGAAATTCCCTCAGCACAGGAATGGCATCTTTTAAGGTCAAACCACATAAACAAATTCAAGTTAAATCAGGA…
TRINITY_DN8_c31_g1	GGTCACCTAGTTACAGGCTTTTACTTCAATATTGTTATTGAATTCAAATTTCACCATCTGCCATGGTGGGATTCAAACCAGGGTCCCCAGAGCATTACTCTGGGTCACTAGTCCAGTGACAACACCACCACTTCCCCATACTACAGGACCATCTCCCCATATTATAGAAGGATGGGCAGAGAGGAAGAGTAGAAGATCCACAGTTTCAAAGTGTTGGGTAAGGGGAATGTAAGTGGGAACCCTAATAGGTTAGTAAGATTGTTAAACCATTAGACATTAAGGTACTGACAGAACTACCAGCATTAAGTTAAATGACACTTAGAAGCTAACAAGAGAATAGTGTACACATGTGAATGCAGGAAGAGTAGAAGATCCACAGT
TRINITY_DN8_c33_g1	CTTTGATCTCTGCAGCTTTCTGTTAGAGAATTCCACAGATTCACCACCCTCTGAGTGAAGAAGTTTCTCCTTAGCTCAGTCCTAAATGTCCCACTCTCTATCCTGAAACTGTGACCCATTTTCTAGACACCCCCAGTCAGAAAACATCTCTTTCCAGTCTGTCCAACCCTGTCAGAATTTTATGTTTCAATTAGATCTCTTCTCATTCTTCTGAGTTCCAGTGAATACAGGCCCAGTCTCCTCTTGTACGACAATCCTACCATCCCAAGAATCAATCTGGTGAATCTTTGCTGTGCTCTTCCTATGGCAAGAATGTCCTCTCTTAAAGATACTAAAACTGTGCACAATAATCGTGTGGTCTCACCAAGGCCCCTGTACAGCTGCAGTATGCCATTCTTG…
TRINITY_DN8_c44_g1	ATCTGTAACCCCCGTGACTTGCCTGGGTTTGCAAAATCTCACTTACTGTACTGTCTGGAGACAATACACATCTCTGTAAACTGTGATCAGTGCTCCTTCCACTCACATTGTCAGCCACTTCAGGTCTTGAACAGCAGGTTAGGTGTAGGGATTCGCATTCTAATCAGCAACTGTCTGTGCTTTGTTTGCTCTGTCTGTCTGAGGCCAGAACTCTCCATTCACTTGACAAAGAGGGTAACCTCGAA
TRINITY_DN8_c47_g1	ATTGAGCCTGCACTGACAACAATCCCATCTTATCCCCATTATCCCACATACTTACCCTGCTAATCCCCATCCTGACACTAAGGGACAATTTACCATAGCCAATCAATCTGCACATCTTTTGAGTATGGGAGGAGACCAGAGCACCCGACAGAAACCAACACAGACACGGAGAATAACTGGTGTTTGCAGAGTCACTCGAGGCCAGAATGGAACCCAGGTCCCTGAGGCTGTGAGGCAGCAGTGCTAACCACTGTGATTCCTAAAATGGTGTGGTGGTGGTATTATGCACGTGCCTCGATCCTGAACATCTAACCAACCTTTCAAATGCTCTGGGTTCTCTCTCACCTGGGTTTGGATAGGTGACTGATGTGGCTTCAAACCCCCATTATTTCAGCTTTT…
TRINITY_DN8_c48_g1	CCACATCCCATAAAATGAATTTTTGAAAAAATCAGTAATAAACATTCTGATGCAGCTGAGATAGTTCAGCCATAACTCAGTTAGCATGCCTGTAGTCTGAATGCTCAGCCACTTATGCCTACTGCATCATCACTGATATGTGGGCCACTGCCACCCAGCAGTTAACACCTGGTCTGCTGAAGTCCAGATTCAGTGACAGTCATGGGCATTCGGCCTCTGATCTTCAGGTAAATGTTCTCCAAGGCGGCCTTCACTACACACGAC
TRINITY_DN71_c1_g1	GTGGAGTTTGCACATTCTCCCTGAGACTGCATGGGTTTCCTGCAGGTGCTCCAGTTTCCTCCCACAGTCCAAAGATATGCAGATTAGGTTGACTGGCCATCATAAATTGCCACTTAGTATTCGAAGATATGCAGGTTAGGGGGATTATTGGAATAAATTAAGTTATGGGAATAGGGCCTGGTTAAAATGCTCTCTTCGCGAGTTGGTGCAGGCACAATGGGTCGAATAGCTTCCTTCTGCACTGCAGGGAATCAATGATGCTGATGATAAACTTAAACTCAAGGACCTTTTTGTGCTTCAACCTGCCCAAAAGTAAAAGCTTACCATGTACCAGAACCATATTCCACACTTCTGAGATGTTACCTGTTGATGTACTACAGAGTAACACAAAGTGACCAC…
TRINITY_DN71_c2_g2	ACAGCCCGCCCCACCTCCACCTCCACCTTTCAACTAGCTGATACACAAGCGAGTTCACACTGGGGAGAAGCCGTACACCTGCTCTGTGTGTGGGAAGGGATTTGCTCATTCATCCAATCTGCTAACACACCAGCGAGTTCACAAGTGAGTGGATTTTGCCATCAATTACATCCAGAAAGGAACCATGTTCATTGGGCTCTGTTTCTGCTGATGTATATTCCATCTCAGGGTGGTACGGTAACAGTTGTTAGCACTGCTGCATCACAGCGCTAGGGATCCAAGTTCAATTCCGGCCCTGGAATGACCAGCTAGGGATCCAAGTTCAATTCCAGCCCTGGAATGCCGGATGACTGTCTGCATGTGTTTTCTCCCACAGTCCAAAGATATGTGGGTTAGGTT…
TRINITY_DN71_c3_g1	TCCCACAGCCCAAAGGTATGCAGGTTAGGTTGATTGGCAACGCTAAATTGCCCCTTAGTGTCAGGGGGATTAGCAGGATCAATATGTGGGATTACGGGGATAGGGTGTGGGAGGGATTGTTGTCAGTGTAGACCAAATAGTCACCACATGCACTGTAGGAATTCTACGAATACTCTGGTGCAGTTCCTTTTGCTGCCAGGTATATTTCATGTTAAAAGTTGTAATAGGCTAATACAATTGCTAAGTCTGCTATCGAGTCACACCATCTGCATTGGCTGGTCATCAAACAATGATGAAGATTGTGCACGAGTCTTTAGGACTTACTGATTTGGTGTACTGGTTGGAAAAGACTGAGGCTTATTACCAAACAGCTGAATAAAGCCATGACTTTATTTGCCA…
TRINITY_DN71_c4_g1	GCGCCAGGGACCCAGGTTTGATTCCTGGCTTGGGTCACTGTCTGTGCGGAGTTTGAACGTTCTCCCCATGCCTGCGTGGTTTTCATTCCAAAAATGTTCGGGTTAGATGGATTGGCCATGTTTAAATTGCCCCTTACTGTCAGGGGCACTAGCTAGGGTAAATGCATGAGGTTTTGTGGATAGTCTTGGTGGGATTGTAGTCGGTGCAGACCCAATGGGCTGTATGGCCTCCTTCTACACTGTAGGATTCTATGATTCTAAGGCCAGGATGGAGCTTGGGCCACTGGTGCTATGAC
TRINITY_DN71_c5_g1	TATTGGGGCCCGGATGGGCTGCTCTGTTGGAGAGTTGGTGCAGACTCGATGGGCTGAGTGGCTCCTCCTGCAAAGTAGGGATTCTGTCATTCTTTCCTACTTGTCTATTTATTCAACTTTCTTCTAATAGTTATTTAATTTGTTTCATTGTGCTTTTAGGCAGCACATTTCAGATTGTTATTACTCACTGACTCTGACTGCCTCTCAATCTACACTATTGGCAGCTGGGAGGGCAGCTGAATGAAAAAAGATTAACATTAAAACAATCGCACCAAACTGCTTTACTGGATGGAGGTGTCCAGAGAGCAGAGTCCCGGGAATGTGTGTCAGGGGGTGACCTACAATCGTGGGAATGTGTGTCGGGGGTGACCTACAATCAGTTAGCCTTAGCAGGTGAAG…
TRINITY_DN71_c6_g2	GGTTTTAAAAAAGGGCAGCATAGACAAGTTTGGCCGAGGGGCCCATTTCCATGCTGTAAACCTCTATGACTCTTTGACTATGACTCTTGAGTGGCCTACTTGGGTTCAGCCCCCTTTCAGGAACCTTTTCGATCGAAAGACTAGGAAGAGGCATTGTTAAAAGATTGGAATTAAGTTGTGCAGCATGCACTATCTTATCTGAGGGTTGAGGCACGGAATATATTTGATAGTAGTGTAATCATTGGCCACTTTAACATTTATTTTAATAATAGCTCGCTGACAAGTTTGACTCCGAAATCTGGCAAATGTGACAAGAACAACATTATAAAGCAGTGTCTATTAGTCAGTACAATCTGACTGTGTCAGTTAATGGTTCCTCCATGAGTTTCCTCTTCCTAT…
TRINITY_DN34_c0_g1	CCCCTCATTATTTTATAGACCTCTATAAGATCACCCCTCAGCCTCCTACGCTCCAGAGGAAGAAGTCCCAGTCTATCCAGCCCCTCCTTGTAACTCAAACCATCAAATCCTGGTAGTGGCCTCTTTCCCCCTCCCACTCTTGCACTTACATCCTTGACTTTGTACACACGATAGCTGGTAAGTCAGCATGTTTGCACATTCTCCCAGTGTCTGTGTGGGTTTCCTCCAGCTTTCCCCTCTCAATCCAAAGATGCAGTGGTCAAACGCTTATTTATTAGTCACGAGTAAGGCTTGCATTAACACTGCAATGAAGTTACTGTGAAAATGCTCTAGTGGCTGTTTGGGTCACACTGAG
TRINITY_DN34_c1_g2	GCTTCTTTTGCAAATCACTTTAAAACCGTGGTCTCTTATTTTTGATTCTTTTACGAGCAGGAACAGTTCTCCAAACAGTCCAACACCCTCATGATTTTGAATATTCCCCTCAAATCTCCTCTTAGTCTATTTTTCTCCGAGGAGAACAATCCCAACCTCTCTAATCAATCCTCAAACTGAAGTTCCTCACCCCTGGATTGACTCTTGTAAACCTTTTCTGCACTCTCTCTAATGTCTTCACATCCTTCCTATGGTGTGGCACTCAGAACTGTACACAGTATTCCAGCTGAAGTTTAACTATTGTCTTGTTCAACATAATTTCCTTGCTCATGTACTCTATGTCCCTATTAATAAAGCCTAGAATACTATAGTCG
TRINITY_DN34_c2_g1	AGGGGAATGAGATACTCAAAAGTCTGATCCATAAGAACATAATTTGTAAATTTCCCTTAGAGCCGGGGGGATTAGCAGGGTAAATATGTGGGCTTATGAGGATAGGGCCTGGGTGGGATTATTGTTGGTGTGCAGGCTTGATGGGCCAAATAGCCACCTCCTGCTCTGTAGGGATTCTATGATTCTGTAACTCTAAACTGGCAGGAGTTAGAGATAGGTTAGGCAAATGGAACCTATTAAATGGGATATAATGCAGGAAAGTGAGAGGTTATATACTTTGGTGAGGTTATGAGGATTGGCCCATGTTGTGAGGAATCGTAAATTGGGAATGTCTCTCTGGCATTTAGATGGGTGTAAGATTGTGAGGAGTCCGAACAGAAAGGTCAATAAGGAGATTGC…
TRINITY_DN34_c7_g1	ATTGAGTGAAGAAGTTCCTCCTCAACTCCGTTCTAAACCGCCTCCCTTTTATCTTGAGGCTGTGTCCCCTAGTCCTACTATCTTTTTTGAGCGGGAAGAGTCTCTCCACCTCTATCCTATCCATCCCATTCATCATCTGATATGTCTCAATGAGATCTCCCCTCATTCTTCCAAATGCTAACGAGTTTATTCAGCCTAGTTTATTCAGCCTCTCCTCATAGCTCAACCTCCTCAACTCCGGTATCAGCCTAGTAACGCCCCCAAACTCATCTCCGGTATCAGCCTATTGAACCTCCTCTGCACTCCCTCCAAGGCCAAAATATCCTTGTGCAAGTGCGTCCAAGGCCAAAATATCCTTGCGCAAGTGCAAAACCTCCTCTGCTCTCCCTCCAAGGCCAA…
TRINITY_DN34_c12_g1	AATAGATTGGGATTGTTGTTGGTACAAGCTTGATGGGCCAAATGGCCTCCTTCTGCACCGGAGGGCTTCTATGACTCTACAGCAATCCACTCTTAAAATGCCCTCTGAAATGTCCAACAAGCCACTCAGCTCAATGCACCAGGGTAATCAGGATGGGCACCAAATGTTGGCCTTTGCCATTGGCACCCACATTCCATCAAAGAATATTTTTTTAATTATTCCCCTCGAGTTTTTGTTAACCTTTGTTGCTGTGTTTAACATTTGTGAATCATTGTGAACCCACATTGCTCTTCCACCTTATCCATAGGGGACACAGGAAATAGGAGTGGGCCATTTGGCCCTTCGAGCCTGCTTCACCATTCATTTTGATCATGGCTGATCATCCAACCAGTGACCA
TRINITY_DN59_c0_g1	CCAGTGCTGTTCCACCCTATACAGCCTGGCTGGTGGCCCAGTGCTGTTCCACCCTATACAGCCTGGCTGGTATCACATGGAGTTTGCTCCGGTGTTTATAGGTGTGGAATCAGAATTAAAACTCTGTTTTTGCCACAGCCCAATCAATTGCAGCTTTTTTATTTTTAAAAAAATACAACAATGTACAGGATGAAGTTTAATTTAAACACAGGCAAACTCTTTCAAATAATATCCAGGACACTGTTGGATAGGTTTTACGAATTCGGAATTGTGGTGTTGAACCCTGCCAGTTCACAGAGCAGTGTTGCAGGACATGGAGATGGAGGGAATAAAAGGGAACTCGACCAGACTTTTCATTAAAGAATCCGTAAAATCTATCCTGGTCTGATGTGACAGATT…
TRINITY_DN59_c0_g2	AGTCATATTCAACTCAAAATGATAGCTTTGTTTTCCTCTCCACAGATGCTGCCAGACCCACTGAGCAATTCCAACATTTTGTACTTTCATTTCAAGTTCCCAGCATGGCAGTATTTTGCCTTTTGTAAGTAGGGGTATGTTACCAGGCTAACAAACATGGCTAGGTACTGCGGCTACTAGAAATCTGGAATGAAACAGAAAATATTTTTTCAGCTTGTCAGGTAGCAGCTGTGAAGATAGCAAACAAAAGAGAGTTAATTGGGCCTATAGCCTGGAAAGTTAACTCCATTTTTGTGTCTCCATATATGCTGGAAATTATCAGCATTTTCTGTGTTGGCTTGGTATCCCAAGCATTTGAAAATCAGTATTCCAACCAGATGTGAGATGAAGTGAGACAGT…
TRINITY_DN59_c1_g1	CCAGAGAGTGACCCAAACCGGGAATCGAACTTGGGTCCCTGGAGCTGTGAGGCAGCAATGCTAACCATCGTGCCACCCCAGTTGTTTGATTCATTTTTCATAAGAACATAAGAACATAAGAAATAGGAGTAGGAGTAGGCCATCTGGCCCTTCGAGCCTGCCCCGCCATTCAATAAGATCATGGCTGATCTTTTTCCCTTTCTGAAAGGTAAATACTGAAGCAAATCAATATGCTTGACGACATTGTAGAAGCTGTTGAGAGGGTACGGAGGAGATTTACGGGGATGTTGCCTGGACTGGTATTGAGAGGGTACAGAGGAGATTTACAAGGATGTTGTCTGGACTGGG
TRINITY_DN59_c3_g1	CACGGACAGTCACCCAGGGCTGGAGTCGAGCCTGGATCCCTGATGCTGTGGGGCAGCAGTGCTAACCACTGTGCCACCATGCTTGCTCCCCAGTTCAGACCAGGTTCAGATTGCAGCATAAGTCATCTGAATGGAAGTCAATTGACTCCTGGCCAAGCAGGTCTCTGACCACAACACTTTCCTAGCTGGTTTTACAACATCTGTCTACTCCAATCGGTGTCTGGTCATTCTGGTCCTCAGTCCTGTGCTCTGGAAAACCTGGAATTTCTTGGATAATACGTGTGTAAATTACACCGGAATTCACACCAGTCATTGTGCCAATCTTGCCAATGGGTGGTTGTGTGCCAACTTTTCCACCGCGTCCTTTCACCTGATTGATACAATGGAAATGCAAACTCA…
TRINITY_DN59_c4_g1	CTCAGTAGGTCTGGAACGTTTAACCCAAAGAGAAAATGCTGGAAAATCTCAGCGGGTCTGGCAGCATCTGTAAGGAGAGAGAAAAGAAGAGCTGATGTTCTAAACCCAGGCCACCCTTTTGTCAAAGCTGTGAGTTTTGCATGTGTTTTCAGCATTGCTGCCCTGTCCAAGGTCATTCAGCAACTTTCTCTTTCGCTCTCTGATGTAACTCGCACTCAGACGACTCATTAAAAGCCTGTTTTCAACTTGAAAAAAAAAAAAAAAAAAAAAAA
TRINITY_DN59_c6_g1	CGCCTCTCAATTTACCCCCATTCAAGTAATGATCTGTCTTCCTATTATTGCTACCAAAGTGGATAATTTCACATTTATCCACTTTATACTGCATTTGCCATGGATATGCTCACACACTGAGCCTGTCCAAATCACGCTGAAAAATCTTGACCTTGCCAACAATACCCACATCCCATGAAATAATAAAGAAAAATGAGTATGATTTTGTTGGGATCAGTATCTCTGCATGTTCCCTGATGTTGTCCTGAGATCTGTATCTGTCCTTTATGTCCCCATTACAATGTCCTGTGCCTTTCTGTTCCTGTAATACTATCTGTTGGAGCAGATAGCACCTCCATACTTGCATTACCCTCCATTGTACCTCTTCACACTGATCTAAGTGATCTATGTGCAATCTCT…
TRINITY_DN59_c7_g1	CTTCATCCTTACAGAAATGTGTGGGTCCTGAATCCCTGTCAACTTACACTTGAAAGCCTCCCGTATGCCAGATGTTGATTTGCCCTCAAACATCTGTCCCCATTCTACATTCTTTAGTTCCTGCCTAATATTCTTGTAGTTAATCTTTCCCCAGTTTGGCACCTTAAATTGAGGATTACACTTTTCTTTATCCATCAGTACCTTAAAAGATTACTGAATTGTGGTCACTGTTCCCAAACTGCTCTTTTACTGAAACCTGGACCACCTAGCCGGACTCATTTTCCAACACCAGGTCCGATGTGACCCTTCCCCGGTTAGACTATCTACATATTGTTTCAAGAAGTCCTCCTGGATGCTTCTTACAAACTCTGCCCCATCTATGCCCCCAGTGCTAATCAA…
TRINITY_DN59_c11_g1	AGCCCTCTTGCCATGAATGCTAACACTGCATTTGCCTTCCTTGCCGCCAACTGAATCTGCACATTAACCTTGAAGAGAATCTTGAACAGGGATTCCCAAGTCCCTTTATGTTTCTGATTTCCTAAGCATTTCCCCATTTAGAAAATAGTCTATGCCTCCATTCCTCCTTCCAAAATGCATAACCTCATACTTTTCCACATTGTATTCCATCTGCCAC
TRINITY_DN59_c12_g1	ACTGGGCGGAGAAGTGGCAGATAGACTTCAACCCAGATAAATGTGTAGTCGTCCATTTCGGCAGGTTCAATGGGATGAAGGAGTATAATAACAAGGATAAGACTCTTAGCAGTGTAGAGGATCAGAAGGACCTTGGGGTCTGGCTCCATAGGACTCTTAAATCAGCCTTGCAGAAGAGGATGTGGTTAAGAAGGTGTATGGTGTACTGGCCTTCATCAATCAGGAATTGAGTTTAGAAGTCGGGAGATAATGACGCAGC
TRINITY_DN59_c18_g1	CATCTGGCCCATCGACCTGCATCAATAACAATCACACCCACAATCCCATGTATTTACCCTGCTAATCCCCCAACACTAAGGGGCAATTTTGCCTGGCCAATCACCATAACCAGCACATCTTTGAACCGTGAGAGGGAACTGGGGGACCTGGAGAAAACCCATGCAGACACAGCGAGAACATGCAAATTCCAAACAATCACCTGAGGCCAGAATTGAACTCAATCCCTGGAGCTGTTTGATTTTGGAAGTTCTTGTTTTGTTTGGGCACAATTAACTTGCTAAAATATAGATAGAAATACTTTTGCTATATATTTCATAGGTTGGCTTTGTCTGTGGTGAACTACCAACAGTTCCTTGGAATCTGTGCGTTGCCAGGG
TRINITY_DN59_c19_g1	TACCCCACTAATGTCCCTAACTTCTATACCTTGGGACAATTCACCTAACCTACACATCTTTGGACTATGGGAGGAATCCGGAGCACCCAGTGAAAACCCATGCAGACACGGGGAGAATGTGCAAATTTCATAACAGTTACCCAAGGCTGGAATTGAACTCAGGTCCCTGGCGCTGTGAGGCAGCCATGCTAACCACTGTGCCATTGTTAATCGGAAAGTTTGAGCACACACAGCCTCATAGACTGTACTAGTCCATTAAGAAAGATCTGTCATGAGTATGATATTTAAGTCTAGTAGATATCCCGTTAAATCCTGTTATAGAATATTAGCATTTTAAGGAACAAGTCTGTGGAGATTCACAACACAGAAACCCGGAGTTTAAAATTAATTAATAAATTA…
TRINITY_DN87_c0_g2	GGGAAAGGGTTTACATGACTGATGAAATGGGATGGGAATATTATCAAATAGATCGGTTGGACTAAAACCTGGTGTTGTTAGCCTGTCCTTGTCAGAGGGAAACTTTGGCAATTAGAAACTTAGTCTAATCAGGGTTAGACTGGGAGACTTTCCCAATGTTTCGTAGCCACTGTGTTTCTCTGAGCAATCCCAGGCCCTGACTGTTTATGTCCTGTTCTCTCACTGGTGTGTGTGTGTGGGAGATGTGAAGACCTTGTTTCTGCCTCCCTTTCCCCGAGCTGTGACCCGTGCAATGGTCAATCTTCACTAACTCGTCTACCCAGTGTTGCCACCTACTGGATCCTGAACATATTAGTGTTGAGTCCTTGGGCCAGGCAGCATTAACATTGCTCAAATGGA…
TRINITY_DN87_c1_g1	CTTTTGGCTAAGATCAAGTGTAGTCTGTTAGTGTTGATCAAGTGTAGGGTCAACATGCTGCACTTGGTTGAAGTCATTAGGTTGCAATTCAGCTTCATTTGAAGCAATTTTTTAAAGCGGCATCTCGGCCTTTTGGCTAAGATGCAAATTGGATCAAGCCCTGGAGGAGGAGCTACACCTACTCCAATCAGCTTGGATCATGTAGATCAAGCCCAAGACAGGAGGCGAGAGCCCTTTCTTGTCAGCTTGGATTGGGAATGTCTCACTTGCTGAGACTCTGAATTGGACTTGATTTGATTGAATTGGATAAATAAATTTTTAAAAAATCAGCAGAAGGATTGCAGCTACTAAAAAAACCTGAAATCTCTTTACCAAACAACACAATGACTGAATCGAAGA…
TRINITY_DN87_c1_g5	GCCGAGCAGAAACTGATAAGCCAAGTTCCACACATGAGGACGGCCTCAACCGGGATCTTGGGTTCATGTCATCCCAACTTAAGCTCGATCAAAACAAGATCCAAGCTGACAGGATGAGCATTGCATCCCCTCCCAGGCCTGATCTGACATAAAATGTACACTAATCTATATGTCACACTATCTGTAACCCCCATGACCTGCCTGGGATGGCAAAATCTCACTAACTGTCCTA
TRINITY_DN87_c3_g1	TGTTGCCTCAGAAGGACAGGCGAGAGGTTTATTTGGTGTCACGAGCTTTCGGAGTGCTGCTCCTTCCTCCGGCTGAGCGAGTTCATCCAGCGGCAAGTGCCCCGGCTGATTGAAGGCACCCGCCTGAGGAAGGAGCGGTGACACCATGCGAACCTTGTTGGACTTTAACCTGTTGTGTCGCGAGACTTCTGACTGTGGCCCACCCCAGTCCAACGCCGGCATCTCCACCTCTTAAATGTTGTCTTCCACCACCTTCTTTGGCAGTGTGTTCCAGGCATCCACCACTCTGGGAAAACTCCCCACCCCGGCACATCTCCCTCAAATACCACCCCCCTCCCCTGCTTTGAAGCTGTGCCCCTTTGTAATTGATCCTTGGTTGTGTGGGGAGGGGGGGAAATC…
TRINITY_DN87_c5_g1	GTTACATTGCAACTACACAGGACCTTGGTGAGATCACATTTGGAATATTATGTGCTGTTCCGGTCACCTCACTACGTTGCGCTGCACTATCTTCCTATTTTATAAGTGCGAGGAGATGGAGTTTAACCCTGATAAGTGTGAGGTGATAGTGGAGTCAGACACTTTAGGGACTTTCAAGCGAGATTCATTTTGGTAGGACAAACTTGAATGCGGATTACAGGGTCAATGGCAGGGTTCTGCGGAATGTGGAGGAACAGAGAGATCTTGGGGTTCATATCCACAGATCTCTGAAGGTTGCCACTCAAGTGGATAGAGCCGTGAAGAAGGCTTAAAGTGTGTTAGTGTTTATTAACAGGGGGTTAGAGTTTAAGAGCCGTGGGGTTATACTGCAAGTGTACA…
TRINITY_DN87_c6_g1	TAAAACTCGGCACAACATCAAGGGCCAGAGGGCCTGTACTGCGCTGTACTGTTCTATGTTTCTATGTTAAATGTCTCTTCCATGAGTAATGGTTATGGCACTGAACTTAAAACAAAATTGAATTCAGTAAATTGGTTAGCTCTAGACTTGCATGTGAGTGTCAATGGCTGGGTGACATTCTTTCATACTGATGGTACATTTTCAAAGATGAATATAACATTTTAAAGCTTAATATACATTTTCAAAAATCGGTATAAAGGTTTTTTTTTATTTCTACTGCTGGCGTACATCCACACATTGCCTTGACATGGGTGCAAATAACAACATTTATTCCACATATAGGTGGAAAAAAGTTATAGGGAACACTGAGACCAGGCATTCCTGTTTTGATCTATCTCA…
TRINITY_DN87_c7_g1	TCTCTCTTCCACCTTCTTCCATCGGGAAAAAACATACAAAAGTCCGAGGTCACGTACCAACCAATCACAGACCACACTCAGTAAGGATAGGCAACAGCACCTCCTCTACAATCATCCTCAACACCGGTGCCCCACAAGGTTATGTCCTCAGCCTCTTACTATACTCCTTATACACCTATGACTGTGCGGCTAAATTCCCCTCCAATTCGATTTTCAAGTTTGTTGATAACGCCACTGCAGTGGGTTGGATCTCATCCAATGATGAGACAGAGAAAGATACAAAAGTCTGAGGTCATGTACCAACTTTCCGAGGCAGTGGGAGGTGTAGACGGAGTCATTGGATGGGAGGCTGGTTTGCATGATGGAATGGGCTTCATTCACAACCCTTTTATCTTCCAT…
TRINITY_DN87_c8_g1	GCTTTTTGAGACGTTTCAAGTAAATATGACTGTATACAACCTGAACAAAGTGACTGTTTAAATTGGCAATTTGAAACATTAGGATGAGACTAGAAGATAGTCTCAAAGGGGGGACATGTGAGAGAATTTGCTCTAATGTTTGTAATTGGAATCAATGTTTGTGATTGGAATCAGTATCTTGGAATTGGTGTAATAAAAGAGATTCAAAATGGAAGATGGATTGAAACCAGTATAATCACAGAAGTATGTTAGCTAATTGTAGTATGATAATCAAATAAATATGATTGAATGACATGTAATCAATATAGTTACCCATGTAACCCACCAAAGTTGGTATTGTAAACACTTATTAATAAATATAGACAGTAGCCTCCTGAGGAACACTGGACATTGTCCAGC…
TRINITY_DN87_c9_g1	TTTGTGCGTTTTCCCTGTGCTTGTGTGGGTTTTCTCCAGGTGCTCTGGTTTCCTCCCACAATTCTCCCCGTGCTTGCTTTCTCCGGGTGCTCTGGTTTTCTCCCACACTGTGCAGACACATGGATTTGGGTCGGTGTCTGTGGGAGTTTGCGCATTCTCCCCGTGCTTGCGTGGGTTTTCTCCGGGTGCTCCGGTTTCCTCCCACACCCCAAAGATGTGCTATTAGGCTGATTGGAAGTAATAAATTGTCCCTAAATTAGTTTCCCTCAATGTGGATCCTCAATGTGGATTGCCATTTGCTATAATGCCATAAGCAAAACAATAGATAAGGGTCATGGGTGGAGCTGGTAATAAGGGGATTCAATGTTAAAATGGGGGCGTGGGTTTGGGGGATTGGTA…
TRINITY_DN87_c9_g2	AAAAGGTTCAGAAGAATGGGACGGCGGCGCGGGCTCGTTGGGCCGAAGGGCCTGTTTCCCGTGCTGTGTTGTTCTTTGTTCTTTGTTCTTTGTTAATCCAGTTGCACCAAAACAAATAGTGTTCTGACTGATGTTCACTATTGTTATGCTGTAAATGAGCCTTTTGTAAGCCCTTTTCATTTAAACCTGACAGCCAAATCTTCCATTTCTTTCTTCCTTTTGTGTTAACTTATCTTCCACTTAAATGCATCTTGTGGTAGTGAGTCCCAAATTCTAATCCTGAGATTTGTTACACTTTCCTGATTGACATGTAGGAAATTGGATCCAACTGGAAAAGGCCTGACCATTACCCATCTTGCACGACCTTCCCAGGAGCCAAACAGAAGTCATTTTTACCAT…
TRINITY_DN87_c10_g1	CGCATTCTCCCCGTGCTTGCGTGGTTTTCTCCGAGGTGCTCTGGTTCCCTCCCACACCCCAAAGATGTGCTCTTAGGCTGATTGGTGTAACAAATTGACCCTAAATTATTCTCCCCTTAATCTGATTTCCAATGGGGGTACCATAAGGATAGACATGGGTCAAGGGTGGAGGAGGAAAAACACAATGTTAAGATGGCGGCGCAGGCTTGTTGGGCCGAAGGGCCTG
TRINITY_DN87_c10_g2	TGGTCCCTCCATGCCAGTGCTATAGTTAAGAAAACCCGCCAATGCCTCTACTTTCTCAGAAGATCACCAACAACCTGTCCTGGTTCCCCCCCCCAACGCCACCAGATCACCAACAATGTGTCCTGGTCCCTCCATGCTAATACTATAATTAAAATAGCCCATCAATGCCTCTACTTTCTCAGAAGATAAAGGATCGAGAGTTTCTAGGTGTCCAGATCACCGACACCCTGTCCTGGTCTCCCCCCCCCCACACTATGACTTTCACCAATTTTTACAGCTGTACCATCGAAAGTCAATGGGGGTACCATAAGCACAAACACGGGTCAAGGGTGGAGGAGGAAAAATCACAGTGTTGAAATGGTGGCGCGGGCTCGTTGGTCCGAAGGGCCTGTTTCCCGT…
TRINITY_DN87_c10_g3	CTACATTCTGCACTCTCTCCTCTCTTTCTGTATGAATGATATGCTTTGTCTGTAGAGTGCGCAAGAAACAATACTTTTCACTATTCCTTCATGAACTGGAAGACAGATAAAAGGAGGGCAGAGTGTGTGCTGAAATTAAACTATAACATGTAATTAACTAGCCCAATATTAAAGTGCGCCCATAAAAATAAAATCAGGAGAGAATTGACAACTGTTTTATCTCCTTATCTAGACAATATCCTCCAGATCTATATTTAGGGATAGTATAGACAGAATTTAAATATGTGGCATTTAATCTTCATGAATACGAACAGCCATTTCTAAAATGTTTGATAAATCTACCTACACTTAATAGAAAGTAACATTAAATGAATTTTCATTTACTGAAAGATTCAACAT…
TRINITY_DN87_c11_g1	GCTCTGTCTAATACACAAAAAACACTTTTCCCTGTACCCCAATACATGTGACAATAACAAATCAAATTAGATCAAATCAACGGAATGGGGCAACTAAAGCCATAGAATAGAAAAGCACAGAGAAAGGCCATTCAGGCATCTTGTGTTAACCACTGCATCAGATAGAGTTATTAAACTAGTCCCACTACCTGCTCCTTCCTCCTTCATTTGCAAGGACCTATCCAATTGTTTGTTGCTTGTTGCAATTTACTAGTCTTTCACAAGTCTTTCATTCCAGGTCACAACTCTCAGCAGACCAGAGAGAGACTTGAGAATTCAACACACTAACAGGATCACGAGGATCCGGGGTAATTTATGGATTTCTAAATGATCAATTAGCTAGAGAAAGAATTGTTAAAT…
TRINITY_DN87_c12_g1	TCCATTTTGGTGTTATTCCTATAAAGTGGATGAGTCCATCCCTCTAGCAATGAAGGACAAAATTCCATTTGCCTTCTTAACTACCTGCTGTGCCCACAAACCAACTCCTTGAGATTCCTGCACAAGGATACCCAGGTCCCTCTACACCGCGTTTAAATAATAGTCCATTGTGTTGTTATTCCTAACAAAACGGTTGACCTCACATTTACCAACATTGTACTCCATCTGCCAGACCCTCACCCACTCACTTAGACTATCTATAGCCCTTTGCAGACTTTCAATGTCCTCTGCACACTTTGCCCTGCCACTCATCTTAGTGTCATCTGTGAATTTTGACACACTACACTTGGTCCCCAACTCCAAATCATCTACATAAACAATTGTGGTCCCAACACTGAG…
TRINITY_DN87_c12_g2	CATGCACAAAGACACCTAGGTCCGTCTGCACAGCAATATGCTGCAATTTTTTACCATTTAAATAGTAGTCCAGTTTGCTGTTATTCCTACCAGAATGGATTATGTCACATTTACCAACCTTATTCTCCATTTGCCAGACCCCCGCCCACTCACTTAGGCTGTCTGTATCCCTTTGCAGACTTTCAGTGTCCTCTGCACACTTTGCTCTGTCACTCATCTTAGTGTCATCTGCGAATTTTGACACACTACACCAACTCCAAATCATCTACAAATCGTAAACAATTGCAGTCCCAACACTGATCCCTAATCAAAACAAAATGTGGTTTGCACACGTAATCTAAC
TRINITY_DN87_c14_g1	CTGTTGGGGTACACTGAGAAAGAACTTAGCATGGCCAGTGCACCTAACCAGCATGCCTTTCGTCCAGTTGTTCTTGATTTTGTCCACCAGGAAAAGAACAGCTTCTCCACATTCAAGCCATCAAATCCTTTGAACCTGTTAGATATCTTGTTCAGATTATTTTGCAGCCACCTTTACTGTAGACTAGGGCTTACAAGCCAATTACTTATTCTATGAACCATTCTCTGTTTAAGTGGTATGGTCTCCTTCCTGGACCTGTGTGTCTAAGTGAGATGTAAGTAAGAATTTCGAGGAAAATATTCACCATTTGATTTTTCTGGTACCAAGAAAAGGATGTGAGCTGACTGCTCCTCAGAGATCCTCATCTGAGCAGCAAGGCTTACGGGGTATGTCAAGTGC…
TRINITY_DN87_c15_g1	GGTGGACTCGCGGGCTTTTGGGGTTTGCCCCTTCGTCGGGCGGGTGGAGACTTCTGGCCTCAGACAGAGCATATAACAGCACTCAGCTGTCTGAGGCCAGAACACTCCATTCGCCGGGAACACTCCATTCGCCTAGGCGGGGGGGCGGACCCCGGGGGCTTGTGAGTTCACGGTCGTGTGGGTTGGTTGGACTTTAGCCTGGTGTTGTGAGACTTCTTACTAAAAAAAAAATCGCAAATGGACAGCTGTTAGC
TRINITY_DN87_c17_g1	TGAACACATTGACGAAGGAAGAGCGGTGGACGTCAGCACGGCTTTGTCAAGGGCAGGTAGTGTCTTACGAGCCTAATTGAGTTCTTTGAAAATGTGACTGAACACATTGACGAAGGAAGACCGGTGGATGTGGTTTACATGGACTTCAGCAAGGCGTTTGATAAGGTCCCCCATGCAAGACTTCTTGAGAAGGTGAGAGGGCATGGGATCCAAGGGCCTTTGGCCTTGGTGGGATCCAAGGGGCTTTGGCCTTATGGATCCAGAACTGGCTTGCCTGTTGTAAGTGGATTGTCCAGGATAAATTGTCCCTTAGTGTCCAAAGATGTGCAAGTTGGGTCAGAAGGCAGAGAGTGGTTGTGGATGGGTCTTTTTCTGCATGGAGGTCGGTCACCAGTGGAG…
TRINITY_DN87_c18_g1	ATGTGTCAGATTCCTATTTATTGAATATAGCTCAGCCTTCAACACTATTATTCCCACCAAACTCATCTCCAAACTCCATGGCCTGGGCCTCGGTTCCTCCCTCTGTGACTGGATCCTGAACTTCCTAACTGAGCTTTACTCTGTATCTAACCCCATGCTGTACCTGTCCTGGGAGTGTTTGATGAGGGACAGTGTAGAGGGAGCTTTACTCTGTATCTAACCCCGTGCTGTACCTGTCCTGGGAGTGTTTGATGGGGGGACAGTGTAGAGGGAGCTTTATTCTATATCTAACCCTGTGCTGTACCTGTCCTGGGAGTGTTTGATGGGGACAGTATAGAGGGAGATTTACTCTGTATCTAACCCCGTGCTTGAATATTTACTTGTGCCTGAAGTCAATTA…
TRINITY_DN87_c29_g1	TGCATGGGGTTATGGGGATAGGGCCTGTTTGGGATTGTGGTCAGTGCAGACTCGCTGGGCCAATGGCCTCCTTCCACACTGTAGGATTATATGAAAATGCTGACAAGGGGAGGATGGATCTCTGTTTAAGGATAGAATGCACGTTACATTCAGTACGTGCTGCCACTAAAAAGTCCAAGTCCAAATAGTATGGCCCCCCTGCAGGTCAGAGGCTACAAGGCGAGGTGGAATATTCATCAGCCAGTGAGCTGAGGCTTGGTGGACCTCATAAGCTAGCTAAAGAAGTGCGTGTCAGCTGCAAACTCCAGCTACTGCGGGTGTTAGGATCTCAAAATTCTCCAGTCAACTTTCTCAAGGGCGAGGGCTTGTACAAGACTCTCTAGCTCCAGCCGTATACCC…
TRINITY_DN87_c34_g1	TTAGTCCCCAACTTCAAATCATCTATGTAAATCATAAACAATTGTCCCAACACTGATCCCTGAGGCACATCACGAGTCACTGATCCCAACCAGAAAAACACCCAGTTACCCCCACTCTTTGCTTTCTGTGAATTAAGCAATCCTCTATCCATGCTAATACATTACCTGTAACATCATGCACCTTCCTTACGTAACAGTCTTT
TRINITY_DN87_c47_g1	GGAATCATAGAACCTCCGCAGTGTAGAAGGAGGCCATTCGACCCATCGAGCCTGCACCAACAACAATCCCGGGCCCTATCCCTGTAATCCCACATTTTATATTGTTAGTCCCGTTGACACTAAAGGCAATTTAGCATGGCCAATCAACCTAACTCGCACATCTTTGGACTGCGGGAGCAAACTGGAGCACCCGGAGGAAACCCAC
TRINITY_DN87_c52_g1	CAGACTTTTGAATGGACCTATCTCACATTAAGTTGATCTTTCTCTTCACCCTGTTGATAACTGCAACACTATATTCTGCACTCTCCTTCTGTATGAAGAGTAGGCTTTGTCTGAATAGCGCGCAAGAAATAATACCTTTCATTGTATCCCAATACATGAGACAATAATAAACCAGTTCAATTCAATGATGGCTGATCGCCTGTCTCAACATTATTTTCTCACACTGTTCCCATATCCACTGACGTAACAAAGTTTAAAGTTTATTTATTAGTCACACATAGGTCGACATTAACACTAAATGAAGTCACTGTG
TRINITY_DN87_c62_g1	TGTGAAAGGGCCTGTGTAAAATACACTGTCAGAAAGTCAGTGCAGACCTAATGGGCTGAATGGCCTCCTTCTGGTAGCATTTTTGGCTCCTGAATTGAAAGGTTGTGAGTTCAAGGCCCACTATGGGGCTTGAGCACACGTAAACCAGGGCAGTACTGGGTGTTGTTGCAATATCTGAGATGTTGTTATTTGGATAAGCTGTTTAATTGAGGACCTATTCTAGCGTACACAAGATCCCATCCTGCTTTTCAATAGAGCAGTTCCACCAGTGTGATGACCAGAATTCAGTCAAGCAACAACTCTAGAATCACTAACTGGCCATTCACCTTGCTAATAAAAACAAAATGCTAGAATTAGCCAGCAGGTCTGGCAGCATCCGTTAGGAGAGGAACAGGTCCA…
TRINITY_DN87_c83_g1	CGGAGGACTTACCAACAGCCGCCACTGCAGTGGGACAGAGATGAACTGGGGAGCAAGCCTAATAGACCCTCCAATCAACAGGAGGCCAGTTTTTTAAGATTAGTAGTGTCACAAGTAGGCTTGGATACAGAACTGGTTTGATCGTAGAAGTGGAGATGCCGGCATTGGATTGGAGTAAGCACAGTAAGAAGTCTCACAACACCAGGTTAAAGTCCAACAGGTTAGCCAAGGATACTGGCACTAACTCATTGACTAGTTTAG
TRINITY_DN87_c85_g1	CAGTGACCCAAATCCCGAGAATCAAACCCGGGTTCTTGGCACTGTGAGGCAGCTGTGCTAACCACTGTGCTGTTCTAATGTTTGTTATGATACAAATCTTAATGAGCTGGATTTCTCTGCCTATGAGGGTGATGGAAGCAGAGATGATGAATGACTTTGAAATTTTTTTTAATGTTTATTTATTAATGCCACAAGTAGGCTTATATTAACACTGAAATGAAGTTACTGTGAAAATCCCATAGTTGCCACACTCTGGTGCCA
TRINITY_DN87_c177_g1	TGTGCAAACTCCACACAGTCACTCAAAGCCAGAATTGAACCCGATTCCCTGGTGCTGTGAAGCAGCAGTGTTAACCACTGTGGCACCTGGGATTGAACTCATTCAACCCAAGCATAATCTTGTGCTCGTACTGCATCCACATGTGCCCTTCCTGCAGGGGCCATGGTCCCAAGCCCAACATCTCTGGCTAATTGTAGTTTCCTGACTAGTACCACATTGTGGATGATTTAAAAGGACTCTAAAGAACTGGACATTTGAGTCTGGGTCCTTTAAGAACTCGGTACCACTTGTGTGATTGTATTTACTTATTAAGACACTAAGTGAGTTTGGAAAAAAATCACCTGAAAGGGTTAACATAATTCACAATATTTAGCTGACAGCATTGCTTTCTTTTCCATC…
TRINITY_DN87_c178_g1	GGCAACTCCCGAAGCATTATCCAAGAGCAGCCCACCACAACCTGCCGCCCGCATGCCCCTTGTATTTTGATATTGCATGAAAAAATACTACATTTAAAACGTTTGTCACAAATGTCTATTTTTGATTAAAAATGTAAATCTTGGGACTAAAGTTTTTATTTTTATCCTTCTAAACATTAATTTGCATGTGGTTTCAGTTCTTCTGTCCCACCATTGTCTTTCTCCAGCAGTCTGTTTTATTGAAGTGGGCAACCAAGTTTAGATGATTTCTGTTAAGAGCATAAAATTGGTGCAGGAATAGGCCATTTGGTCCACTAAGCCTGCCGTGTCAGTCAGCAAGATCACAGCTGATCTGATTATGTGGCCTTAACTCTGCCTTCCCGCCTGTCTGCCCAAAGG…
TRINITY_DN29_c1_g2	CTGGGGGGAAGGGAAGGGAGAGAGGAAAGGTGGCTTGTGTGTTATACACTAATATGGATAAGAGGGATGAATTTGGAGATGTACTCAGGCCCTGATAACAGGTTTGGCATGTGTGCGCACACACAGCCACACACACGCACACATACTGAATCTGTAATTCACCTAACGTCATTCTACATATCCTTCAGCGTAGTACAGCGCTGTTGGAGGTACCATCATTCAGATGGGACGAGGCCTCATCTGCCCATTCAGGTGGACACTGAAGCTCCCACATCATTGGAAAAGCAGTGCTCTCCCCAGTTTACTGGTCAATGTTTATCCCTCAACCAACACCCTAAAATGCATCTTTTTTTTATTGCTGTTTGTGGGAGCTTGCTGTGCACAAAT
TRINITY_DN29_c1_g4	CAGCAAGCTCCCACAAACAGCAATAAAAAAAAGATGCATTTTAGGGTGTTGGTTGAGGGATAAACATTGACCAGTAAACTGGGGAGAGCACTGCTTTTCCAATGATGTGGGAGCTTCAGTGTCCACCTGAATGGGCAGATGAGGCCTCGTCCCATCTGAATGATGGTACCTCCAACAGCGCTGTACTACGCTGAAGGATATGTAGAATGACGTTAGGTGAATTACAGATTCAGTATGTGTGCGTGTGTGTGGCTGTGTGTGCGCACACATGCCAAACCTGTTATCAGGGCCTGAGTACATCTCCAAATTCATCCCTCTTATCCATATTAGTGTATAACACACAAGCCACCTTTCCTCTCTCCCTTCCCTTCCCCTCAGCGCCAATAATTCTGTAGCTTA…
TRINITY_DN29_c4_g1	CTTGCTCTTGTAACCATTGTTTATGTGGTGAGTCCAGTTGAGTTTCTGGTCAATGGTAATGCTAAGGATATATATCACATTATACTTCAACACAAAGTTGCCTTTTCTGTTTTAATTTTAGTTATTTTTGTGAAGAGGTACTGAAGGTACTAACAAAGAGGGATGCAACCTGCAAACAGTGTTGAGAAATAGCCCTTCCTTCATCTGGGGATCTGTGTAGAATCTGTGGGGCTACACAGTGGTTAACACTGCTGCCTTACAGCGTCAGGGACCCGGGTTCAATTCATGGGCTTTGGATTACTGTGTGGAGTTTGCACGTTCTCC
TRINITY_DN29_c6_g1	CCCCAGCTGTCCTGGCCCTTCCTTCAATCAACTTCACTAAAACCAGACTGACATTTGTTTGTTTGTGGGATCTTGCTGTGTACAAATTGAATGCAGCATTTCCCCAGATTATCAGAGTACCTGCACTCCAACACATATCTCATTGGGTGCACAGCACTTTGAGGTATCCTGAGGTTGGGAAAGGTGCTATGTAAATGCAGCTCAGTGAAAGCTATTGACTGTTGTGTTAACATGATTTTTCAGTTATGGCTGTTCCTCAATTCTGAAAGAGGCAATTGCCTTCAAGACAATGTGTCAGACAAACCTTTCTGTCAGGTAATGCAGGTGCGAGGGTGTATTGCAGCAAGATGGATCACTGCACTCCTCGCATTTCCTCCTCATTCATCCCCCTGAACTCAG…
TRINITY_DN29_c7_g1	TCTGAGATTTACTGCTGCATTTCCTTGGTGCCAGCTGTGTCTCTGTGCTTGGTATTCTTGCATCTGACTCAGAAGGTTGTGGACTTGGGTCTCATTGCAGGCAACGTTGAATCCAGGCTGCTTCTCCCAGTGCTGCACTGGAGTTGCTGTCTTTCATAGAATCATACAAACCCTACAGTGTGAAAGAGGCCATTTGGCCCATCGAGTCTGCACCAACTACAATCCCACCCAGGC
TRINITY_DN9_c1_g1	AGTGATAGTCACTGAGCTGTCGTCTTGCCCAGTATCTGGTCCAGTTTAGGCACACACTAACGACATGAAGCACTAGGCCAATCTCGAACAACCAAGAGCAGCCCCAGTACGACCCATCACGTGTATGCCCCTCGTTGGACACAAGGTGGATTGACTTAAAACCTGTGAATGGAAAGAGCCTAATTCCACCCTCTCCATCATTCAGGAATTCTCATCACATTCTTTACAGTACAAAAAGAGGCCTGTTCAGAGATACTTAGTCAGCATTTCTGTTTCAAACCCCCCAAATGCCCATCCAATTTCCTTTGTAATTGTTTATTGTCTCCACTTCCTCCTGCCTGGTTTCAGATTTAACAAGAATCACAGAGTGACAGGGTGTTAGGAAGGTCAGAGATATTT…
TRINITY_DN9_c2_g1	TGACGGGGGAGCAGCGCTCTGAAAGCTAGTGGCATTTGCTACCGGGTAGACCTGTTGGACTTTAATCTGGTGTTGTGAGATTTCTTACTGTGTTTACCCCAGTTGGCATCTCCACCTTGGGAAAGAAAAGAGCCAACGTTTCAAATCTGGATGACCCTTTGGACTGTCAGATCTGCTGAGATTTTCCAGTGTTTTCTGTCATTCAAAATGTGTTGGTTTACGCCA
TRINITY_DN9_c2_g2	CACACAGACAGTGACCCAAACCCGGAATCGAACCTGGGTCTCTGGCGCTGTGAGGCAGCAGTGCTAACCACTGTGCTGCCCAGTTAACCCATTCAGAAGCTTTTATAAAACAAACTTTAAGAACATCGTTCGTTAGAGTCAAACAAAAAGAATTAGCATATATTTTATCAATTAGAATACTTAAACACGACAATGTATGATTCTTAACAGCTAGCTATCTCTGTTGTTCCAATTAGCAGCATTCCCCATGTACATGAATCTCTTCTTTAGAACCATTTGACACAGAAACCAAAGACACTTACGTAGGTCCTAGATTTCTGGCCTTTTGGAGAGTGATCCAGACAGAGATCTGTCTTTTAATTCTCGTGCTGCAACTTCCAGAGAGAGCCCCTAGTCATT…
TRINITY_DN9_c2_g3	ACACACAAACAGTGACCCAAGTTGGGAATTGAACACGGGTCCCTGGGGCTGTGAGGCAGCAGTGCTAACCATTATGCCACCATGCTGCCCCTGTTAATGGGTGGTTTGAATTATGGGGCAACAGATTAAAATGGTCAGATATTTCTAGAATACATGACCCAGCTGGTGAAATATTCTGGAATATTCTTAACTTGCAGATCCATTCCATCATTAACACTAATCTTGACCAACAATATGCAGCGCGCAGGAGTGTTGGCTTAATGGAGTGGGCTCTGTTACTGGGCTAGCGATTATGAGGGTGGTGGGTTTGATCCCATCTCAAAGCCCTGTAATCCAGGCTGAAATCCCAGCTCATTGAGCATGGCATACACACACTACCCCCCCCCCCACCAATTTCAC…
TRINITY_DN9_c3_g1	CAGACCCTCTGAGAGTAGATCCGAATCACTGTGAGAGGCTTGTGACCTAATAGTCAGTGAAGTGACGATATATTCCAAGTAGCACTGGACTGAAAAGTGGATCCTCTGAGAGTAGATCCGAATGGTTATTATCTTACCCCATCATGGCCAGTGAAAAATCAGAGCTCGAGTGGGTACCGGACAGGTCTCTTACCTACCATTTGGAAACTAAGAACACAAAACCTATTCAGATAAAATGGTTTGAGAATAGAGCGGTTCGAGAATAGAGCCATTTCGCGTCTGGATGACACTTCAACCATTTCTCATTTCGCCAGTAGTCTGGATGACACTTCATAAGAGCTCTGATAAAGGGCCATCCAGACTTGAGACATTGACTCTATTCTTTCTCCACAGATGCTG…
TRINITY_DN9_c6_g1	CCCCTTCCTATAAAGGCCAACATCCCATAAGCCTTCCTAACGACCTTCTCCACTTGTGATCTAACCAACGTTCTATACAACTGAAGCATTAGACGGCAGCTTTTATACTCTATACCCCTTCCTATAAAGGCTAGCATTCCATAAGCCTTCCTGACAACATTCTCCACTTGTGTAACAACCTTCTCCACTTGTGACCATGCAACCTTCATGGATTTGTGAACCTGCACTCCCAGGTCCCTCTGTATGTCTATACTCCTAATCGGGTATCTATACTCCTAATTTGTCTACCTTTAATCACATAGCTCCACCTCCCTTTATCTACCTTTTGATCTCATAGCTCCTCTCTGCATTATTCCGTCCAAAATGCATCACCTCGCATTTGTCAGGAGCTGATGTGGC…
TRINITY_DN9_c7_g1	GATACAATCGGCCTAACCTGCATGTCTTTGGACTGTGGGAGGAGGCCGGAGCGCCCGGAGGAAGGCCCATGCAGACACGAACCCGGAGGAGGACCCATGCGGACACGGGGAGAATGTGTAAACTCCACTCAGATAATGTTGGAATTGAACCCACGTCCCTGGCGCTGTAAGGCAGCAGTGCTAACCACTGTGCCACCATACTGCCCATTATATCAATGATAATTGAAAGGATAGAGTGTAAT
TRINITY_DN9_c8_g1	AAACAGTGATAGTCACTGAGCTGTTGTGGTGTCCATGTGCTGGTCCAGTTTTAAGCACACACAACGACGCAAAGTACTAGGCCACTCTCAAAACATCCAAGAGCAGCCCACACACGACCCATCGTGTGCATGCCCCTCGTTAGACAACAAGGTGGACCGACACACCTGCGGAGTAAAAGAGCACAGCAGAGAACTTGGGTTGGGAGAGGAATTTAGACTGACTACAGAAGGTAGATTGTGGTGAATATTGGTCCTGGGGATTATATTCTGTAGTTGAAAAGCCAAAGGAAAAAACAAAATTTACAGACTGGGGGGAACTCAATATAGTGTAAAATCCAAACGGAGAATGTTCTTAAAAAAAAACTGGTGTGCATTATAATGTATATTTCTCTACAAATG…
TRINITY_DN9_c9_g1	AGGTCCACACAGACAGTGACTCAAGCTGGAAATCGAACCCAGGTCCCTGGAGCTGTGAAGCAGCAGTGCTAACTGTTGTGCTACCGTGCTGCCCATTAATTGAATATCACCTCATACTGTTGGAGTAATTATTGAAAAAAGCTTTGTGTTCAATTATTTGAAAGGAGCTGATTCAACTAGTAAAGTTGTGGATGCCATAAATTGATTGGTATAATTGCAAAACCTTGCCGATTGTTTTATTTCATTTTAATGATTTTACAGCCCTAAATCAGCCCTGTTGTTGATTATGAGAGCAGGGAGAATGAATTGTTTTGAACTAGTCCAAATAATTTTACTTGTACAAACTTAATGGCTCCCAGACCAAATAAGATAAAAATCTCATTGTTTTCTGGAGCCAAT…
TRINITY_DN9_c11_g1	GTTGCTCCTGAGGCCGGGGCTCCAACGCCGCGCTTTCTCCCAACGGCCGCTCTTCAAAGGGGCACGCGGGACCGGCACGCGGCGCGCTGACGTCACAGGGTGCCACGAGCGCCAGGAAACGGCGGCAATCACACAGCAGCCCGGCCGTGCCGCCATCTTGTCCCCTCCGCCCCTGCAGCAAAATGTAGTCGTTGAAGGCCTGCACGATCCGTGGCAGGTCCCTCTGCTGCCGGGCGCTGACAAACGCCATGGTCTCCTCCGGCCGCTTGACGAAGGCCTGCAGGTAGTCCACCACACCGTTGGCCGAGTGACGTTCGGAAAGCACCCAGGCCAGGGCCCTGGTCAGCAGCAGCTCCAGCGAATGGCCGGGGTGTGCGTTGAGCAAGGCGTTGCAGCGGC…
TRINITY_DN9_c13_g1	CCCAGGGTGGAAGCGTCAATTACTAGGGGGCACAAGTTTAAGGTGTAGTGGATAGTCAGAGGCTTTTTCCCCAGGGTGGAAGAGTCAATTACTCGGGGGACAGGTTAAGGTGCGCCTGGATCTTATTGCCGGGAGAGGTAGTGGAAGCGGACAAGGTAGTGACTTTTGTCTTGACAAGAGTGGAGATAGTGGAAGCAGATCCGATAGTGACTTTTAAGGGAGAGGGACAAGGTTTAAAGGAGATGTACGAGGCAGATTTTTTTACAGAGGGTGGTGAATGTCTAGAACTCGCTGCTGGGGGAGGGAGTGGAAGCGGATACGATAGGGAGCTTTAAGGGGCATCTTGACAAATACATGAATAGGATGGGAATAGAGGGATAGAGTCCCCAGAAAGGTAGG…
TRINITY_DN9_c21_g1	GATTAAGGGTTATGGGGAGGGGGCGGGAATGTGGAACTGAGCAGCGACAGATCAGCCATGATCTTACTGAATGGCGGGGCAGGCTCGAAGGAAGGTTTTTGGTAGGCAAGGGGATCAAGGGTAAGGGTTGAAGAGGAACTTCTTCACTCAAAGGGTGGTGAATCTCGAATGAGATAGTCAGCTGTTCGTAATGGCATGGGCAGTTCAGAATAGAGTTGAGGAGGAACTTCTTCACTCTCTGGAATTCTCTGTTGGAATTCTCTGCCCGTTGAAGTGGTGGAGGCTACCTCGCTAAATATATTTAAGTCACGGGTAGATAGGTTTTTGATAGAACACGGGTAGATAGGTTTTTGGTAGGCAAGGGAATTAAGGGTTATGAGGGAGAAAGCGAGGAGAAAG…
TRINITY_DN9_c23_g1	TTACTTATCCAATTGGCCAAATTTTCCTCTATCTCACACCATCTTACTTTCTTCATGAGCCGACCATGGGGAACCTCATCAAACGCCTTACTAAAATCTATGTATACGACATCAAACTGGATCAGTCATTGAAAGTTAGCATAGCAGAAGAGTGATTCCTCAAAGTTCAAAGGTGAAAAGATACAGACTTTGTTTTAAAGAAGCTGTTATTTGGGAAAATAGAGCCACCTGACCCCAAAGGTGAGAGTTGTAGTGGGGGGGGGGGGGCGCAGTACATTGAGACTGTGTTATTTTCTTCACATTCAACAAAATATCAGATGAGGAGAAGCAGAAGTTGATGCTGCTCAGACTTGCAGTCTAGTGAGGAGTTTGACGTCACCGGAAGCTCCAAATGCAAAA…
TRINITY_DN9_c27_g1	TTCAGTTCCCAGCACTGTCTGTGCAAAGTCTGCATGTTCTCCCTGTGTCTGTGTGGATTTCCTCTGGGTGGTCCGGTTTCCTCCCACAGTCTGAAAGATGTGCTGGTTAGGAGCATTGGCCATGCTAAATTCTCCCTCAGTGTACCCAAACAGACGCCGAAATGTGGTAACTAGGGGATTCGGTTAGGGTGCATTGGCCGTGCTAAATTCTCCCTCAGTGTAACCCGAACAAGAGTGTGGGGCAACTAGGGGAATCTTCACAGTAACTTCATTGCAGTGTTAATGTGAGCGTTACTGGTGACACTGATAAATAAAAACTTTAAATGTCT
TRINITY_DN9_c33_g1	GCTGGTGGCTTTTGCTACCAAGTTGACCTGTTGGACTTTGACCTGATGTTGTGAGATTTCTTACTGTGCCCACCCCAGTCCAATGCCGGCATCTCCACCTCATTATTTCAAAATATATATTAATTTTCTTCTTAGCCACTGTTGCACAATTCCGCCGTGGTATTGATATAGATCTGAGTTATGTTGTATCTCATCCTTGCCCCCCCCCCGACCCCCACCCCATGTCTTGCTATCGTTCCGTTCAGTTTGACCTGTCCCAATTTTCCAACCCTCAACCCACACAGCTCTTGTTTCTCAATCCCACATCCCACTCCTATCATAGTCCCATCCATTTCAGCTCCATTCCATCCCGATTTTCAGGAAAACTCTTACCCCCTCCCCCCACCTTTCACCTCAAAG…
TRINITY_DN9_c59_g1	TGGGAATGTGACAAAGTGCTAAATTCCATTTAAAGGAACCTCCTTTTTCTACCCCCCCCCCCCCCCCCAAAAAAGTTAATGGCTTACTAAGTTAGTGGTACGTTCTGTAAATTCTGCAACTAAGAGAAATAGCCAAAAATTGAAATCTTACTGAGTGGATCAATATCTGAGCTTTTCCATTCAGTGTTATCTGACATACAGTAATCTGTTCCTTGGAGTAAGGAGGAACGAGTCATTTGGTTGTTAAATTGTGTGCGTGAGCAATTTTATATTTGGGGTTCATCTTTTTGAGGAAGGCCTGTATGAATGACAAGCTTGCATTAATTTATTGCATTTCATGGGAATGCTTTCAGGAAGAATTATTTAATTACTTCTCTTTAGTGTTTTCACCTGTTAGAA…
TRINITY_DN88_c0_g1	CACACTAACGACATGAAGCAATAGGCAACTCCCGAAGCAACATCCAAGAGCAGCCCACCACAACCTGCCGCACGCATGCCCCTTGCTGGCCTGAGGCTAAAACTGACCCCAAGCCTACAATGCACTTAAATTCAACAAGGTGGACTTAAATGGCCTGAACCTGTGGAGACAAAAAATTCATTATTAAACAGGCAAAGACTCTACATCCCTGAGGCAAAAACGAAGACTCTACATCCCTGAGGCTGAAACTGACTATCCCTGAGGCTAAAACTGAATCCCAAGCCTGCAATGTTTAGTAAGGCCTGCTATATCCCCCTATATGTAAACTGCTCATGTGGCTGTCCAAGTGACTCTTAAACAACCCTAGCGTGCCTGCTTCCACCACCTTACTCGGCAGTG…
TRINITY_DN88_c0_g2	GAAAAAACTTCCAACTGTTCACCCTATCAATCCCCTTCATAATTTTATAAACCTCTATTAGGTCGCCCTCAACCTCTGTCTTTCCAGGGAGAACAACCCTGGTTTACTTAATCTCACCTCATAACTAATACCCTCCATACCAGGCAACATCCTAGTAAACCTGTTCTGTACTCTTTCCAAAACCTCCACGTCCTTCTGGTAGTGTGGCGACCAGAATTGCATGCAATAATCCAAATACATCTCACAGCACCAGGTTAGAGTCAAACAGGTTTGTTTGGGGTCGCAGGCTTTTGGAGCACTTCTCCTTCATCAGCTGAGTGGAGT
TRINITY_DN88_c1_g2	CTAAAATTAAACACTTTATTCCAAGTGCAGCCTAACATAGGTTCTACACCCTTTGAGTGAAGAAGTTTCTCCTCTTTGGAGTGTGGGAGGAAACCCACCCAGACACGGTGGGGTGGGGGGAGGTGGTGCGGGGAACATACAGACTTCATGCAGACAGTCTCAATGCCAGAGAATAGAGCCAATGTTTCCAGGCATTTCGAGTTACTTACAGCACAGAGGAATCACTGGATGGATGCGATTGAAGTAAGTCTCTACGGCTAATGATTACAATATAAGATGGAAATTCCTGAGTATATTCCAGTTTTTGTAACCTGGGAAACATTTTCTTTATGGGTGTGTTGTTCCAGACACAATGCTGTCCTCAACAATCACTAAGTGAGCAAAACAGTACAGTCTGTT…
TRINITY_DN88_c1_g3	CCTCACTTTACCGCTGGCTTTCTTTCAACAACACACTAGCAAATGTCCCAGCACTGATCCCTGAGTAACGTCACTTGTCACAGCTCTCCATTCAGAAACACACCCTTCCACTGTTACCCTCTGTCTTCTATGACTGAACCAGTTCTGTATCCATCTTGACAGCCTACCTCTGATCCCATGCGACTTCACCTTCTGCACATGTCTGCCATGAGACACCTTGTCAAAGGCCTTATTGAAGTTCATGTAGACAACATCCACTGCCCTACCCTCAATCATCTTCGTCACTTCCTCTCAAAATTTGATCACGTTAGTGAAACATGACCTCCCCTTCACAAACCCATGTTGCCTCTTGCTTATTTCCAAGTGGGAGTAAATTCTGTTTCTTAGGATCCTCTCCAA…
TRINITY_DN88_c1_g4	TGAGATTTAACCTTTTGAACTCGCCTGCTGCGAGGGACCTTATTAAACGTTTCACTAAAGTCCATGTAGACAACATCCACTGCCCTCCCTCATCAACCATTTTCCTCACCTCAGTCATCCGCTCCTCCTACTTGTCACAAGGTCAGGAGTGGGAATGTTTGTTGATTGCGATGTTTGGTACCATTTGCAACTCTGCTGATGAAGCATTCTGTGCCTGTATACAGCAAGATCTGGACAACATTCAGGCTGGGCTTAGTGACAAACAAATTTGCATTTCACAAGTGCCAGGCAATTGGCATGTCTGTGAAGAGAGAATCAAATCACCTTTTCCTGCCATTACCATTACCAAATATCCTACCATCAACATCCTGCAGGTTAATACTGACCAGAACTTTAACT…
TRINITY_DN88_c3_g1	GCATTCACACAGCGGGTCGTGCGTGGGCTGCTCTTGGAAGTTCCAGGAGTGGCCTAGTACTTCATGTCGGTGTGTATGCTTGATCCTGGACCGGTAGATGGGCGCCGCAACAGCTCAGTGACTAGCACTGCTGGCTGTGCAGATACATGGATTCGGGCCTGTGTCTGTGGGAGTTTGTGCATTCTCCCTGTGGTTGCGTGGGCACATGGATTTGGGCCTGTGTCTGTGGGAGTTTGCGCATTCTCCCTGTGGTTGCGTGGGTTTCCTCC
TRINITY_DN88_c7_g1	TTACATTTTCCTCCAAATCATTCATATATATTACAAACAGCAAAGGTCCCAGCACTGATCCCTGAGGAGTGCCACTTGTCACAGCCCTCCATTCAGAAACACACCCTTCCTCTGCTATCCTCTGTCTTCTTTGACTGAGCCGGTTTTGTACCCATCTTGCCAACTCAGCTCTGATCCCATGAGACTTAAGGGAGCTTTGACAAAGAGTCATCTGGACTCGAAAAGTCAGCTCTTTTCTCTCCTTACAGATGCTGCCAGACCTGCTGAGATTTTCCAGCATTTTCTGTTTCAGATTCCAGCATCTGCAGTATTTTGCATA
TRINITY_DN88_c9_g1	GTTTCTCTTCTGGATTTTAAGTACACTTAGCCTTAATTTTATACAGGAAGGATCATTGTCTGAAATTGTTGGATGGCGGGACCTCACTTCCTACCATTCACTTTCCCCTGTACCACTTGAGATCTCACTTTTCTGACCAGTCTATCATTTGGGAGCTTGTCAAATGTCTTATAAAATCTATGTAGACAACATCCACTGCACTACCCTCATTTATCCTCCTTGTTATTTCCTCATAAACTTCTATCAAGTTAGTAAGACATGATCTTTCCCTAACAAAACTATGCTGACTATTCCTGATCAATCCGTGCCTTTCTAAGTGACAGATTATCCTTGTATTCAAAATGTTTATAATAATTTGCCCACCACTGAAGTCAGACTAACTGGTCTATAGTTTTCTGG…
TRINITY_DN92_c1_g3	CTGATGTCCATTAACAATCCTGGAACTCCCTCCTTAACAGCACTGTGGGTGTACCTACACCACATGAATTGCAGCAGTTTAAGAAGGCAGTTCACCCACTTTCTCAAGGGGCAATTAGGGATGGGTAATAAATAATGACACACACATCCCAATAATGAATAAAATATATATGGTTGAATTTTAATATCCCATGAAACAAACTGGAGCAAACTATAAATTGCCTTTGCTGGCATTGTCCAAATGCTGTTGATGAATAAAAAATAAGAACCATTATTGGATTTTGTAGCATAACTGTAGCATAAATTGGTTATATTTTGACTTGATTCATTACTGTCACATGTATTGGGATACAGTGAAAAGTATTGTTTGATTTATTATTGTTACATGCACTGGATGCAG…
TRINITY_DN92_c2_g2	TGTCCTTTAGGGAAAGAAATCTGTTGTCCTTTCCTGGTCTGGCCTACATGTGACTCCAGAGGGGTTGACTGTCAGCTGCCCTCTGAAATGGCCTGACAAGGCACTTAGTTTCAAGGGCAACTGGGGATGGACCATAAATGGGAGCCAGTGCTTCAAATCAGAGGGTTATGGGCGTGTTCAGTGGAGGGTCATTTTCTTGCCATATAAAGGTGAGTAGTTGTCTCAAAATTGCTCTGCTGAAAGAAGAAATCTCCCTCCAAACCACCAACCCCCATTCAACTCACTTTTCAAAGAAAATTGGTTTCTCCTTCAAGTCCTGAGACAGAAGCTACTGCTGCTCTCTGTGCAGGATGTTTGCCCTAATGCATTGTGCACTGCCTGAAGGTCTGAGAACCTATT…
TRINITY_DN92_c3_g1	GGAGCATCCCCACCTAGCCCCTATCCCCATAACCCCACCTATTTACCCCACTAATCCCCCCAATCTATCCTTGGGACACTAAGGGGCAGTTCAGCATGGCTGATCCACCTAACAACTTTGAACTGTGGGAGGAAACCGCAGCACCCAGAGGAAATCAACACAGCTGTAAGTTGTTGATTGTAGGCAACTTTAAAAGTTTGTTTTTTCCAGGGCATGTGTTGTTGACAAACTGAAAACATGTGAGTGGCACAGGTAGTCATGTTGAATTTATGGGATAAAAGTGATTTGCAGTTTCCTCACAGTAAAGGCAACATTTAAAAAAATCATAGGATGTGGGTAGCACTGGCTAGACCAACATTTATTACCCATCCCTAATTGCCTTGAGAAGCTGGTGGGGAG…
TRINITY_DN92_c6_g1	GATTTTCTTCCCAAAAGGACATTAGTGAACCAGATGAGTTTTTCTGACAATCGACAATGGTTTCATGGACATCAATAGATTCTTAATTCCAAATTTCTTTTTATTGAATTCAAATTCCACCATCCGCTCTCACAGAATTCGAATCCTTGTTCCCAGAACATTAGCTGAGTTTCTGGATTAACAGGCCACTGATAATACCACTTGGCCATCACCTCCACACTTGAACCAGTGTGGATATATTCCTACACTTCGAGTGACATTGCTAATTAATATAGAACTTAGTGCTCAAGGACTCTAGGAACCGATTGAGATTAATCAAGTAAATTTCATATAGGACCATTTCTGCCCGCAGACCTTCACGGTTTGCATTTGAACTCAATTCCTTGATACGCAAGGTCA…
TRINITY_DN92_c6_g2	GATTTTCTTCCCAAAAGGACATTAGTGAACCAGATGAGTTTTTCTGACAATCGACAATGGTTTCATGGACATCAATAGATTCTTAATTCCAAATTTCTTTTTATTGAATTCAAATTCCACCATCCGCTCTCACAGAATTCGAATCCTTGTTCCCAGAACATTAGCTGAGTTTCTAGATTAACAGTCGAGCAATAATACCTCTAGGTCATTGACTCCCCATCAAATATCAAATTACCCTCTTCATGTCAAATTTTAGCTGACTAAGACAGCAGCATAGGATGAGTATCCAACACTACATGAGCTTCTCTGTAGCTGATCTTACTGCAATTGGAAGCATTGGCGACTGAACCTCAATCAGTCATTTCCTTATTAGGTTTTAGAGTCTGGGACTGGTAGCTG…
TRINITY_DN92_c8_g1	GTTTGAAATTTGAATTCAATCAAAATGTGGAATTAAAAGTCTAATGATGACCATGAAACCATTGTCGATTGTCATAAACCAATCTAGTTCACTAATGTCCTTTAGGGAAAGAAATCTGTAATCCTTACCCAATCTGACCTACATGAGACTCCAGATCCACATCAATGCAGTTGATCCTTAACTGCCTCTGAAATGGCTTGGCAAACCACTCAGTCCAAGGCAATTAGGGATGGGTAATAAATGCTAGCACAAGCAGCAAGGCCCACATTCTGCAAACGAATT
TRINITY_DN99_c0_g1	GCCACGACAGATCAGCCACGATCTTATTGAATGGCGGGGCAGGCTTGAAAGGCCAGATGGCCTACTCCTGCTCCTATTTCTTATGTTCTTATGTTCTTAATGAGAGGCATCCTCCCTCTAATACCAAGCAGGCATTAGGTTTATCAGACCTGACCTTTGTAAATAGGGCCCCTACCATTGCAACTGTGTAAACTTGATACTGGAATTGGATGCATAATCGGTATCCTGTGAGTTAATAGCTATCCCAATCAGATCATTGTTCACTTTATATCATGTAAACTCATGAATGGGCCTAAGGTCACCACTTGCAGTCCTGAAAAGTGCCCCATTTACCTGGAAGAGTGGATGCTGCCATTAAGCCAGAAAGACATTCTGCCTAACACACTGATGAATAATGTG…
TRINITY_DN99_c0_g2	GCCACGACAGATCAGCCACGATCTTATTGAATGGCGGGGCAGGCTTGAAAGGCCAGATGGCCTACTCCTGCTCCTGTTTCTTATGTTCTTATGGCACAGCAAACTTGAGCTGTAGCAGCTTTGGATTCAGCAAATATAATTTCTAGGACCAAGTATTTGGTGGTGTATATAGCTAAACAGTCAGCATACTGGATCATCATATAAACATACAGCACAAGAGCTGGTAATAGAATCCTACAATGCAGGAGGCCATTTGGCCCATCAAGTCTGCACCAGCTACAATCCCCTCCAGGCCCTATCCCCATGATGCCA
TRINITY_DN99_c7_g1	CACACAACTTTTGACTGTGGGAGGAAACCAGAGCTCCTGGAGGAAACCCATGCAGACATGGGGACAACATGCAAACTCCACACACATAGTCAACAGCCAGAATTGAACCTGGGTCCCTGTTGCTATAAGGCAGTGTTAACCACTATATCACCATGCCACCTACAGTACAGCTTCTTCTGCAGTTTCTTAGATTTAGACCAAGTAAGATTTCTGAGTGTTTGCACAGCTCAAGCAGTCATACTGATTACACTGCAACCAATACAGGATGACAACTTTCCCCTTTAGTACACCAACAGCTTAGTTCCTTGTGACAATTCAGTCATAGCAATGCATTATGTTTTTACACAAAAGGAGATATAACAGAATGTATGAAAATCTTAATTTTGGGAATACATTTTC…
TRINITY_DN99_c8_g1	AATCAACATAACCCTCACATTTTCGGACTGTGGGAGGGAACCAGAGCACCCAGAGGAAACCCATGCAGACAGAGAGAAAATGTGCAAACTTCACACAGAACAGTCACCCCAGGTCAGAATTGAACCTGCGTCCCTGGCGCTGAGAGTTGGCAGTGCCAACCCACTGGGCCACCATGCTGCTCATAAATATCACTTAGTTAACAGACAAAGCAGCTAAAACTTTTGGCAGTGGTGCGATTTGAGTCCACATCTCTGTTCAGCACTTTAAATCACTTGGCCACAACACCACTCAAACAATGACACAACTGTGGGGCTGTGTGCATCCAGTAGTTCTATTTTACCTTGTGTAAACCAGCACTTCACAAAAGAACGTCACCCTCGGAACTATGTTATTTTCAT…
TRINITY_DN99_c9_g1	GACAAAACATACTGTTCATAGAGTACATAGGAGAGAAAGGAAGAAGAGGGTGCAGAGTGTAGTGTTACAGTCAGAGAAAGATCAGTTTAAAATAGGGTAGCTTCATTCAACAGGATCCCTGCTTTGTCTGTCTCATCACTTCCTTTGTTGTTTGTGTGACATTTTTCCTCATTACAGCACACGTCACTCCTGAAGTTTGCAGAGAGGCAGTTTTGCCGTGTTGTTGGTGAACATTGTGCTCTGACCTGATTAGTGTTCTTTCTACTGAGGAAATTAAATGGGGTCGAGATACAAATCATGCCAAATCTAATTGGATTGATGAAGCAGGTTCCAGGAGCTGAATATCTCTTCTACTTCCTGCTTTTGTTCTGAAAGCTCCCCTTAAGCCCAAGCCATCAA…
TRINITY_DN99_c13_g1	TCCACTCACCCTAAACATCTTTGGACTGTGAAAGGAATTCAGAGCACCTGGGGAAAACCCTGAAAATTGGTTCGGGACCTGCGTTCCTAATCTACTCAAGTCCAAGGCTGCTGCTAGAATGATTCATTACCAAATTACTTGGAAGCCACTGTCATTTGCTATGTGAGGTAAAGGGACATTCTGAATGAGGTCACTTGACAAAGAGCTGCACTGACCCTCTCGCAATTACTGAAGGATTGAAGAGGAACTTGGTTGCTCAGATTCTATTTAGTTGAGTTGGAATCAATTCAGGCTGTCAGAATCCATTCAAAGCCTTCAACAAAAGATATTTAGCAACTAATGAGTCAAAATACTGTTTCGGACAGCTAGTTGCTGTGGCCTGTTTTCTAATTAAGTTGC…
TRINITY_DN25_c6_g1	AAATAAACCTGTTGCACTTTAACTTGGTGTTGTGAGACTTCTAACTGTTTCACTGTATACATGTGACAAGAATAAATCAAATCAAATCTAACTGATGACCGCATACTCAAAATACTTCAACCTGCCTGCCAGGGTGCTTGGGGAGATGAGGATGAGAATGGCTTTACACGCTACAACGATATGAACAATATTCTTACCCGTGACTTCCATTGAGATTTGTTTGGTGAAACTACACAGCAAAACTTGCTTGCCCTGGAAACAGAGGCCGCAAGCTTACCACCATTCATGCCAACGGGATTTTCCCATCCTGCGGTGGTGAACAGGAAGCATCAAACTCTCTGACCAGGCTGTAGCAGGAGCCTGGGTGTGTGTAAGTTGGCACCCATATGCAAGAATTCT…
TRINITY_DN25_c8_g1	CCAGGGAGAACAATCCCAATTTATTCAATCTCTCCATCCATACCAGGCAACATCCTGGTAAACCACTTCTGCACGCTCTCCAACACCTCCATATCCTCCTTAGTCTATTCTAACAATAACCAAATTTTGTCCTCACTGAAATCTCTTGATCACTGCAAAAGAACTTTTTAAAAACACTTTCCACACTCCATACTAACAGGAAGTTGGCTGTTATACAAAGTTGTCTAAGACTGCAAGTATTCTTGTAGACTGCGACTCCTCAGAAATAAACTGACAGAACTGAAAAAACTTTTTTTAACTCGATTTATTATTAATTTACAAAATGACTTAATGAAGTCAGGTTTTAAATGCATCAGGACAAATGCAAAACAACACTACAGTGCTTTATTTGTATCGTGC…
TRINITY_DN25_c9_g1	GTTGGAAAATGTGGCCATTCAAATAGGATGAAACAGTCCGAAAGCCATGCTAAATTCTGTTGGCGACTTGGGGATTTTCACAGTAACTTCACTGCAGTATTAGTGGAAGCCTACTTATGAAATGAATATATAAATTAATAAAATAAGTAAAAGCCAAGATATCCATCCTTGTGACTCACTGCAAAATGACACATTACCCAATTGAATGATGTTTGTTTGTCTGTCAGACCACAAACTTTTTTTTTCCATTTTCAATATGTTCATGTCTTCAAAAGAACAGTGTGAAAAGAACATGACAAAACAATTTTTTTTAATGTCTCGATTTTTCATCGGGTCGCACAAGCAGTATCCTGGAGACTGATCTTCAATCCTGGCAACTCCAGGTCAATCCGAGAGAGT…
TRINITY_DN25_c13_g2	ACGCACCCCGGATATTCTCTCTTCCACCTTCTTCCGTTGGGAAAAAGGTACAAAAGTCTGAAATCGCGTACCATCCGACTCAAGAACAGCTTCTTCCCTGCTGATGTCAGACTTTTGAATGGACTTCCATTAAGTTGATATTTCTCTACACCCTAGCGATGATTGTAATACTACGTTCTGCACTCTCTCGCTTCCTTATCTATGAATATGTTTTGTCTGTATAGGGCGCAAGAAATAATAGTTTTTACTGTATGTTAATACATGTTAAAATAATAAATCAAATCATATCCTGCTCTGCCC
TRINITY_DN25_c13_g3	GGTTGTGTACCAACAGACTTGAGGACAACTTCTTCCTGGCTGCTGTCAGACTTTTGAATGGACTTCCCTTGCATTAAGTTGATCTTTCTTTACACTCTAGCTATGATTGTAACACCACGTTCTGCACTCTTTTTTTTCTTCTCCATAAATGGTATGCTTTGTATAGCGCACAAGAAACAATACTTTTCACTATGTTAATACATGTGATAAATCAAAATCATCTAT
TRINITY_DN25_c14_g1	GTGTAGGCGGTGATCGGATGGGATGGTGTTGGAGCAGCAGGGAGAGCAGAAACTGGAGACAGCGATGCACCATAGAAAGCATTTGCATCAGCTTGGTATGGCTCCTGCTTTGCCTAAGACCGCAAGGAACTACAGAAGGTTGTGAATGTAGCCCAGTCCATTACACAAACCAGCCTCTTGTCCATTGACTGTCTACACTTCCTGTTGCCTTGGAAAACTAGCCAGCATA
TRINITY_DN25_c15_g1	TGTTCCTGCGTTTACTTCAGATTCACAGCATCCGCAGTATTTTGCCTTTATCTTGCTGTGTGCAAATTGGTCTGCTTTCCCACATTAATCAGGAGAGTTTAAATGCAATTAGACTCCCTGAGGTTGTGAAAGGATAACTTTATCCATCATTTCTCTTCACACAAAAACAGTTGCTAATGATGATGCTTGCAAACACCTATTTTTAATAGATTATGTTTGGACAATACTTGCAAACACCTATTTTTAATACATTATGTTTGGACAACTTTACAGAACAGCTCAAGATATCAGCCCATTCCGGTACAAAGGTTAAAATTTAATTTGCCAACAACTTGTAATCATTTTGTGCTGGATTACTCCCTTATCAGCCTTTCCCAGATCAACTGCTTGCCAGACCCC…
TRINITY_DN25_c20_g1	ATTTTTTATTGAGTTCGGGTTCCGCCAACCGCCGTGGCGGGATTCGAACCCGGATCTCCGGAACATTGTGAATTCAAATTCCACCAACCACCGTGGCAGGATTCGAACCCGGATCTCCAGAACATTAGCTGAGTTTCTGGATTAATAGTCTAGTGATAGTACCACCAGGCCTGTCATGTCATTAGCCATCAGTTCCGTGCTGCCATCAGACTCTTGAATGGTCCTATCATATATTAGCTGATCTTTCTCTTCCCCCCACCTATAATTGCAACACTATATGACTGTAACACTTCATTCTGCACTCTCTCATTTCCTTCTCAATGAACAGTATGCTTTGTCTGTATAGCACGCAAGAAACAATACTTTTCACTGTACATTAATACTTGTGACAATAACAAA…
TRINITY_DN25_c33_g1	GCTATGCATCATCCTTACTTGAAACAATGTCACCGTTCCTTCACTATCACTGGGTCAAAATCTTGGAAGTCTCTCTCGAACAGCACAGTGAGTGTACCTGCACCACAGTGACTGCACTGGTTCAGGAAGGCAACTCACCGCCACCTTCTCTAGAACAGGGCGATAAAAATACTGTGATACCCGCACTCCATAAAATTATTTTTTTAAAATGTCACCTGCTCTTTGCAGACTGCATGACCATTGTTGGGTCACTAGTAGAGACTTTTTTTTCAAGAAGACTTAAAAACTAATTTTCAAAACAGAATAAACAGTGCTCCTGAAATATTATTCATTAGCTGAAAACATATTCAAAGTTGAGGAGGTTTGGGCTCTGAGTGGAGTGGGCCTTTTCTCACATTA…
TRINITY_DN25_c34_g1	AACAGTCTTTCATAACAATGATAAGAGCTAGAACCTTAGTTAACTGTGATCTGTACCTTGGTCCTGATCTTTGTAGAGTTTCACAGATGTTGCTCTTAAAACCTCTTTTCTGAACCATTGATCTTCTGAATCTTTTGTAAAAATGTTACTTTGAAGCCCACATCAGATTCTTAGCCTTCCAGTCTCTTGGGTGAAATATAACACAAATTTTAGGTTTGGATGCCAAAATCTATAGAATGACACACTGCTCTAACATTATGTTTGGAAGACACACAATGTAAGTAGACCTGTGGTAAACACAATGCTCCCTACATCGGAATATTTCAAAGCAAACACCATTGAAAAAAATATGCTTTTAATTGGCAATAATGGGTCTTGTTAAATGAGTATCACTGCGAA…
TRINITY_DN3_c0_g1	ACAAAGAAATAATGAGATTATTCAACAGCATCTACAAAGAAACAATGAGATTCTTCAACAACAGAAGCAGCATAATGAGATTCTGAGACAGCAAAATGCAATTCGAAACCAGCATCTACAAAGAAACAATGAGATTCTTCAGCAGCAGAATGAGGTTCTGAAACAGCAGAGTGAGATTCGAAAACAACATTTACAACAAAACAATAAGATTCTTCAGCAGCAGAGTGAGATTCTTTGTCAACTTCTGCAAAGAAACAATGAAACTTTGAATGAAATGAGGCCGATTCTGTCTCGAGTTGTAACATGGTCCTTCAGAATCCATGAGAAAGAAGGACAAACCTCAAGATAGTTCAGAGAATTAATTGGATACTGGTGAAGAAAGTCTGGCTATTGAAGGTT…
TRINITY_DN3_c0_g2	AAACAATGAGATTCTTCAGCAACAGAATGAGATTCTTTATCAGCTCCTGCAAAGAAGCAATGAAACTTTGAATGAAATGAGACAGATTCTGTCTCAGATTGTAGCGCCTGCACCTTCTGGCCTGTAGCAGCCCAGTACATAGACATCTGATTCTGGTCATTTCTTTGCCACAGGAGAGGTCACATCACGGGGAGATATAGAAGGAATTAGACAGTATTTCCTCTACCTCATTAACCCTCTCTCCTTTTTTATTATGAGGAATATCTTTCTGCCTTTTCAATCTGGGTTTTTCCATAACAGAGAGCTCTACATCATGAGGACAATGGCTGAAGAAACTTGAATCTGGGAGTCTTGCCCCCACCCCCCAGCCCGATCATAGCACCTCCCATTTTCGTGGGA…
TRINITY_DN3_c0_g3	GAAACCCACACAGACACGAGGAGAATGTGCAAACTCCACTCAGTGACCCAAGCCAGGAATCAAACCCAGGTCCCTGCAGTGCTAACCACTGTTGCCCAGTAGTACTACTGTATCTTTTTACAAATAGATACAAAATACCTATTTTTAAATTTCTAATTTCCTCACTATGACTTACTATCCCACCTATTTTAGTGTCATCTGCAAATTTGGCTATAATACCTTACATCCCTACATACAAGTCATTAACATAAATTGTAAATAGTTGGGGCCCAAGGATTGAACCCTGTGGTTTGAATCAATTTAAAAAAGGCCTGAATCTGAATATCCCTACCCCCACCCTCCCAGCCGAATTACAATGTCTCCCACTTTCTTGGTTCCAGGAATGGGCATGTTGGAATT…
TRINITY_DN3_c4_g1	AAATAGACAACCTCTCTATTTCCCACATTATACTCCATCTGCCAAATATTTGCCCATATATCCACTCATATTCCTTTGCACATTGCACTACCTATCATCTGCAAATTTTGCTATGAAACCTTCATCCAAGTTATTAACATAAATTGTAAATAGTTGAGTACTGATTGTTACAGTTTGCCAACCTAAAAATGACCCATTTATCCTGGCTCTCCTTTTCCAGTTAGCCAACTCTCTACCCATGCTAATATGTAACCCCCGACGTGATGTGGTCTTGTGCAGTAATCTTTTATCTGGTGTCTTTTGGAAATCCAAATATCCTACATCTACTGGTTCCCCTTTATCACCTTGCTTGTTACGCCCTCAAAGGGCTCTAATAAGTTAGTCAAAAACCATTTCCTT…
TRINITY_DN3_c5_g1	TAAAATATGTAGGGATATGGGGGTAGGATGTGGGTGGGATTGTAGTCGGTGCAGACTCGATGGACCAAGTGGCCTCTTTCTGCATTGTGGGGTTTCTATGATTCAATGATCTTTGGTCAATGGGAGGGAACCAGAACACCTGAAGGAAACCCACAGACACTGGGTGAATGTGCAAACTTCACACAAATCACCTAAGGTCCAAATTGATATTTTGCATCCTGGAATATTTGGTATCCTTTTTTGAGCCTGATCTCTGCAATTGCCCCATCATATTCCTGTGACTATTTGCACCTGTAACTCACCAACTTTATTTATCACCACACTTTGTGTATTTATGTACATGCACAATAAGCCTAGTTTCACAAATTACCTCTTACCATTTCTTACTCCAGTGCAATC…
TRINITY_DN72_c0_g1	GAGCAGAATTAGGTCATTCAGCCCATTGAGTCTGCTCGGCCATTTGATCATGGCTGATATGCTCCTCATCCTCATTTCTGTTCTGTAGCATGCTTCTTCCTGGTATCTTTGTATGAAGAAAATAAAATTGTGAGGAACAGTGAAAATAGCATTATGAGGAAAAATAATGTGATATAACTAATATATGTAGCATTTTTTAAAAAATGTTAGTGAACAGTCAAAAGAAAAATATACAATAGGATAAAACCTAGAGGAATGAAACATTCACCAATTTAATAGGAAGGATAGTAAAATGAATAGCAACAAATAATAAACAGGAAATGGGACAGATTGCCAAAGGATGAGAAAAGAATAAAATGGAAAACTAATTAATGAAATTTTAAAAATAGAATGTTGCAA…
TRINITY_DN72_c1_g1	ACCCCGACAGGTGCCAAGAGTGTGGCGACTGGGGGGAATTTCACAGTAACTTCATTGCAGTGTTAATGCAAGCCTTACTTGTGACTAATTAAATGAACTTCTGAAACTTTAAGATACTTAGAGGTACGAGGGCAGGTGACCAAAAGCTTGGTCAAAGAGGTCATTTTTAAGGAATATCTTAGATGAGAAGGATGATTAGGCATAGAGGCTGGGGGAGGGAGTTCTAGAGCTTGTGCCCAAGACGGCTGAAAGCATGATTAAAATCAAAGATGTGCAAGTGTCCAGAACTGAAGCTCAGAGATCGCAAAGCATTAGAGGGCTGGAGGAGATAAGAGGTGCGAGTGTGCAGCTGATTTCACAGTGACAGCAAAGTAAAAACTGCTCTGCCGGGACATTATT…
TRINITY_DN72_c2_g1	CTAAACTCTAACGAGTACAAGTCCAGTTTATTCAGCCTCTCCTCATAGCTCAACCCCCTCAACTCCGGTATCATGGCAATGCATATACATGTCGAGGAATGGTGAACTTTTCCCTCACTTCTCAAAGCACTGGCAATGCTGGATTTTCCAACTGACTTTCTCTCAGGGGATTATACAAATAGGGTAGATTTCTTAAATGCATATTTATAAAAGTTTGTATATTCATTTAGGGCAGCATTGTAGCGTAGTGGTTAGCACTGCTGCCTCGTAGCACCAGGGACCGGGTCTGATTCTCAGTTATGGGGCACTGTCTGTGCGGAGTTTTCACGTTCAACGTGTGGCCCTGTAGGTTCCCTTTGGATGTTCCAGTTTCCTCCCACTGTCCGAAAGATGTGCTGG…
TRINITY_DN72_c2_g2	CTACCCCCCCCCCCTCCCCCCACCACTGCCTCGGACCCCGTTACGACCGCAAGCCCCTTCCCCATCCCCCTCCCAAGTTAGGAGGGGTTGGGGAACATTCCTTGGCTTCCAGTTTCCGGAAGGTTCCTCTTGACGCCACTGCGGCGTGGCCGGGAGAGCCTCCGGCCATTCCGATTGGCCGGCAGCTCTCTAAGGCGTGGCTTCCCCCCACCCAAGTGAGGCCCGGCGGTTACCACGGCTACCTCACAGCACCGGGGACCCCGGTTCAATTCCCGGCTCGGGTGACTGTCTGTGCCGACTCTGCACGTTCTCCCTCCAATAAGACCGCAAGCCTGGCCCTGGTTTCCTCCAGTGGTGGGGTCTCCCATCCATGGAGCCGGAGGGCTGATTAACCCCCGC…
TRINITY_DN72_c4_g1	ATTGTGGCTGATGCAGAGTCGCCGGCTTAATTGGCCTCTTTCTGCACTGTAGGGTTTCTATGATTCTATGAACTAATGTCACTAGTAGTTAAATTCTGGTGAGAACCCTCAATTTGAGAATCTACACGTGTGCTCCCCAGCACTATACTCCCTAGCTCCCTATACTCACTGGTCATTCTGATAACTGTCAATTGATCTATAGTAGCCCAGAACTAGAAAAGCCAAACAGCAGCTCCCAGCAATTGCTCCATGTACATCATGTTTGCATAATTTAATCATTTCATTCATGGGATGTGGGCATCACTGGCAAGGCCAGCATTTGTTACCCATCCTGATTGCCCTTAAAATAAGGACATTTAAGAATTATGGGGTCCCTGCAGTGTAGGGGGGGGTCATTCA…
TRINITY_DN72_c5_g1	GTTTCCATCCCCCGGTGAACTTTCAGGTGGTTGTTGATGGATTTTTACAACAATTGAGAATGGATTCATGGTCATCAGTAGATTCTTAATTTTTTTTACTGAATTCAAATTCCATCATCTCCCATGGTGGGATTTGAACCCAGGTCCTGAGGACATTAGCTGAGTTTCTAGATTATTAGTCTAGCAATAGTATCACGAGGCCATTGCTTTCCCTTTACTGTAAATTTCAAAACCAAGATTGGCAGATTCCTTAGGCGAGGGTATTAAATCTTATGGAATTGAGATGAGTAAATGGAGTTAAGATACAACCATGATCGAATGCAATGGCAGAACAAGCACTCAATACTTTCCTCTTGTTGTTACATCCAGCACTGAATTCTTTGCAACATCTCAAAGGGT…
TRINITY_DN72_c7_g1	GCAGTGTACAAGGAGCAGTGCCAGCAGTTACTGTACACATTTACTGGATGTCTTAGTGCCAGTACCCTTCACACTGGCACTAAGACATCCAGTAAATGTCCTGTCCTACCGAGGGGAATAATCAATCGTTCATTGTTTGGGAAAGCGAAATTAAATTTTTGCGCAAACTGCATGTGGAAAGTCACAAGAACGCAAGACTTCCTCAGCCAGCCGTGGTAGACAATATCGCCGGCACTCATCTTCTTCGCTCAGGGGCTGCAGATGTCGGTGAAGATAAAACCCCGGGATGGTCCCTCCCCACACCCGGCCCGGTGAAGGGAAGGAAAAGTCTGAGCTAACTTTTCCCCAGGCTGTACTGATGACTTCATCATGGAACTGGTTGGAAAGATCTGCTGAGTC…
TRINITY_DN72_c8_g1	GGGAGCTTGCTATGCACAAATTGGTTGCTGCATTTCCTACATTACAACAGTGACCACGCTTTTTTAAATGTACTTCATTAACTTTAAAGTGCTTTATGTCCTGGGTTTGTGAACGAGGCTTTAGAAATGCACCTTCTTTCTTTCCTCGTGTTAAGAAAGTGAGCATTTGCTACTTCTGCATCTGTAAAATCAGTTTTTGCTGCTTGCATGTTTGAACTGTTAACATATCTAGTATTACTAATCTTAATCTATTAATGCACAAAACAATGTTTTATGTGATGTGAAAAATGTTTCTCTTCCATTTTACTGTTTTAAACTGAAGTTTGACAGCTTCTACATTGAAAGTACTATGTAGACGTACAATATTTAAGGATGGTCAAAGATTGGTTTTCTGAAACT…
TRINITY_DN72_c9_g1	GGACTACATCCGCAATCCTCCAATCTTCCGGAACCTTCCGGGTGGCGACTCGGGGATTTTCACAGTGGCTTTATTGCAGTGCTAATGTAAACCTACTTGTGACACTAATAAATAAACTAACCTATTCATGTGGTATTGAAGGAGATTTGCAGGATTGCTTAAGCTAGTGGAAGGACCCCAAGATCTCATAACTCTAAGGATAAATAGCTGGAACACTAAGGAGAACTGAAGCAAGTTCTAGAGAGCTGTGGCATACCTTGGTTTGGTTTCAGGAGAAGCAAATGAAACCTGATGACCTTGTGGTGTATAAAAGCACTCTTGGATGGCACAGTGGTTACATGTGGCACAGTGCCACATTCCGGCACCTGTTCGGGTCAATGCACCTAACCAGCACGTGCA…
TRINITY_DN72_c11_g1	ACTGCAGTGAAGTTACTGTGAAAATCCTCTATTTGCCTGTTTGGGTACCCGGAGGGAGAATTTGGCATGGCCAATGCACCTCACCTCTTTCAGACAGTGAGCAGCATGGTGGCACAGTGTTTTGCACTGCACTGCTGCCCCACAGCATCAGAGACCCGGGTTTGATTCCGGGCTTGGCTTACTGTGTGGAGTCCGCACATTCTCCTCGTGTCTGCATGGGTTTCCCCTGGTTTCCTCCCACAGTCCGAAA
TRINITY_DN72_c12_g1	CTTCTTATCCCTATTTTTCTGCCTTCTCCCCATAACCCTTCAACCCATTACCAATTAAAAATCTGACCAACTTCTCAAATTTACTTATTGTCCCAGCATCCATTGCACTTGGGGGTAATGAATTCCACAGCTTCATAATCCTTTGGGAGAAGCAGTTTCTCAACTGTTTTAAATTTGCTACCACATCCTAAGACCACGACCCTCATCCTAGAATGCCCCACAAGAGGAAGCATCTGGTCCACGTCATCTTTACCCGTACCTTTTTCTCATCTTTTATACCTTTAATTTCATCCCTCCTAATTCTTCTAAATTCCAGAGTGTTTAGGCCTAACTGTTCAATCTCCCTGCTTCTGCACGGGTTTCCTCCGGGTGCCCCAGCTTCCTCCCACAGTTCAAAGA…
TRINITY_DN72_c13_g1	AATTCTCCCTTAGTGTCCAAAGATGTGCAGGTTAGGTAGATTGGCCATGCTAAATTGCCCCTTAGTGTCTAAAGATGTGTAGGTTAGGTGGATTGGCCATGCTAAATTGCCCCTTAGTGTCTAAAGATGTGTAGGTTAGGTGGATTGGCCATGCTAAATTCAGTGTCAGGGGGACTAGCTAGGGTAAATGCATGGAGTTATGGGGACAGGGCCTGGATGGGATTGTGGTTGGTGCAAATGGTCTCCTTCTGCACTGTAGGATTCCATGACAAATGATTTTGGGTCTCCCTTAGTGTCCAAAGATGTGCAGGTTAGGGGGATTGGCCTTTTCTTATGCCCAGGTTTAGGGAGAGCCTAGGTGGGATGCTCTTTTGGAGAGTTGGTGCAGATTTACTGGGC…
TRINITY_DN72_c14_g1	CACTGTCCAAAGGTATGCAGGCTGTTGGATTGGCCATGGTAAATTGCCCCTTGGTGTCCAAAGATGTGTAGGTTAGGTGGATTCGACATGTAAATGCACGGGAATATGTTTGGCGATGGGATTGGGCAAGATGCTCTTTTGGAGAGTCAATGTAGCCTCTAAGCTGAATGGTCCCATTCTGTACAGTAGGAATTCTATGGTTCTATTCATATTTTCACCCAATAATGTTAATATTTTTCTCCCCTTACCTCCTAGTTTTAGTTGGCCATCCTTGATTATTTATACTGCCTCCCAGGCAAATATAGCTGTATACCTTTGTATATAATTGATACTGGAACCATGGTGACTTAAAGCAATCTGAACCAACTCTTACATGTAGCCTGTGGAAATATTACCGCT…
TRINITY_DN72_c15_g1	GTTCACCTCCCACCCAACTTGCTGTCATCTGCAAGCTTTGAGATGTTACATTTTGTTCCCTCATCCAAATCATTAACATGTATTGTGAATAGCTGGGGTCCCAACACCGATCCCTGTGGTACCCCACTAGTTACTGCCTACCAATTTGAAAAGAATCCATTAATTCCTGCTCTTTGTTTCTTTAAGACTGTTGAAATATCTCTCTTTCCCCTTTCAAATTTCACTTTCTTTTTCCCACCCTAAAAAGCTTCCGGATGATGCCTTTGAAGCCAAGGCGCTTCAAAGGCATCATCCGGGGCATCTAATGGGGTAGTTTGTCTCATGTTGGCTTTACATTTTAATTGACGTGTTTGGGATTTCCCATTTATTTGGCGGTAGAAGGTCATTGCACAGTTCATA…
TRINITY_DN72_c17_g1	CATCCAAAGGAAATCCAAGCAGACACAGGGAGAATGTGCAAACTCCACACAGGCAGTGACCCAAGCCAGGAATCGAATACAAGTTTGACATCTGTCACTCCACTTTCAGCTGCCAAGACTCCACCCTCCCCAAACCACCTCGCCTCTCTCCACATCTCTCCTCTCCTTTTAAGGCACTCCTAAAACCTTCCTCTTTGGCCAAGCTTTTGGTTGCCTGTCTTAATATCTCCTCACACAACTCAGTGTCATAGTCTACGGCTCCTGCGAAAGGCCTTGGGATATTTCACAATGTTAAAGCTGCGATATAAATGCAAGTTGTTTTTGTAATTAAACCATGAGTGACGCCCCCCCCCCTCTTTTTTTGGCTGGGTAGTCGCAAAGACTTGGAAGAATTAAAAA…
TRINITY_DN72_c20_g1	TCTGGACCCCCCACCATTGGAAACATTCTTTCTGATTCTACCCTGTCTAACCCTGTTAGAATTTTGTAAGTATCTATAAGATCCCCCCTCACTCTTAAACTCCATTGAATAAAATCCTAACTAACTTAGTCTCACCTCATATGACAGGCTTGCCACCCCAGAATCAGCCTGGAAAACCTTTGCTGTACTCCCTCTATCGCAAAGACATCTTTCCTCAGAAAGAACACTAAAGCTGCACACAATGCTCCAGGTACGGCCTCACCAATGCACTATACAATTGCAGCAAAACTTCCCTATCCCTATAATCAAATCCTTTCGCTCTGAAGGCCAACATTTGCCTTCTTTACAGCCTGCTGTACTGTCTCTCAATCAAATTTGAAATACGCAAATCATAGAATG…
TRINITY_DN72_c24_g1	AATCACACGATGTTTTGGCCTCAACTATTTTCTGAGGTAGTGAATTCCACACATTCACCACGCTCTTGGTGAAACTCTAAAGACAACTCACACACGATGGTCAATCTGGTTTCAGTCAGTCTCAGCTGAAACATATTCTTCTGACAATGCAGTCCTTTCTTATCTGATATAAGGGATCAGCTGGCACATAAAGGAATAATGTGTGACTGAGTACAATACTGCCCACACAGTAATGTAAGAGAACACATGACCCGCACTTAGGGGTCAATGTAGTGTTAGACAGAGCTGTGTGCAAATGCAAGCATGGAGACAGCCAACCCCTAGCTTGAACTGTTTACCATAGAATCCTTATAGTGCAGAAAGAGGCCTCTCGGACCTCCTCCAACTCTCTGAAAGAGC…
TRINITY_DN72_c25_g1	GGGAGAACGTGTAGACTCCGCACAGTGATCCAAGCCGGGAGTCAAACCTGGGTTCTTGGCGCTGTGAGGCAGCAGTGCTAACCAGTGTGTCACCGTGCTGCCCTAGTGAACCAGATGGGCTTTTTTTAACAACAGTCAGTGATAGTTTCATGGTTAGGGTTACCATCACTTACAGTAGCTTTCAGTTCCAGATTACTGATTTATTAACTGAATTTAAATTTCACTAGCTGTTGTGGTAGAACTTGAACCCATGGCCCCAGATCACTTGCCACCATCTCCCCTTAGTAGACTTATTACCATTACTGTTCCTGATTTTTTTTTTTAAATTGCAGTTATACAGTTCTTTCTATAGCTATTGAACATCATGAAAGGTTTTATAGCTGATAACAAACCTTTGAA…
TRINITY_DN72_c28_g1	AAAGAACAGTACAGCACAGGAACAGGCCCTTCGGCCCTCCAAGCCTGTGCTGATCATGATGCCCTAACTAAACTAAAAAAAACCTTCTTCTCTTACTTGGTCTGTATCCCTCTATTCCTTCCCTATGCATGTACTCAGCCTCTGTCTTTCCAGTGTAAACAGTTTATTCAACCTCTCCTCATAGCCAACACCTTCTAGACCAGGCAACATCCTGGTCAACATTGTTTGCACTTTCTCC
TRINITY_DN72_c29_g1	GGTTACCGTCTATGCGGTGTCTGTGTGGATTTGCTCCGGATGCTCCAGTTTCCTCTAAGAATCCGAAAGATGTGCTGGTTAGGTGAATTGACCATGCTAAATTCTCCCTCAGTGTATCCATACAGGCAGTAAGGGATTTTCACAATAACTTCAGTACAGTGTGAATGTAAGCATACTTATGACTAATAAATAAACTTTTTACTTTAGCAGCAGGCGTCAGTCAGAAAAAAATTCTCCCAATATGGAAT
TRINITY_DN72_c41_g1	TAATCTCGGACTGTGACCCCTGGTTCTGGGCACCCCCACCATCGGGAACATTCTTCCCGCAACTACCTGTCTAACCCTGTTAGAATTTTATAAATCTCTGAGATCCCCCCTCATTTGTCTGAATCCAGCGAAAACAATCCTAACCTAGACAATCTCTCCTCATATGTCAGTCCTGCCATCCCTGGAATCAGGCTGGTAAACCTTTACTGCATTCCCTCGGGAGCAAGAACATCCTTTCTCAGAAAAGGAGACCAAACTGCACACAATACTCTGGGTGTGGCCTCACCAAGGCCCTGAATAATTGCAACAACACTGCTCCTGTACTCGAAATCTCTCGCAATGAAGGCCAACATGCCATTTGCCTCTTTATCGCCTGCCTGCACCTGCATGCTTATCTTC…
TRINITY_DN72_c42_g1	GTTTCACTTGCCCTTTCCTGCAATAATAGTTTGCTTTTTTTAATCAACAGAATATCCTGATCATCAAATTGCACATTTTTTGGAGGTTTTTACATGGATCTTTTACCAATGCTTCTGTACATTTTGGATCAGTTTAAACTGGAAATCATAGAATCGCTACAGTATAGGAGGAGGCCATTTGACCCATCGAGCTTGCACTGACAACAATTCCATCCAGGCCCTATCCCCGTAACCCCG
TRINITY_DN41_c0_g2	TGCTAATGCTTAGAAGTAGACAACCAGCCTCACCAGGAGTGTGTGTGTGTGTGTGTGTGTGTCTCACATCCGGACCTGCAAAATAAGACATGCATTACAGGACATTTATTAGTACATTTTACAGACTAATTGTCAATATTTTATGTGGCCTTATAAGCAGCTGACAAGCAATGCTTTTTGCTCCCACACACTTCATGTCCAAAGAAGATCCTTTGTGGCACATTTTGGCATAGGCTGCACCATGTAAATCAAGGCACCTTATTCTGATCCAAGGCCTCATTGAATTGAGATTCCCAAGAGATGCATCCTGACACTTGACCCAAGAGAAATATTTTCAAGCCAATCAAGTGTAAAATAAATAACCCTGATGAATTGAGAATATCATAGGCAGCAAATATT…
TRINITY_DN41_c2_g2	CCATCCCATTCATCATCTTATATGTCTCAATGAGATCGCCCCTCATTCTTCTAAACTCTAACGAATACAAGCCTAGTTTATCCAGCCTAGTTTATTAGACATGGAAGCTCCTTTGCATGAATGACTTGGTACTGCACTAAAGGACGTAATAAGCCATGTGAGGAGATGAATACTTTTTATATGGCCACATTAATAGTAAGGAGAACAAGTAAGAAGGAAAACTTGGTAGTGGGGTATGAAAAAGGCCAGGAATTTGCTTCTGAATAGATGCACTACTGATAACTATTTCTCGTTCCAGCAAATGGACATGCACATGATGCTGAATTATTGGGGGCAAGGTTGGGAGGGGCAGGGAGGGGTGGTGTCGAAAGTTGGCAGGAATTAGGAGTAATTGAAGAA…
TRINITY_DN17_c0_g1	GTTCAGGGGCATTGAGACAGAATGAAACTGAAAGCTGGATGAGTCTCAGGAAATTGAAGCAGTTTCTATTGAACAAACATTCAGCATTTTAAATTCAGTAGGAAAGGATGTAAATCATTGTTACTGAAGTGAATATTCAGTAGGAAAGGATGTAAATTATTGATACTGAAGCAGACTGTAGAAGATTTCAGTTTGTCACTGCAGCAAGTTATCTGGAGACAGGAGTTATCTGGAGACAGGAGTTTGTGTTTTTGACCGGATGATTGAAGGCAGCATCTTTAAATAACAGTGAAGAAACCGGAGCACATTGAGAAATGCACAAAGACACTGGGAGAACGTGCAGACTCCGCACAGTGACAAACTCGTGTCCCTAAATTCCGCATTGCAAATGTCGTTCTG…
TRINITY_DN17_c1_g1	TGTCCCCATACATTTACCCTAGCTAGTCCCTCCTGACACTAAGGGAGAATTTAGCATGGTCAATCCACCTAACCCACATGTCTTTTTCCATGGGAGGAAACCGGAGCACCCGGAGGAAACCCACGCAGACACGAGGAGGAGAGCCCACGCAGACACGGGGGGGGTGTGCGAACTCCGCACGGGCGAAAACATGCAAATTCCCCACACAGTGACCTGCACTGGGAATCGAACGGGAGAGGGCCGGAGCGCCCGGAGGGGGCCCGCGCGGACGCGGGGGGAATGTGCAAACTCCGCACAAACAGCACACAGACAGTGACCCGAGCCGGGAATCGAACCCAGGACCCTGGAGCTGTGAAGCAGCAGTGCTAACCACTCGTGCGAACCCACTGTGGGTACCGT…
TRINITY_DN17_c2_g3	GCGTTGGACTGGGGTAAACACAGTACAAGTCTCACAACACCAGGTTAAAGTCCAACAAGTTTATTTGGAACCATGAGTTTTTGGAGCACTGCTCCTTCATCAGGTGACACTGTTGGACTTTAACCTGGTGTCCAATAGTGTCACCTGACCAATATCCTATCCTAGTAAGAAGTCCAACTTCTTACTAGGATATTCCAGAGCATTCCTCATTCCCCTCCCACACAGCTTGTTGGTGAGATGAATGGATGGACAATGCTGATGGCTTTGGGGTATGGAAGGATTGCACTCGATGTGGGGGAGGATGGGAGGGACAGAAGAACGGGGAGAGCAGTGATCAGCCCGCTGGTGGGTGGGGTTGGTGATGTAGGCTGTGGGTGACTGGATGGTGCTATGTTGGGG…
TRINITY_DN17_c3_g1	GTGCCCCGAGGGCTCGCTATTCCAGGTAAACATGTTGGACTTTGACAGCACTCCAAAAGCTAGTGGCGTTTACTACCAGGTTAAAGTCAACAGGTTTATTTGGAATCTCGAGCTAACTGTCCTGGCTTGAGACAATTCCCACCTCTTTAACCTGTGATTATCCCTCTCTCCAGTCACATTGTCTGTACCTGTAGAAACTTGATTACCCGTTAAAAACTTGCTCGCATTCCCATCATTATCTTGCAGTTATGTCTCTGCTTATATATATGCTGTGTTTGTGAACCCACCTGTCCACTCATTTGATGAAGGAGCAGCATTCTGAAAGCTTGTGATTCCAAATAAACCTGTTGGACTTTAACCTGGTGTTGTGAGACTTCTTACTGTAGTTTACCCCAGTCT…
TRINITY_DN17_c5_g1	CGCAAACTGCACACAGACAGTGAGCCAAGCCGGGAATCGAACCTGGGTCCTTGGTGCTGTGAGACAGCAATGCTAATCACTGTGCCACCTTGCTGCCTGTTCAAGCTATCTTACCCAACACTCAAGTGGGCTTTTGAATTGTATCACCATTCCACTGAAACATGAAAAATAACTTGTATCGATCCTACTACACCTACATCCTTTTACAAGAGTCTCCTCCAATTGACATCCAACAGTTGTGTTATTACCCTATGCAGTTTTTGACCTCAGCGATTCTTTACATTTATCAGTGTTAAATTTTATATTCGGCCAGTCTTCCTGTTATTTGTGCTGTGTTTATCAATATAAACACAGCAATATTTAAAATATTGTTTTTTTAAAGTAGTTTTCTCCTTTCAG…
TRINITY_DN17_c6_g1	TCTTTGGACTGAGGGGGAAAACCAGAGCACCTGGAGAAAACCTACACAGACATGGGGAGAACATGCAAAAACTACACAATTAGTGACCCAAGGCGGGCATCAAACCCAGGTCCCTGGTGCTGTGAGGTAGCAGTGCCAACTACTGTGGTACCCAAGATATCTGCTCCAAACTGAAGCGCACACTCACGATATAGCCTGCTACGGTATAAGTGCCATATGCTAATCGATTAAGCCACTGGAGCACAGTTCTCCAGAGCATACTTCAGAAAATCCTCCTGCTCATTATTCTTTGCTCTAACATTATTTCAATCAATATCTGAATAATTAAAAGTTCCTCAGTCTTTTGGTCTTGCAAATCTCTGTGATGTGTGCAGTTTTGTACCTCACTTCCTTACGTTG…
TRINITY_DN17_c7_g2	CAGACATGGGGAGAATGTGCAAACTCCATACAGAAAGCCACCCGAGGCCAGAATTGAACCCGGGTCCCTGGCACTGTGAGGCAGCTGTGCGAACCACTGTGCCACCCATGGGTCCTTCCCATTCACTCCGTCCAGGTCCCTCACAACATTGTACTCCTCAATCAAATCTCCTCTTAGTCTTCTCTATTCCAAGGAAAACATCCCCAGCCTGTCCCACCTTTCTTCATAGCTGCAATCTTTCCTTGTTCTGGTGAAAATACAATTTCTCACTATTTAACCTGTCGAATCCTTCTCAGTTGCCCTTTCAATCCTCTGAACTCAAGGAAATATATGTCAAACTTATGCAACATGCCCTCAGGAACTTTGTCAGATACTCAACTCCCCATGAAACTCCTTGGG…
TRINITY_DN17_c8_g1	TGCACCATGCAGACTCTATCCCCATAACCTCTGAGTCACCTGATGAAGGAGCAGCACTCCAAAAGCTTGTGATTCCAAGTAAACCTGTTGGACTTTAACCTAGTGTTGTGAGACTTCTTACTTAACTTGATAATGCCCAAATTAGACAGTGGCCTACAAAACAGGCTAATAGAATTTAACCTCTGTTGTAAATATTTACTGCTAAGGGGAATTAAATTGAATCTGCATTGTTAAAATGGCAAAATTTCATTTTAGATTACTGCATAAGATTTGCAGCATTTGCTCCAAACCAGCCTGTTAATGCTGCATGCAACCCTCCTCTCATTAAACCTCACCATATGAGCATATCCTCTGTTCATCCCGCATGTATTTATCAAACTTCTCTGAACTGGATTTCTG…
TRINITY_DN17_c9_g1	GGGCCTTCAAGTCACATGACAACGCAGAATCACCAAGGCACGCATGAGGACTGCCTTAACCGGGATCTTGGGTTCATGTCACATTACATGTAATTGCCATCATTTGGCCTGGGCTTGCAAAATCCTACAAACTGTTCTGGCTTGAGACAATTCATATCTCTTTAACCTGTGCTTAATCCTCTCTCCATTCGCATTGTCTGTACCTGTAAAGACTTAGTTACCTGCC
TRINITY_DN17_c13_g1	GTGCAATTCACCATGGCCAATCAACACATCTAGATTGTGGGAGGAAACCAGAGCACCCGGAGGAAGCTCACGCAGACCCAGGGAGAATGTGAAAACTCCACACAGTCCCCAAGGTTGGAACTGAATCCAGATTCCTGGTGCTGTGAGGTAGCAGTGCTTGTCAGTGTGCTGCCATGCTCAGTACTGTGATAGGTTGCCTATCTTACAACTCCATGCTGTTGGCCACTCTGTTCTGCGAAACATGCTTATCAGTCGAGTTCCACAGATTGCTGGGCAACTGGCTGAAAGAGCGGTACAGACTGTACTTACCATCACTGTCTGAGAAAATTTGCATGTTTTCCTCATTTTAATAATAAATATTGCATCTGATCTGTCTGGTGAGGGATTCCTGTAATGGTT…
TRINITY_DN17_c17_g1	CAAACCATAAATCCCCAGTAGCATCCTATTATGACAGTGTGAGTTAATGCAACTTGCATTCTAATCAGTATTCTGTAAATTGTGTGTGTCTTTATATGCCTTTCTCCGACCAGAACCTTCCACACACCTGACGAAGGAACACCGTTTCCGAAAGCTTGTGGGAAAAGCTTGTGGGATTACTATCAAATAAACTGGTTGGACTCTAACCTGGTGTTGGGACTTGTTACTATGAAATAAACTGGTTGGACTTAAACCTGGTGTTGTGAGACTTCTTTCTGTGTTTACCCCACTCCCAGGCTGGTAATTACTGTCAAATAAACTGGTTGGACTTGAGACTGGTGTTGTGAGACTTCTTATTGTGTTTACCC
TRINITY_DN17_c18_g1	ACATGGAGGGAGAATTTAGCATGGCCTATTCACCTAACCACGTCTTTCAGACTGTGGGAGGAAACCCACGCAGACAGCGTAAACTCCACATGGACAGTGACCCAAGCTGGGAATCGAACCTGAGTCTTGGTGCTATAAGGCAGCATTGCTAACCACTGTGAGTTAGGACACTGATGTGGATGTGCCAGCGTTGGACTGGGATAAACACAGTGGGAAGTCTGACAACACCAGGTTTTAGTCCAACCAATTTATTTCAAATGGGTCGGTTGG
TRINITY_DN40_c0_g2	TCAAATTTTTTAAAAAAAGTTTATCTATTAGTTACAAGTCAGGCTTGTCAGGCTTGCATTGGCACTGCAATGAATTTTAAAAAAAAGTTTATCAGTTACAAGTCAGGCTTGCATTGACACTGCAATGAGGCATTGGCACTGCAGTGGGGTTGCTGTGGGACATTAACACTGCAATGAAGTTACTGTGAAGTTGCTGTGGGGATTCCCAAAGTCGCCAGACTCCAGTGCCTGTTTGGGTCACTGCACCTAACCAGCACATTATTTGGACTGTGGGGGGAGGCCGGAGCGCCCGGGGGAGACCCACGCAGACGAGGAAACCAGAGCACCCAGAAGAAACCCACGCAGACACAGCCGGAGCGCCCGGAGGAGACCCACGCAGACACGGGGAGGACATGCAAA…
TRINITY_DN40_c6_g1	CTTTGAAGTGTGAAGGAAACCAGAGCACCCAGAGGAAACCCATGCAGACATGGGGAGAATGTGTAAACTCCACACAGACAGTGACGTAAACCGGGGATCGAACACTGGTCCCTGGCATTGTGAGGCAACAGTACTCACCACTATGCCACCATGCAGCCATTTTTTGAACAGCCATGGTATTAGAGCTCAGGAAAGTTTTGCCAAGAGACATTTGGAAACTCAAAGTGCAGCCTTTCTGACCGTTTTTCCATGTTTTAATAAACCATTAGCGCATTGATAGTTCAGCAGCTAGAACACAGGATGCCCAACCATCAGCAGTGGTGGAAACAAAATCCGTAAGAGCTTTTTGAATCATATTACACACTGCTCCTTGTGATTCATGAGTGGCATTGCCTTTTT…
TRINITY_DN40_c7_g1	AAGAATTCTCACAGTGCAGAAATAAGCCATTCGTCCCATTGAGCCTGTGCTGAATTAACCCCATCCCAGCTCTATCCCCGTATGCCCACAAATTTGTCCTACTAATCCCGCTAACATTAAGGGGCATCCTTAGACTGTGGGAGGAAACCAGACCGCCTGGATCAAGCCCAAGCAGACACAGGAAGAATGTACAAACTCCATACCGAGAGTCACCCAAGGTTGAAATTGAACCTGGCCATGGCCCAGGGAAGCATCAGTGCAAACCACTGTGCCAATTTCTCTGCATTCACCCTGTCAAACGCTTCCAGAATTTAATGAGATCGCCCCTCATGCTTCTAAACACAAGAGAATATAAGCCCAATTCACTCATCATAGGACAAGCCCCTCATTCCAG
TRINITY_DN5_c0_g2	GGTCCCTGGAAGCGTAGGGGGTTTTAGTTAAGTCAGGCAGCATGGTCGGTGCAGGCTTGGAGGAGTGAAGGGCCTGTTCCTATGTTGAATTTTCTTTGTTTTTTGTTCTTGAGGGCAAGATGATCATCTACTCAGCACTAAAGATGATTGCAAATTCTTCAGCCTTGTCTTTTGCAATGGTGTTCTGGGCTTTGCCCACTTTCAGCTTGGGGCTAGTCAGTTGATTTAATTGTCCACATCTGGAAATGGTAAGACTGCAGAGATTTGATCTGATCCATTATTATTGGATCACTTAGCTGCCTTTTGTGTGCTGCTTCAGTTGTTGACATACATGAAATTGTGTCTTGATGCTTCCCAAATTAGTACCTCATTTTATGATATGCCTGGCGATGTTCCTAG…
TRINITY_DN31_c1_g1	GGGGGAGGCGCGAGGGGTGGTGGGGTGGGGTGTGCAGAACCTTAAAGTTGGAGCCAGGCCTTGTTCAGGAGTGGGGTCAGAGAGAGCTCCCTCACACAAAGAGCTCTGATTTGATTTATTATTGTCACACGTATTGGGTTACAGTGAAAAGTATTGTTTCTTGCACACGATACAGATAAAGCATACTGTTCATAGAGTAGAGC
TRINITY_DN81_c0_g1	ATTCTCACACACACACACACACATTCTCACACACACATTCTCACACACACACACACACACACAGATTCTCACACACACATTCTCACACACACATTCTCACACACACGGGCTCACTCGAGGTTGCCGGATAGTGATTAGGTTCCTCAAGAAGACCTACGACACAGCCGACAATCCCACTACCGCTTATCTTGGGATCTTCCTGTGTGAAGAATGTATATCAGAGGAGGTGGGCTCAGCCCAGGGAGAAAGCTGCAGCGAAGCACGTCCCTGTTATTGTGCCGGAATTCCACCCCCTTTGCGCTGAGCTGGGAAGCCTGGTGAAACGGTGAGCATTGGGAATGGTCACACAGCATCTTAGCCCAGCCGTTTGAACGGGAGTGTCTGAGAGTGGGACAGAGA…
TRINITY_DN81_c0_g2	GTTTCTATGAGATCCCTCTCACTCTTCTAATCCTAACCGACTCAGTCACAATTCTGCACGGTCAATCCACCTAACCCACACATCTTCGGACTGTGAGAGGAAACTGGAGCACCCGGAGGAAAGCCACACAGACACAGAGGGAATGTGCAGACTCCACACAGATGGTGACCCATGGCTGGTAATTGAATCCGGGTCCATGGCGCTGTGAGACAGTAGTGCTAACCCACTGTGCCACCTGTTTCCTACGTTACAACCATGGCTCAGCTTCAGAAGTACTGTGACCCCCTAGTTCTGGACTCCCCCAACATCGGGATCATATTTTCTGAATCTACCTTGTCTAACCACGTTAGAATTTTATAAGTTTCTATCAGATCCCCCCTCACTCTGATAAACTCCAGT…
TRINITY_DN81_c0_g3	TATTTATTAGTCACAAGTGGGCTTACCTTAACACTGCAGTGAAGTTACTGTGGAAATCCCCTACTCCAGGGACACACTCTGGAGCTGAAGAAACAGGAAGTGACACTGGGGAGGTGTGAGAAATACAAAGTGTCTCGTTCCCCACTCCCTGATGGTGCTAGGTTTGATGGGATTGGCTGGAGGGTTCGAGTGGCCTACTCGTGTTCCAGTAACACACGCAAATATTGGAAAGATTAAACAATCGAATTAAGGAATAGACTATTTTTCTGAAATATGACCCATGTTGTATTACTCCACAGCTGTGTACATATATCTTTCCTAACTCTTGCAAATGTATTCCAGACAGAAAAAAAAATTATCTTAAATGAAAATAGATTTATTTTTTACAGTGTTTATGGT…
TRINITY_DN81_c2_g2	GGAACCCACGCTGACACAGGAAGAACATGCGGAATTTGCATATTCTTTTTAAAGTTTATTTATTAGTCACAAGTTGGCTTACATTTACGATGCAATGAAGTTACTGAAAATCCCTTAGTCGCCACACTCCGGCACCTGTTTGGGTTACACTGAGGGAGGATTTAGCACAGCCAATGCACCCTAACCAGCACGTCTTTCAAAGGGAGGATTTAGCACGGCCAATGCACCCTGGCCAGCACGTCTTTCGGACTGTGGGAGGAAACCGGAGCACCCGGAGGAAACCCACGCAGAGATGGGGAGAATGTGCAGACTCCACACAGACAGTAACCCAAGTCAGGAATCAAACCCGGGT
TRINITY_DN81_c2_g3	CTAAAGTAGACTTTAACCTGGTGTTTGAGACTTCTTACTGTGCCTAACCCAGTCCAACACTGGCATCTCCATGTCTTGGCTCTGAGTAACTCTAACTCCAATTCTCCATAATGGCTCTAAAGTCAAAGCCATTAATTTTTATCTGTGCTCATGATTCATCTATTTTGTTGCAAATGTTTCAGGTTTTCAAGTATAATGCTGTTAGCTCTTTTTTATTTCTGTAGTTTCCAGACAGCACCCTAGCCACTTTGTTGAGTTCTCTGTTCTTTCCTGACCCGCTCTGCTGATAATTACCCAAACTGCTACTGTACTCTACTTCAACATTTCTGTTGCTTTTGAATTTACCTTTTCCTGAATCGTCCTACACCCGTTCAATAGATTAAGCCCTGTCTACCATTT…
TRINITY_DN81_c3_g1	GGCAAACCTTTTAGAACTGAGGGGAGCAGAAATTTCTTCACCCAGAGAGTAGTGAATGTGTGGAATTTACCACCACAGAAAGTAGTTGAGGCCGAAATTTTGTCTAATTTCAAGAAGAAATTAGATATAGTTCTTGAGGCTAAAGGGATCAAAGGATATGGAGGGAAGGGGAGGGGATCAGGATATTGATCAGCCATGATCATAATGAATGGTGGAACAAGCTCGAAGGGCCAAATGGGTCACTCCTGCTTCGATGTTTCTTGGCTGACTCCCCAACACACTGGCTGCACCATAGAGGTTGTCATCTTCTGAGGACATGTCTGCCCTCTTGTGTGACGCTAACAATCTAATAATATTTCAAAGAAGAGCAGGGGGGTCCTCCGCAGGGTCCTGGTCAAT…
TRINITY_DN81_c3_g2	GTTTTCTGAGGAAGGATGTTCATGCCCTCAAGGGAGTGCAGTGAAGGTTTACCAGGCTGATTCCAGGGATGGAGGGAATGATGTAGAGGAGAGATTGACTAGGTTAGAATTGTTTTCGCTGGAGTTCAGACAGACGAGGAGGTATCTCACAGAGACTTATAAAATTCTAACAGGACTAGATAGGTAGATGCAGGGAGGATATTCCTGATGGTGGGGAGTCCAAAACCAGGGGTCACAGTGTGAGGATTCAGGGTAGACCATTTAGGACAGAGGTGAGGAGACATTTCTTCGCTCAAGGAGTGGCG
TRINITY_DN81_c4_g1	GCTAAATTGCCCCTTAGTGTCAGGAGGACTAGCTAGGGTAAATCCGTAGGGATAGGGCCTGGGTGGGATTGTGATTGGTGCAGACCTGATGGGTCAAACGGCCGCCGCCTTCGTTGTAGGAATCTATGATTCCATATCAAGGCATGGTATTTTGCTTGATTTATATTGTGCAATTAATGCGACTCCTAGCAAAATCTAATCAGAAAGGTCACCTTATATGTTGCTAATATGCAAATAGAGCCTTCTGAATAATGTGTTCCTTGCGTCCCATGAATGAATGGATAAAAAATTGCTCCTGATTTGAGCAATCCAGTCCCAAATTATTATTGAGATTTTCTGGCTGCATTCATCCCAAAACCGGAAAATCCCACCTGAGGTCACGGGACCTTTCTGTGACCT…
TRINITY_DN81_c5_g1	AGAATATTCCCAATGATGGGGGAGTCCAGAACTAGGGGTCATAGTTTGAGGATAAGGAGTAAACCTTTTAGAACTGAGGTGAGAAATTTCTTCACCCAGAGGGTGGTGAATGTGTAGAATTCACTACCACCGAATATAGTTGAGGCCAAAACGTTGTCAGATTTCAAGAAGAAATTAGATATAGCTCTAGGGACTAAAGGGATCAAGCGATTTCAGGGAGAAGGGCATCAGGATGTTGAATTCAATGATCAGCCGTAATCAAAATGAGTGGCGGAGCAGGCTCAAGGGGGTGAATGGCCTACTCCTGCTTCTAGTTTCTATGTTTCTATTACTGCAATGTAACTTTTTATGATGATATTTGTGATATTCATTGCAACATTTTGCTATATCTAGTGCAGA…
TRINITY_DN81_c6_g1	TCAGACACAAACTCAATTTACAAGGTAATGGTTGGGATGCGAGTCTTTACAGGTAATCAAGTCTTAAAGGTCTCCAGCCAGGACTGTCCTAGCTGGAGACAATACACACCTCTAACTTGTGCTTGGCCCTCTCTCCATTCATATTGCCTGTACCTTTTTAAGGCTTGATTAGCTGTAATCAAATGGACTTTAACCTGGTGTTGTGAGACTTCTTACTGTGCTTATCCCAGTCCAATGCTAGCATCTCCACGTCA
TRINITY_DN81_c7_g1	TAAAGGGATCAAGGGATATGGGGGAGGGAGGGGGGGATCAGGACATTGAATGTGATGATCATCCATGAGCAAAATGAATGGTGGAGAGGCTTGTAGGCCTGAATGACCTACTCCTGCTTCTAGTTTCAATGTCAAGGTATTCAGCATTATGGCTGAAAGCGTGGAGGACTCCACTTCCAGCTGACCTGGCATCGTCGGCACGGTATCAGCACTCTACCAGGTGGTCATCTCCTACAGTTGAGCCACCCAACAGGAATTTCCACTCTCAAGCTTTGCAAATCTCTGTGGAAGTCAAACTTCTGCAGTGTTGGAGAGGTAGAGATCCACCTTGCAGCAATTGGTAGAGCAAATAAATAATGACCTTCAAGCAGTCAATCATCCTTTTTCAGCCCTACTCCC…
TRINITY_DN81_c9_g1	CTCCCCACAGGCACTAACCCGAGGCTGGAATTGAACCCGGGCCTCTGGCGCTGTGAGGCAGCACTGCTAACCACTGTGCCACCAGGCTGCCCTTGCTGACTGCCTTGACTGTATTTGCTTGGTTACCAATCTTTAGATGGGCTAAGTTGAATCTCTGAAGCTTCTGATCAGTCTGGTCTCCCAAACAAATGAAATGAAGACATAAATTAGGCTCCAAATCACCTGAATTTCCCTGACTTCTGGAGCTTCATAACCCCTACTTTCTCAGAACTACTTTGCAACATTACCCGGTTTGACATAAAGGCTGGAACTTTACCAGCCTGCTCACCCTAGCAATTGGAGAGCGCAACATGGAAAAGTCCGCTGATCTCGGGCAGACTTTTACAGTTTTGTGACAAG…
TRINITY_DN81_c10_g1	ACGCAGACATGGGGAAGGTGTGCAGACTGCACAGGCAGTGACCTAATATGAGAATTGAACCTGGGTCCCTGGCAGTGTGAGACAGCAGTGCTAAGCACTGTGGCGCCGTGCCAATAACAGCGCAAAACTTGGACTTCACACCCTTGATCTTCGGGGAATTTGGCCACAACCCATGTTCTTGATCATAATTCAGTGATGCCACACCCCCCCTGCCGCTGGAATTGTGTGTGTGTGTGCATTAGGTGAGGGAGCAATCCAACTTGGATCTAATGCACTCCCGGATCAAATAGCTTGCTGACTCTTTTTGCAATCAATATTCAGACTTGATTATCGAATACTTATGCAAAGCACAATGTGTCTGTGGCACCAGAGCTTTATCTGGAGCAAACCTGTGAGAAC…
TRINITY_DN81_c12_g1	GTGGGATTGTGGTCGGTGCAGACTATTTGGGCCAAAGGCCCTCTTTCTGCACTGTAGGGTTCTATGATTAATTGAATTGTTGTTCAGTGTAGTGGGTATTTTTGGGAAGAAGGAGGGCACATTCATGACAGCAACAACAAAGTATTTTCTCATTGCATCTAATGTCATAAAGCTCTTGAGCTGATATGTATTTAGAAGGAATAAAATTGTGAAGCTGAACGTAGCAGCAATGGGATCTTTTCTAACCTGCAGATCAATTAAATGTAGTTCTGACAAATGGCTGCTTCTGAATTATTAAGCTAACTTCCTTAGTTGCTGATTAGTTCCATTTCTAGCATCTTCTGTTATTTAAAATTTCTCATGTTTTTAATCTCTGCAGAGGAATCCAGATCAGTTGTT…
TRINITY_DN81_c17_g1	CGGGTTTGCACCGACCACAGTCCCTTCCAGCCTCTATCTCCATAACCCCATGCATTTACCCTAGCTAATCCCCCAGTTGCTAAGGGGCAACTTAGTCAATCCACTTAACTTGCACAATTTGGACTGTGGGAGGAAACAGGAGCACCCAGAGGAAACCCACGCAGACACGGAGAACGTGCAAACTCCACACAGATAGCAATCCAGGTTGGTAATCGAAC
TRINITY_DN44_c1_g1	AACAAGGAGACAAAGCTACAACATACAGGGTCAGTCATTTAAAACTGAGGTGCATGGAAATTTTTTCTTGGTGGTGAATCTCTGGAATTCTGTTCCAAAGGGTAGTGGAAGCTGGATCATTAAAACATTTAAAGGGGATAATAAGTGCATAATAGAATAGAGGACTATAGGGAAATGGCACAGAAAAGGAATTGTGGCTGGCATAGATCAGCCATGATAGTATTGAAGGGCCTGATTGCCCACTCTTATTTCTTATATGCTTTTTTTTTTACAGCTGTTCTATTTTGCCAAGCTGTTCTATGCTGATTTTGAACTGTTTCTAGTTATTAACTGATGGCCTGTTTTATTTGACCATGTGTGTATTGGGTCTGTTTTAATGATCAAAGTCAGTAACTTCTA…
TRINITY_DN74_c2_g1	ATTGACCCAAACCAGTTCCGGAGTGTGGTGACTAGGGGAATTTCACAGTAACTTCATTGTAGTGTTAACATAAGCCTTACTTGTGACTAATAAGTAAACCTTACTTCTATTTCTACTTCGGTGTATGTTTTATCGTCTTCTGCACACTTTCTCTTTATGCTGTTCCTTTTAAATTAAGAATATCTGCAGAATACCTATTTGGACAAGGGTTGACAATATTAATGTTAGTATCATGTATTTATTTAGCACCTTTGATGTAATAAATATTTCCAAAGGCAC
TRINITY_DN56_c1_g1	CCAAAAGAATTTCAGCTCGATCAAATACAAGGAAGGTGTTGGTCAATCGATCAAATACAAGGAAAATGTTGGTCACGGAACCGCAATCTCTGACCTTCCTGAGGTGAAGCGTGTGAAGGAGACACAGAAGAACATCAGCTCGATCAAATACAAGGAAAATGTCGGTCACGGAACTGCAATCTCTGACCTCCCTGAGGTGCAGCGCGTGAAGGAGACGCAGAAGAACATCAGCTCGATCAAATACAAGGAAAATGTTGGTCACGGAACCGCAATCTCTGACCTTCCTGAGGTGAAGCGTGTGAAGGAGACACAGAAGAACATCAGCTCGATCAAATACAAGGAAAATGTTGGTCACGGAACCGCAATCTCTGACCTTCCTGAGGTGAAGCGTGTGAAGGA…
TRINITY_DN22_c1_g1	GATGGAGGGGGAGCGTTCCGGGAGTGGGTGCCTTGTGCTGCCAGGTAAAGCTGGGGTCCCACTCACCTGGTGGAGGGGCAGCGTTCCGGGGGTGGGTGCCTTGTGCTGCCGGGTAGAAATAAACCTGTTGGACTTTGACCTGTTGGACTTTAGCCTGGTGGTGTGAGACTTCTTCCCATTGTCTCCAGCTAGGACAATAACTTGCAATGACTCACATTCCAACCATTATTTTGTAAATTGAGTTTGTGTTTTTATATGCCCTGTTTGTGAATAGAATTCTCACTTACCTAATGAAG
TRINITY_DN22_c3_g1	TTTCAGAGCGCTGCTCCTTAGGTGAGTCACCTGAGGAAGTTCATGTAAACCTGTTGGACTTTAACCTGGTATTCAATTGAAAAGTTAAGATGTGTATCGGGCACCATGAAGACACCATTAATGTAAACCATTGGTGTGGAACAAGCTTGTAGTGAATCAGCAGCCTGTTACACCCTGCGCCAGGCTTTATTTTCTGTGGACTTGAAGAGTACTACCATGATTTTTAATTTCAAACCAGATAGAAGTGGCAGTGAGACTGGAAGGCAAGTCCAATAATATTTGGGAGTATAGTTTTTGCACTTTAAAAAGAAAAAAAGGTTTGGATTTATATGGCGCCCTTCGTGACTACTGGATATGTTTTACAGCCAATGAAGTGTTTCTGAAGTGTTGTCACTGTTG…
TRINITY_DN22_c4_g1	CCTGATGAAGGAGCAGCACTCCAAAAACTCATGATTCCAGGTAAACCTGGTGGACTTTAGCCTGGTGTTGTGAGACTTCATACTGTGCCCACCCCAGTCCAATGCCAGCATCTCCATGTCATTGAGTACATGTTCCACATGTGAACTTTCACCAAGGGGCCAATGGTTTAGATGGTAATAAGTCAGAACCGTATGTGTAATATATCCATAATCGGTGAAACCTGACCATTCTTGAATGTTTATTATCTTTAATTGTGATGGTCAGCTTTTATGAAGCTGCAGTGAAAGAGTAACATTTATAGATGTTTAGATGCAGATGCACTATGTTTTAATGGCTTCTGGTAACGCTACATGTAAGATGACGAGTCATTCAGAATCATTTCACAGAAGGATAGAACT…
TRINITY_DN22_c5_g1	GATCTGTCATGGCTCAGTTCCACCTTCCCGCCCAATAAGATCATGGCTGATCTGTCGCTGCTCAGTTCCACATTCCCACCGTCTCCCCATAACCCTTAATCCCCTCGCTTATCAAAAACCCATCAACCCGCTTCTTGAAAATATTTAGCGAGGCAGCCTCCACCACTTCAATGGGCAGAGAATTCCAGAGATTCACCACCCTTTGAGTGAAGAATTCCTCTTCAACTCCGATCTAAACTGCACCCCCCCCCCTCTTTATTTTGAGGCTGTGCCCTATAAAACTCCTGAGATGTCTCGCAGCCCCGGTTTGGGGTCCAGCAGGTCTGTTTGGAAGTTTGGAGTCCAGCAGGTCTGTTTGGGGTGGCGAGCTTTTGGGGCGCTGCTCCTTCCTCAGATGAG…
TRINITY_DN22_c7_g1	CGGATGTCCGTGACCGCTGAAGTGTTCCCCAAATCTACCAAATAAACCTGGTGTTGTGAGACTTCTTACTATGTTTATCCCAGTCCAATGCCAGCATCTCCACATCATGACCTCAGTATAATCACAGTGACTGAGCCAGCATTGACAGAGTTTAATCTCAACCCAATGATGTGAACGATTTATTGAAAATGTGCCTGATATTGTGTTATTCTCTTGAGCTGCTTTAACTTTACAAGAGCCTTAGAATCTGGTGTGTCTGTAAACTACCCTCTGTTGGTTTTCACAGGAGATTGTAAATTATAATGGCCTGGGTTTAAATGGAACAATTCAAACCATCTCAGATATTTCACAATGCCAGATTTTACAATTTAACAAGCAGACATCTGATGTCACCTTGAC…
TRINITY_DN22_c8_g1	AGCGCTTGAACTTCAGAACGATTGCAGCTCTGGATCTCAGAATTGTAAAATTGAGACATTACAGGTTGAAAAGTGAGTGATTCAACGGAACTGTGCGTTTGAAGGTAGGATGAAAAGAGGTGGACTTAAAAGTAATCAGGGCAGGATGGAAAATCAATTAAATTGACATTGGCACTCTGGTTTGTGCACATATCTATTTTTAAGAGGAGAAAATCAGTATTTTTGAAGCGATTTCTTCTGTTAAATGAGATTAATCCAACATGTTCAGCCAGGATGTGCCAAAAAGTTCTGATTTTGGAAAAGATCAACAAATCACAGATAATCCAGTCAGTGTCCTCCTTTCAATCAACCCAGAGAGCTTGAGTAGCCCCTGCACATTCACCCTGACCGTGAGGCAGT…
TRINITY_DN22_c11_g1	CTAGGGGGCACAGCCTCAAGATAAAGGGGGAGCAGTTTAGAAAGGAGTTGAGGAGGAACTTCTTCACTCTCTGCCCGTTGAAGTGGTGGAGGCTGCCTCACTAAATATTTTTAAGACGCGGGTTGCTGGACTGAGTCTGCACAATTCCCTAATAATAGTCACTTCATAGTACAGACTATCACTGTGATGCCTTCTTGTTCTCAGGGTCCCTCTTTTACTCATTTGCTCCACCCCATCCACCGCCTTCCTACCTCTCACTCCCCTCGCCCCCTGCTTCCTTCCTCCTTCTCCTCCCTCCCCCCCTCCACCCA
TRINITY_DN6_c1_g1	GTCGCCTTGACGAAGGAGCAGCGCTCCGAAAGCTCGTGATTCCAAATAAACCTGTTGGACTTTAAACTGGTGCTGTGAGACTTCCCAGCCCAGTCTAACACCAGCATCTCCACTTCATTGTAAAACCGGGCATTAACATGCCACAAAACTGATATAAAAGCCACCATCTCTTGTCCCACTCCTGTGCGTTAAGCTTACGCGGCTTTTAAAGTCAATATTTAGTGGTTTTTTTCATAAAGTTTGCACAATTCCACAGGTTTCTGAATGTCTTTGCCAGAGTGTTTGCTGTTCTTGCTTGTTGTGAGCAAGTTAAAAGGAATCGATTCCCAGACTCTGGGATTCCCTCAGTGCGTCACAGATTAACCCCCTCAAAAAAATTATTTGGCAGTAGTGTTTTTC…
TRINITY_DN6_c2_g1	TCAGGAAACATCTCTGATACAGCACAGGGCAGTAAAATCTACAACAGCAGGTTAAAGTCCAACGGGTTTGTTTGGTAGCATGAGCGTTCGGATTCTCACTCCTTCAGGTGAGGGAGCTGGACTCTGAAGGCTTGTGCTCCCAGGAGACTCTGAAGGCTTGTGCTCCCAAATAAACCTGTTGGACTTTAACTTGGTGTTGTGAGACTTCTCACTGTGTCCACCCCAGTCCAACGCCGACAGCTCCA
TRINITY_DN6_c3_g1	ACCATTATTTTGCAGTTGTGTTTTTGTCTATATGTGCTGTATTTGTGAGCCTGTCTCTCCGCTCACCTGGTGGGGGAGCGGTGCTCCGAAGGCTCATGGCTACAAATAACCTGATGTTGTAAGATTTCTTACTGTGCCCAGCCCAGTCCAGTCTAACACCAGCATCTCCACATCATGAGAGTTAGATTGTCAGTGGTTACAGAACTATGCAATTGATTAGCAGAGAGCATAATCTGCCCCACATAGTCCTTATCTGGTCTGTGATGGGATTGAAAATGTCTTCATCTTTACCAGCTGCAACCTCATCTGACTACATCAAAACTTCATCTCTCAACAGAAATGGAAAACGAGCACGATTATATCTTAAAGGGAGCTGCACAAGTTATATAACTATGTTGC…
TRINITY_DN6_c5_g1	ACTTGGGAATACCGCTACCTAGATTCCCTCTTAGTCACACACCATCCTGACTTGGAAATATAATGCCTTCCTTTTGTTATCCTTCCCTAACAGCACTGTGGGTGTACCTACACCACAGGGAATGTAGCGATTCATGTAGGTGGTTCTATACCATCTCCTGTACCATCTTCTACAGGGAAATTAGGAATGGCAAAAAATGCTAGGCCTTACCAGAGATGTTCACTTCCCCACTATTTCACTAATTAGTTCTAATTAGTTCTAAACCCACAACCACTTCTATCTAGAACAAGAAGGTAGATACATGCTAAGATAACCACCTGGCAGTTCTCCTCCAAGCCACTTGGAACTACATTACTGTTCCTCCATTGTTGCTGGGTTAAAATCCTGGAACTCCCTCCC…
TRINITY_DN6_c6_g1	GTGGGAGGAAACTGGAGCACCCAGAGGAAACCCACGCAGACATGGGGAGAACGTGCAAACCACATATTCACCCAAGGCCGGGATTGAAACTGGATTCTTGGCGCTGTGAGACAGAAGTGCCACCATTCCACCTCTATTGGGTGAGAAATGAGTCAGGTAAACCCTGACAGACACTAAAGGTGGGGTGCCTTTTTGGGCACTTGTTGGCCCACAAAGGAATGCCCTATCTGCAGTCACCATTGCCGTGCATTGGTGTTGCAACGCCCTCAGTGACCACTACCCCTCCCACTCACCAGAGCCAGCCTGAAGGACCCTGAAACTTCCAGACCCCACTTCCTGTGCTCGGAAACTTTCAGGAACCATCTGATCTTGCAGCCTCTTCTTCCAGATGTAATTCCA…
TRINITY_DN90_c0_g2	AAGCAAGCTTGTTTGCTTGTGAGAAGATTGTCGGGTGGATCGGTTGGACTGAAGCCTGGTGTTGGTTGTTCAAAAGAAAGTGTAGCTGGAAATAAAAGAAGAAAAAGTTGAAAGCAACAACGGAAATTAAAGAGATGACTTAAGACGATCCATCAGACACATCGCGTGGGCCTACTGTGTTTACGCCAGTTCTAAAGCAGTGCCGTTTTATCTAGAAACCTGTCAGACTTTTTACTGTGTCTACGCCGGTCCAACGCCGGCATACCCACATCACAATTGCACAAAGCCAGCTTCCGAGGGAACTGCTACCATTTACGAAAGGGATTTTTTTTTATTGGGGAAAGAGCTGTAGATCTCCATTAGAGAATTTGGCGCATTACTTTGGATATTTCAGGAAAA…
TRINITY_DN82_c0_g1	CTCTGATGGGTTTAGCTGGTGTTTGGGGCTCTGATGGGTTTAGCTGGTGTTTGGGGCTCTGATGGGTTTAGCTGGTGTTGTGTGGATGGAATGTTCAATCGTAGAAAATTTATGATTGAGAGCAAGGCCATTCAGCCCATTGTAATCCTGCCTGTTAATGAAGAACTCTCCAGCCTAATCTCACCTTCCTGTACTTGATCTGTAGCTCTGTGGATCACAGCTCTTCATCTCGACATCTATGCGTTGATTCAGTGTGGTGAGAGTTTCTGCCTCTACCATCCTTTCAGACAGTGAGTCCCGGGTCCCTACCACCCTCTGGTTGAAAAACTCATTCCTCATTTCCCCCCTGATCTTTCTACCAATAATTTTAAATCTGTGCCCCTGGTTTTTGGCCCTCTG…
TRINITY_DN54_c1_g1	ATATGGGGATAAGGCCTGGGTGGGATTGTAGTTGGTGCAGACTCGATGGGCCAAATGGCCTCTTTCACACTGTAGGGTTTGTATGATTCTATGAAAGACAGCAACTCCAGTGCAGCACTGGGAGAAGCAGCCTGGATTCAACGTTGCCTGCAATGAGACCCAAGTCCACAACCTTCTGAGTCAGATGCAAGAATACCAAGCACAGAGACACAGCTGGCACCAAGGAAATGCAGCAGTAAATCTCAGCACTTTATTCAGAAACCAGTAGTCGTACAAAGAGCCCATTTACATGTTGCTGAGTCATGGAAGAAAATGGCTTGTAACATTTACTTATTTTGCGTTATATGCAGTACCATACCTCTCTTTTTAAAATACATTGGAATGAGTTGATGTCATGTT…
TRINITY_DN54_c2_g2	CCCAAGCTGAGAATCAAACTGGGTCCTTGACGCTGTGAGGCAGCAGTGCTAACCACTGTGCCACCGTGCTGCCAGTGGGAGGAGACTCCAGCAGTTCAGCCTGTTTCTGTGCCACACAGTATTCGTAACCCAACGAATCAGCAGTCTGGAAATGACTTAATCCTAACCCGAGCAACCAAAGTTTTACACCTGGAAATGACTTAATCCTAACCTGAGCAACCAAAGTTTTACTATCAAAATATAAGTCTATTCTTTTCTGATTTGTTCATGTTTTATAATACAGTGACAGTGCCAATTGAAGCTATTAAAATTTCCAGTTTCATCAGCAACAAAGCAGTGCTTAGAATTTAAACCCTTACCCATTCATTGACCAGTGTTGATGTGGAGATGCCAGCATTG…
TRINITY_DN54_c3_g1	AGACAATACACATTAACCTGTGCTTAACCCTCTCTCCACTCACATCGATTCACTCACATTTCAACCATTATCTTGTACCTCTCTCCACTCACGTCGATTCACTCGCATTTCAACCATTATCTTGTAAATTGAGTTTGTGTCCATATCTGCCCTGTCTGTGAACACAACTCCTCACTCACCTGAGGAAGAGGCCTGAGACTCCGAAAACCTGTCCTACCAAATAAACCTGTAAAACCTTGTGCTACCAAATAAACCTGCTGGACTTTAACCTGGTCATTGTGAGACTTCTTACTGTACAGGAGAGGAA
TRINITY_DN54_c4_g1	GTTGAAGGAACAGCGTTCCGGGGGCTTGTGTGTTTGCTATCGGGTGGACCTGTTGGACTTTGGCCTGGTGTTGTGAGACTTCTGACTGGAGGCAAAAGTGCCAGTGGCCCCAGTCCACTGAGTTGGAAACAAATTTGTTGAAAACACCAGGCTGGTCTCCATCTGTTGCCTTTTCAAGCGTAACTGTGTCCTTGTTATCCATAATGCATTTCTATCGTGGAATGGATTGTGGAGGGTGGGTCTTTTGTACAGTTCCTGGGCAGTGGTATAAATGTGTGTGTAAAAAAAAAATTATTCATAACATGAAGAGCATAAAATTCCATGAACCACTTTAAAAGACCAAGGTAAATGAAAGCTTTTACACTGATGAGGTCTCAATGTTCAGGGGTATTTATTATC…
TRINITY_DN54_c5_g1	CACCATCCACCAGGTACATGGTACATACTCTTGCAACTTGGCCAACATTGTCTATCTGATACGCTGCAGGAAAGGATGTTCCGAGGCTTGGTACACTGGGGAGACCATGCAGATGCTATGATAACGAATGAATGAACCACTACGACAACAGATGAATGAACACTGCTCGGCAATCACCAGGCAAGGTGATTGTTCCCTTCCTGTTGGTGAACACTTCAGTGGTCACGGGCATTCGGCCTCTGCTCAACAATCACCAGGTAGGGGTGTTCCCTTCCAGTTGGGGAACACTTCATCAGTCATGGGCATTCAGACTCTGATCTTCGGGTAAGCGTTCTCCAAGGCGATCTTCACGACACACAGCAATGCAGAATCACTGACCGCTCAACAATCACCAGGCAG…
TRINITY_DN54_c8_g2	CGTTCGGCCTCTGATCTTCGGGTCAGTGTTCTCCAAGGCAGCCTTCACGACACACAACAGCACAGAGTCGCTGAGCAGAGACTGATAGCCAAGTTCCACACACGAGGACAGCCTCAACCAGGATCTTGGGTTCATGTCACACTTTCTGTAACCCCCCAATAACGACTTGCCTGAGCTTGCAAAATCTCACTAACTGGCCTGTCTGGAGACAATACACATCTCTTTAACCTGTCCTTAACGCTGTCTCCATTCACATTCTCTGTAC
TRINITY_DN54_c9_g1	AAACGAGAATGGAGGTATATGGTAGGGGATATTAAATAGGGTTAAACCTCGGGAGACACCGGAAAGGCAGACTGTAAGATTAATATTTTTGACTTTATTCCACAGGTGGAGGTCCACCTCGTGTCAAACGAGGGGCATTCACACGGCGGGTCGTGCATGGGCTGCTCTTGGAAGTTCCAGGAGTGGCTTAGTACTTCATGTTGGTGTGTG
TRINITY_DN54_c13_g1	GTTATTGGGGAAGGTGCAGAGGAATGGTTATTAATTGGATAGCTCTTTCAAAGAGCAGGCAAAGGCACGATAGTCTCCATGTTGCAGCTTTCATTCCATTAGCAGTTCTGCTGGGGCTGAGGGAGGAAGTTTTTGATTCTTGTGGCATAGGTCGCACTGTCTGTGATGTCTGAGTTGAGGCTTCGACACCAGATGGAGCTCCTGGCCACGTATTTGATACTCCAGGGTGGCCATTATGTAGTTCCATAGATATCCATCACCGTCCTGGGTGAGGGACAGCTACTCAGGACCCCCAGAGAATCATCCTGTCTTCGACACTGAGTTTATCTTCTTTGTCAGATAGGGTTTTATTTCCTCAGAGTCTACCTTTCAGGATCATGCGTTCTCTATGTTTCTATA…
TRINITY_DN98_c0_g2	ATCAGGTTAAAGTCCAATAGGTTTATTGTGCTTACCCCAGTCCAACGCTGGCATCTCCACATCAAGATAAATAACTCCAGCACGAAAGGAGGGTAGGGAGAGAGAGAGAAAGGGGTGGTGGAGAATGAGTGGTGCGTACCCTGGCTGAATGATCTGAGGGTCTTGTTCCCTAGAACAAGTAGTGTAGTGAAGAGAGGAAAGGAAAAGCAGAAGAGATTAAAGTGCTGATTGCACTCTAGATTTAGGTTTGTGATAATACTGTGCCTTTAAGAAATGGATGTCATGTTTTTGTGTGGGATCTGTTTCAGCAATTATTTTAAATTAGAACTGTTTTGCCAGTATCCAGCTGCCCTTTTGTTACTGCAGCAGCATAATTGTTCCTAATTGCTAGAATGTTTG…
TRINITY_DN98_c1_g1	TACTTACTGTGTTTACCCCAGTCCAATGCCGGCATCTCCACATCATGACTACTATCCTCCCCTTTGACCAGGGATCGCAAATCCAATTGCTGACCCCACTCCCTCGTGCCATCCCTCACTCAGCATGCCTCCAACTTTTGCCATTCTAATCCTTTGCCATCCACTCTGTCATGCCATCTCATGCCTTGCCATCGATCCCTCACCATACAGAGCTCCCTCTTCACCATTGCCCTCTGCTTCCTTACCCTCCAGCCTGTACACCACTTATCACTGTTATTGTTGTTGCTTTGTAAACTGACTTTCCAAAATAGTATTTAGTTGATGTTCATTGAACTTGATTTTTTTTGTAAAGATTTCACTGTAGCAATCAGAATAAATGCAAGTCATTAAAATTTCACA…
TRINITY_DN98_c4_g1	GTTTAAGAGCATATTAAAAGACCCATGGCACTACTTCAACAGGTAAGAGGTCTCACAACACCAGGTTAAAGTCCAACAGGCTTTGCCTCGAAAGCTAGTGACGTTTGCTACCAAATAAGCCTGTTGGACTTTGACCTGGTGGTGTGAGACTTCTTATTGTGTTTACCCCAGTCCAACGCTGGCATCCCCACATCACTACTTCAACAAGACCTGACAGCCTTCCTGCTCAACATTGCTCCCTGAAGCAACATGACTAGAAAACATATTGACATTGCTGATTATGGGATCTTTCTTTGTGAACAGTATTTGCAAGCATGAATAGTCAATGCACATCAGAGTCACTTGTGTGTCATGCTTTGAGTACATATGAGAGATGTGATAAGGTGCCATATAATGGAA…
TRINITY_DN98_c5_g1	GTACCTGTCCTGAGAGTGTTTGATGGGGGACAGTGTAGAGGGAGCTTTACTCTGTATCTAACCCCGTTTTATACCTGTCAGCTAATGAAGGAGCAGTGCTCCGAAAGCTCGTGATATAAAAAAAAACCTGTTAGATTTTAACCTGATTTTGTGAGACTTCTTACTTTGCTCTGAGTGTGTGTGAAGGGGGACAATATAGAGGGAGTTTTACTCTATCTAACCCCGTGCTGTACCTGTCCTGGGAGTGTTTGATGGGGGGACAGTGTAGAGTGAGCTTTACTCTGTATCTAACCCCATGCTGTCCCTGTCCTGGGTGTTTTTGATGGGGGACAGTGTAGAGGGAGCTTTACTCTGTATCTAACCCCGTTTTATACCTGTCAGCTAATGAAGGAGCAGTGC…
TRINITY_DN98_c7_g1	GAAGCTTTCAACAGCTTTGAAAGCTCATGATACCAAATAAACCTGTTGCACTATAACCTGGTGTTGAGAGAAGTTTACTGTTGTCAACTTTAAGCACTGGCAGTCTATTCAACACTTCTTCCTTTTTAATTTTGAACACTTTTAGGTATAGAGTTTCCCTATCTGTCTCTATGGCCTAGGTGGCATTTACCTCCTTGGAAAAGACAGATACAAAGTATTAATTTAATACCTTAGCCACGTCCCCAGCCTTCATGTGTAAATTCCTTTTTTGGTCCCTACTCCACTTTTTGCCATCCTTTTCTAAGAGTCGGCCTACTAGCTTAGCTTCCTGCTCCAATAATCAACATCTATTCAGACCCTAATCAAGCAGCTCCTGAAAAACTAGGCCACTTAACTTGA…
TRINITY_DN98_c8_g1	ACAGGATAGACAGATTCCAGTCTTCCCAGAACCCAGCTCAGACTAGTAACTACAGGATAGACAGATTCCAGAATTCCCTGAACCCAGCTTAGATATGTACATTATGTCAGTGAGTACGCTTTGAAAGTACTTCATTGTCTGTAAAGAGCTTTGAGACGTCCGGTGGCTGTGGCAAGTGCTGTGTAAATGCAATTTCTTTCAGATCAGTATAAACACAGTATGAGTTAGGAAAGAGGTCAAGGGTTAACACACAGTGGCTATCCTAATGAATTTTGTCCTCTGTAGAAGGGAAGTGTCCTTGATGGAGAAGGTGGAGGTGGGTGTCTATTCCTTGCAATTGTCACATTTTTCCTTTACAGCTGTTGCAATGTAAATACTTTGCTGTTTTGTTTGCAAATC…
TRINITY_DN98_c9_g1	GGAATTTGAAACAAGCAGGATATGCTAGACAATCTCAGCATGTCTGACAGCATCTGTGGAGAGAGAATAGAACCAACATTTTCTGACTGTCTCAGCCATACATGCCAGGTGACCTATTGGTTATATTAGCTAGACTGTACCTTCCCTTACATTATAAATACATTTTTTTTGAGCATTGAGAACTTTGTACCATAGTCCCCTAAAACACACTACTGCAATTAATAACTGGTCATTTTCCAATCGATAACCACATTGAAAGAATTTGAAGTTTTTCTTACGCCCAGGGGATTACTGAAACCCTCTTTTTTTTTCTCGATCCTTTTAAAATTGCTCCTATTAACGTTTTCAATATGAAGCTTTCTCTCGATTTATTGCCTAGGATAATGTTCCAAGTTCACA…
TRINITY_DN98_c15_g1	GGGGGAGCAGTGGATGGTGGCTACAACACATGGGATGCTCATCACTGAATGAATTCTCAGTGAAGCTTCTTTGGTTAACCCGGTTTGAAGTCAGACGTGTTGGGATTGTCCCATTGGGCGGGCGGAGGTCCCTGGTGAGCTGGCGGGGTTGTGTGCTGGAAAGGATTACTCCAACGGTACTGCGAATACCCTTTGTCTTGTGCAGCACCAAGTCCTCAAACACAATGAACAGGCCATCTAACTTTGAATGACAATCCCAATAGTCTTTGTTGCGCTTTACCTGGCTGTGTCCCACGCCCTGACTGCGAGGCAAGTACCCCCACCAGCTGCCATCCATCACTTGTCCTCCCACATACTTCTGTCGGCTTTTCAGAGACTGTGGCTGTCGCTGTCTAGTCC…
TRINITY_DN46_c0_g3	ACACTAAGGGCAATTTAGCATGGTCAATCAATCCAACTTCAAGTTATTTTCATATTGAAATGTAACTTGGGAAAGATCTCCATTTTGGTCAGGCAAGTAATTGTGCAAAATATTACAAATAAATTGGAAGTGAATTTGAGAGTATGCTTCATTTCAGATGTTAAGTTCCATTTGTAGTCATACTTGGTTATGGCACTTAATGGACATCAGTTGTTATGATTCTTCCAAGGACTTGATCATTGAGATATTGACTATTCAGCTTGTGAAATAGCATTTTAGCAAAGCAATTAGATCAATAAATTGACACACTGGCTGTCACCATGCA
TRINITY_DN46_c1_g2	GGAGGAAACCGGAGCACCTGGAGGAAACCCACGCAGACACAGGGAGAATGTGCAAACTCCACACACACTGACCCAAGGCCAGAACTGAATCCAGATTTCTGATGCCATGAGGTAGCAGTGCTAACCACTGTGCTGCCTGTTCATGATTTACTGATTTTTTTTTTTTGACTCCTGACTAGTGGGACTTTACAGTAGGGGAACACTCTCAGAAGGTTGGCTTCATCTAGGCATTTACTGTAGGGACTAATGCAGTGACAAATGTTCTTTTACTTTTTAAAGCTGAGTATTTTCTCATCGGTGGTGGTAGGACGTTATTAACATCTAAACGTGGTTCTCCATTTGGGGTATTTACATCGCTTGATGTGTTAATCACTTGTGCACATGGACACTTCTGTATTT…
TRINITY_DN46_c2_g1	CCTGTGTAGAATTGCTGTTGGCGCAAATTTGATGGGCCAAATGGCCTCCTTCTGTACTGCAGGGATTCTGTGACACACAGACACTGACACACCATTTTAACACATACATAGATGTACAGAAGGTCAATTGTTTAATAACCAAAGTATGATGAGATAATCAGATCAATATATCTGCTCCAATTAAAAACCTTCGGCCTTTTTTTTTTAAATCCAGATTAATCGTGATCAGTCC
TRINITY_DN46_c4_g1	AACAAAAGAGAAAATGCTGCTAAATCCCAGCAGGTCTGACAGCATCTGTGGAGAGAGAATCGAGCCAACATTTCAGCGGAATTTTCCCCTGCCTACCTGCCATGGGAATCATAGTGGACGGGACACAATACATGGCAAAGGGCAGTTGGCTTCAGGCAGGATTTTCCAGCCACACTCGCCGCCCCACCGCTTCCCCCCCACCAACACACACACACACACAGCCTGAAAGTCCCGCCCAGGGTCAACAAACCTTTGCATGGTCCGAGTCTCGCCCACCACGATTCCTGTGGAGGGGGAGATGGGAATATTCCGCTGCCCTGTTTCCCCGGCCACACCTGCCTCAAAACTGGAAGATCCCACCCTTCGAGTCTGGATAATCCTTCATCAGACTCCGACTCG…
TRINITY_DN46_c6_g1	TCCCACAGTCCAAAGATGTAGGTTGATTGGCAGTGCTAAATTGCCCCTTAGTGCCAAAGAGATTAGCTAGGGTTGCGGGAAGAGAACCTGGATGGGATTGTAGCCGATGCAGACTCGATGGGCTGAAAGGCTGTAGGATTCTGTGGAGGGTTATTAAACGAGTGAACAGCTGTGTCCTATCATACACAGAAACTTGCAGAGGAAGATGAGCAAGGGGAATGAAATTTAACATGGACTGTACGTGACTTTGTGTGGAAAAGCACAAAATCCAAGACACATACAGTGCCAGGAGAGACTGGTTAAAGTTTCAAGCCAAGCTTCCTGATCACCACATCAAACAGAGAAACCTTCCCAAAGACAGCTGGTCACACGTTCCTGTGTCTTCTATTACAGATTCAG…
TRINITY_DN67_c0_g1	AATCCTGCTTTCTCCCCATAACCTTTGATCCTGTTCGCCCCAAGTGCTATATCCAGCCACCTCTTGAATACATCCATCAACTAAAGGATTTGCTGAAGTATTTGTACAATCCTTGGAACATTCTTTAAAAGCTTCAAAAGAGTAAGGTTTGTTATCACTTTGTGTGAATAGCTTTTTGGCATCTTATAGAAACACTACTCATATGATTACCCAAAGTTCACCTGCACTATTACTCTTAAAGAGAAAGTTGAGAACTACATTTGATTTATTACCTCCAGAAACTTCAGAGGTAGAGCGTCGACAACAATCTCAAGTTACTAGAGGAGAAGTGAGGGCAAAACAATTCAACCAGGAGATCGAGTGTACGTGTATAATTATGCTACGAGTGAGAAATGAGTA…
TRINITY_DN67_c0_g4	TCCAACTCAATAGCCTAATCCTGCTTTTTCCCCATAACCTTTGATCCCATTTGCCCCAAGTGCAATATCCAGCTGCCTCTTGAATACATTCAAAGTTTTGGCATCAATTCCTCCCTGAGTTCCACAGGCTCACCACTGATTGTGTCAGGTTTTGTGAAATTTAATTGGTAACCTAGCCTGTGCTTTAAGGCCTTGGCACCTTTTGGTTAGTAATCTAAGTAGGCCGCTTATTTGAGATGAAAGGTTGTGCCTGGAGGTTTTCACAGCTGTTACCTCCTGCCACGTGTTGAAGGTTATTTCAAGAGGGAAAAAAAAGACATGACGAAATGATGCCTTCTTTCATTTTGTGCATGGTATTTAGTTATGATTTACAATTTTATGGAAGGACATCGCAGTCCT…
TRINITY_DN67_c1_g1	CTAACTCCTCAAAATCATACAACATTTTGGCCTCAACTACTTTCTGTGATAGTGAATTCCACACATTCCCCATCTTCTGGGTGAAGAAATTTCTCCTCACCTCAGTTCTAAAAGGTTTACCCCTTATCCTCAAACTATGACCCCCTAGCTCTGGACTCCCCCCACCATCGGGAACATTCTTTCTGAATCTACCCTGTCTAACCCTGTTAGAATTTT
TRINITY_DN67_c1_g2	GCCAAATGGATGAAGAGATTTCTCCTCACTTCAGATCTAAAAGGTTTACCCCTTATCCTCAAACAATGACCCCTAGCTCTGGACTCCCTCACCATTGGGAACATTTTTTCTGAATCTACCCTGTCTAATTTTAGCCTGTTAGAATTGTTCTATGAGATCCCCTCTCACGCTTCTAAACGCCAGTGAATATAATCCTAACCAACTTAACCTCTCCTCATATGACAGACCTATCATCCCAGCCTGGCAATCCTTCGCTGTGCACCCTTTATAGCGAGGATATCCTTCCTCAGGTAAGGATACCAAACTACACACAATACTCCTCTGGCTTCACCAGTGTCCTATACAATTGCAGCAAAACATCCCTACTCCTATCCTCTGGTTATGAAGGCCAACATACCA…
TRINITY_DN67_c1_g4	TCTAACCCTGTTAGAATTTTATAAGTTTCTATGAGACCCACCTCTCTTTTTTTTGCCTCAGCTTGAACTTTGCGCTGCCAATGCCCCATTCCCTGACAGAGTGGGCGGTTCAGGCCTGTACCAAGTCTGGGTTGCCACCTGCCCCATTTTGGACTGGACTGTCCCGTTTTGCCCGGATGTTGCTCAAACCTAAGCCAGGTGCCACCGATCCGTGATTCTTTCTGAACCAGTGGCCATTTTGGACTCATCGACTTTGGCCGCCGGTTAAAGCTTAATGGTTGTTTTCAGTGAAACGGTGCCCTGGTTGCCAGAACCATTTTCTTTTCAGATTAAAGATATTTTTAATGAGTTGTGAAAGGGCACCTCTGTATTGAAGAACTCTCTCTCTTACTGAACCTG…
TRINITY_DN67_c2_g1	CCCTGATGGCTTTCCTCCAGGTGCTCCGGTTTCCTCCCATGCTCCAAAGATGTTGGGTTAGGTTGATTGGCCGTGCCACATTGACCCTAGTGGTAGCGGGATTAGCAGGGTAAATAAGGGTTAAAAGAATAGCATCTAGGTGGGGTTGTGGTCAGTACAGACTCGATGGGCCGAATAGCCTCCTTCTGTACTGTAGGGACTGTGTGATTATTTTCCTTGATGTTTCATTTTCACAGGTTGCTTTACCCCACTGCCATGCTGCCATCACTTTTATCTTGTCCCTGGTCACCAGTGTCAAAGCTACAGTCAGCTTGTCAACGCTACTGGGAGACAAACATACCCCCAGGTGATTTGTACATACGAAGTAACAAAGAGTCATAGAGATATACGGCACAGAAA…
TRINITY_DN67_c2_g2	AGAAGTTGCCCCTCAGACCCCTTTTAAATCTTTCCCCTCTCACCTTTAAACTTACGCCCTCTAGTTTTGGACTCCCCCTACCCTGGGGGGGGTAGAGACCTTGGGTGACAGTTGCACTTGCCCCAAAACCGTAAAATCCCACCCCCAGCTCAACGGACCTTTGCACGGTTTGGTCTCCTACCCTCTGAGCCGCTGTGGCAGCTGGGGCAGCCCTTGGCTGTGCACCTTATCTGTGTAGCTGCACAAGTGGAGCTCCAGCAGTCTGACTGAATGGCCTGCTTCTGTGCGATGAATACTGTGTAGCCCTGTCCCCTGCACTGAAAACCTTGTAAAGACAGGCATTCAAAATGTGGCAGGATGAATCCTGACTAATATTTAGCCATTATTTCGGAATGCTGT…
TRINITY_DN67_c3_g1	TAAACTCCTGTGAATATAATCCTAACCGACTTAGTCTACACAATGTTTTGGTCTCAACTGCTTCCTGTGGTAGTGAATTCCACAGACTATCCATTTTCTGGATGCAGAAATTTCTCCCCATCTCAGTCCTAAAACATTTACCCCGTATCCTTAGACTGTAATGCCTGGTTCTGGACGCCCCCACAATGGGGAACGTCCTTCCTGCATCTACCCTAACAAGTCCTGTTAGAATTTTATAGATTTCTATGATATCCCATCTCATTCTTCTAAACTCCGGTGAATATAATCCTAACCAACTTAGTCTGTCCTCATACGACAGACCTGCCATCCCAGAAACCAATCTCATAAACCTTCGCTGCACTCCCTCGATCGCAAGGATATCCTTCCTCAAATAAGGAC…
TRINITY_DN67_c4_g1	GGCAATTTATCATGGCCAATCCACCTAACCTGCTCATCTTTGGACTGTGGGAGGAAACTAGAGCACCTGGAGGAAACCCACTCCGACATGGGGAGAACATGCAGAGTCTGCACAGACAGTCATCCATAGCCGGAATCCTGGCTCCCTGATGCTGTGAGGCAGCAATATTAACCATTGTGCCACAATGCTGCCCACCTAATAGTCCAAGATCAATATTTTAAAATAAATTAAAACATAATTGATATTTCATTTAAAATGATGTAATAAGTAAACAGTGTGATTAAAATCTTCCACATGGCCATTAT
TRINITY_DN67_c5_g1	AACCAGAGCACCTGGAGAAAACCCACGCAGACATGGGGAGAATGTGCAGACTCCACACAGGCAGTGACCCAAGTCTGGAATTGAATCCGGGTCCCTGGTGCTGTGAGGCAGCTGTGCTAACCATTGTGCCGCCCTTGGAGCATTCCACCTGTAATTTTGAACTGTTCAGGGAAAGTTAATCCCGCCTATCCACAAATTTGAAATTTTCCCACGTAACTCTTAACCTCATTCACAATTGAATTCCTACAGTGAATTCAAAATTGAAAATCAATTTTGCTGATGTGTGGTCTCAAATGATTCTATAATTTACCGAATGGAATAATCAGGGATTACCATTTTCAGCTCCCCCAGTGCATTCTGATCAAGATGATTTTAACTTGACATTTTGAAGGAATTCCA…
TRINITY_DN67_c6_g1	GGATGACCCTTTGTCAGAGCTGGATCCAGGCTCGAAACGTTGGCTCTATTCTCTCCCCCGCGGATGCTGTCAGACCTGCTGAGATTTTCCAGCATTCCCTGCCCTTTATTTCAGATTCCAGCGTCTGCAGTATTTTGCAGACATCAGCAACTGTCTGGGATATTGATGTACATATATGTATATATAAAAGAAATCTTCTGAATGGAATTAAGTGCATTATCATGTTATGTTCTGATCGGCCTTGAAGCGTGAAGTCTATATTTGTATTGCCTTTTTTTTTTCAAACACACAATCCAGCCTGCAGTTGGTGAATGTTGGAAGGATGTTCGACCCCTGAGGGGTGGCACAGCTGAGTCCAGTATCCCCACAAATGTGCACTCGTTCCACAATGGTCTGGAA…
TRINITY_DN67_c7_g1	GTTAGAATTTTCTCTGAGATTCCCCCTCATTCATCTTAACTCCAGTGAAAACAATCCTAACCTAGTCAATCTCTCCTCGTATTATGAGTCCCGCCATCCCCGGAATCAGTCTGGTAAATCTTTGCTGCACTCCCTCAAGATCAAGAGCACCCTTCCTCGGAAAAGGAGACCAAATCTGCACGCAATACTCAAGGTGTGGCCTGACTAGGACAAATAAGGAGCTCTTTATTGACTCTCACTATGCAGAGCTGGATGTCTGTGTTCAGCATTGAATATGGGAATTTTGCATGCAGTATTACTCATTATTAACTGATTATTACTGAACACAGAAAAACCTATTGAGAGGAAGTACAAGGCCAAACTGAAAATGGAAATGCTATTTCTCGTTCTCTTCCAGAC…
TRINITY_DN67_c9_g1	AGTGTACCCGAACAGGTGCCGGAGTTTGATGGCTAGGGGATTTTCACAGTAACTTCATTGCTGTGTTAACGTAAGCCTACTTGTGACATTAATAGATAAACTAAAAAAAACTTGAGAGAAGAAGGGACCACAAATCAAAACTTCCTGATCTCCAGTATCACCCCTTGAATGAAAGAGATTTGGCAGCTAATGGCCCTGAGCAATCCTTCTTTGCTTTACACTTTATGTGAGGTGTGATTACATGGTGGGGGGCTGGGGGAGGGCAGGGGGTCTAGTTTTACCGTACTGAGGGTAATGTTCATCTTAAATTCCTTTCTGACTTGAATGCAGCCTCCTAACTGGCAGAGAAACAAGTGGCGAGGAGGGTGTTAAGGTTAGCATCTCCGAACCTATGTGTGG…
TRINITY_DN67_c11_g1	ATCACTGCTGTTTGGTACCCCCCCGCCAGGCTGGTGGCACGGTGGTTAGCACTGCTGCCTCACGGGGAGGAGCCGGGTTCGATTCTCGGCCTGGGTCGCTGTCTGTGCCGAATCTGCAGATTCTCCCCGCGTCTGTGTGGGTTTCCTCCGGGTCCTCTAGCTTCTTCCCACATGCTGGTTAGATGCACTGGCCGTGCTAAATTCTCCCTCGGGTGTACCCGAACAGGCACCGGAGGTGATTTTCACAATTATTTCAGTTAACGTAAGCCGACA
TRINITY_DN67_c15_g1	GGGCCTGGGTGGGATTGTGGTCGGTGCAGACTTGATGGGCCAAATGGCCTCCTTCTCCACTATAGGATGCTCTGATTCTGTGAACAGGGAATCCGTTTGAACTCAGAGTAAAAGCGCAACATCACACAACTGAAGCTAAGTCTGTGAAGACAGCCAAAATGTTGCATTGTTCGTTGCCTCCTTAGATTCTGCTGACTGTTTTAAAAACGAGATGTCATGGGCACCTGCAGAGCTCGTACTATTGTAAATGACGTCGCTGTTTTCCCTGCAGGAATTTACAGCAGACACTTTTAAATGCAGGTGTATTAAAAGGCACATTGGTCAACGCAGTAACAAGGCAAATGTATTATGAAGTGCACATTAAAAAGCACCACTGTTACCTATGCCCACTCTAGAACT…
TRINITY_DN67_c16_g1	GTCCGTGTGGAGTTTGTTCTCCCTGAGTTTCCTCTGGGTGCTCCGGTTTCCTCCCAGTCTGAAAGATGTGCGGGTTTGAGGGATTGGCTGTGCTAAATTGCCCCTCAGAATCCAAGGATGTGTAGGTTACAGGGATTGGTCATGCTAAATTGCTCCTGTTAAGTGAACTGGCTCTACTAAATTGCCCCTTAGCGTTGGTGGGACTAGCTAGGGAAATGCATAGGATTTTAGGGATAGGGCCTGATGGGATTGTGTGATTGGTGCAGACTCTGATGGGCCAAATGGCCTCCTTCTGCACTGTGGGAATTCTATGATGATCCTAATCTAGTTTCTTCTTAAATGTATCT
TRINITY_DN67_c19_g1	GCATCTGGAGGAAGCCCACACAAACACAGGGAGAACATGCAAACTCCAGACAGATAGTGACCCAAGCCAGGAATTGAACCTGGGTCCCTGGAGCTGTGAGGCACCACTATGCCACTAAGTGGCTCCAAAATCAATTTAATATATGATCTCCAGATTAGGGACGTATCAGATATTAAACTAATAACAGATTATTTTTTGTACTTTTTTGTTACTTTATTTCCAATCGAAAATCCAATTTGGCCCAATCAGAGTCCCCACAAGAGAGACAAAACAGATCCAGCTGACAAGACAGGACATACAGCATCTTGGGCTCGACCAAACAAGATCCAAGCTGACAGGATAAAGGATTACACTCCCTTCTGAGCTTGATCTGAGCTTCATTTTAGCCAAAAGGCTAAT…
TRINITY_DN67_c20_g1	ACTCGTTATAGTTTAGAAGAATGAGGGCAGATCTCATTGAGACGTATAAGATGATGAATGGGATGGATAGGATAGAGGTGGAGAGGTTCTTCCCACTCAGAAAGGACAGTAGGACTAGAGGACTAGTAGGATAGAGGTGGAGAGACTCTTCCCGCTCAGAAAGGACAGTAGGACTAGAGGACTAGTAGGATAGAGGTGGAGAGACTCTTCCCGCTCAGAAAGGACAGTAGGACTAGAGGGCACAGCCTCAAGATAAGGGGGGGGACAGTTTAGAACAGAGTTGAGGAGGAACTTCTTCACTCAAAGGGTGGTAAATCTCTGGAATTCTCTGTCCGTTGAAGTGGTGGAGGCTGC
TRINITY_DN67_c22_g1	GATTCTCCTACCCTCCTTTATCAACTTCTTTGTCAATCTTTGTTGACATTTAAACCTCTCCCAATCCTCTTCTCGCCCACTCCTCTTCGCTACTCTAAATGCCTCCGCTTTTAATTTAAGTAGATTTTGAATTAGTCCTCAAGGAAGTACTCACGACAATGGTAATGATGATATTGAGTATGATTATTTTATATAGAATACAACACAGAAAATGGGCATTTTGACCCATCTATACTGTATCTCAGACACAGCTTTCCACCCACGCCCATCCCTGCTATCCTATGTAATTACCCCACAAATCTCCCTAACCTACATATCTTTGGACACTAAGGTGCCAGTTAGCATGGCCAGCCCATCTAACACTTTCCTCTCCCAATCCTCTTCTCGCCCACTCCTCTT…
TRINITY_DN67_c29_g1	TTTTAAAGTTAAAGTTTGCATATTAATGGCACAATTAGGCTTACATTAACACTGCAATTAAGTTACCGTCCCCTATTTCAATTCAACATTAACCCCTTGAATGGAAGCACATTGGAATGTCTTGAGTTTGTGATGGGGTGCTGTGTAAATATAGATTTTTTTCTCAGCGATGTATTAGGCATGGAGGAGTTCACGCTATATCCTTCTGAGGCTTCTGGGAGATGGAGATAAAGACTCTCACTTCTTGCTGAAGGCCAGCTTTCAGACAGGCTTTGTGCATTTACCCATCTATGGAAAGAAGTAGTTTCTTTCTGCCTTCAGCATTTGAACCTTTAAAGCCTTCAGCAATCCCTCCTCTTACCCTAGAAATCTGTTCCCTTATCCATGCTAACATTTTAT…
TRINITY_DN67_c43_g1	GCAGGAGGAGGCCATTTGGCCCTTCGAGCCTGCTCCGCCATTCATTACGATCACAGCAGATCATCCAACTCAATAGCCCAATCCTACTTTCTTCCCATAACCTTTGATCCCGTTAACTCCCAAGTGCTATATTCAGCTGCCTCTTGAATACATTCAATGTTTTTCAACTACTTTCAATGATAATGAATTCCACAGGCAACAAATAACAAATAAGGGAAAACAAGCCTGCCAAAAAAAAGCACAGCTTTTGTGGCTGAGAGCCAAATTAGTCATGAGAATATTATTCATTCATGTGAGAACATCAAAATGATTGTGCTGTGCTTTTGTTTTAAATGATCTCAGTGCTCCGAACTGAGACAGTGATCAGAGAGTACTGAATACACAAGGTGGATACTTTCT…
TRINITY_DN1_c0_g2	TTGTGAGAATATTATCAAATAAATCGGTTGGACTAAAACCTGGTGTTGTCAGACTTTTTACTTCAAGTAAGTACAGGAGGTGGGAAATGTCTTTATTTTGATCTGTTGTGGTGTTTAGATTTTAGAAAAAATGGCTTGTGAAAAGGCTACGATAACTGAGATATTCATTCTGGATTTGAAATTGAGGAGAAAAGAAGTTGTGTTGCAAGATTTTTCTCTGGACTTAATAAGGGAAATAACTAAGGTTATACAATCTCATTCGCCCCACTCCTGTTGCCAGTGAGAATGGAGAATTTGGTTCTTATCTTGTCCGTCCTGTGTCCACTGCCAGAGAATGGAAAATTTGGCACTCAGCCAAAACTCCATTCACTGCAGCAGCACTGGAGAATCCCAGTCGTG…
TRINITY_DN1_c0_g3	GGGGGATGTTAATTCACTGGGCAGGATTTTTTCACACTGCCTGCCGTGTGTTTCGAGGCAGTGCCATTGGCCATTGGGGGGGTCTTTTGGTCCTGTCGTCAATACGGTTTTTGGTGAATGCATCTCTCACCACCTGGAAATCTGTGGTAAGGGTTTGCCATTGGGCGGGACAGGAAGATGCTGCCGACATGAATGGCTGGAGAATTCCAGCCACTATTCCTGGCCAGATGATTTGCCAATTGTGACTAAGATTGATAGATTTACATTAACTATTTGTGGCAGAAACATATCCACAAATTCCTGTTCACTGAGAGCTTCGACTGAATGGTATAGTTAAACAATAGACATTATCTGTTGTATTACTGGGCAGGATTCTCCAATCGCATCTGTGCCCAATCC…
TRINITY_DN1_c1_g1	TTGGAGTTTTGTAGGCGGTGGCTGGTTGGGTATGGTCTATAGTCACTGCTTGTGGAGCTCCGGGCGCAGTGTTCAACATTGGGTGTGGTTCTGTGGTTGGACAGCAGTTGCTGGGCAAGGATTTGTCCTGAGGAATGAACCAGCGAATGGTTGTTGCTTATTTTGTTTAGTTGAAACAGGTGCATTGTGTGTCTTCCTGTGTGCAAAGAAAAGGGCCCTTTGTGTTAACACATTCCAGTCATCTTCACCTGTTGCTGTAATGTTCTTATCAGCAACCTTGTAAATAGGACCTGAGTCATTTTCTCATCACGTAAGCTTGATGGTGAAATTGGCACATCAAAAGCACACTACAGAATAATAGCTACCCTGATCAGATCATTTTGTGCTATCTATTGCGCA…
TRINITY_DN1_c1_g2	TAGAAACCGGAGTACCAGGAAACCGCGCAGACATGCAGACTCCGCACAAACAGTGACCCAAGCTGGGAATTGAATCCGGGTCCCTAGTGTTGTGAGGCAACAGTGCCAACTACTGTGCCACCCTTTATGTTGTTGGGCTTGCAATGTGGCACATTTGTGTGTACTGGAAGCTACATATATTGATAAACAGGGCGCTCACACAAAGAACATATACATACTTGTTTCAGCTGAACAAAATAAGTGACAACCATACACTGGTTCATTTGTCAGGGCAGCGCCCTGGTCAATGAGAGACAAGCTACCTGGTTTAAATATTCAAACAATGCTTGGCAGTTAACTGTCAGTCATAATTAAATGATGCATTCTCCATGACAACATCACCAACCCTCTTTATAAATT…
TRINITY_DN1_c2_g2	TAAAAGGTTTATCCCTTATCCTCAAATGGTGATCTCTAGTTCTGACTGCCCCACCATTGGGAACATTCTTTCTGTATCTACCATGTCTAATCTGAATAAGTTTCTAGGAAACTCCCTCTCGCTCTTCTAAAGTCCAATGAATACAATCCTAACCAACTTAATCTCTCCTCATATGATAGACCTGCCATCCCAGGAGTCAGCCTGATAAACCTCTGCTGTACTCCATCTATAGCAGGGACTCCTTCCTCAGATAGGGTACACTACAACTGCATACAATACTCCAGTGTCACAAAGACACTGTACAATTGCAGTAAAACATCCCTATTCCTATATTCAAATCCCCTCACTGTGAAGGCCAACATACCATTTGCCTTCTTTACTGCCTGCTATACCTGCATG…
TRINITY_DN1_c4_g1	CTCAGAATTGTTTGAGATCCGACCCATTACAGTGGTGTCATCAGCAAACTTGAAAATCGAACTGAAGGAGGATTTGGCCGCACGGTCAAAAAAATGGTGCGATAGGATTTGAACTCATGTCTCTAGCTCACTGATCAAGGCCTCCAATCCAGTAATGTATCCACCATTAAAGCCTTCACTCTCTGCATGTTTTTGCGCCACTTAGCATCAGGTTATAAGTCAAAGGAGAGGACTGATTGTCCTTTCATTCTGGGAAGGAGGATCCATATGGGAAAACTTGCATTTAGATGTGTTGCTTAGCTTTCCATTGACCACAAGACCATGGGGGTGGAATTAGGCCATTTGACCCTTCGGGTCTCCTCCGCCATTCAATCATAGCTGATAGGTTTCTCAACCCCA…
TRINITY_DN1_c5_g1	GTACAAAAACAATTTTTTTCACTGTATACCAGTACATGTGACAATAATAAATCAAATCAAATCAAAGTTGGGGGGACAGGTAGGATCTGCTGCAGCTGCAGGTATAATTCCAAACTTGGTAAGTTGTCTCCTTGATGCCTGATATTCAAGGATGTCACCAAGTGACTGCTGAATATCCTGAAAAAAAGGGTGAACAGCCAGGTCAAAGTTCAATTCAGTACCAATGGCATAGGTGAAAAGAACAATGAGGTCTGGCAGGCAAATTTTGTGTAGAATGTAACCAATGATAACATTGGATCTGTTGTAGTGTGACCAATTGTAACATGCTGTATGCAACCAATGACAAAATGATGTGGTGGTCAGCTGACCAGCTGAATCAGTATAAATAAGAAACTGCTG…
TRINITY_DN1_c6_g1	TTAGCCTCAGCTACTTTGTGGTACTGAATTCCTCCTCTCCTCACCCCCCATATCCCTTGATCCCTTTAGCCCCAAGAGCTATATCTAATTTCTTCTTGAAATCACACAACATTTTAGCCTCAGCTACTTTGTGGTAGTGAATTCCACACATTCACCACCCTCTGAGTGAAGAAATTTCTCCTCACCTCAGTCCTAAAAGGTTTACTCTTTATCTTCAAAC
TRINITY_DN1_c7_g1	CTTTGGACTGTGGGAGGAAACCGGAGCACTCGGAGGAAACCCACGCCGACACAGGGAGAACATGCAAAGTCCACACAGAGACAGTGGCCCGATGTTGGAATTGAACCTGGGTCCTTGGTGCTGTGAAGCAGCAGTGCTATCACTGTGTTACCATGCCCCGTTAAACTAATGTATATGTGCAAGACAAGAGTCTGACAGAACTCACCCAAATGTGAGAGGGGGAAATGAGAGGATGAGTTATTGTGAGTTGCTGTTGATGCACCTTGTCGTAAACGAGGATTGGCAAGTGTATGTGAACATGTCACATGTCTTATGTTCTTAGATCTTGATAGTTCTGCTTAATTTTATGATTAATGATTATGAATCTATGATTCTAATTTTAGGGTTGGTTATGGGTCT…
TRINITY_DN1_c14_g1	TTTGGACATTATCATCGTCAACCTACCTAGTCTACATGTCTTTGGACTGTGGAAGGAAACCCATGCAGACAATGGGAGGAAGGTGCAAACTCACACAAACAGTCACCCAAACACCAGAATCAAATCTGGGTCCCTGGTGCATGAGACAGCAGTGCTAAACACCAGCCTGCTGCCCTTCCAAGATCTAAGATTCTGTCAACACACTGCTGCAATTTTAAGTCTATTCATTGGAATTAATGATAAGGGAAGGACCTCATGGAAAACTGGCATTGCATGAATGTCAATGTTTTGAGTGTTATTTTAAGTTCATGGGTGGAGTTGAAATAAGATAATCCAGATCTTTTCCCAGATGCTGAGTATTTTCTGTTATTTTAAAGATTTGATTTATTATTGTCATGT…
TRINITY_DN1_c15_g1	GGAAAAAGGGCCTGCATGGGATTGTGGTCGGTGCAGATTTGATGGGCTGAGTGGCCTCCTTCTGCACTGTAGGGATTCTATAAAGTATTCTAAAGAACTTCTAAGACAGCAGCTCTGGATAGCAAGGGGTTGGAATAGGATTTTGTTTAACCTTGAGACAAGAATATTAAAAATTACAGTTTAACATTAAACTGATACAACCCAAGAACTCTGTTAGAAAACTGCAGCTTTGGTCTCCACACTCACTACAGGATGAACAATTGATAAGCTCTTTATAGAGACTACAGAGTGATTTACGAGAATACTCCCTCAGTAGAGAGACACTTGAAAATTGGGTGTATTTTCATTTGATTTGATTCATTATTGTCACGTGTATCAATACAGAGTGGGAAGTATTGA…
TRINITY_DN1_c22_g1	TTCATAGAGAAGGAAAGGAGAGAGTGCAGAATGTAGTGTTACAATCATAGCAGTGTAGAGAAAGATCAACTTAGTGAGAGGTAGGTTCATTCAAAGGTCTGATGGCAGCAGGGAAGAAGGTGTTCTTGAGTCGATTGGTATGTGACCTCGGACTGTTTTATCTTTTGTATCACTTAGAAATGCAGATACTTACATACACACACTTACATACATAATTATGTATGTATACACAAAAAGATTTCCATATACACACATAGACACAGACACGTACATAACACATGTATATATGCTAACATAAATGCATATACTGACAAAATTAGACAAAATCATTCATGTACACACATATATACATACACAAACCTTTACACATACACACTTACGGACATACAAACATGCAAA…
TRINITY_DN1_c32_g1	CAGTGCAGAGAGAGGCCATCTGGCCCATCGAGTCTACACCGACCACAATCCCACCCAGGCCAAACCCTCATATTCCTACACATTTACCCGCATATCCCTCTAACTGACGCATCTCAGGATACTAAGGGGCAATTTTTTTAGCATGGCCAATCAACCTTACCTATACGTCTTTGGATTGTGGGAGGTAAGTGGAGCACGTAATGGACATTGGGAAGATGTCTTCTGAGAGCCACCACTCTGCCCTTGCTGCCCACCTCCCCTGTCCTTCTCTCCATGACCTTAGTCCATGAAACCCATGAACTGTGACCTGGCTCAATCCTGGGATTCTGTGGGGATGTCCTTCCATAAATAGCCACAGCCTCCCAATGATGCTGCTAAATGCAGGAGCTACAGATTTTC…
TRINITY_DN45_c0_g2	CCCGGGTTCTAATCCCATCACAGCACATGGTGGAATTTGAATTCAATAAAAAATATCTGGAATTAAGAACCTACTGATGAGCATGAAACCATTGTCGATTGTCAGAAAAACCCATCTGGTTCCCCCATGTCCTTTAGGGGGAGGAAATCTGCTGTCCTTACCCGATCTGGTCTACATGTGACTTCACCGCCACAGCAAAGAGATTGACTCTCAACTGCCCTCTAAACAAAGATAGCTTGGGGTGGGCAATAAATGCTGGCCAGCCAGCGACGCCCATGGCCCACAAATGAATAAAAAAAACCATCCA
TRINITY_DN45_c3_g2	ATTGTGGGAAAAACCCACCTGGTTCCATATCGGGAAGGGAAATCTGCCGTCCTTACCTGGTCTGGCCTACATGTGACTCCAGAGCCACAGCAATGTGGTTGACTCTCAGGTGTCCACTGAAATAGCCTAGCAAGCCATTAAGTTCAAGGGCAACTGGGGATGGGTAATGAATGCTGGCCAGCCAGCACCTGGGTGGCACAGTAGCTAGCATTGCTGCCTCTCAGCGCCAGGGACTTGGGTTCGATTCCCGGCTTGGGTCACTGTCTGTGTGGAGTCTGCACGTTCTCTCAGTGTGGGTTTCCTCCGGG
TRINITY_DN45_c5_g1	TTGGACTTTAACCCGGTGTTGTGAGACTTCTTACTGTGCCCACCCCAGTCCAACGCCGGCATCTCCACATCAGTTCTAAAGGGTTGTGCCTTTTATTCCGAGTTTGTGGTTTTCAATCCTAGTCTCTCTCACTAATGGAAACATCTAATGTACAAATAAGACCTTATCTAAATAAAGTGGAAATAGAGCAGTGTTGGCACGCTGCCAGTGAAACGAGCTCTGTTTACATGACCCATAAAGATCCTCTCTTAACGGGTAGGACACCATTACCCGTTCTGGCAGCACCGTGCTGACAAAGGTTTAAGCTGGGGGTGAGGGGAGGGTCTCTGGGAATAGGTACTCAATACACTGGGCACAGAATTCAATGATGTACTTCCTATTTCAAGACTTAAAATATTT…
TRINITY_DN45_c7_g1	GTGGTTAGCATTGCTGCCTCACAGCACCAGAAACCTGGATTCAATTCCCTGCTTGGCTCACTGTCTGTGTGGAGTTTGCACGATCTCCCCGTGTCTGAGGATTTCCTTTTGGCACTGTGGTTTCCTCCCAGAATCTAAAGATGTGTGGGTTAGCCTGATTGGCCATGCTAAATTTGTTCCTTAGTGTTAGGGAGATTAGCTGGGTAAATATATGGGGTTGCAGGGATAGGGCCTAGGTGGGATTGTTGTTAGTGCAGACTCGATGGGCTGACTTGCTGCCTTTTGCAGTTC
TRINITY_DN45_c9_g1	CAGTGAGGATGTCTTTTTTTTTTAATTCATTCCTGGGACATGGGCATCACTGGCTGGCCAGCATTTATTGCCCATCCCTCGTTGCCCTGGTTCAGAGAGCTCTTGAGAGTCAACCACATTGCTGTGGGTCTGGTATCACATGTTGACAAGACTGGGTAAGGACGGCAGATTTCCTTCCCTAAAGGACATTAGTGAACCAGATGGATTTTTCCAACAATCGACAATGGTTTCGTG
TRINITY_DN24_c0_g1	GGGAAATGTTGGCTCTAATCTCTGTCCCCAGATGCTGTCAGACCTGCTGAGACTTTCCAGCATTTTCTGCTTTAGTGCCAGTGAGACACTGGGCTGTTCCCTGGTTTAATGAGACGCTGCCTTACTGGAGCTGGACTAGGAGTGCTGGCCCCAGCTGGAACAGTTTGTGTTTGACCTCCTTTATAGAGTGCATTTGAGGAAGGGCAGATTGCAAAATTAAATCTTTTGATGGGAATGCATTTTGGTGACACTGATGTATATATCGGGCTCAATATCAGCTTATGCTGTTTTTTACTTTGTATTGGTGATTCAACCTGGAAAATAAAAATGATTTTAATGATTGAAAGCTGC
TRINITY_DN24_c2_g3	GATGCTGTCAGACCTGCTGAGATTTTCCAGCATTTTCTGTTTTTGTTGAATACCTTAGCAAAGTGCCTATCTGTCTTGACACTGCTCATAGATAAGAGTACAACAAAGGAAACCTCATTAAGCCTTGAGGAAACTCGGTTCATGCCTCTGAATATCAATGGTATGTCAGGATTCCGGTTTATTTTAAGACAATGTCCATATGTTCAGCTGATCTTTTCCTGCACCCCAACCATGACTGTAACATCACAATCTGCACCTTCTCCTTTCCTTCTCCCCTACGTACTCTATGAATGGTATGCTTTGCGTAGCGCGCAAGAAGCAATACTTTTCACTGTATCCCAAAACATATGGCAATAATAAATCAAGTCAAACATAACAGAGCTTCTGCATTG
TRINITY_DN24_c2_g4	GAGGAAACCCACGCAGACACAAAACGTGCAGACTCCACACAGAAAGTGACCCAAGCCAGGAATGGAACCTGGGTCCATGACTGTATGAGGCAGCAGTGCTGACCACTGTGCCACCGTGATTAGAGGAGATGTGAATGCAAAATGATGAACTGCCTGCTGCCCAAAAGCACAAAAAGGAGAAAAATATGATAGAGTCCAATAAAAAGGGGAAGGTTGTAAAGTTCCCACGCTTATGTTGAGCTTCACTGAAACAGTGCAGGAAGCTGAGGTCATAGATATCAGTGAAGTCAGCTAAAAAGAGTCAAAACATTGGCTCTAATCTCTTTCCACAGATGCTGTCAGACCTGCTGA
TRINITY_DN24_c2_g6	AAATAAAAGCAAATTACAGCGGTGCTGGAATCTGAAACAAAGGCAGAAAATGCTGGAGGGTCTCAGCGGGTCTGACAGCATCTGTGGAGAGAGAATGGACCCTCGAAACGTTGCCTCGGTTCTGGCTTTCCACAGATGCTGTCAGATCTGCTGAGATTTTCCAGCATTCAATGTTTTTGGCCCCCAAGGACATTGTTGCTGCAGCCAGGGAAGCAGAAGCCATGCAGAAGAATTTGTGCAATAGACTGACCATTTGGAAATAAGCTCCTGCATGCGCGTCTTACTAAGGGACTGATGTACACAGATACTGTTGTTAACGGGTTAATAAAGGTTTTCCACGTAAAATGGAAATTGTATCCAAAGTTTGTTTTGTGTCATTGATATTTAATATGGGGTTCA…
TRINITY_DN24_c3_g1	TGCAGACTCCGCACAGTGACTCGAGGCTGGTATTGAACCCGGGTGCCTGGTGTTGTGAGGCAGCAGTATTAACCACTTTGCCTCCATGCTGCCCTATCTTTAATACCTAAAAATTGTATTGTTTAAAGTGACTGAGAAACAGCCCACAGGTACAAATAATTGGGCCAAAAATTAAATCTATCCTCTTTATTCAAATCAACATGTAAAATATTAATGCTAATAGAATGGAATCCAATCCCATTTCCGGACCTAGTCTCAGATCAAGCATTCCCAAGAATAACACAAACATATGTAAAGTAAAGCTTCCATCAAATGAGATAGATGTTCTAAGTCGCAACCTCAGAAAGCACCTTTATTTTCCATCTCCCACACAAGGTCATCTTTGTGACCTTTCTGAAT…
TRINITY_DN24_c5_g1	CCCTGCTGCCGTCGGACTTTTGAATGGACCTACCTTGCATTAAGTTGATCTTTCTCTGCACCCTAGCAATGACTGTATACGACATTTTTAACACTCTCTCCTTACTTATGAACGGTATGGTTTGTCTGTATAGTGCGCAAAAAACAATACTTTTCATTTGTACCAATACAAGTGACAATAAATAAAACCAAAATTGGACTTCTGGGTAGAATACGTCCCAGCTGGGCAAAAGAGGAATTTTAACTGAAAAACAACATTTTTTTAAAATCTTATTTTATTCTTGGAATTATGGGATGCAGAGGAAATTATAATGTCTGGTAGCTGGAATAGTCTGGAAGCTTGCACCAAGCTGCTCTTGGCAGGAGCTATTAAAGTGACTGGAATGTTAGTATTTGTGTT…
TRINITY_DN35_c0_g1	TGCCCTCACAGGAAGTTTATTCCAGACTCCAACCACCCTCTACCACGGCTTCCAACCACCCTCTCAGTGAAAATAATTTTTCTCAGATCCAGGTGTCCCTGGAGAGGGAGCATGCCTATGTTTGCGGCCAGGTATCCCTGGAGAGGGAGCATGCAGTGTCCACAGGCACAGTTGATGCCTTCTGTGCCCTCTGGGCACCGCAGGGGCTGGGGTGCATTATCGACCCTCATAATCACATTGTAATTTGATGTTTTCAAATTTGCTTTGTACTTTGATTTTGTTCGGGCTGTTCCCCCTCCTTCTGGGGAGCTGCCCCTTTTACTTTGTCCTAATTTGACTTGAGTTTGTTTATTTGGTTTGACCTTAAAAGAGGCCAGCCACCCACAAGGTGAAAATAAT…
TRINITY_DN35_c0_g4	GAGACAGTGGGAAGTGTAGACAGAGTCAGTGAGCAGGCAGCTGGTTTGTGTGATGGATTGGGCTACATTCACATCTTTTGTAATTCCTTGTGGTGTTGGGCAGAGCAGAAGCCATACCAAGCTGTGGTACAACCAGAAAGAACGAATGGTTGATGAGTGTCGTAGCTAACATGCTAATTTTCCTTCATCTTCTGAGAAAGTACAGGCAGTAGCAGGCTTCCTTAACAATAATATCGGCAAGAGGGTCTAGGACAGGTTGTTGGTGATCTTGACAGCTAAAAACTTGAAGCTCTTAACCCTTTCTACTTTGGCCCCGTTGATTAAAGTTTCAAAATGATTTTTCATAACAATTGATAAAGAAGATTTGTACTGAGGAGTTATTTAAAGATGAAAGTAAAC…
TRINITY_DN35_c2_g1	AGAAACACAGTGCCCTCCACTCCACAGAATCCCTGGAGTGCAGAAGGAGGCCATTTGGCCCATCGAGACTGCATCAACTCTCCGAAATAGCATCCCATCCAGGCCCAACCCTCCGCCCTATCCCCTTGGCACCATGCATTTATGATGCCAATATTTAGACACTAAGGGGCAATTTAGCAGTGCAAGAGGCTGGAAATGAAGGGGCCCTGATGTCATAGAATCATAGAATCCCTACAGAGCATAAGGAGTTTTTGGGTCCATTGGGTCGCACTGACTCTTCAAAAAAGCATCCCACCTACACTTGGACACTAAGGGGTGATTTAGTCGGCCAATCCACCTAACCTGCACATTTTTGGACTGTGGGAGGAAACTGTAGCAGACATCGGAAGAATGTGCAAA…
TRINITY_DN35_c3_g2	GGCTGATCTTTTCATAGACTCAGCTCCACTTACCCGCCCGCTCACCACAACCCTTAATTCCTTCACTGCTCAAAAATTTATCTATCTTTGCCTTAAAAACATTTAATGAGGCAGCCTCAACTGGTCAGGGAATTCCACAGATTCACAACTTTGTGTGAAGAAGTTCCCCCTCAACTCAGTCCTAAATCTGTTCCCCCTTATTTTGAGGCCATTCCCTTTGAGTGAAGAAGTTCCTCCTCAACTCAGTCCTAAATCTGCTTCCCCTTATTTTGAGGACACGCCTCCTAGTTCTAGTTTCACCCCCCAGTGGAAACAACTTCCCTGCTTCTATCTTATCTATTCCCTTCATAATCTTATATATTTCTATAAGATCTTCCCCCATTCTTCTGAATTCCAGTG…
TRINITY_DN35_c3_g3	GGTACACTGAGGGAGAATTTAGCATGTCCAATGCACCTAACCAACACGTCTTTCAGACTGTGGGAGGAAACTGGAGCACCTGGAGGAAACCCACTCAGACATGGGGAGAGAGTGCAGACTTCACACAGACAGTGACCCAAACCCGGAATCGAACCTGGGTCTCTGGCGCTGTGAGGCAGCAGTGCTAACCACTGTGCTGCCCAGTTAACCCATTCAGAAGCTTTTATAAAACAAA
TRINITY_DN35_c3_g6	ACACCAGCGACTTCATGAGTGAGTGCAGCGAGTGGATTCAGCTGTAGCTGCTGCTGTTAATCACATCCAGGAGTGAGCCACATTCATTCTGAAAGTTGAGGTTTGTTTCTGCTGATGTTACTAATCCCTGTAGGTGGGCTGCAGCTTAATATTCTCGATCGAGAGCTGATTGCGTTTTGGGGGTTGCAGTTTCTCTTTAAGAACTGCTGTCTGTGATCTTTTCCCATCATTCAGGAACTCTCATCACATTCTTTACGGTACAGAAAGAGCCATTCAGCCCATCAAGTCTGCACTGGCTCACTGAAAGAACAAAATCAGCCCGGGAAACAGGCCCTTCAGCCCAACCAGCCTGC
TRINITY_DN35_c4_g1	GAGGAAACCGGAGCACCCAGAGGAAACCCACGCAGACAATGGGGAGAATGTGCAAACTCCACACAGACAGTGTGACCCGAGGCTGGAATTGAACCTGGGTCCCTGGTGTTGTGAGGCAGCAGTGCTAACCACTCTGTCACCGTACCACCCTAGCCGCAGTGCTTGTTGCTAGCGGTGATTTCTACTGTGTGTGCGTGTGTGTATGTATGTGTTTTTAAAAATATAATGTCTGTTTCAATGCACAGCTGGCGTACCTGTTGTCGCGGAGAGTTTTTACTGGAAATGTCACCTATGTACAATATCTCTTAATCCAATAACAACTCCCATCTACCCACAAGATCCTGCTAGTGAATGCTGAGCTCCCCTCCCCAAATGTGAAGATTGAGTTTTTATAATGTG…
TRINITY_DN35_c5_g1	GACTGGGATGGGTGCAGAAAGGTGTCTCTCAACATCGCAGCGTACCCAAACAGGCGACTAGGGGATTTTCACAGTAACTTCATTGCAGTGTGAATGTAAGCCTACTTGTGACATTAATCAATAAATAAATAAAGTGGGAAATTTGATTTGGTTTATAATTGTTGCATTAATTAGTATACAGTGAAAAGTATTCTTTCTTGCGCACTATACCATTCAGAGAGAGAGAGAGAGAGGGGGCAGAATGTAGTGTTACAAGTTGGGAAAGGATTTCACTCTGTGTGTTACATGTGCTGAAACTTTTTATGTTTGAATTGTTTCTGAGCACTTGTGCCTCTGAGATGTTGTTAATGTCCCACAAGAAACAAAATGAAAACTAAGTACCATTTTCTAAGATGCAGC…
TRINITY_DN35_c7_g1	ATGTAGACAATGACCCAAGCCGGGAATCGAACCCGGGTTCCTGGCACTGTGAGGCAGCAGTGCGAACCACTGTGCTAACATCGCGTTCGTTCAAATCCCCCACCCCTGCTGAAATAACAAAACACAACAGGATCACGAGGATCAAATACAGAATAAAATTAGGGGACGGTTTTATTTTTCCACCTCCTTTTTTAAACCTGTGCACAATTTCTGAGGTTCAGAACTCATTCAGTCCGTGGCAGATACCACCAGACTCTAAAACTGAGCAACAGGATCGCAAGGAAAACTATCAGGAATCATAGAATCCCTACAGAGCAGAAGGAGGTGATTTGGCTCACAGAGTCTACACCAACCACAATACCAC
TRINITY_DN35_c8_g1	GTTCAAGAAGGCAGCTCACCGCAACTTTTTCGAGAGCCATTAGGGATGGGCAATAAATGCTGGCGTAGCCAGTGATGACCACATCATGTGAAAGAATATAGAAATGTCAGATTCTGTGCTCGGGTCTCTGGAGTAATATTGAATCCACAATCTCCTGACTCATGTGAGAGCACTACCCACTGAGTCACGGTCGATAATTAATTGGAGGTTGAGCCAAGAAATGTTCTGCTGTAAATCTGTACAGGAGGCAGGATTGAGTGATTAATATATCAAATGCTTTATTGTGAATACAGGATAATTATATTTGTGATCCAAATTAATTTGCTGCTGTTCCAAGTTATGTGCCTTGAGAACAATTTGAAAATATTTATTATTTGTTGAGAGGTCTCATCCACTGCG…
TRINITY_DN35_c9_g1	CAGTGACCTGAGCCAGGAATCAAACCCAGGTCCCTGGCGCTATGAGGCAGCAGTGCTGACCACTGTGCCACCCATGTGGATGCTTGATTTCCAGTTTTTTAACAGCTCTAGACTGAGGTCAAATTAGACACCTGTCTTCTGACTCCCATATAGGAAATTCTCAGAGAGACTTATTTCCTGGCAGATTTCAGTGTCCAGCTTCAGAGAGAGAAAGCAGAAGCTCTGCTCTCTCACAATTCCAAGCAACATCACACTTGATTTTTCCATATCAGCCTAGCTCCACCCAGTCATATAGCCTTACCTACCAATCAACCCCTACTCTGCAAAACCCCAGGGGAAATCACAAAAAAATAGAACAGCATTGGTTCAGTTTGAAACAAACACTCTAGCAACAATTAT…
TRINITY_DN35_c13_g1	GGTTGGGGGGGGTGGTGGGGGGGGGGGTGCGCGGTGGTGGGGGTGCATGCCAAATATGGAAGTATGTGAAATTGTGCGATAAGTTGTTGGGTGTTTGTCCGGAATGTCATTGCGTGCTCTAAACTTAAGCAAGCAATTTAGCCCATTATAGGTCAATTGTGCGCGATTTTAATTGGCCCATCTGCTTATTTGGCAGTCTTTACGCTTTATCTTCAGGGCAGGATGAAATGCTCATAGATCAGAGAAATCCTACAGTGCAGAAAGAGGCCCTTTGGCCCATCGGGTCTGCACCAAACACAATCCCATCCAGGCTCCACCCCC
TRINITY_DN35_c14_g1	GGAATACTTCCCACTTGTCTGGATGAGTGCAGTTCCAACAACACTCAAGAAGCTTGACACCATCCAGACAAAGCAGCCTGCTTGATTCGCACCGTATCCACTCCCTCCACCACCAATGCTCAGTAGTGGTGATAGCAAAAGAAAATGCTGGATAAACTCAGCAGGTCCAGCAGCATCTGTGGAGAGAGAAACAGAGTTAACATTTTGAGCCCATCTGACCCTTCTACAGAACCTAACATAAATAAGCATTATATAAGTATAATATAAATCTTGCTTGTTCAAATAAGATAAATTACGCTGTCTAACAGATTCATTCTTATCCAAGTCGAACTACTCATTTTAGATTGATGATGCAAGATGAGCATTCATTATAGTAATAGTGGCACGTTTGACAGTAAA…
TRINITY_DN35_c19_g1	GCACTTCACAGATATGATAGGTTGAAATGAAGTGATGTGTGGGATTGTGTTCGGTGAAGACTCGATGGGCCGAAGGGCCTGTTTCTGCACTGTAGGGTTCTATGTCTATATGATAGGCTGAAATGAAGTGATGCAAGACCTGCTGGCTATGGCCTTATAACTGGTAATGTTGTGGCTCTGGCATCATTCTGTCAGCTGACAATTTGTAGCTCTGTCAGCTGACAATTTGTAGAAGGAGCTTCATATAAACATCATATAACTGGCAAACATCCCAGCCGCTGTGCCGACCATTGAGGTGGGGATGGGGCAGATAATTGGGTTAAAGTTCAAAACCAGAGAGAGACCGAGCTAAACTGAGCGACTTAACTTGTGCTTAGTTTGCTCTTTGGAAGTGTACTT…
TRINITY_DN35_c22_g1	CTACACCACATAGACTGCAATGTTTCAAGAAGGCTGTTCACCATCACCTTCTCAAGGGCAATTAGTGATGGGCAATAAATGTGTGCCCTGCCAGCAAAGCCCACATCCTGTGAATTAATAAAACATATTAAGAAACTTTTAGCCATGTGTACTAATCTTTGCTTTATGAGGCTCAATGTCCAAATTGCTTTGTAATGTTCCTGTGAAGAGCTATGGAATGATTTATTTCATTAAAGTTCCATGAAAATGTAAGCTTTGGTTGTGTTCAGCTCAGCAGAAACAAGGGCACCTGACAAGGAATATACTGCTTCTGATGTATACACTTGTAACATCTCGATGCCGTATCATCTCATATCTTCACTGTCAAAAGATAGATCATGTGCTTTTTGCAATATCAGA…
TRINITY_DN35_c25_g1	CCCCCCAACACCAGGGTTAATATAGCAACTGAAACTGCACATCTTTGGACCGTGGGAGGAAACCAGGAGATCAGGAAGAAACCCTACACACACACACAGGGAGAATGTGAACTGTCACAGACAGTGACCTGGAATCGAACCCAGATCCCTGGCACTGCGAGGCAGCAGTGCTAACCATTGTGCCGACCCTGATGGGAGTTTGCAGATCTAGTGGCA
TRINITY_DN35_c27_g1	ACCATTCACCTGCTCTCAGTGTGGGAAAGGATTCAGTGATTCATCCCACCTGCGGACAATTCACTAATTCATCCAACCTGCGGACGCACCAGCAAGTTCACACTGGGGAGAGACCATTTACCTGCTCTGACTGTGGGAAAACATTCACTCAGTCATCCCACCTGCGGACACACCAGCAAGTTCACACTGGGGAGAGACCATTTACCTGCTGTGTGTGTGTGGAAAGGGATTCACTAAATCATCACAACTGCTGCGACACCAGCGAGTTCACAAGCAATTACAGGGATTGGAGACATCAGCAAATTCACAAGGGATGACAGGGGTTGGATTCTGCTGTTATTGCTGCTGTTAATCACATCCAGGACTGAA
TRINITY_DN35_c29_g1	CTTCGTTGTCGCTGGGTCAAGTTCCTGAGACTCCCTCCCCAACAGCGCTGTGGGTGTACCTACACTGCGCAGACTGCAATGGTTCAGAAAGGCAGTCACCATCACCTTCTCAAGGGCAACGAGGCTGGGCTATAAATGGTAACCTTGCCAGTGACCTTCCCAAACTGAGAACAAATTCAAACAAGCTGAGGTGCAGCGGCTATCGTTGTTGCGATGCAGTTGCTCCATGGAGTTTTTGGGCATCAGAATCAAGTCGGTTTTTTTTGTAAATGCCTTGGTTAAGTTTGACCAAGTTTGATACGCTGTTTCAATGCTGAAACCTATTTTTAACATCAAGAGTTCCTGCCATACGTGGTGGGGACTGTACTATTGTTGGAATTCCAACTCATCCAAGCAGAA…
TRINITY_DN35_c32_g2	CACCGCCATTTGCAAGTTTCCTTCCAAGCCACTCACCACTCTGACTTGGAAATATATCACCGTTTCTTCACTGTCACTGGGTCAAAATCCTGGAACTCCCCCACCTAACACCACTGTGGGTGGACCTACACCAAATCAACTGCAGCAGTTCAAGATAAAGGCCCAGCATAATCTCCTCAGTGCATGGGCTGGGCAGTGATGTCTGCATTCCCAAAGTGAATTTAATAAAATTAACATTCATACTCGTAAGTGTCAGGTAATGATTATTTTAAACACTTTTCCACTATCACCGATATACCCCCAGTATCAATATCTTGGCTGCTATCAATAGCTGGATACTTATGTGGACGGCCCATATCAGCACGGTGGTTACAAGAGCAGGGCAGAAATTCTCTATAT…
TRINITY_DN35_c32_g3	ACAGCCTACCACCTATTTGGGTCACCTAACCAGCAGGTCTTTCAGAATGTGGGAGGAAACTGGAGTACCCAGAGGAAACCCATGTAGATGTGGGGAGATTGTGCAAATTTCACACATGGTGACCCAAGCTGCGAATTGAACCCAGGTCCCTGACACTGTGAAGCACCACTGTGCTGCCCCCTTCAAAAGTGCTAGCACAGACTTGATGGGCTAAATGGTCTTCATTGTGTGGTACTGTTTGATTTCACACAAGTTCTTTTTGAAATCTGGTCACAGACCAGGGAATAACCTTGGCCCAAATTAACCAGTTGCACCTCAAAAATAATTCCTTTGTGTAAAAGTTTACAGAATTAGCTCAATTTATTCCTTTTCATCCATTTTCCGTTCTGCCTTTATCTG…
TRINITY_DN35_c37_g1	GCACATTACACACAGCAACATCTCCATTATCTACCAGAAAGAAAGGGAATGGGAATTCGTGGAGAGCTCACAAATGTTACCACTCTCCTGTGTGGTACAGGAATTCCTTTGGAATGGGAATGGAGACAAGTTCAATTCAAGTAATGGACTGTCAAAAATCACTGACTAATACTGTTATAAAATCTTCAGAAATTTATGGACTATTATAGAAATATTTCTTGCACTGTTCTGAAAGTTTCCAGAGCAGCTTGCTGGCTGACAAACACAGGACAGGTTTGTTATCTCTGTCAAGGATGTGTCGCTAGCATAGGCCCCAAAACAAGGCATAACTCTATGATTGGATCTTATGACCCACATGTAACCCAACTGCCTGTATATTGCTTCACAAGAGTAAAGTGA…
TRINITY_DN35_c47_g1	CTTAGCACATCTGACAGCACATAAACATAGAATCTTTGCAAAAAGAGGCCATTTGGCCCATCAAGTCTATACCAACTGTCTGGTAGAGAATCCCACCCAGGCCCTTTTCAGTAATGCCATGTACTTACCCAACTAATCTCCCTAATCTACACATCTTAAGGCACTAAAGGGCAATTTAGCATGGCCAATCCAACATCTTTGGACTGTGGGAGGAAA
TRINITY_DN85_c0_g1	TTTCTCTTTGCTTTTCTTTTATTTTTATTTTTTTGGGGGGGGGGGGGGGGGGGTTGGTTTGATGGATAAATGGTACTCCGGGTCTTAGACGTAAATGCAGGGCTTTACTGTGCATCCCTTTTTATTATTATTATTATTATTCAGTGAGATGCAGATTCCCCATCCCTAATTGTCCCTCGAGAAGGTGGTGGGTGAGCCGCCATCTCTTACCCCCATGTGGCCCACCTGGGGTAGGTTCACCACCGTTAGGGAGGGAGTTCCAGGATTTTGACCCAGCGAAGGGAACGGCTGATACATTTCCAAGTCAGGATGGTGAGTGACTTGGAGGAGAATCTCCAGGTGGGGGTGTTCCCAGGTACCTGCTCCCCTTCCAGATGGAAGTGGTTGTGGGTTTGGAAG…
TRINITY_DN85_c2_g1	CTAATTTGGAAATGTATCAGCCGTTCCCTTCGCTGGGTCAAAATCCTGGAACTCCCTCCCTAACGGTGGTGAACCTACCCCAGGTGGGCCACATGGGGGTAAGAGATGGCGGCTCACCCACCACCTTCTCGAGGGACAATTAGGGATGGGGAATCTGCATCTCACTGAATAATAATAATAATAATAAAAAGGGATGCACAGTAAAGCCCTGCATTTACGTCTAAGACCCGGAGTACCATTTATCCATCAAACCAACCCCCCCA
TRINITY_DN97_c0_g3	CCCCCCCCCCTCCCCACTCCCCCAGCCATTTCCTCTCCTCCCTCCCCACATACACACCATATACCCCAGTGCTAATATCTACTGTGTACACAGCTCCTTCCTCTAAATGTGCTGTGTGCCCATCAGAGAAGGAAAGACTGAAATGATGTGTCTTTCGCTGGCTGTGTCCGTATTTAAGCCCCTTCGCTCTCGTCAAACTTTCACAATCAAGCAAAAAAACAAATTCCTTTTGATCTACTCTTGTTCCCAGCGAATCGCTGGCAGACACAGATTTTTTTTTGGTCTCTTTATAAAATTTGAGGGTATTTTTTTTTGTTCTAGAACAAGCAAGCACCACTCCAATCCCCACCGCACCCCCCTCCACCTTCCCACATCCCAAGAAGAGAAACTCAGAAGTGT…
TRINITY_DN12_c0_g2	GATTGGAGAATGGGGATGAGAATCTTATCAGCCGTGATTAAATGGTGGGACAGACTCAATGGGCTGAATGACTTAGTTCCGCTCCTATATTTTATGGTCTTAAGCCCTGTCCTTATACTTGATAAAACTTACAAACGTAATCAAGTCATCAAAGATGAATCACAATGACTTGATGTTACCCTAGGATTACGCAGAAGCTTGACAGCATTAGCCCTGAAAATGTCACAGCTATCATGAAGGAAACCCAGTCAACATATACAATCATTTTTCATTTTTATGAGCGTTTATAGTCACTTAACACACACAAACAAAATCCCCTGTTCAGAATTAACACTTCAGGGCAATCACCTCTCCTCCAGCATTTTATTTTCTTTTTATTTCAAATTTCCAGCGTCCTCG…
TRINITY_DN12_c0_g3	TTTCTAAATGGACTGACTGCGTCAGACTTAGAAGATCTTCTTGAAGATATCAGAGTATGCACGATAATATTCCCTCTTCCTCAGTGATGTCTTGAGATTTGGTTATTGGAGATTCACAATCACCAGGAGGCTTTCACCACTGCCACCATCTCAGGAAACTAGGAATAGGCAATAAATGCCGGCCATACCTGTGATGCACATATTTCCTGAGAGATTTTTTTAAAACCTAAATTTAATGTTATTTCTGTTCTGGCAATATTTGATTTTGACACAGGAAAATGTTTCAGCGTTGGCATGCCTCAGCACCATAAGCAAAAGAATTTTCTTTCAGTTGTTTCAATATAACTATCATGTAGTAATAGTAGTAATTATACTGAATTATATTCAATAACTGCTTGA…
TRINITY_DN12_c1_g1	TCAAAAATTAGACTAGTGTCAAATGTTTTGATAATATTTTAATTTTTTTCTATTTTTTTTAAAGTCCAGAGTTCCAATTTTGAGATAAATTCACAGCAGCATTAAAGATAGGTGTGTTTGGAGGAAAATAATTATTGCAACAATAGAAACTGTGGCGATTTCATCTGAATTTATTCACTAAGATTTTATAGCATTATTTAGTAGCCTCATCCAAGTAGAAAACATATATAAATGAAAGATTGTACAGTAGAAACAGGGACCAGATGTTCAACAGATATAAAATAAAGGTTATACAAGGAACTTTATGTTCTGTTATAGGGATCTTTATTTTCACTTCTAAATGTTATGTCTTTTTCTGAACCTATTACATTTCTTTTGGATATTTCTGCATTCACTAAT…
TRINITY_DN12_c2_g2	CAATGGACCCAGGCTGCTTGTGATGTGAGGCAGCAGTGCTAACCACTGTGCCACCATTCCACCCGTTTCTGCATTCTGTTTGCTGTTTAAATGATGATTAAATTACTTCTGAATTCAAAATTGCCAAATCATAAAATATTATGAAAAGGCGATTGCATTGGGGTCACCTTTCAATGATATTTTAAAGCAGTGGGGAATAACCCATGGAAAGATCTAAAATGAAGTTAAATCAACTTAAGAAAAAAGAAGCAAACTTGGCCTTGACTACTGGAATATCATCAGTATATTTTGATTGAGCTGTTACATGTATTTAAAGAAATATTTATGTGCTAAATGATGAAATGTATGGGGCTGGATGTATAGTTAGTCGGTAAGTCTCTGTGCATAGGAAATATCATA…
TRINITY_DN12_c2_g3	TCCTTCATTAGGTGAATGGAATCTGTTCCACTCGCCTGATGAAGGAGCAGTGCTCTGGGGGCTCGTGATTCCACATAAAGCTGTTGGAATTTGGCCTGGCATTGTGAGACTTCTTACTATGGGTTATTTAGGCTAATTGTCCTTTTTTGGTTGAAGAACCCCTCTTCAAACGGATTAGTAATCACAAGAGGCCTCCATTTAAGTTATGACAGAGAAACTCTTGGTGTAAAGTTCCTCAGTGCACTGTGAAGGGGCAAAGTTGTTTTATCATGTTGGCACAGTGGTTAGCACTGCTGCCTCAAAGCACCAGGAACCTGGGTTCAGTTCCCGCTTGGGTCACAGTCTGTGCGGAGTCTGCACGTTCTCCCCATGTCTGCACGGGTTTCCTCCGGGTGCTCT…
TRINITY_DN12_c4_g1	TGAACATATGGGCGGCACGGTGACACAGTGGTTAGCATTGCTGCCTCACAGTGCCAGGGACCCAGGCTCAATTCCTGCCTCAAGTCACTGTCTGTGTTGAGTCTGCATGTTCTCCCTGTGTCTGCGTGGGTTTCCTCCGGGTGCACCGGTTTCCTCCCACAGTCTGAAAGAAGTGCTGGTTAGCTGCATTGGCCATGCTAAATTCTCCCTCAGTGAACCCGAACAGATGCCAGAGTGCAGCAACTGGGGGATTTTCACAATAACTTCATTGTAGTGTAAGTCTGCCAATGACATTAATAAATAAACTTAAAACTAAAACTTAAAAACTGAAATTAAATGTGCTGAAACCCTGTTTATTTTTCTTGTAAACATCCAATCAAAAAACTTCCCCTCATCAAA…
TRINITY_DN12_c5_g1	TTTTTGTGGATGCTGCCAGACCTGTTGAGATTTTCCAGCATTTCCTTTTTTGGTTTCAGATTCCAGCATCCGCAGTAATTTGCTTTTGACAATCCGTAGCTCAGTGTTTTCTTGATAACAACCTGCTTTGTGGCACCTTATCATGTATGGTAGATTTTTTAAAATCTAACAGATTCTGATAATATAAAAGATGCTTTCAAAAATATAAGACAGATCTCAACAAAGATGAATCAAATGTTTCTCTGCTGTTGTAGGAGCCTGCAGCCATGGAAGGTTAAAACTGCCTTCATGTCATTTATTGTAAACCTCTAAACCCTTTGCTGACTACATGTAGCAGTTGCAGCTGTAACATTTGCACATGAGATCAAAGATGCCTCAATGTTAGAAATGACCCAATAA…
TRINITY_DN12_c7_g1	CTGATTAGGGAACAGCTCTCTGAAAGCTCGTGCTAAGAAATAAATCTTTTAGACTTTAACCTGGTGTTGTGTGACTTCCTACTGTGGCATTTGACTGGGGTGAGCACAGTGAGAGAAGTTTCACAATGTCGGGTTGGTGTCCATCAGGTTTATTTGGAATCACAATTTCAGAGCTGACAATACCAGATGGACCTGTTAGACTTTAACCTGGTGTCGTGTGACTTCCTACTGTGGCAATTGACTGGGGTGAGCGAAGTAAGGAGTTTCACAGTGCCAGGTTGGAGTCCATCAGGTTTATTTGGAAGCACAAGATTTCGGAGCTCGTGATACCAGATAGACCTGTTGGACTTTGACCTGGTGTCGTGTGACTTCCTACTGTGGCAATTGACTGGGGTGAGC…
TRINITY_DN12_c8_g1	GCAGGAGTGTTCTCTTCCTGTTAGGGAACACTTCAGCAATCACCGGCATTCAGCCTCTGATCTTTGGGTAAGCGTTCTTGGAGCAGCCTTCACAACACACGAGCGTGCAGAGTTGCTGAGCAGAGACTCATAGCCAAGTTCTGCACACATGAGGATGGCCTCAACCGGGATCTTGGGTTCATGTCACACTATCTGTAACCCCCACGACTTACCTGGGCTTGCAAAATCTCACTAACTGTCTTGGCTGGAGACAATACACATCTCTTTAACCTGTGCTTAACTCCGTC
TRINITY_DN12_c9_g1	TTGTTTTGTAACTGGTCGGCGCAACATCATGGGCCGAAGGGCCTGTTCTGCGCTGTAATGTTCTATGTTCTGTTCATCTGCTCTGAATTTGCTTGTTTATCCAACCTGCTGAGTCATCACCAAGTTCACAAGTGACTACATTATGTAGGATTTTGTTCGTCATATCCAGCATTGAACCATGTTTATTGAGTCTGGTATAACACCAGGCCTGTTATGGGTGGTAATATTAGGGATAAACGTTGCATAAACGATAAAAGCAAATTACTGCGGATGCTGGAATCTGAAACCAAAAAAGGAAATGCTGGAAAATCTCAACAGGTCTGGCAGCATCCATAAAAAAAGAAAAGAACTGATGTTTTGTGTCCAGATGACCCTTTGTCAAAGATCTTTTTTCTCCTT…
TRINITY_DN12_c10_g1	GAGAAATCCCCTTTGTCATCACACTCCGGCACCTGTTCGGGTACACTGAGGGAGAATTTAGCACGGCCAATGTACCCTAACCAGCAGTGACATAGCTGACTGTATTACGGCAATCAGGACAGTGTAAAGTCCTCCATATGTGGTCCAGCCCAGGCTCAGCTAGTTTTTAACACAAATTCCGATCCCATTTGAAGCCTTGTGGCGCAGATGGAATTTTAACAGGTTGGCTAACCCGCGTTGCCACTTTCTATCCCCGATCCTTTTCTGTATGTGATGTAAAGATGCTGGCGTTGGACTGGGGTGGGCACAGTAAGAAGTCTCACAACACCCGGGTTGGGGTCCCACGGGTTTGTTGGGTAGGACAAGC
TRINITY_DN12_c17_g1	TTCGGAGAGTTGGTGCAGAATCAATGGGCCGAATAGCCTCCTTCTGCACTGTAAAGATTCTATGATGGAGGGCCAAATTGCTGATCAAGGAAGAAGAAACAGGGTGATTGACTAGACTAGAGAAGCTGAGGTTATTCATCTTGGAAAAGAGGAAGTTAAGGGACATATAATGGAGATATTTAAATCATGAAAAGTTTTTATGTGTTACATGAATCAAAATTTTTCAGTGACAGGAGGGTTGGTAAGCAGAGGGCACATTGAAGATACTTGGTAAAAGAATGGAAGGGTAAATGATCAAGAAATTATTTGGCGGGAGTTCTTATTTGGAACACTGGAAAGCATGGTATAAACTGATTCAATAGTAAATTTTAGAAAGGAATATGTAGCTTAGGGGAAGAG…
TRINITY_DN12_c21_g1	CGTTGGCCATGCTAAATTCTGCCTCGGTGTACCCGAACAGGAGTGTGGTGACTAGGGGATTTTCACAATAACTTCATTACATTGTTAATGTGAGCCGACTTGTGACACTAATAAATAAACTTAAAATATAAAGCCAGCCATGAAGGTGACATTGAAATAATGCTTCCTGAAGTGTTATTCAATATTGTCAGAGAATTGTATAAAATCGTAGCAAACCCTCTGTAATCACAGGAGAAAGCATCTTATATTACTGTGCCCCAGTCGACTCTCCAAGAAATGAATTCCAATACTTACAGTACTTACACCTCTGCTAATAAAGTGGCAGTGATTTTGTTACACG
TRINITY_DN12_c22_g1	TAGCAGTATTTCAAAGAGTGGCCTGGGTATGATTGTTGTCGGTGCAGGCTCAATGAGCCAAATGGCCACCACCTGTGTTGTAGGGATTCTATAAGTGACTTAATCAATAATCCTGAAATGTGTTAAGTATTATTCCTCCCTCCTCATTTTGCTTTGCTGGATCTTATGTTTCTTACAAATCCAATTGTTCCTTCAGAACTCACCTTGACTTCCACCTAACTTCAGGAACATGCTTGTTCACATTTCAGACATATTTTACAATGTAACCAATTGCACCTAATCAGTACGTCTTTTGTAGTCAGCTGACTACAACATACTGTTGTAGTCAGCTGACCCAGTAGAACTAGGAAGCAGATGGGGATTGGAAGGGGCATTTACAGCCCAGGGCGTGGTCCAAGT…
TRINITY_DN77_c0_g3	GGGGGCACGGCCTCAAAATAAAGGGGAGCAGATTTGGGACTGAGTTGAGGAGGAACTTCTTCGCCCAAGGGGTTGTGAATGTGTGGGATTCCCCCTGCCCCAGCTGAATGTTTTGACCCAAAGGGTGAAATGTGTGGAATTCCCCCGGCCCCAGCTGAATGTTTTTGAGACAAGGATTTTTGAACGGGGAAGGAATTACGGGGAGCGGCCGGTTAAAATCCACTGCAGATCGGCCCTGATCTTATTGAATGCCGGGGCAGGATCGAGGGGCCTGCTCCTAATTCTTGCGTTGTGACACGACATAAACAAGCTTTAAAACTTGCATCAAAGAGCATTAAAACCTGGCACTCTGTTGTCACCGGTGGAGCGATCAAGTCGAGCATTAAAACCTGGCACTCT…
TRINITY_DN77_c0_g4	CAATTGGACTGGTTCCCATTCTTCACCCTACCTATTCCTCCCTCTCTCCCTCCCTCCCTCCCTCTCTCCCTCCTTCCCTCATCGAACATCCAGGAATCATCTGAAAAGAGCTGTGATGAATGAGGGAAGGGGTCCTTATCACTGGCACCATTCCAGCCAGCTCACTGTTCCCCTCCTCACTTTGCCCAGCTGATTAACCGCGTGTGTATCCCTCCCCAGGGTTCATCCCAGCCGGACATTCTCGACATTCCTTCTCCTGGAATAAGATGTTGATAAGGGATTGTCCACGTCTCCACGTTGGATTGTGGGGGAACACCTTGAGCCATAATGAAGGCATGGCAGTGCTGGAAAATCCCGGCAGGTCTGGCAGCATTTGTGGAGAGAGAAATCGGGTTAACG…
TRINITY_DN77_c1_g1	CCTTGATCAAATCTCTCCTCAACATCCTTTGCTCCAAGGGGAACAACCACAGCCTGACACGACTCAAGCCAGGAATCGCTGTGTCCCTGGCGCTATGAAGCAGCAGTGCTAACCACTGTGCTACCCTCCACTCTCATAACCAGCAGAGCTACCCTCCACTCTCATAAGCAGTGAATTCCAGGTCACTCCCATTTGCATTAAAATATTCTTCCTCACATCCTCCCCTTACTGAGAATCTTAAATCTGCGACCCCCTCGTCCTTGTCCCATCAGTTAGTGGGAATAATTTTTCTTTGTCCACCTTATCTCAATCTGTCAGAATCTTTTCCACCTCAATCAAATCTCCCCACATCCCCCTTTTGCTCCAAGGAGAACAAATCCAGCCTGACGTCAACAATAA…
TRINITY_DN77_c3_g1	CTAAAATTGCCTGTTTAGTGTCCCAAGATGTGTAGCTAGGGGGATTAGTGGGGTAAATGTATGGGATTACAGACATAGGGTAGGAGAGAGGACCTTGATAAAGTACTCTATCAAAATATCAGTGCAGACTTGACCTAGTTTGCACAGTAGGATTCTATGATTTTTAAAAACAAATCAAATCAATGTGCACTGCGTTCTAAATTCACTGCTGCCTGTGGTCAATAGCACATCTATAATGTGTCTTCCTTGTATCTAGTTCTCTTACCCCAACCCCAGTCAAATGAAACTTCATTCAAGGGAGTGTTAATTTTTTTTCTGAATTTTTTCTTTAATATTGTGTATGTCTGAAAGTGCTGAAGAAACACAAAAGGTCCACCAGCACCTAACAGTAGGAAAAAA…
TRINITY_DN77_c4_g1	TAGTTATCCTTGAGAACATGTTGGTGAACTACTTTCTTGAACCACTGCAGCCTCTGTGTTGTAGGTACACCCACAGTGCTGTTAAGGAGGGAGTTCCAGGATTTTGACCTGACGACTGCAAAGGAACGGCGATATATTTCCATGTCAGGATGGTGAGTGGCTCGGAGGGGAACTTGCAGGTGGTGGTGTTCCCATGTATCTGCTGCCCTTGTCCTTCCAGGGATCACA
TRINITY_DN77_c10_g1	AGTGGCTTAGAGGGAAACTTCCAGGAGATGGTGTTCCCATTTATCTGCTGCTCTTGTCCTTCTAGATAGGTGCTGCCTAGGTGCTGTTAATTTAGCACAGTTGATTGAATGGCAAAGCAATGCCGATAGCGTCAGTTCAATTCCAGTACTGTAGCATACTGAAGTTATTCATGGTTATTCTTAACCTTCCTTCTCATAGAATCCTTACAGAACAGAAAGAGGCCATTTGGCCCATTGAATCTGTACCAATCACAATCCTCCCACCCAGGCCCTATTCC
TRINITY_DN36_c1_g1	TGATACCATAACGTACTGAGGCTCTGCATGGGCTTCCTCCGGGCGCTCCAGTTTTCTTCCACAGTCCGGGGATGTGCAGGCTGACTCCAGTTTTCTTCCACAGTCCAGAGATGTGCAGGCTAGGTGGATTGGCCACGCTAATTGCCCCTTAGAGTCCGAAGATCTGTAGTGTAAGGGATTAGTGGGGTAACATGGATAGGGTCTGGGTTGAATGCTCCCTCGATGGGTCGGTGCAGACTCGATGGGTAGGGATTTTGTAAAAATCCATCACCTTCCACAGACATATAATTGGGCTCAGTATATTTGATCCTTGTAGAGCTTCACGAAGTGAAAGTTGTTTTTTTCCCTCCCCTCATGTTGAAGAAATTTGGGCTGTTGTTTTACGCATGAACTAATGTC…
TRINITY_DN26_c0_g1	CTGAGTTTGCTCAGCAAGGGGCGAGCAGCATGTCTGGAAAAAGAGAGAGAGAGAGGGGGGGGTAACGTTTCACATCGAGGACCTTTTGTCAGAACAGTTGGTGTCGGTGATGCAGAGCTGTCCTGGCAAGAGGTCATTGATGTGGCATGTTCACTCTCGGCTTCGCCTGTTGTCAGACCTGCTGGGTATTTTCACCTGCTTTCCCTGGGAACACACAGTCGGGGCGTGAGAAGTCTCCTGAGATGATCGAGCCTGTGATGTGTTGGTTTAGTGATCACAGCTTGCATGCTTCCATTTTATGTAAAAAGAAACACATCCCATTGCCTCTTAGGATAAAAATTAACCGGTTATTAATTCCTGACACCGCCTCGCAGAGCTTTGCAGCAAATGCTCTCACTG…
TRINITY_DN26_c0_g2	CAGGCACCGGAGTGTGGTGACTAGGGGATTTTCACAGTAACTTCATTGCAGTGTTAATGTAAGCCTACTTGTGGCACTAATTAATAAACTTAAACTTAAAGGAATTAGGAGTAAATGTAGGCAAATTCAGCCCTTCAAGCTTGCTCCGCCATTCAATGAAATCATAGCTGATCTAGTCCTAGTGATGATCTGCATGAAAGGACATTATGGTCAGAGGTGATGCCAGTGATAAACAGTGCCGCCCAGAGTGGATGTCCAAATGGAAACATTATGCGATGGAATTTGTTAGATTTGGTTTAATAGACAGAAAGTGAGATGGTTTCAAATACAGAAAGTATGTGCAGGTATGTTAATGATAGACAGAGCGTGGTGACCAGTGTTTTATTCACCCCACTCACC…
TRINITY_DN26_c3_g1	GGCAGCATGGTCAGAGCAGGCTTGGAGGACCGAAGGCCTGCTTCTGTGCTGTAATTTTCTTTGTTTTTTGCCTCTGGGTGTGTACTTTTACTCCCGCTGTCTGGACTGTGGTTTTTCCTTGCATTAGGTAATTAGCAGTGGGCCCAAATGAAAACTCCAATAACTGCATTTTGGTGAAATGGTTACATCATTATAACCTCCTGTGACCTTCCAACAGCTGGGAATGAAGGGGCAAATTGTGACATGGCATCAACCCTCAGTTCTGTGGTGTTGGAAGTAGCAGTTCGATTCTTCTATGGCTCTACGACAAATTAGCTTTTTTTGATGGAGGCCACTTTCTAGGCCATATCTGTGTCAGTTGGTCCAGTGAAATTTAAATTTTCATGATTAAGGTGGAAC…
TRINITY_DN26_c4_g1	CTGGATTTCCCCTTAATGTCAGGGGGACTAGCAGGGTAAATACATAGGTAGTGGGGATGGAGCCTGGGTGGGATTGTTGTCAGTGCAGGCATGATGGGGCCAAATGGCCTCCGTTTGCACTGTAGATATTCTATAATAGCTTAAATATATTGCTGTCCCGTTATTACTTATAGTGTTCTGAAGAATGCATTTTTAATAATAAAAGTTGTGGAAAATTGACAGTTCAAAATAATTTTGGAGCTGTATTCCATAACCCTTTATGCAGTCTGGTATTTATACATTTATAGGATGGTAACACTGCACTTTTCCATGTTTGCAAACAGGAGGGCACATTGGGAATTGTGCATGTTGAAATTATTTTTTATCTTGACTTTCATAAATGTAAGTACAAAAACTGCA…
TRINITY_DN26_c6_g1	TGGACTAAAACCTGGTGTTGTCAGACTTTTTACTGTGTTTACGCCAGTCCAACGCCAGCATACCCACATCATGCCCAGGGGCATTGCCAGGGGGCAATACCCAAACACTGCTAGACTCCTGCCCGAGTATGAACCCCCCACCCGGGGAGGGGGGTTCATACTCTGGCTTCAGTTTGCCAGTTCCCTGTTTGTCCAAACCTGTAGTAAATGCTGGGGATGTGGCAATGGCAGAAGCTGGGATTTCCCTATGTGGGGGCTTGATACAGCAGTAAGGCCTGATACACAGGTGTGTAAATAATAATGGAAACCCTGATCTTTCATTGCAAGAATCCTGTTCAGTCATTTACAAAGGCTGAGGGCAATCTGACCGCCCCCCCTCTCCCCCGCAAACCATTGCAA…
TRINITY_DN26_c10_g1	CTTTGCTTGTATAGCGTGCAAGAAACAATACTTTTCACTGGTTCCCTGTACATGTGACAATAACAAATCCAATCAAATCAAACATAACTCAGATCTAATGACCCAGACATTGCTGAAGGGGAACCCACGGGAGATTAGCGTCACTAATCTCTCTTCACTGAGTGAGAATGCAGAGGCTGGAACGCCCGCCCCGATTCTGAGGGTGGGTGAGGCTCTGAGAACGGCAATCTCCATTGGTCTCAGGCAAGATCATATGAAGCTCAGGCAGACGTGCCGGTAAAAGTCCGCCCAGAGTTTCTCATTGATGAGCTCATCAGTGGGAGAATCAGATACGTCCCGTAGGTGAAATGTACATTTGAAGTGTAATTCCCAGTGTTTTGTGAAGTTACATTGGATGTT…
TRINITY_DN28_c10_g1	GTTAAAGGCTTTACTGAAATCCATATAAACTACATCAACCGCACTACCCTCACCTACACACTTTTTGAAGAGGTGACAAGGTGTGTTGACAGTGGGGGGGATTCAGTGATGGTAATAACGTTGAATGTCAAGGGGCGATAGTTTAGAGTGTTTGCTGATGAGCATGGGAGAGGTGCCAGACAACTGGAGATCAGCTAATGTGGTTCTACTATTTAAGAAGGGATGTAGAGATAAACCAGGGAACTACAGCACAGTGAGTCTCACATCAGTGACAGGAAAACTACTGCAGAAATTTCTGAAGGAGAGAATCTATCTCCATTGGAAAGGCAAGGCTTGATCAGGGGTAGTCAGCATAGCTTCAGAGAGGGAGGGTCATGTCTAACAAATTAGACTGAATTC…
TRINITY_DN0_c1_g1	CATGGGTCTGAGTTTTGAAGTTTCTATCAAAGGATCCTTGGTGAGTTGCTGCAGTGCATCTTGTAAATATTACACACTGCCGACACAACGCACCCAGGGTGGGGGGAGTAAATGTTTAAGGAGTTGGATGGGTTGCTTTGTTCTGGATGGTGTCAAGCTTCTTGAGTGCTGTTGAAGCTGCACCCATCCAGGCACATGGAGAGTACTCCATCTCACTCCTGACTTGTACTTTGTAGATGGTGGACAGGCTTTGGGGAGTCAGGAGGTGAGTTACTTGCCACAGAATTCCTAGCCTCTGACCTTCTCTTGTACCCACAGTATTTATATGACTGGATCCAGTTCAGTTTCTGGTCAATGGTGACCCTTGACAGTGTATCAGTGTTGTTCTTGATTCCTCTG…
[truncated: 20,917 more rows]

## Sheet: Sup. Table S4
Supplementary Table S4. List of conserved Blue shark_lncRNAs and their Blast results
[truncated: 13 more rows]

[truncated: 2 more sheets: Sup.Table S5, Sup.Table S6]
